# Supplementary material for: Characterization of metabolic responses, genetic variations, and microsatellite instability in ammonia-stressed CHO cells grown in fed-batch cultures
Source: BMC Biotechnol. 2021 Jan 8;21:4. doi: 10.1186/s12896-020-00667-2 (PMC7791692; doi:10.1186/s12896-020-00667-2)
Supplement: Supplementary file 2 — Additional file 2: Supplemental Table S6. KEGG enrichment of variant genes that can be linked to genome instability. Supplemental Table S7. Statistically significant Biological Process GO terms of variant genes. Supplemental Table S8. Statistically significant Molecular Function GO terms of variant genes. Supplemental Table S9. Statistically significant Cellular Component GO terms of variant genes. Supplemental Table S10. Complete list of microsatelites found in the Chinese hamster genome. Supplemental Table S11. Microsatellites containing insertion and or deletion mutations. Supplemental Table S12. Indel loci with higher mutation frequencies in 30 mM ammonia-stressed cultures. Supplemental Table S13. Indel loci from table S12 where mutation frequency is higher in the 10 mM samples compared to the control. Supplemental Table S14. The intersection of dose-dependent indels (Table S13) and genome-wide microsatellites (S10). Supplemental Table S15. The 124 candidate microsatelite loci that exhibited dose-dependent variation in response to ammonia stress. [file 12896_2020_667_MOESM2_ESM.xlsx]

## Sheet: S6 KEGG Enrichment
Supplemental Table S6: KEGG enrichment of variant genes that can be linked to genome instability.
Cluster	ID	Description	GeneRatio	BgRatio	pvalue	p.adjust	qvalue	geneID	Count
10mM	hsa05224	Breast cancer	9/111	147/8035	0.00018592	0.0242367	0.0205233	2324/2535/4040/4851/5241/5604/672/7471/8600	9
10mM	hsa04211	Longevity regulating pathway	7/111	89/8035	0.000215437	0.0242367	0.0205233	1386/4790/53632/5468/7249/9365/9821	7
10mM	hsa04114	Oocyte meiosis	8/111	128/8035	0.000372532	0.0279399	0.023659	27330/5241/5499/5604/6197/8454/8945/898	8
10mM	hsa04120	Ubiquitin mediated proteolysis	8/111	136/8035	0.000559782	0.0314877	0.0266633	10054/329/51366/672/7329/8454/8925/8945	8
10mM	hsa04010	MAPK signaling pathway	12/111	294/8035	0.000710017	0.0318062	0.026933	1386/1846/2318/2324/27330/3312/4790/5598/5604/5922/6197/773	12
10mM	hsa03460	Fanconi anemia pathway	5/111	54/8035	0.000848166	0.0318062	0.026933	2175/2187/6117/641/672	5
10mM	hsa04150	mTOR signaling pathway	8/111	155/8035	0.00131767	0.0423537	0.0358644	2535/27330/4040/5604/6194/6197/7249/7471	8
10mM	hsa04218	Cellular senescence	8/111	160/8035	0.00161421	0.0453996	0.0384436	1874/286826/4790/5499/5604/7249/8945/898	8
30mM	hsa04211	Longevity regulating pathway	7/102	89/8035	0.000126948	0.0201723	0.0162664	1386/4790/53632/5468/7157/7249/9821	7
30mM	hsa04218	Cellular senescence	9/102	160/8035	0.000185067	0.0201723	0.0162664	286826/3552/4790/5499/5604/7046/7157/7249/8945	9
30mM	hsa05224	Breast cancer	8/102	147/8035	0.000533104	0.0303965	0.0245109	2535/4040/4851/4853/5241/5604/672/7157	8
30mM	hsa04514	Cell adhesion molecules (CAMs)	8/102	148/8035	0.000557734	0.0303965	0.0245109	1000/1003/1462/214/3684/3695/6401/6900	8
combined	hsa05224	Breast cancer	11/148	147/8035	7.89593e-05	0.0177903	0.0142569	2324/2535/4040/4851/4853/5241/5604/672/7157/7471/8600	11
combined	hsa04218	Cellular senescence	11/148	160/8035	0.000168753	0.0177903	0.0142569	1874/286826/3552/4790/5499/5604/7046/7157/7249/8945/898	11
combined	hsa04211	Longevity regulating pathway	8/148	89/8035	0.000219634	0.0177903	0.0142569	1386/4790/53632/5468/7157/7249/9365/9821	8
combined	hsa04010	MAPK signaling pathway	15/148	294/8035	0.000321627	0.0195388	0.0156581	1386/1846/2318/2324/27330/3312/3552/4790/5598/5604/5922/6197/7046/7157/773	15
combined	hsa04110	Cell cycle	9/148	124/8035	0.00044877	0.0218102	0.0174784	10735/1874/25/4999/5591/7157/8454/8556/898	9
combined	hsa04114	Oocyte meiosis	9/148	128/8035	0.0005665	0.0229432	0.0183864	27330/367/5241/5499/5604/6197/8454/8945/898	9
combined	hsa03440	Homologous recombination	5/148	41/8035	0.000870231	0.0302094	0.0242094	5893/5932/6117/641/672	5
combined	hsa04514	Cell adhesion molecules (CAMs)	9/148	148/8035	0.00159532	0.0451365	0.0361717	1000/1003/1462/214/3684/3695/6401/6900/914	9
combined	hsa05226	Gastric cancer	9/148	149/8035	0.00167172	0.0451365	0.0361717	2535/4040/4583/5604/7015/7046/7157/7471/898	9

## Sheet: S7 BP GO
Supplemental Table S7: Statistically significant Biological Process GO terms of variant genes.
ID	Description	GeneRatio	BgRatio	pvalue	p.adjust	qvalue	geneID	Count	FoldEnrichment
GO:0048732	gland development	12/110	434/18670	9.6211e-06	0.0116826	0.00993696	10765/25/3239/4040/4851/5241/5591/5604/7049/7919/8945/9821	12	4.69292
GO:0061138	morphogenesis of a branching epithelium	8/110	182/18670	1.22824e-05	0.0116826	0.00993696	10765/25/3239/4040/4851/5241/5499/8945	8	7.46054
GO:0060562	epithelial tube morphogenesis	10/110	322/18670	2.0692e-05	0.0116826	0.00993696	10765/25/2535/4040/4851/5241/5499/7249/80184/8945	10	5.27103
GO:0001763	morphogenesis of a branching structure	8/110	196/18670	2.09967e-05	0.0116826	0.00993696	10765/25/3239/4040/4851/5241/5499/8945	8	6.92764
GO:0048754	branching morphogenesis of an epithelial tube	7/110	150/18670	2.99381e-05	0.0138813	0.0118072	10765/25/4040/4851/5241/5499/8945	7	7.92061
GO:0048608	reproductive structure development	11/110	431/18670	4.79114e-05	0.0146219	0.0124371	10765/2175/2186/3239/4040/4851/5241/5468/5604/6194/899	11	4.33179
GO:0061458	reproductive system development	11/110	434/18670	5.10023e-05	0.0146219	0.0124371	10765/2175/2186/3239/4040/4851/5241/5468/5604/6194/899	11	4.30184
GO:0030111	regulation of Wnt signaling pathway	10/110	363/18670	5.7053e-05	0.0146219	0.0124371	1000/25/3090/4040/4790/4851/5499/7015/7249/8945	10	4.67568
GO:0006310	DNA recombination	9/110	292/18670	5.78149e-05	0.0146219	0.0124371	2187/23137/27030/5591/56916/5893/6117/672/79913	9	5.23132
GO:0022612	gland morphogenesis	6/110	120/18670	7.7261e-05	0.0158395	0.0134728	10765/3239/4040/4851/5241/8945	6	8.48636
GO:0032200	telomere organization	7/110	175/18670	7.971e-05	0.0158395	0.0134728	23137/5426/5591/5976/6117/7015/84444	7	6.78909
GO:0045765	regulation of angiogenesis	10/110	383/18670	8.90474e-05	0.0159811	0.0135932	1003/1386/25/4851/4881/5468/5598/641700/672/7015	10	4.43152
GO:0090398	cellular senescence	5/110	78/18670	9.71579e-05	0.0159811	0.0135932	23137/25/5591/5604/7015	5	10.88
GO:0006302	double-strand break repair	8/110	248/18670	0.000110537	0.0161849	0.0137666	2187/23137/5591/56916/5893/6117/672/79913	8	5.47507
GO:0071897	DNA biosynthetic process	7/110	196/18670	0.000161398	0.0213815	0.0181867	11232/286826/5426/5468/6117/7015/7919	7	6.06169
GO:1904035	regulation of epithelial cell apoptotic process	5/110	88/18670	0.000172079	0.0217602	0.0185088	25/2934/5598/641700/7015	5	9.6436
GO:1901342	regulation of vasculature development	10/110	422/18670	0.000196251	0.0237378	0.0201909	1003/1386/25/4851/4881/5468/5598/641700/672/7015	10	4.02197
GO:0000077	DNA damage checkpoint	6/110	145/18670	0.000218336	0.0253088	0.0215272	1386/5591/672/7919/80254/84444	6	7.0232
GO:0035148	tube formation	6/110	148/18670	0.000243915	0.0253816	0.0215891	25/2535/4040/4851/7249/80184	6	6.88084
GO:0055006	cardiac cell development	5/110	95/18670	0.000246335	0.0253816	0.0215891	4628/4851/7049/7273/7919	5	8.93301
GO:2001020	regulation of response to DNA damage stimulus	7/110	214/18670	0.00027634	0.0254192	0.0216211	2187/25/3090/5591/5893/672/7919	7	5.55183
GO:0030902	hindbrain development	6/110	152/18670	0.000281626	0.0254192	0.0216211	25/4040/4628/5604/80184/8925	6	6.69976
GO:0000075	cell cycle checkpoint	7/110	216/18670	0.000292385	0.0254192	0.0216211	1386/5591/6194/672/7919/80254/84444	7	5.50042
GO:0010001	glial cell differentiation	7/110	218/18670	0.000309171	0.0260641	0.0221696	1000/25/2934/4851/5468/5604/6900	7	5.44996
GO:0042063	gliogenesis	8/110	290/18670	0.000320608	0.0262332	0.0223135	1000/25/2934/4851/5468/5604/6900/7015	8	4.68213
GO:0031570	DNA integrity checkpoint	6/110	157/18670	0.000335047	0.0264876	0.0225298	1386/5591/672/7919/80254/84444	6	6.48639
GO:0021549	cerebellum development	5/110	102/18670	0.000342758	0.0264876	0.0225298	25/4040/4628/5604/8925	5	8.31996
GO:0000723	telomere maintenance	6/110	162/18670	0.000396106	0.0289968	0.0246641	23137/5426/5591/5976/6117/7015	6	6.2862
GO:0042110	T cell activation	10/110	464/18670	0.00041692	0.0289968	0.0246641	2175/25/2934/387357/4627/5591/6194/7535/84695/921	10	3.65792
GO:0042692	muscle cell differentiation	9/110	385/18670	0.000456319	0.0305549	0.0259894	1000/2318/25/4627/4628/4851/5725/7273/7919	9	3.96765
GO:0097305	response to alcohol	7/110	233/18670	0.000461289	0.0305549	0.0259894	1815/23209/2934/4040/5468/672/7049	7	5.0991
GO:0022037	metencephalon development	5/110	111/18670	0.000505787	0.0319526	0.0271783	25/4040/4628/5604/8925	5	7.64537
GO:1904019	epithelial cell apoptotic process	5/110	111/18670	0.000505787	0.0319526	0.0271783	25/2934/5598/641700/7015	5	7.64537
GO:0033002	muscle cell proliferation	7/110	239/18670	0.000536745	0.0319526	0.0271783	4851/4881/5468/5591/7015/7049/7919	7	4.97109
GO:0030217	T cell differentiation	7/110	240/18670	0.000550225	0.0319526	0.0271783	2175/25/387357/5591/6194/7535/84695	7	4.95038
GO:0042752	regulation of circadian rhythm	5/110	114/18670	0.000571316	0.0319526	0.0271783	1815/5468/5499/5591/8945	5	7.44418
GO:0007569	cell aging	5/110	116/18670	0.000618413	0.0329535	0.0280296	23137/25/5591/5604/7015	5	7.31583
GO:0007059	chromosome segregation	8/110	321/18670	0.000627798	0.0329535	0.0280296	1060/23137/27030/4288/56916/672/7273/7329	8	4.22996
GO:0051321	meiotic cell cycle	7/110	249/18670	0.000684089	0.0346025	0.0294322	10426/1060/2175/27030/4627/54456/6117	7	4.77145
GO:0014013	regulation of gliogenesis	5/110	124/18670	0.000836436	0.0408239	0.034724	1000/4851/5468/6900/7015	5	6.84384
GO:0050673	epithelial cell proliferation	9/110	434/18670	0.00106839	0.0476544	0.0405339	10765/1386/4851/5241/5468/5591/5604/7049/8945	9	3.51969
GO:0072175	epithelial tube formation	5/110	132/18670	0.00110723	0.0476544	0.0405339	25/2535/4040/7249/80184	5	6.42906
GO:0060249	anatomical structure homeostasis	9/110	437/18670	0.00112092	0.0476544	0.0405339	23137/3635/4583/4851/5426/5591/5976/6117/7015	9	3.49553
GO:0060541	respiratory system development	6/110	198/18670	0.00113279	0.0476544	0.0405339	4040/4851/5241/5499/5604/84695	6	5.14325
GO:0042770	signal transduction in response to DNA damage	5/110	133/18670	0.00114516	0.0476544	0.0405339	25/3090/5591/672/80254	5	6.38072
GO:0030098	lymphocyte differentiation	8/110	353/18670	0.0011596	0.0476544	0.0405339	2175/25/3635/387357/5591/6194/7535/84695	8	3.84651
GO:0098742	cell-cell adhesion via plasma-membrane adhesion molecules	7/110	273/18670	0.00117002	0.0476544	0.0405339	1000/1003/11122/5598/6401/6900/83872	7	4.35198
GO:0000724	double-strand break repair via homologous recombination	5/110	134/18670	0.00118404	0.0476544	0.0405339	2187/23137/5893/6117/672	5	6.33311
GO:0000725	recombinational repair	5/110	135/18670	0.00122389	0.0476544	0.0405339	2187/23137/5893/6117/672	5	6.2862
GO:0050852	T cell receptor signaling pathway	6/110	202/18670	0.00125521	0.0478355	0.040688	25/3635/387357/4790/7535/8945	6	5.0414
GO:0035265	organ growth	6/110	204/18670	0.0013201	0.0496285	0.042213	1303/4851/4921/5447/7049/7919	6	4.99198

## Sheet: S8 MF GO
Supplemental Table S8: Statistically significant Molecular Function GO terms of variant genes.
ID	Description	GeneRatio	BgRatio	pvalue	p.adjust	qvalue	geneID	Count	FoldEnrichment	ontology
GO:0004386	helicase activity	7/108	163/17697	6.32048e-05	0.0214896	0.0186953	54456/56916/57634/5976/7919/79913/8458	7	7.03698	MF
GO:0051015	actin filament binding	7/108	198/17697	0.000212127	0.0240411	0.020915	122622/25/2934/4627/4628/7273/8522	7	5.79307	MF
GO:0019902	phosphatase binding	6/108	185/17697	0.000953337	0.0474495	0.0412796	1000/1003/11122/5468/5499/7249	6	5.31441	MF
GO:0003779	actin binding	9/108	431/17697	0.00129359	0.0474495	0.0412796	122622/2318/25/2934/4627/4628/7273/8522/9260	9	3.42169	MF
GO:0004713	protein tyrosine kinase activity	5/108	134/17697	0.00138006	0.0474495	0.0412796	25/4921/5604/7273/7535	5	6.11422	MF
GO:0019903	protein phosphatase binding	5/108	140/17697	0.00167469	0.0474495	0.0412796	1000/1003/11122/5468/5499	5	5.85218	MF

## Sheet: S9 CC GO
Supplemental Table S9: Statistically significant Cellular Component GO terms of variant genes.
ID	Description	GeneRatio	BgRatio	pvalue	p.adjust	qvalue	geneID	Count	FoldEnrichment
GO:0032155	cell division site part	5/110	63/19717	2.67947e-05	0.00356928	0.0027884	10426/1060/4627/4628/83872	5	14.2258
GO:0000781	chromosome, telomeric region	7/110	161/19717	3.34103e-05	0.00356928	0.0027884	23137/5499/5591/5976/6117/7015/84444	7	7.79328
GO:0032153	cell division site	5/110	68/19717	3.88683e-05	0.00356928	0.0027884	10426/1060/4627/4628/83872	5	13.1798
GO:0005913	cell-cell adherens junction	6/110	117/19717	4.97461e-05	0.00356928	0.0027884	1000/1003/4627/5499/83872/9260	6	9.19207
GO:0000794	condensed nuclear chromosome	5/110	99/19717	0.000232555	0.00815434	0.00637034	1060/27030/672/7273/7329	5	9.0528
GO:0016605	PML body	5/110	99/19717	0.000232555	0.00815434	0.00637034	23137/5598/6117/7015/7329	5	9.0528
GO:0000793	condensed chromosome	7/110	223/19717	0.000255711	0.00815434	0.00637034	1060/23137/27030/4288/672/7273/7329	7	5.62654
GO:0000784	nuclear chromosome, telomeric region	5/110	125/19717	0.000680044	0.0167932	0.0131192	5499/5591/5976/6117/7015	5	7.16982
GO:0098687	chromosomal region	8/110	349/19717	0.000760669	0.0167932	0.0131192	1060/23137/5499/5591/5976/6117/7015/84444	8	4.10878
GO:0005911	cell-cell junction	9/110	459/19717	0.00108172	0.020697	0.0161689	1000/1003/23209/387357/4627/5499/7535/83872/9260	9	3.51462
GO:0005925	focal adhesion	8/110	405/19717	0.00195857	0.0294243	0.0229869	1000/2318/2535/2934/4627/4921/5604/9260	8	3.54065
GO:0005924	cell-substrate adherens junction	8/110	408/19717	0.00205047	0.0294243	0.0229869	1000/2318/2535/2934/4627/4921/5604/9260	8	3.51462
GO:0030055	cell-substrate junction	8/110	412/19717	0.00217827	0.0297697	0.0232567	1000/2318/2535/2934/4627/4921/5604/9260	8	3.48049
GO:0044450	microtubule organizing center part	5/110	185/19717	0.00381126	0.0420704	0.0328663	10426/672/80184/80254/899	5	4.84447

## Sheet: S10 Genome-wide MS
Supplemental Table S10: Complete list of microsatelites found in the Chinese hamster genome.
Misa Scaffold	Motif number	Motif	No. bp in repeat unit	start	stop	Motif number	Motif	No. bp in repeat unit
NW_020822366.1	p2	(AC)26	52	7129	7180	p2	(AC)26	52
NW_020822366.1	p2	(AC)25	50	23999	24048	p2	(AC)25	50
NW_020822366.1	p2	(GT)19	38	31419	31456	p2	(GT)19	38
NW_020822366.1	p2	(CA)27	54	41782	41835	p2	(CA)27	54
NW_020822366.1	p2	(TG)25	50	46913	46962	p2	(TG)25	50
NW_020822366.1	p2	(AC)29	58	52959	53016	p2	(AC)29	58
NW_020822366.1	p2	(TC)14	28	69077	69104	p2	(TC)14	28
NW_020822366.1	p2	(GA)10	20	69503	69522	p2	(GA)10	20
NW_020822366.1	p2	(TG)28	56	72950	73005	p2	(TG)28	56
NW_020822366.1	p2	(GT)22	44	90753	90796	p2	(GT)22	44
NW_020822366.1	p2	(AC)30	60	92783	92842	p2	(AC)30	60
NW_020822366.1	p2	(CA)9	18	93596	93613	p2	(CA)9	18
NW_020822366.1	p2	(CA)35	70	104076	104145	p2	(CA)35	70
NW_020822366.1	p2	(GT)22	44	110061	110104	p2	(GT)22	44
NW_020822366.1	p2	(AG)6	12	112005	112016	p2	(AG)6	12
NW_020822366.1	p2	(AC)29	58	119299	119356	p2	(AC)29	58
NW_020822366.1	p2	(AC)24	48	126288	126335	p2	(AC)24	48
NW_020822366.1	p2	(TC)26	52	131434	131485	p2	(TC)26	52
NW_020822366.1	p2	(AC)12	24	138191	138214	p2	(AC)12	24
NW_020822366.1	p2	(TG)13	26	152026	152051	p2	(TG)13	26
NW_020822366.1	p2	(CA)8	16	167025	167040	p2	(CA)8	16
NW_020822366.1	p2	(GT)7	14	176159	176172	p2	(GT)7	14
NW_020822366.1	p2	(AT)23	46	186198	186243	p2	(AT)23	46
NW_020822366.1	p2	(AC)23	46	186483	186528	p2	(AC)23	46
NW_020822366.1	p2	(TC)22	44	189987	190030	p2	(TC)22	44
NW_020822366.1	p2	(GT)7	14	201967	201980	p2	(GT)7	14
NW_020822366.1	p2	(AT)17	34	202483	202516	p2	(AT)17	34
NW_020822366.1	p2	(AC)24	48	202678	202725	p2	(AC)24	48
NW_020822366.1	p2	(AT)22	44	233894	233937	p2	(AT)22	44
NW_020822366.1	p2	(CA)24	48	241053	241100	p2	(CA)24	48
NW_020822366.1	p2	(AC)14	28	245921	245948	p2	(AC)14	28
NW_020822366.1	p2	(GT)19	38	254299	254336	p2	(GT)19	38
NW_020822366.1	p2	(TG)24	48	261533	261580	p2	(TG)24	48
NW_020822366.1	p2	(AC)20	40	262077	262116	p2	(AC)20	40
NW_020822366.1	p2	(AC)6	12	262320	262331	p2	(AC)6	12
NW_020822366.1	p2	(TG)7	14	266001	266014	p2	(TG)7	14
NW_020822366.1	p2	(TG)7	14	268627	268640	p2	(TG)7	14
NW_020822366.1	p2	(GT)8	16	277526	277541	p2	(GT)8	16
NW_020822366.1	p2	(TC)6	12	281627	281638	p2	(TC)6	12
NW_020822366.1	p2	(GT)18	36	282351	282386	p2	(GT)18	36
NW_020822366.1	p2	(TC)6	12	288598	288609	p2	(TC)6	12
NW_020822366.1	p2	(GT)24	48	303454	303501	p2	(GT)24	48
NW_020822366.1	p2	(GT)14	28	307392	307419	p2	(GT)14	28
NW_020822366.1	p2	(AC)22	44	325935	325978	p2	(AC)22	44
NW_020822366.1	p2	(CA)7	14	329384	329397	p2	(CA)7	14
NW_020822366.1	p2	(GT)27	54	332562	332615	p2	(GT)27	54
NW_020822366.1	p2	(CA)7	14	347239	347252	p2	(CA)7	14
NW_020822366.1	p2	(CA)30	60	351701	351760	p2	(CA)30	60
NW_020822366.1	p2	(AG)27	54	353826	353879	p2	(AG)27	54
NW_020822366.1	p2	(AT)20	40	358586	358625	p2	(AT)20	40
NW_020822366.1	p2	(CA)8	16	358913	358928	p2	(CA)8	16
NW_020822366.1	p2	(TG)6	12	368110	368121	p2	(TG)6	12
NW_020822366.1	p2	(GT)27	54	373956	374009	p2	(GT)27	54
NW_020822366.1	p2	(GT)11	22	380401	380422	p2	(GT)11	22
NW_020822366.1	p2	(GT)8	16	386977	386992	p2	(GT)8	16
NW_020822366.1	p2	(CA)7	14	391558	391571	p2	(CA)7	14
NW_020822366.1	p2	(CT)6	12	400207	400218	p2	(CT)6	12
NW_020822366.1	p2	(GT)22	44	408403	408446	p2	(GT)22	44
NW_020822366.1	p2	(AG)24	48	430924	430971	p2	(AG)24	48
NW_020822366.1	p2	(AC)13	26	445710	445735	p2	(AC)13	26
NW_020822366.1	p2	(GT)23	46	449916	449961	p2	(GT)23	46
NW_020822366.1	p2	(AC)27	54	463803	463856	p2	(AC)27	54
NW_020822366.1	p2	(AC)30	60	477189	477248	p2	(AC)30	60
NW_020822366.1	p2	(CA)23	46	482524	482569	p2	(CA)23	46
NW_020822366.1	p2	(TG)16	32	483574	483605	p2	(TG)16	32
NW_020822366.1	p2	(AC)25	50	484573	484622	p2	(AC)25	50
NW_020822366.1	p2	(AG)6	12	485619	485630	p2	(AG)6	12
NW_020822366.1	p2	(AC)17	34	495366	495399	p2	(AC)17	34
NW_020822366.1	p2	(AC)6	12	501391	501402	p2	(AC)6	12
NW_020822366.1	p2	(CT)9	18	514270	514287	p2	(CT)9	18
NW_020822366.1	p2	(AC)22	44	519944	519987	p2	(AC)22	44
NW_020822366.1	p2	(AC)13	26	529217	529242	p2	(AC)13	26
NW_020822366.1	p2	(TC)10	20	531964	531983	p2	(TC)10	20
NW_020822366.1	p2	(CA)6	12	533134	533145	p2	(CA)6	12
NW_020822366.1	p2	(AG)6	12	537413	537424	p2	(AG)6	12
NW_020822366.1	p2	(AC)15	30	546723	546752	p2	(AC)15	30
NW_020822366.1	p2	(TA)20	40	549194	549233	p2	(TA)20	40
NW_020822366.1	p2	(AT)22	44	557038	557081	p2	(AT)22	44
NW_020822366.1	p2	(AC)22	44	558852	558895	p2	(AC)22	44
NW_020822366.1	p2	(CA)22	44	559294	559337	p2	(CA)22	44
NW_020822366.1	p2	(TA)16	32	569121	569152	p2	(TA)16	32
NW_020822366.1	p2	(TG)25	50	579233	579282	p2	(TG)25	50
NW_020822366.1	p2	(AC)18	36	581515	581550	p2	(AC)18	36
NW_020822366.1	p2	(GT)22	44	600767	600810	p2	(GT)22	44
NW_020822366.1	p2	(TG)6	12	634673	634684	p2	(TG)6	12
NW_020822366.1	p2	(TG)24	48	643448	643495	p2	(TG)24	48
NW_020822366.1	p2	(AC)27	54	662165	662218	p2	(AC)27	54
NW_020822366.1	p2	(AC)6	12	673207	673218	p2	(AC)6	12
NW_020822366.1	p2	(AT)19	38	675917	675954	p2	(AT)19	38
NW_020822366.1	p2	(CA)29	58	690550	690607	p2	(CA)29	58
NW_020822366.1	p2	(AG)20	40	693327	693366	p2	(AG)20	40
NW_020822366.1	p2	(CA)30	60	699257	699316	p2	(CA)30	60
NW_020822366.1	p2	(GT)25	50	717866	717915	p2	(GT)25	50
NW_020822366.1	p2	(TG)10	20	726524	726543	p2	(TG)10	20
NW_020822366.1	p2	(GT)7	14	742440	742453	p2	(GT)7	14
NW_020822366.1	p2	(AC)24	48	744774	744821	p2	(AC)24	48
NW_020822366.1	p2	(AG)6	12	746088	746099	p2	(AG)6	12
NW_020822366.1	p2	(AC)18	36	752048	752083	p2	(AC)18	36
NW_020822366.1	p2	(TG)28	56	752914	752969	p2	(TG)28	56
NW_020822366.1	p2	(GT)23	46	757113	757158	p2	(GT)23	46
NW_020822366.1	p2	(CT)23	46	758631	758676	p2	(CT)23	46
NW_020822366.1	p2	(TG)15	30	762871	762900	p2	(TG)15	30
NW_020822366.1	p2	(AC)23	46	789348	789393	p2	(AC)23	46
NW_020822366.1	p2	(TG)16	32	794100	794131	p2	(TG)16	32
NW_020822366.1	p2	(AC)25	50	809641	809690	p2	(AC)25	50
NW_020822366.1	p2	(AC)16	32	817711	817742	p2	(AC)16	32
NW_020822366.1	p2	(TC)25	50	820736	820785	p2	(TC)25	50
NW_020822366.1	p2	(GT)6	12	820915	820926	p2	(GT)6	12
NW_020822366.1	p2	(CA)24	48	837298	837345	p2	(CA)24	48
NW_020822366.1	p2	(AC)7	14	838773	838786	p2	(AC)7	14
NW_020822366.1	p2	(GT)20	40	847262	847301	p2	(GT)20	40
NW_020822366.1	p2	(AC)24	48	869682	869729	p2	(AC)24	48
NW_020822366.1	p2	(AC)30	60	876771	876830	p2	(AC)30	60
NW_020822366.1	p2	(CT)8	16	880981	880996	p2	(CT)8	16
NW_020822366.1	p2	(TC)16	32	882169	882200	p2	(TC)16	32
NW_020822366.1	p2	(GT)21	42	886296	886337	p2	(GT)21	42
NW_020822366.1	p2	(AC)50	100	896292	896391	p2	(AC)50	100
NW_020822366.1	p2	(GA)7	14	902575	902588	p2	(GA)7	14
NW_020822366.1	p2	(TG)10	20	910209	910228	p2	(TG)10	20
NW_020822366.1	p2	(TC)6	12	914918	914929	p2	(TC)6	12
NW_020822366.1	p2	(TG)23	46	932543	932588	p2	(TG)23	46
NW_020822366.1	p2	(CA)20	40	944768	944807	p2	(CA)20	40
NW_020822366.1	p2	(AC)23	46	950360	950405	p2	(AC)23	46
NW_020822366.1	p2	(TG)21	42	953404	953445	p2	(TG)21	42
NW_020822366.1	p2	(AT)6	12	968813	968824	p2	(AT)6	12
NW_020822366.1	p2	(AC)22	44	976150	976193	p2	(AC)22	44
NW_020822366.1	p2	(AG)18	36	984614	984649	p2	(AG)18	36
NW_020822366.1	p2	(GT)20	40	985195	985234	p2	(GT)20	40
NW_020822366.1	p2	(GT)34	68	988116	988183	p2	(GT)34	68
NW_020822366.1	p2	(AG)23	46	996141	996186	p2	(AG)23	46
NW_020822366.1	p2	(TG)6	12	1003138	1003149	p2	(TG)6	12
NW_020822366.1	p2	(GT)24	48	1015685	1015732	p2	(GT)24	48
NW_020822366.1	p2	(AC)32	64	1021749	1021812	p2	(AC)32	64
NW_020822366.1	p2	(GT)28	56	1024307	1024362	p2	(GT)28	56
NW_020822366.1	p2	(CA)29	58	1030497	1030554	p2	(CA)29	58
NW_020822366.1	p2	(AC)21	42	1031938	1031979	p2	(AC)21	42
NW_020822366.1	p2	(TC)24	48	1037798	1037845	p2	(TC)24	48
NW_020822366.1	p2	(AT)21	42	1041226	1041267	p2	(AT)21	42
NW_020822366.1	p2	(GT)20	40	1046432	1046471	p2	(GT)20	40
NW_020822366.1	p2	(AC)24	48	1055696	1055743	p2	(AC)24	48
NW_020822366.1	p2	(GA)29	58	1078400	1078457	p2	(GA)29	58
NW_020822366.1	p2	(AC)13	26	1083522	1083547	p2	(AC)13	26
NW_020822366.1	p2	(AC)23	46	1092526	1092571	p2	(AC)23	46
NW_020822366.1	p2	(AC)15	30	1100312	1100341	p2	(AC)15	30
NW_020822366.1	p2	(AG)25	50	1132322	1132371	p2	(AG)25	50
NW_020822366.1	p2	(GA)22	44	1136275	1136318	p2	(GA)22	44
NW_020822366.1	p2	(GT)23	46	1161753	1161798	p2	(GT)23	46
NW_020822366.1	p2	(TG)6	12	1166567	1166578	p2	(TG)6	12
NW_020822366.1	p2	(TG)29	58	1186100	1186157	p2	(TG)29	58
NW_020822366.1	p2	(TG)6	12	1186439	1186450	p2	(TG)6	12
NW_020822366.1	p2	(AC)13	26	1187876	1187901	p2	(AC)13	26
NW_020822366.1	p2	(GT)29	58	1198998	1199055	p2	(GT)29	58
NW_020822366.1	p2	(AC)25	50	1200463	1200512	p2	(AC)25	50
NW_020822366.1	p2	(GT)28	56	1201211	1201266	p2	(GT)28	56
NW_020822366.1	p2	(CA)6	12	1209860	1209871	p2	(CA)6	12
NW_020822366.1	p2	(GT)8	16	1215259	1215274	p2	(GT)8	16
NW_020822366.1	p2	(AC)33	66	1215490	1215555	p2	(AC)33	66
NW_020822366.1	p2	(GA)8	16	1216610	1216625	p2	(GA)8	16
NW_020822366.1	p2	(AC)27	54	1226898	1226951	p2	(AC)27	54
NW_020822366.1	p2	(TC)6	12	1256428	1256439	p2	(TC)6	12
NW_020822366.1	p2	(CA)25	50	1260937	1260986	p2	(CA)25	50
NW_020822366.1	p2	(CA)25	50	1269646	1269695	p2	(CA)25	50
NW_020822366.1	p2	(TG)27	54	1273538	1273591	p2	(TG)27	54
NW_020822366.1	p2	(GT)23	46	1282943	1282988	p2	(GT)23	46
NW_020822366.1	p2	(TG)21	42	1289300	1289341	p2	(TG)21	42
NW_020822366.1	p2	(GT)22	44	1289615	1289658	p2	(GT)22	44
NW_020822366.1	p2	(TC)19	38	1290461	1290498	p2	(TC)19	38
NW_020822366.1	p2	(TA)9	18	1297238	1297255	p2	(TA)9	18
NW_020822366.1	p2	(TC)24	48	1300482	1300529	p2	(TC)24	48
NW_020822366.1	p2	(CT)6	12	1308932	1308943	p2	(CT)6	12
NW_020822366.1	p2	(GT)29	58	1315682	1315739	p2	(GT)29	58
NW_020822366.1	p2	(CA)7	14	1353102	1353115	p2	(CA)7	14
NW_020822366.1	p2	(CA)11	22	1367630	1367651	p2	(CA)11	22
NW_020822366.1	p2	(TG)18	36	1393532	1393567	p2	(TG)18	36
NW_020822366.1	p2	(CA)25	50	1395193	1395242	p2	(CA)25	50
NW_020822366.1	p2	(GT)9	18	1398284	1398301	p2	(GT)9	18
NW_020822366.1	p2	(AC)22	44	1410583	1410626	p2	(AC)22	44
NW_020822366.1	p2	(TG)23	46	1422439	1422484	p2	(TG)23	46
NW_020822366.1	p2	(AC)21	42	1432020	1432061	p2	(AC)21	42
NW_020822366.1	p2	(GT)6	12	1433374	1433385	p2	(GT)6	12
NW_020822366.1	p2	(AC)20	40	1433650	1433689	p2	(AC)20	40
NW_020822366.1	p2	(TG)25	50	1433969	1434018	p2	(TG)25	50
NW_020822366.1	p2	(AG)10	20	1435818	1435837	p2	(AG)10	20
NW_020822366.1	p2	(TG)27	54	1446556	1446609	p2	(TG)27	54
NW_020822366.1	p2	(AG)24	48	1447701	1447748	p2	(AG)24	48
NW_020822366.1	p2	(CA)21	42	1458284	1458325	p2	(CA)21	42
NW_020822366.1	p2	(CA)8	16	1458553	1458568	p2	(CA)8	16
NW_020822366.1	p2	(AC)25	50	1462865	1462914	p2	(AC)25	50
NW_020822366.1	p2	(AC)23	46	1472943	1472988	p2	(AC)23	46
NW_020822366.1	p2	(CA)20	40	1477975	1478014	p2	(CA)20	40
NW_020822366.1	p2	(GT)17	34	1482850	1482883	p2	(GT)17	34
NW_020822366.1	p2	(AC)18	36	1491521	1491556	p2	(AC)18	36
NW_020822366.1	p2	(GT)28	56	1517114	1517169	p2	(GT)28	56
NW_020822366.1	p2	(AG)6	12	1524684	1524695	p2	(AG)6	12
NW_020822366.1	p2	(CA)22	44	1529300	1529343	p2	(CA)22	44
NW_020822366.1	p2	(CA)18	36	1529845	1529880	p2	(CA)18	36
NW_020822366.1	p2	(GT)25	50	1536517	1536566	p2	(GT)25	50
NW_020822366.1	p2	(CA)25	50	1537763	1537812	p2	(CA)25	50
NW_020822366.1	p2	(CA)14	28	1545376	1545403	p2	(CA)14	28
NW_020822366.1	p2	(GT)7	14	1548081	1548094	p2	(GT)7	14
NW_020822366.1	p2	(AC)24	48	1561042	1561089	p2	(AC)24	48
NW_020822366.1	p2	(CT)18	36	1566336	1566371	p2	(CT)18	36
NW_020822366.1	p2	(GA)6	12	1584879	1584890	p2	(GA)6	12
NW_020822366.1	p2	(AT)17	34	1613924	1613957	p2	(AT)17	34
NW_020822366.1	p2	(CT)6	12	1633933	1633944	p2	(CT)6	12
NW_020822366.1	p2	(AT)9	18	1636976	1636993	p2	(AT)9	18
NW_020822366.1	p2	(GT)21	42	1638543	1638584	p2	(GT)21	42
NW_020822366.1	p2	(TG)9	18	1655918	1655935	p2	(TG)9	18
NW_020822366.1	p2	(TG)10	20	1658067	1658086	p2	(TG)10	20
NW_020822366.1	p2	(AC)28	56	1666447	1666502	p2	(AC)28	56
NW_020822366.1	p2	(TG)8	16	1688622	1688637	p2	(TG)8	16
NW_020822366.1	p2	(GA)8	16	1696970	1696985	p2	(GA)8	16
NW_020822366.1	p2	(AC)12	24	1700147	1700170	p2	(AC)12	24
NW_020822366.1	p2	(TG)21	42	1716667	1716708	p2	(TG)21	42
NW_020822366.1	p2	(TG)27	54	1717966	1718019	p2	(TG)27	54
NW_020822366.1	p2	(CT)22	44	1755539	1755582	p2	(CT)22	44
NW_020822366.1	p2	(GT)25	50	1772192	1772241	p2	(GT)25	50
NW_020822366.1	p2	(TG)6	12	1773057	1773068	p2	(TG)6	12
NW_020822366.1	p2	(GT)20	40	1775707	1775746	p2	(GT)20	40
NW_020822366.1	p2	(TG)9	18	1793628	1793645	p2	(TG)9	18
NW_020822366.1	p2	(TG)20	40	1799042	1799081	p2	(TG)20	40
NW_020822366.1	p2	(AT)24	48	1799894	1799941	p2	(AT)24	48
NW_020822366.1	p2	(GT)22	44	1810357	1810400	p2	(GT)22	44
NW_020822366.1	p2	(GT)24	48	1814542	1814589	p2	(GT)24	48
NW_020822366.1	p2	(AG)6	12	1815937	1815948	p2	(AG)6	12
NW_020822366.1	p2	(TG)24	48	1818741	1818788	p2	(TG)24	48
NW_020822366.1	p2	(TG)6	12	1820406	1820417	p2	(TG)6	12
NW_020822366.1	p2	(TG)18	36	1831836	1831871	p2	(TG)18	36
NW_020822366.1	p2	(AT)7	14	1833595	1833608	p2	(AT)7	14
NW_020822366.1	p2	(AC)20	40	1843742	1843781	p2	(AC)20	40
NW_020822366.1	p2	(GT)7	14	1845279	1845292	p2	(GT)7	14
NW_020822366.1	p2	(GA)7	14	1859318	1859331	p2	(GA)7	14
NW_020822366.1	p2	(AT)9	18	1860760	1860777	p2	(AT)9	18
NW_020822366.1	p2	(GT)6	12	1888703	1888714	p2	(GT)6	12
NW_020822366.1	p2	(AC)32	64	1905976	1906039	p2	(AC)32	64
NW_020822366.1	p2	(TG)22	44	1934187	1934230	p2	(TG)22	44
NW_020822366.1	p2	(CA)21	42	1947617	1947658	p2	(CA)21	42
NW_020822366.1	p2	(AG)7	14	1951593	1951606	p2	(AG)7	14
NW_020822366.1	p2	(AC)13	26	1955617	1955642	p2	(AC)13	26
NW_020822366.1	p2	(GT)26	52	1958892	1958943	p2	(GT)26	52
NW_020822366.1	p2	(AG)18	36	1959875	1959910	p2	(AG)18	36
NW_020822366.1	p2	(GT)22	44	1962804	1962847	p2	(GT)22	44
NW_020822366.1	p2	(AC)25	50	1967292	1967341	p2	(AC)25	50
NW_020822366.1	p2	(TG)8	16	1969082	1969097	p2	(TG)8	16
NW_020822366.1	p2	(GT)6	12	1973761	1973772	p2	(GT)6	12
NW_020822366.1	p2	(AC)10	20	1976369	1976388	p2	(AC)10	20
NW_020822366.1	p2	(TG)19	38	1989726	1989763	p2	(TG)19	38
NW_020822366.1	p2	(GT)11	22	2010654	2010675	p2	(GT)11	22
NW_020822366.1	p2	(CT)19	38	2035441	2035478	p2	(CT)19	38
NW_020822366.1	p2	(AT)7	14	2062430	2062443	p2	(AT)7	14
NW_020822366.1	p2	(CA)7	14	2071599	2071612	p2	(CA)7	14
NW_020822366.1	p2	(TG)24	48	2082193	2082240	p2	(TG)24	48
NW_020822366.1	p2	(GA)34	68	2088436	2088503	p2	(GA)34	68
NW_020822366.1	p2	(TC)25	50	2105055	2105104	p2	(TC)25	50
NW_020822366.1	p2	(AC)23	46	2110852	2110897	p2	(AC)23	46
NW_020822366.1	p2	(CA)27	54	2121216	2121269	p2	(CA)27	54
NW_020822366.1	p2	(AC)6	12	2136156	2136167	p2	(AC)6	12
NW_020822366.1	p2	(TG)9	18	2139974	2139991	p2	(TG)9	18
NW_020822366.1	p2	(CA)6	12	2144243	2144254	p2	(CA)6	12
NW_020822366.1	p2	(GT)6	12	2154113	2154124	p2	(GT)6	12
NW_020822366.1	p2	(TC)8	16	2165595	2165610	p2	(TC)8	16
NW_020822366.1	p2	(GT)21	42	2166114	2166155	p2	(GT)21	42
NW_020822366.1	p2	(AC)22	44	2166275	2166318	p2	(AC)22	44
NW_020822366.1	p2	(AC)6	12	2185308	2185319	p2	(AC)6	12
NW_020822366.1	p2	(GT)25	50	2192222	2192271	p2	(GT)25	50
NW_020822366.1	p2	(AC)18	36	2192500	2192535	p2	(AC)18	36
NW_020822366.1	p2	(CA)24	48	2210282	2210329	p2	(CA)24	48
NW_020822366.1	p2	(GT)21	42	2221213	2221254	p2	(GT)21	42
NW_020822366.1	p2	(CT)16	32	2247120	2247151	p2	(CT)16	32
NW_020822366.1	p2	(AC)24	48	2250721	2250768	p2	(AC)24	48
NW_020822366.1	p2	(AG)29	58	2253310	2253367	p2	(AG)29	58
NW_020822366.1	p2	(TG)8	16	2255363	2255378	p2	(TG)8	16
NW_020822366.1	p2	(TA)20	40	2257984	2258023	p2	(TA)20	40
NW_020822366.1	p2	(AT)8	16	2273939	2273954	p2	(AT)8	16
NW_020822366.1	p2	(AC)7	14	2275657	2275670	p2	(AC)7	14
NW_020822366.1	p2	(CA)25	50	2283683	2283732	p2	(CA)25	50
NW_020822366.1	p2	(AC)22	44	2319917	2319960	p2	(AC)22	44
NW_020822366.1	p2	(TG)8	16	2328194	2328209	p2	(TG)8	16
NW_020822366.1	p2	(AC)28	56	2329005	2329060	p2	(AC)28	56
NW_020822366.1	p2	(CA)27	54	2342816	2342869	p2	(CA)27	54
NW_020822366.1	p2	(CA)23	46	2361022	2361067	p2	(CA)23	46
NW_020822366.1	p2	(TG)7	14	2363070	2363083	p2	(TG)7	14
NW_020822366.1	p2	(TG)23	46	2367650	2367695	p2	(TG)23	46
NW_020822366.1	p2	(CA)7	14	2369197	2369210	p2	(CA)7	14
NW_020822366.1	p2	(GT)6	12	2377743	2377754	p2	(GT)6	12
NW_020822366.1	p2	(AC)22	44	2382023	2382066	p2	(AC)22	44
NW_020822366.1	p2	(GT)20	40	2384503	2384542	p2	(GT)20	40
NW_020822366.1	p2	(CA)27	54	2386721	2386774	p2	(CA)27	54
NW_020822366.1	p2	(GA)30	60	2388146	2388205	p2	(GA)30	60
NW_020822366.1	p2	(CA)6	12	2416644	2416655	p2	(CA)6	12
NW_020822366.1	p2	(CT)6	12	2419164	2419175	p2	(CT)6	12
NW_020822366.1	p2	(CT)7	14	2421280	2421293	p2	(CT)7	14
NW_020822366.1	p2	(TG)27	54	2430288	2430341	p2	(TG)27	54
NW_020822366.1	p2	(GT)25	50	2439172	2439221	p2	(GT)25	50
NW_020822366.1	p2	(GT)15	30	2453183	2453212	p2	(GT)15	30
NW_020822366.1	p2	(GA)27	54	2454455	2454508	p2	(GA)27	54
NW_020822366.1	p2	(AC)29	58	2466702	2466759	p2	(AC)29	58
NW_020822366.1	p2	(GT)16	32	2469355	2469386	p2	(GT)16	32
NW_020822366.1	p2	(TG)6	12	2470192	2470203	p2	(TG)6	12
NW_020822366.1	p2	(AC)8	16	2473339	2473354	p2	(AC)8	16
NW_020822366.1	p2	(AC)9	18	2480770	2480787	p2	(AC)9	18
NW_020822366.1	p2	(CT)11	22	2481907	2481928	p2	(CT)11	22
NW_020822366.1	p2	(TG)6	12	2491305	2491316	p2	(TG)6	12
NW_020822366.1	p2	(TG)25	50	2506290	2506339	p2	(TG)25	50
NW_020822366.1	p2	(AG)24	48	2511833	2511880	p2	(AG)24	48
NW_020822366.1	p2	(GT)21	42	2523578	2523619	p2	(GT)21	42
NW_020822366.1	p2	(AC)31	62	2523963	2524024	p2	(AC)31	62
NW_020822366.1	p2	(AC)6	12	2524881	2524892	p2	(AC)6	12
NW_020822366.1	p2	(AG)7	14	2535532	2535545	p2	(AG)7	14
NW_020822366.1	p2	(AC)9	18	2564699	2564716	p2	(AC)9	18
NW_020822366.1	p2	(AC)8	16	2581925	2581940	p2	(AC)8	16
NW_020822366.1	p2	(TG)7	14	2584967	2584980	p2	(TG)7	14
NW_020822366.1	p2	(AC)16	32	2592136	2592167	p2	(AC)16	32
NW_020822366.1	p2	(GT)22	44	2594314	2594357	p2	(GT)22	44
NW_020822366.1	p2	(AG)19	38	2611663	2611700	p2	(AG)19	38
NW_020822366.1	p2	(GT)25	50	2621114	2621163	p2	(GT)25	50
NW_020822366.1	p2	(GT)18	36	2647151	2647186	p2	(GT)18	36
NW_020822366.1	p2	(TA)19	38	2656141	2656178	p2	(TA)19	38
NW_020822366.1	p2	(GA)34	68	2680532	2680599	p2	(GA)34	68
NW_020822366.1	p2	(TA)20	40	2685997	2686036	p2	(TA)20	40
NW_020822366.1	p2	(AC)17	34	2686687	2686720	p2	(AC)17	34
NW_020822366.1	p2	(GT)27	54	2690529	2690582	p2	(GT)27	54
NW_020822366.1	p2	(AC)23	46	2693367	2693412	p2	(AC)23	46
NW_020822366.1	p2	(TG)19	38	2703339	2703376	p2	(TG)19	38
NW_020822366.1	p2	(TG)29	58	2704626	2704683	p2	(TG)29	58
NW_020822366.1	p2	(AG)32	64	2723038	2723101	p2	(AG)32	64
NW_020822366.1	p2	(AC)23	46	2727698	2727743	p2	(AC)23	46
NW_020822366.1	p2	(AC)16	32	2731166	2731197	p2	(AC)16	32
NW_020822366.1	p2	(TA)10	20	2731602	2731621	p2	(TA)10	20
NW_020822366.1	p2	(TA)20	40	2732976	2733015	p2	(TA)20	40
NW_020822366.1	p2	(CA)28	56	2734492	2734547	p2	(CA)28	56
NW_020822366.1	p2	(TG)25	50	2744536	2744585	p2	(TG)25	50
NW_020822366.1	p2	(TC)7	14	2747126	2747139	p2	(TC)7	14
NW_020822366.1	p2	(CA)10	20	2756251	2756270	p2	(CA)10	20
NW_020822366.1	p2	(GA)21	42	2761271	2761312	p2	(GA)21	42
NW_020822366.1	p2	(TG)27	54	2782651	2782704	p2	(TG)27	54
NW_020822366.1	p2	(TG)26	52	2797061	2797112	p2	(TG)26	52
NW_020822366.1	p2	(AC)28	56	2814961	2815016	p2	(AC)28	56
NW_020822366.1	p2	(TG)22	44	2820911	2820954	p2	(TG)22	44
NW_020822366.1	p2	(GT)24	48	2827127	2827174	p2	(GT)24	48
NW_020822366.1	p2	(AG)27	54	2830044	2830097	p2	(AG)27	54
NW_020822366.1	p2	(CA)10	20	2831772	2831791	p2	(CA)10	20
NW_020822366.1	p2	(AC)20	40	2838668	2838707	p2	(AC)20	40
NW_020822366.1	p2	(AC)27	54	2855531	2855584	p2	(AC)27	54
NW_020822366.1	p2	(AC)7	14	2875307	2875320	p2	(AC)7	14
NW_020822366.1	p2	(CA)24	48	2879664	2879711	p2	(CA)24	48
NW_020822366.1	p2	(AC)27	54	2885323	2885376	p2	(AC)27	54
NW_020822366.1	p2	(GT)24	48	2885760	2885807	p2	(GT)24	48
NW_020822366.1	p2	(AT)8	16	2891280	2891295	p2	(AT)8	16
NW_020822366.1	p2	(AT)20	40	2901847	2901886	p2	(AT)20	40
NW_020822366.1	p2	(CT)12	24	2908539	2908562	p2	(CT)12	24
NW_020822366.1	p2	(AT)20	40	2910914	2910953	p2	(AT)20	40
NW_020822366.1	p2	(TG)17	34	2915588	2915621	p2	(TG)17	34
NW_020822366.1	p2	(GA)6	12	2922026	2922037	p2	(GA)6	12
NW_020822366.1	p2	(AC)25	50	2926589	2926638	p2	(AC)25	50
NW_020822366.1	p2	(CT)6	12	2930619	2930630	p2	(CT)6	12
NW_020822366.1	p2	(AG)6	12	2948150	2948161	p2	(AG)6	12
NW_020822366.1	p2	(AT)8	16	2948295	2948310	p2	(AT)8	16
NW_020822366.1	p2	(TA)6	12	2967126	2967137	p2	(TA)6	12
NW_020822366.1	p2	(GA)6	12	2976428	2976439	p2	(GA)6	12
NW_020822366.1	p2	(GT)24	48	2982329	2982376	p2	(GT)24	48
NW_020822366.1	p2	(AC)17	34	2986494	2986527	p2	(AC)17	34
NW_020822366.1	p2	(AC)25	50	2987297	2987346	p2	(AC)25	50
NW_020822366.1	p2	(TG)16	32	2997013	2997044	p2	(TG)16	32
NW_020822366.1	p2	(AT)28	56	3001674	3001729	p2	(AT)28	56
NW_020822366.1	p2	(GT)15	30	3002911	3002940	p2	(GT)15	30
NW_020822366.1	p2	(GT)23	46	3004478	3004523	p2	(GT)23	46
NW_020822366.1	p2	(AC)6	12	3011587	3011598	p2	(AC)6	12
NW_020822366.1	p2	(AG)22	44	3025662	3025705	p2	(AG)22	44
NW_020822366.1	p2	(GT)25	50	3025882	3025931	p2	(GT)25	50
NW_020822366.1	p2	(GT)15	30	3026565	3026594	p2	(GT)15	30
NW_020822366.1	p2	(TG)7	14	3030503	3030516	p2	(TG)7	14
NW_020822366.1	p2	(TG)6	12	3037282	3037293	p2	(TG)6	12
NW_020822366.1	p2	(CT)13	26	3039920	3039945	p2	(CT)13	26
NW_020822366.1	p2	(AC)27	54	3044226	3044279	p2	(AC)27	54
NW_020822366.1	p2	(AC)20	40	3058403	3058442	p2	(AC)20	40
NW_020822366.1	p2	(AC)25	50	3063159	3063208	p2	(AC)25	50
NW_020822366.1	p2	(AC)17	34	3064458	3064491	p2	(AC)17	34
NW_020822366.1	p2	(AC)25	50	3072644	3072693	p2	(AC)25	50
NW_020822366.1	p2	(GT)27	54	3083024	3083077	p2	(GT)27	54
NW_020822366.1	p2	(AC)22	44	3093346	3093389	p2	(AC)22	44
NW_020822366.1	p2	(AC)26	52	3095956	3096007	p2	(AC)26	52
NW_020822366.1	p2	(TG)16	32	3100038	3100069	p2	(TG)16	32
NW_020822366.1	p2	(AG)24	48	3104825	3104872	p2	(AG)24	48
NW_020822366.1	p2	(GA)21	42	3109522	3109563	p2	(GA)21	42
NW_020822366.1	p2	(AC)36	72	3110762	3110833	p2	(AC)36	72
NW_020822366.1	p2	(GT)23	46	3113681	3113726	p2	(GT)23	46
NW_020822366.1	p2	(AC)20	40	3114807	3114846	p2	(AC)20	40
NW_020822366.1	p2	(GT)25	50	3115302	3115351	p2	(GT)25	50
NW_020822366.1	p2	(TG)6	12	3119477	3119488	p2	(TG)6	12
NW_020822366.1	p2	(TG)6	12	3122351	3122362	p2	(TG)6	12
NW_020822366.1	p2	(TC)6	12	3123740	3123751	p2	(TC)6	12
NW_020822366.1	p2	(CA)6	12	3125607	3125618	p2	(CA)6	12
NW_020822366.1	p2	(TG)9	18	3127393	3127410	p2	(TG)9	18
NW_020822366.1	p2	(TG)8	16	3136398	3136413	p2	(TG)8	16
NW_020822366.1	p2	(GT)7	14	3140242	3140255	p2	(GT)7	14
NW_020822366.1	p2	(CA)22	44	3140924	3140967	p2	(CA)22	44
NW_020822366.1	p2	(AC)23	46	3142376	3142421	p2	(AC)23	46
NW_020822366.1	p2	(TG)24	48	3154637	3154684	p2	(TG)24	48
NW_020822366.1	p2	(GT)19	38	3157895	3157932	p2	(GT)19	38
NW_020822366.1	p2	(AC)24	48	3162943	3162990	p2	(AC)24	48
NW_020822366.1	p2	(TG)28	56	3167792	3167847	p2	(TG)28	56
NW_020822366.1	p2	(TG)19	38	3171779	3171816	p2	(TG)19	38
NW_020822366.1	p2	(AC)6	12	3182952	3182963	p2	(AC)6	12
NW_020822366.1	p2	(AC)21	42	3184907	3184948	p2	(AC)21	42
NW_020822366.1	p2	(AC)25	50	3187538	3187587	p2	(AC)25	50
NW_020822366.1	p2	(GT)25	50	3190178	3190227	p2	(GT)25	50
NW_020822366.1	p2	(AC)22	44	3195192	3195235	p2	(AC)22	44
NW_020822366.1	p2	(TG)23	46	3195409	3195454	p2	(TG)23	46
NW_020822366.1	p2	(TG)27	54	3206052	3206105	p2	(TG)27	54
NW_020822366.1	p2	(TG)24	48	3213919	3213966	p2	(TG)24	48
NW_020822366.1	p2	(GT)19	38	3217479	3217516	p2	(GT)19	38
NW_020822366.1	p2	(GA)6	12	3219849	3219860	p2	(GA)6	12
NW_020822366.1	p2	(AG)26	52	3234069	3234120	p2	(AG)26	52
NW_020822366.1	p2	(AC)24	48	3239247	3239294	p2	(AC)24	48
NW_020822366.1	p2	(AC)7	14	3245237	3245250	p2	(AC)7	14
NW_020822366.1	p2	(AC)17	34	3249742	3249775	p2	(AC)17	34
NW_020822366.1	p2	(CA)17	34	3273562	3273595	p2	(CA)17	34
NW_020822366.1	p2	(CA)22	44	3273872	3273915	p2	(CA)22	44
NW_020822366.1	p2	(GT)24	48	3283275	3283322	p2	(GT)24	48
NW_020822366.1	p2	(AC)11	22	3284221	3284242	p2	(AC)11	22
NW_020822366.1	p2	(AC)23	46	3285375	3285420	p2	(AC)23	46
NW_020822366.1	p2	(GT)26	52	3294754	3294805	p2	(GT)26	52
NW_020822366.1	p2	(CA)7	14	3295639	3295652	p2	(CA)7	14
NW_020822366.1	p2	(GT)22	44	3299049	3299092	p2	(GT)22	44
NW_020822366.1	p2	(AC)29	58	3313512	3313569	p2	(AC)29	58
NW_020822366.1	p2	(AC)21	42	3317287	3317328	p2	(AC)21	42
NW_020822366.1	p2	(AC)9	18	3317776	3317793	p2	(AC)9	18
NW_020822366.1	p2	(CA)27	54	3322959	3323012	p2	(CA)27	54
NW_020822366.1	p2	(GT)28	56	3325525	3325580	p2	(GT)28	56
NW_020822366.1	p2	(AC)28	56	3329953	3330008	p2	(AC)28	56
NW_020822366.1	p2	(GT)30	60	3332132	3332191	p2	(GT)30	60
NW_020822366.1	p2	(GT)24	48	3342815	3342862	p2	(GT)24	48
NW_020822366.1	p2	(TC)31	62	3372402	3372463	p2	(TC)31	62
NW_020822366.1	p2	(GT)25	50	3373798	3373847	p2	(GT)25	50
NW_020822366.1	p2	(AC)27	54	3376318	3376371	p2	(AC)27	54
NW_020822366.1	p2	(GT)8	16	3385210	3385225	p2	(GT)8	16
NW_020822366.1	p2	(AG)6	12	3406151	3406162	p2	(AG)6	12
NW_020822366.1	p2	(AC)25	50	3414683	3414732	p2	(AC)25	50
NW_020822366.1	p2	(GT)6	12	3419079	3419090	p2	(GT)6	12
NW_020822366.1	p2	(GT)19	38	3422424	3422461	p2	(GT)19	38
NW_020822366.1	p2	(TG)17	34	3425727	3425760	p2	(TG)17	34
NW_020822366.1	p2	(GT)26	52	3447288	3447339	p2	(GT)26	52
NW_020822366.1	p2	(TG)9	18	3456767	3456784	p2	(TG)9	18
NW_020822366.1	p2	(AC)24	48	3474224	3474271	p2	(AC)24	48
NW_020822366.1	p2	(TG)22	44	3474683	3474726	p2	(TG)22	44
NW_020822366.1	p2	(GT)6	12	3490268	3490279	p2	(GT)6	12
NW_020822366.1	p2	(TG)21	42	3499917	3499958	p2	(TG)21	42
NW_020822366.1	p2	(AC)6	12	3503493	3503504	p2	(AC)6	12
NW_020822366.1	p2	(TC)7	14	3506680	3506693	p2	(TC)7	14
NW_020822366.1	p2	(GT)10	20	3511648	3511667	p2	(GT)10	20
NW_020822366.1	p2	(TA)16	32	3512229	3512260	p2	(TA)16	32
NW_020822366.1	p2	(AC)12	24	3516331	3516354	p2	(AC)12	24
NW_020822366.1	p2	(GC)6	12	3519607	3519618	p2	(GC)6	12
NW_020822366.1	p2	(GT)31	62	3527824	3527885	p2	(GT)31	62
NW_020822366.1	p2	(GT)6	12	3529050	3529061	p2	(GT)6	12
NW_020822366.1	p2	(AG)6	12	3530021	3530032	p2	(AG)6	12
NW_020822366.1	p2	(AC)10	20	3536576	3536595	p2	(AC)10	20
NW_020822366.1	p2	(GT)19	38	3542286	3542323	p2	(GT)19	38
NW_020822366.1	p2	(TA)6	12	3548006	3548017	p2	(TA)6	12
NW_020822366.1	p2	(TG)26	52	3566973	3567024	p2	(TG)26	52
NW_020822366.1	p2	(GT)21	42	3586567	3586608	p2	(GT)21	42
NW_020822366.1	p2	(TG)23	46	3590699	3590744	p2	(TG)23	46
NW_020822366.1	p2	(TG)22	44	3599699	3599742	p2	(TG)22	44
NW_020822366.1	p2	(AG)21	42	3600883	3600924	p2	(AG)21	42
NW_020822366.1	p2	(AC)17	34	3602190	3602223	p2	(AC)17	34
NW_020822366.1	p2	(AC)16	32	3612695	3612726	p2	(AC)16	32
NW_020822366.1	p2	(AT)9	18	3617515	3617532	p2	(AT)9	18
NW_020822366.1	p2	(GT)22	44	3618808	3618851	p2	(GT)22	44
NW_020822366.1	p2	(CT)6	12	3635866	3635877	p2	(CT)6	12
NW_020822366.1	p2	(TG)28	56	3650538	3650593	p2	(TG)28	56
NW_020822366.1	p2	(AC)29	58	3658602	3658659	p2	(AC)29	58
NW_020822366.1	p2	(GT)27	54	3661455	3661508	p2	(GT)27	54
NW_020822366.1	p2	(GT)27	54	3685937	3685990	p2	(GT)27	54
NW_020822366.1	p2	(AC)10	20	3686551	3686570	p2	(AC)10	20
NW_020822366.1	p2	(CT)31	62	3692996	3693057	p2	(CT)31	62
NW_020822366.1	p2	(GT)11	22	3696161	3696182	p2	(GT)11	22
NW_020822366.1	p2	(AC)26	52	3696511	3696562	p2	(AC)26	52
NW_020822366.1	p2	(TG)22	44	3743718	3743761	p2	(TG)22	44
NW_020822366.1	p2	(AC)24	48	3745475	3745522	p2	(AC)24	48
NW_020822366.1	p2	(CT)22	44	3747020	3747063	p2	(CT)22	44
NW_020822366.1	p2	(GA)22	44	3747573	3747616	p2	(GA)22	44
NW_020822366.1	p2	(GT)26	52	3752072	3752123	p2	(GT)26	52
NW_020822366.1	p2	(GT)26	52	3752442	3752493	p2	(GT)26	52
NW_020822366.1	p2	(AC)20	40	3757501	3757540	p2	(AC)20	40
NW_020822366.1	p2	(CA)26	52	3760642	3760693	p2	(CA)26	52
NW_020822366.1	p2	(AC)14	28	3771222	3771249	p2	(AC)14	28
NW_020822366.1	p2	(CA)26	52	3775545	3775596	p2	(CA)26	52
NW_020822366.1	p2	(TG)17	34	3777321	3777354	p2	(TG)17	34
NW_020822366.1	p2	(AT)22	44	3778122	3778165	p2	(AT)22	44
NW_020822366.1	p2	(AC)24	48	3787969	3788016	p2	(AC)24	48
NW_020822366.1	p2	(GT)16	32	3795430	3795461	p2	(GT)16	32
NW_020822366.1	p2	(GT)25	50	3801183	3801232	p2	(GT)25	50
NW_020822366.1	p2	(GT)25	50	3806603	3806652	p2	(GT)25	50
NW_020822366.1	p2	(CT)6	12	3811719	3811730	p2	(CT)6	12
NW_020822366.1	p2	(AG)33	66	3821600	3821665	p2	(AG)33	66
NW_020822366.1	p2	(GT)21	42	3850214	3850255	p2	(GT)21	42
NW_020822366.1	p2	(GT)22	44	3857351	3857394	p2	(GT)22	44
NW_020822366.1	p2	(GT)30	60	3859234	3859293	p2	(GT)30	60
NW_020822366.1	p2	(AC)15	30	3869735	3869764	p2	(AC)15	30
NW_020822366.1	p2	(GA)26	52	3871536	3871587	p2	(GA)26	52
NW_020822366.1	p2	(AC)15	30	3892833	3892862	p2	(AC)15	30
NW_020822366.1	p2	(GA)27	54	3894635	3894688	p2	(GA)27	54
NW_020822366.1	p2	(GT)20	40	3918857	3918896	p2	(GT)20	40
NW_020822366.1	p2	(TG)6	12	3924384	3924395	p2	(TG)6	12
NW_020822366.1	p2	(GT)6	12	3965143	3965154	p2	(GT)6	12
NW_020822366.1	p2	(CA)27	54	3967875	3967928	p2	(CA)27	54
NW_020822366.1	p2	(GT)24	48	3974511	3974558	p2	(GT)24	48
NW_020822366.1	p2	(AT)21	42	3985750	3985791	p2	(AT)21	42
NW_020822366.1	p2	(CA)17	34	3986380	3986413	p2	(CA)17	34
NW_020822366.1	p2	(TG)27	54	3995782	3995835	p2	(TG)27	54
NW_020822366.1	p2	(AC)24	48	3998430	3998477	p2	(AC)24	48
NW_020822366.1	p2	(GT)27	54	4001381	4001434	p2	(GT)27	54
NW_020822366.1	p2	(TG)14	28	4003823	4003850	p2	(TG)14	28
NW_020822366.1	p2	(AC)12	24	4027931	4027954	p2	(AC)12	24
NW_020822366.1	p2	(TG)6	12	4038694	4038705	p2	(TG)6	12
NW_020822366.1	p2	(CA)6	12	4042786	4042797	p2	(CA)6	12
NW_020822366.1	p2	(GA)27	54	4050970	4051023	p2	(GA)27	54
NW_020822366.1	p2	(CA)21	42	4063545	4063586	p2	(CA)21	42
NW_020822366.1	p2	(TG)7	14	4065129	4065142	p2	(TG)7	14
NW_020822366.1	p2	(TG)6	12	4065328	4065339	p2	(TG)6	12
NW_020822366.1	p2	(TG)6	12	4066824	4066835	p2	(TG)6	12
NW_020822366.1	p2	(AG)36	72	4068715	4068786	p2	(AG)36	72
NW_020822366.1	p2	(CA)13	26	4080771	4080796	p2	(CA)13	26
NW_020822366.1	p2	(CA)15	30	4082182	4082211	p2	(CA)15	30
NW_020822366.1	p2	(AC)28	56	4095642	4095697	p2	(AC)28	56
NW_020822366.1	p2	(AC)22	44	4104135	4104178	p2	(AC)22	44
NW_020822366.1	p2	(TC)53	106	4125804	4125909	p2	(TC)53	106
NW_020822366.1	p2	(AC)27	54	4127187	4127240	p2	(AC)27	54
NW_020822366.1	p2	(CT)25	50	4137122	4137171	p2	(CT)25	50
NW_020822366.1	p2	(AG)6	12	4143810	4143821	p2	(AG)6	12
NW_020822366.1	p2	(GT)28	56	4164917	4164972	p2	(GT)28	56
NW_020822366.1	p2	(TG)6	12	4219815	4219826	p2	(TG)6	12
NW_020822366.1	p2	(AC)19	38	4221850	4221887	p2	(AC)19	38
NW_020822366.1	p2	(AT)22	44	4222630	4222673	p2	(AT)22	44
NW_020822366.1	p2	(TG)7	14	4224480	4224493	p2	(TG)7	14
NW_020822366.1	p2	(TA)21	42	4224682	4224723	p2	(TA)21	42
NW_020822366.1	p2	(TC)7	14	4225916	4225929	p2	(TC)7	14
NW_020822366.1	p2	(GT)24	48	4246252	4246299	p2	(GT)24	48
NW_020822366.1	p2	(CA)21	42	4260658	4260699	p2	(CA)21	42
NW_020822366.1	p2	(AG)6	12	4284650	4284661	p2	(AG)6	12
NW_020822366.1	p2	(AC)29	58	4287891	4287948	p2	(AC)29	58
NW_020822366.1	p2	(AT)9	18	4292582	4292599	p2	(AT)9	18
NW_020822366.1	p2	(AT)23	46	4303282	4303327	p2	(AT)23	46
NW_020822366.1	p2	(AC)42	84	4307832	4307915	p2	(AC)42	84
NW_020822366.1	p2	(TA)7	14	4320961	4320974	p2	(TA)7	14
NW_020822366.1	p2	(GT)24	48	4338906	4338953	p2	(GT)24	48
NW_020822366.1	p2	(AT)18	36	4345244	4345279	p2	(AT)18	36
NW_020822366.1	p2	(TG)25	50	4360746	4360795	p2	(TG)25	50
NW_020822366.1	p2	(AT)12	24	4374309	4374332	p2	(AT)12	24
NW_020822366.1	p2	(CT)31	62	4378306	4378367	p2	(CT)31	62
NW_020822366.1	p2	(AC)7	14	4383732	4383745	p2	(AC)7	14
NW_020822366.1	p2	(AT)6	12	4384079	4384090	p2	(AT)6	12
NW_020822366.1	p2	(TC)32	64	4392593	4392656	p2	(TC)32	64
NW_020822366.1	p2	(TG)8	16	4433418	4433433	p2	(TG)8	16
NW_020822366.1	p2	(AG)12	24	4437898	4437921	p2	(AG)12	24
NW_020822366.1	p2	(GA)23	46	4442526	4442571	p2	(GA)23	46
NW_020822366.1	p2	(CA)6	12	4446331	4446342	p2	(CA)6	12
NW_020822366.1	p2	(GT)26	52	4454119	4454170	p2	(GT)26	52
NW_020822366.1	p2	(AC)24	48	4477584	4477631	p2	(AC)24	48
NW_020822366.1	p2	(AG)6	12	4491896	4491907	p2	(AG)6	12
NW_020822366.1	p2	(TA)21	42	4509287	4509328	p2	(TA)21	42
NW_020822366.1	p2	(CA)28	56	4509555	4509610	p2	(CA)28	56
NW_020822366.1	p2	(AC)26	52	4517275	4517326	p2	(AC)26	52
NW_020822366.1	p2	(AT)6	12	4524575	4524586	p2	(AT)6	12
NW_020822366.1	p2	(AG)7	14	4525779	4525792	p2	(AG)7	14
NW_020822366.1	p2	(TA)7	14	4530311	4530324	p2	(TA)7	14
NW_020822366.1	p2	(TC)28	56	4537636	4537691	p2	(TC)28	56
NW_020822366.1	p2	(AT)11	22	4538306	4538327	p2	(AT)11	22
NW_020822366.1	p2	(TA)21	42	4577715	4577756	p2	(TA)21	42
NW_020822366.1	p2	(AG)6	12	4597693	4597704	p2	(AG)6	12
NW_020822366.1	p2	(GA)22	44	4625876	4625919	p2	(GA)22	44
NW_020822366.1	p2	(GT)26	52	4632849	4632900	p2	(GT)26	52
NW_020822366.1	p2	(CA)8	16	4648909	4648924	p2	(CA)8	16
NW_020822366.1	p2	(CT)6	12	4655367	4655378	p2	(CT)6	12
NW_020822366.1	p2	(TG)15	30	4681063	4681092	p2	(TG)15	30
NW_020822366.1	p2	(AC)7	14	4692221	4692234	p2	(AC)7	14
NW_020822366.1	p2	(GT)18	36	4694476	4694511	p2	(GT)18	36
NW_020822366.1	p2	(GT)27	54	4695826	4695879	p2	(GT)27	54
NW_020822366.1	p2	(CT)23	46	4700377	4700422	p2	(CT)23	46
NW_020822366.1	p2	(GT)26	52	4712823	4712874	p2	(GT)26	52
NW_020822366.1	p2	(AC)27	54	4718509	4718562	p2	(AC)27	54
NW_020822366.1	p2	(AC)12	24	4720973	4720996	p2	(AC)12	24
NW_020822366.1	p2	(CA)11	22	4723461	4723482	p2	(CA)11	22
NW_020822366.1	p2	(AC)15	30	4726845	4726874	p2	(AC)15	30
NW_020822366.1	p2	(AC)13	26	4750046	4750071	p2	(AC)13	26
NW_020822366.1	p2	(AT)8	16	4750407	4750422	p2	(AT)8	16
NW_020822366.1	p2	(TG)21	42	4770926	4770967	p2	(TG)21	42
NW_020822366.1	p2	(AT)6	12	4771795	4771806	p2	(AT)6	12
NW_020822366.1	p2	(TG)29	58	4778441	4778498	p2	(TG)29	58
NW_020822366.1	p2	(TG)22	44	4783320	4783363	p2	(TG)22	44
NW_020822366.1	p2	(AT)20	40	4787836	4787875	p2	(AT)20	40
NW_020822366.1	p2	(TG)14	28	4804138	4804165	p2	(TG)14	28
NW_020822366.1	p2	(CA)9	18	4810920	4810937	p2	(CA)9	18
NW_020822366.1	p2	(TG)8	16	4829960	4829975	p2	(TG)8	16
NW_020822366.1	p2	(TC)33	66	4830895	4830960	p2	(TC)33	66
NW_020822366.1	p2	(AC)31	62	4835177	4835238	p2	(AC)31	62
NW_020822366.1	p2	(TG)6	12	4878428	4878439	p2	(TG)6	12
NW_020822366.1	p2	(GT)18	36	4911619	4911654	p2	(GT)18	36
NW_020822366.1	p2	(TA)6	12	4913673	4913684	p2	(TA)6	12
NW_020822366.1	p2	(GT)23	46	4930029	4930074	p2	(GT)23	46
NW_020822366.1	p2	(CT)25	50	4930830	4930879	p2	(CT)25	50
NW_020822366.1	p2	(TG)17	34	4932456	4932489	p2	(TG)17	34
NW_020822366.1	p2	(AC)16	32	4942945	4942976	p2	(AC)16	32
NW_020822366.1	p2	(CA)6	12	4971455	4971466	p2	(CA)6	12
NW_020822366.1	p2	(CA)17	34	4971701	4971734	p2	(CA)17	34
NW_020822366.1	p2	(GT)24	48	4973015	4973062	p2	(GT)24	48
NW_020822366.1	p2	(AC)26	52	4984906	4984957	p2	(AC)26	52
NW_020822366.1	p2	(TG)23	46	4990552	4990597	p2	(TG)23	46
NW_020822366.1	p2	(AG)7	14	4995803	4995816	p2	(AG)7	14
NW_020822366.1	p2	(TC)6	12	5000957	5000968	p2	(TC)6	12
NW_020822366.1	p2	(AC)24	48	5016675	5016722	p2	(AC)24	48
NW_020822366.1	p2	(GA)24	48	5023860	5023907	p2	(GA)24	48
NW_020822366.1	p2	(GT)24	48	5035850	5035897	p2	(GT)24	48
NW_020822366.1	p2	(GA)33	66	5041145	5041210	p2	(GA)33	66
NW_020822366.1	p2	(AC)29	58	5041827	5041884	p2	(AC)29	58
NW_020822366.1	p2	(CT)16	32	5051131	5051162	p2	(CT)16	32
NW_020822366.1	p2	(AC)7	14	5054353	5054366	p2	(AC)7	14
NW_020822366.1	p2	(CA)22	44	5055606	5055649	p2	(CA)22	44
NW_020822366.1	p2	(GT)6	12	5072352	5072363	p2	(GT)6	12
NW_020822366.1	p2	(CA)18	36	5072784	5072819	p2	(CA)18	36
NW_020822366.1	p2	(TG)12	24	5100713	5100736	p2	(TG)12	24
NW_020822366.1	p2	(AT)24	48	5105074	5105121	p2	(AT)24	48
NW_020822366.1	p2	(GT)26	52	5114267	5114318	p2	(GT)26	52
NW_020822366.1	p2	(GT)21	42	5116249	5116290	p2	(GT)21	42
NW_020822366.1	p2	(AC)28	56	5129344	5129399	p2	(AC)28	56
NW_020822366.1	p2	(CA)7	14	5132212	5132225	p2	(CA)7	14
NW_020822366.1	p2	(TG)23	46	5136093	5136138	p2	(TG)23	46
NW_020822366.1	p2	(CT)7	14	5138858	5138871	p2	(CT)7	14
NW_020822366.1	p2	(TG)7	14	5170256	5170269	p2	(TG)7	14
NW_020822366.1	p2	(AG)6	12	5178982	5178993	p2	(AG)6	12
NW_020822366.1	p2	(AC)30	60	5186789	5186848	p2	(AC)30	60
NW_020822366.1	p2	(GT)6	12	5189762	5189773	p2	(GT)6	12
NW_020822366.1	p2	(GT)20	40	5206295	5206334	p2	(GT)20	40
NW_020822366.1	p2	(GT)20	40	5208035	5208074	p2	(GT)20	40
NW_020822366.1	p2	(AG)18	36	5216196	5216231	p2	(AG)18	36
NW_020822366.1	p2	(AC)22	44	5221656	5221699	p2	(AC)22	44
NW_020822366.1	p2	(AC)8	16	5228611	5228626	p2	(AC)8	16
NW_020822366.1	p2	(TG)18	36	5231384	5231419	p2	(TG)18	36
NW_020822366.1	p2	(CA)26	52	5238260	5238311	p2	(CA)26	52
NW_020822366.1	p2	(TC)34	68	5242333	5242400	p2	(TC)34	68
NW_020822366.1	p2	(AC)18	36	5242589	5242624	p2	(AC)18	36
NW_020822366.1	p2	(GT)23	46	5248344	5248389	p2	(GT)23	46
NW_020822366.1	p2	(CA)6	12	5255649	5255660	p2	(CA)6	12
NW_020822366.1	p2	(TG)21	42	5273996	5274037	p2	(TG)21	42
NW_020822366.1	p2	(AG)8	16	5279703	5279718	p2	(AG)8	16
NW_020822366.1	p2	(AG)18	36	5281737	5281772	p2	(AG)18	36
NW_020822366.1	p2	(TG)8	16	5293497	5293512	p2	(TG)8	16
NW_020822366.1	p2	(AC)6	12	5302917	5302928	p2	(AC)6	12
NW_020822366.1	p2	(CT)6	12	5310342	5310353	p2	(CT)6	12
NW_020822366.1	p2	(GA)11	22	5323781	5323802	p2	(GA)11	22
NW_020822366.1	p2	(CT)6	12	5335600	5335611	p2	(CT)6	12
NW_020822366.1	p2	(CA)7	14	5356185	5356198	p2	(CA)7	14
NW_020822366.1	p2	(AC)12	24	5357855	5357878	p2	(AC)12	24
NW_020822366.1	p2	(AC)21	42	5375597	5375638	p2	(AC)21	42
NW_020822366.1	p2	(CA)8	16	5378804	5378819	p2	(CA)8	16
NW_020822366.1	p2	(TC)22	44	5385237	5385280	p2	(TC)22	44
NW_020822366.1	p2	(AC)6	12	5395801	5395812	p2	(AC)6	12
NW_020822366.1	p2	(TG)7	14	5401722	5401735	p2	(TG)7	14
NW_020822366.1	p2	(TG)8	16	5424019	5424034	p2	(TG)8	16
NW_020822366.1	p2	(AC)21	42	5435482	5435523	p2	(AC)21	42
NW_020822366.1	p2	(GA)6	12	5437441	5437452	p2	(GA)6	12
NW_020822366.1	p2	(AG)25	50	5444475	5444524	p2	(AG)25	50
NW_020822366.1	p2	(AC)8	16	5452425	5452440	p2	(AC)8	16
NW_020822366.1	p2	(GA)7	14	5475269	5475282	p2	(GA)7	14
NW_020822366.1	p2	(TC)20	40	5486316	5486355	p2	(TC)20	40
NW_020822366.1	p2	(TG)6	12	5504257	5504268	p2	(TG)6	12
NW_020822366.1	p2	(TC)6	12	5512026	5512037	p2	(TC)6	12
NW_020822366.1	p2	(GT)22	44	5538142	5538185	p2	(GT)22	44
NW_020822366.1	p2	(AC)25	50	5542391	5542440	p2	(AC)25	50
NW_020822366.1	p2	(AC)31	62	5558018	5558079	p2	(AC)31	62
NW_020822366.1	p2	(AG)6	12	5563720	5563731	p2	(AG)6	12
NW_020822366.1	p2	(TG)6	12	5574668	5574679	p2	(TG)6	12
NW_020822366.1	p2	(TG)10	20	5574836	5574855	p2	(TG)10	20
NW_020822366.1	p2	(TG)17	34	5589706	5589739	p2	(TG)17	34
NW_020822366.1	p2	(TG)6	12	5591025	5591036	p2	(TG)6	12
NW_020822366.1	p2	(AC)7	14	5598896	5598909	p2	(AC)7	14
NW_020822366.1	p2	(AT)6	12	5612543	5612554	p2	(AT)6	12
NW_020822366.1	p2	(AG)19	38	5617018	5617055	p2	(AG)19	38
NW_020822366.1	p2	(GT)19	38	5618818	5618855	p2	(GT)19	38
NW_020822366.1	p2	(AC)7	14	5622103	5622116	p2	(AC)7	14
NW_020822366.1	p2	(AC)23	46	5627213	5627258	p2	(AC)23	46
NW_020822366.1	p2	(AC)10	20	5629820	5629839	p2	(AC)10	20
NW_020822366.1	p2	(TG)18	36	5634892	5634927	p2	(TG)18	36
NW_020822366.1	p2	(GA)28	56	5653828	5653883	p2	(GA)28	56
NW_020822366.1	p2	(AC)22	44	5658538	5658581	p2	(AC)22	44
NW_020822366.1	p2	(AC)33	66	5675315	5675380	p2	(AC)33	66
NW_020822366.1	p2	(TA)6	12	5712163	5712174	p2	(TA)6	12
NW_020822366.1	p2	(AC)23	46	5714640	5714685	p2	(AC)23	46
NW_020822366.1	p2	(AC)22	44	5722807	5722850	p2	(AC)22	44
NW_020822366.1	p2	(CT)8	16	5728477	5728492	p2	(CT)8	16
NW_020822366.1	p2	(GT)6	12	5739481	5739492	p2	(GT)6	12
NW_020822366.1	p2	(AC)6	12	5740182	5740193	p2	(AC)6	12
NW_020822366.1	p2	(TA)22	44	5740847	5740890	p2	(TA)22	44
NW_020822366.1	p2	(CT)28	56	5747668	5747723	p2	(CT)28	56
NW_020822366.1	p2	(GA)8	16	5753447	5753462	p2	(GA)8	16
NW_020822366.1	p2	(GT)19	38	5755010	5755047	p2	(GT)19	38
NW_020822366.1	p2	(GT)6	12	5773345	5773356	p2	(GT)6	12
NW_020822366.1	p2	(GA)6	12	5803116	5803127	p2	(GA)6	12
NW_020822366.1	p2	(TC)27	54	5815042	5815095	p2	(TC)27	54
NW_020822366.1	p2	(GA)36	72	5862729	5862800	p2	(GA)36	72
NW_020822366.1	p2	(TG)22	44	5864870	5864913	p2	(TG)22	44
NW_020822366.1	p2	(AC)25	50	5912979	5913028	p2	(AC)25	50
NW_020822366.1	p2	(AG)28	56	5931253	5931308	p2	(AG)28	56
NW_020822366.1	p2	(TG)24	48	5933328	5933375	p2	(TG)24	48
NW_020822366.1	p2	(AC)23	46	6020391	6020436	p2	(AC)23	46
NW_020822366.1	p2	(AC)26	52	6065103	6065154	p2	(AC)26	52
NW_020822366.1	p2	(AC)23	46	6070867	6070912	p2	(AC)23	46
NW_020822366.1	p2	(TA)30	60	6113643	6113702	p2	(TA)30	60
NW_020822366.1	p2	(AC)6	12	6136535	6136546	p2	(AC)6	12
NW_020822366.1	p2	(TC)6	12	6138932	6138943	p2	(TC)6	12
NW_020822366.1	p2	(AC)24	48	6142240	6142287	p2	(AC)24	48
NW_020822366.1	p2	(TC)28	56	6174054	6174109	p2	(TC)28	56
NW_020822366.1	p2	(TA)6	12	6180971	6180982	p2	(TA)6	12
NW_020822366.1	p2	(GA)7	14	6182934	6182947	p2	(GA)7	14
NW_020822366.1	p2	(TA)15	30	6187540	6187569	p2	(TA)15	30
NW_020822366.1	p2	(TG)25	50	6240242	6240291	p2	(TG)25	50
NW_020822366.1	p2	(TG)28	56	6245229	6245284	p2	(TG)28	56
NW_020822366.1	p2	(GT)28	56	6276273	6276328	p2	(GT)28	56
NW_020822366.1	p2	(AT)11	22	6278723	6278744	p2	(AT)11	22
NW_020822366.1	p2	(GA)6	12	6279839	6279850	p2	(GA)6	12
NW_020822366.1	p2	(GT)6	12	6282253	6282264	p2	(GT)6	12
NW_020822366.1	p2	(TC)24	48	6301708	6301755	p2	(TC)24	48
NW_020822366.1	p2	(TG)31	62	6320130	6320191	p2	(TG)31	62
NW_020822366.1	p2	(GT)23	46	6321020	6321065	p2	(GT)23	46
NW_020822366.1	p2	(CA)28	56	6322176	6322231	p2	(CA)28	56
NW_020822366.1	p2	(AT)7	14	6338899	6338912	p2	(AT)7	14
NW_020822366.1	p2	(GT)6	12	6343596	6343607	p2	(GT)6	12
NW_020822366.1	p2	(GT)24	48	6348566	6348613	p2	(GT)24	48
NW_020822366.1	p2	(AT)6	12	6362221	6362232	p2	(AT)6	12
NW_020822366.1	p2	(GT)23	46	6369132	6369177	p2	(GT)23	46
NW_020822366.1	p2	(GA)14	28	6375052	6375079	p2	(GA)14	28
NW_020822366.1	p2	(AC)26	52	6382403	6382454	p2	(AC)26	52
NW_020822366.1	p2	(TG)27	54	6383117	6383170	p2	(TG)27	54
NW_020822366.1	p2	(AT)20	40	6393208	6393247	p2	(AT)20	40
NW_020822366.1	p2	(GT)22	44	6393393	6393436	p2	(GT)22	44
NW_020822366.1	p2	(AT)19	38	6399206	6399243	p2	(AT)19	38
NW_020822366.1	p2	(TG)24	48	6406389	6406436	p2	(TG)24	48
NW_020822366.1	p2	(GT)36	72	6413192	6413263	p2	(GT)36	72
NW_020822366.1	p2	(CA)30	60	6422317	6422376	p2	(CA)30	60
NW_020822366.1	p2	(AC)17	34	6424879	6424912	p2	(AC)17	34
NW_020822366.1	p2	(GT)21	42	6425886	6425927	p2	(GT)21	42
NW_020822366.1	p2	(AC)6	12	6428273	6428284	p2	(AC)6	12
NW_020822366.1	p2	(AC)25	50	6453711	6453760	p2	(AC)25	50
NW_020822366.1	p2	(AC)26	52	6468806	6468857	p2	(AC)26	52
NW_020822366.1	p2	(TA)13	26	6485179	6485204	p2	(TA)13	26
NW_020822366.1	p2	(CA)8	16	6493455	6493470	p2	(CA)8	16
NW_020822366.1	p2	(GT)29	58	6507058	6507115	p2	(GT)29	58
NW_020822366.1	p2	(GA)6	12	6507665	6507676	p2	(GA)6	12
NW_020822366.1	p2	(AC)19	38	6517744	6517781	p2	(AC)19	38
NW_020822366.1	p2	(AC)6	12	6530024	6530035	p2	(AC)6	12
NW_020822366.1	p2	(TG)7	14	6539112	6539125	p2	(TG)7	14
NW_020822366.1	p2	(GT)24	48	6542295	6542342	p2	(GT)24	48
NW_020822366.1	p2	(CT)21	42	6625138	6625179	p2	(CT)21	42
NW_020822366.1	p2	(TG)9	18	6635710	6635727	p2	(TG)9	18
NW_020822366.1	p2	(AT)21	42	6682448	6682489	p2	(AT)21	42
NW_020822366.1	p2	(AC)19	38	6711053	6711090	p2	(AC)19	38
NW_020822366.1	p2	(AG)31	62	6733605	6733666	p2	(AG)31	62
NW_020822366.1	p2	(GA)6	12	6765911	6765922	p2	(GA)6	12
NW_020822366.1	p2	(GA)6	12	6768023	6768034	p2	(GA)6	12
NW_020822366.1	p2	(TG)25	50	6783224	6783273	p2	(TG)25	50
NW_020822366.1	p2	(GT)21	42	6787132	6787173	p2	(GT)21	42
NW_020822366.1	p2	(AC)27	54	6789751	6789804	p2	(AC)27	54
NW_020822366.1	p2	(GT)23	46	6807460	6807505	p2	(GT)23	46
NW_020822366.1	p2	(AT)25	50	6813681	6813730	p2	(AT)25	50
NW_020822366.1	p2	(TC)23	46	6823801	6823846	p2	(TC)23	46
NW_020822366.1	p2	(TG)6	12	6824768	6824779	p2	(TG)6	12
NW_020822366.1	p2	(GT)6	12	6841858	6841869	p2	(GT)6	12
NW_020822366.1	p2	(AC)18	36	6846259	6846294	p2	(AC)18	36
NW_020822366.1	p2	(CA)7	14	6860810	6860823	p2	(CA)7	14
NW_020822366.1	p2	(CA)25	50	6862968	6863017	p2	(CA)25	50
NW_020822366.1	p2	(CA)19	38	6889330	6889367	p2	(CA)19	38
NW_020822366.1	p2	(AC)8	16	6895545	6895560	p2	(AC)8	16
NW_020822366.1	p2	(CA)26	52	6900338	6900389	p2	(CA)26	52
NW_020822366.1	p2	(AG)6	12	6916883	6916894	p2	(AG)6	12
NW_020822366.1	p2	(CT)21	42	6923254	6923295	p2	(CT)21	42
NW_020822366.1	p2	(GT)27	54	6924705	6924758	p2	(GT)27	54
NW_020822366.1	p2	(GA)16	32	6927739	6927770	p2	(GA)16	32
NW_020822366.1	p2	(GT)27	54	6931283	6931336	p2	(GT)27	54
NW_020822366.1	p2	(AT)26	52	6942274	6942325	p2	(AT)26	52
NW_020822366.1	p2	(AC)20	40	6946491	6946530	p2	(AC)20	40
NW_020822366.1	p2	(CT)7	14	6950566	6950579	p2	(CT)7	14
NW_020822366.1	p2	(GA)6	12	6959238	6959249	p2	(GA)6	12
NW_020822366.1	p2	(CA)22	44	6964007	6964050	p2	(CA)22	44
NW_020822366.1	p2	(GT)9	18	6965310	6965327	p2	(GT)9	18
NW_020822366.1	p2	(CA)6	12	6967793	6967804	p2	(CA)6	12
NW_020822366.1	p2	(TC)7	14	6989207	6989220	p2	(TC)7	14
NW_020822366.1	p2	(AT)23	46	7001005	7001050	p2	(AT)23	46
NW_020822366.1	p2	(AC)20	40	7003980	7004019	p2	(AC)20	40
NW_020822366.1	p2	(AT)15	30	7005641	7005670	p2	(AT)15	30
NW_020822366.1	p2	(CA)24	48	7008574	7008621	p2	(CA)24	48
NW_020822366.1	p2	(AG)25	50	7011979	7012028	p2	(AG)25	50
NW_020822366.1	p2	(AC)22	44	7023284	7023327	p2	(AC)22	44
NW_020822366.1	p2	(AC)33	66	7023570	7023635	p2	(AC)33	66
NW_020822366.1	p2	(AC)26	52	7033434	7033485	p2	(AC)26	52
NW_020822366.1	p2	(GT)29	58	7048861	7048918	p2	(GT)29	58
NW_020822366.1	p2	(AC)22	44	7082594	7082637	p2	(AC)22	44
NW_020822367.1	p2	(AT)21	42	9339	9380	p2	(AT)21	42
NW_020822367.1	p2	(AC)28	56	13978	14033	p2	(AC)28	56
NW_020822367.1	p2	(CT)7	14	22812	22825	p2	(CT)7	14
NW_020822367.1	p2	(AT)22	44	23524	23567	p2	(AT)22	44
NW_020822367.1	p2	(AT)18	36	25188	25223	p2	(AT)18	36
NW_020822369.1	p2	(TC)37	74	7135	7208	p2	(TC)37	74
NW_020822369.1	p2	(CA)6	12	14449	14460	p2	(CA)6	12
NW_020822370.1	p2	(AC)23	46	2367	2412	p2	(AC)23	46
NW_020822370.1	p2	(GT)16	32	18127	18158	p2	(GT)16	32
NW_020822370.1	p2	(AC)23	46	33523	33568	p2	(AC)23	46
NW_020822370.1	p2	(CA)15	30	37044	37073	p2	(CA)15	30
NW_020822370.1	p2	(CA)23	46	65999	66044	p2	(CA)23	46
NW_020822370.1	p2	(AC)23	46	66232	66277	p2	(AC)23	46
NW_020822370.1	p2	(AC)23	46	81442	81487	p2	(AC)23	46
NW_020822370.1	p2	(GT)25	50	83913	83962	p2	(GT)25	50
NW_020822370.1	p2	(AC)28	56	93802	93857	p2	(AC)28	56
NW_020822370.1	p2	(TG)26	52	104036	104087	p2	(TG)26	52
NW_020822370.1	p2	(AC)32	64	115678	115741	p2	(AC)32	64
NW_020822370.1	p2	(AC)28	56	157439	157494	p2	(AC)28	56
NW_020822370.1	p2	(GT)27	54	162873	162926	p2	(GT)27	54
NW_020822370.1	p2	(TG)23	46	173090	173135	p2	(TG)23	46
NW_020822370.1	p2	(AC)22	44	182269	182312	p2	(AC)22	44
NW_020822370.1	p2	(AC)21	42	182986	183027	p2	(AC)21	42
NW_020822370.1	p2	(AC)20	40	186523	186562	p2	(AC)20	40
NW_020822370.1	p2	(AC)28	56	208954	209009	p2	(AC)28	56
NW_020822370.1	p2	(GT)24	48	228115	228162	p2	(GT)24	48
NW_020822370.1	p2	(AC)31	62	233656	233717	p2	(AC)31	62
NW_020822370.1	p2	(TG)25	50	248860	248909	p2	(TG)25	50
NW_020822370.1	p2	(TA)7	14	253649	253662	p2	(TA)7	14
NW_020822370.1	p2	(GT)23	46	260719	260764	p2	(GT)23	46
NW_020822370.1	p2	(AC)14	28	261331	261358	p2	(AC)14	28
NW_020822370.1	p2	(AC)27	54	283075	283128	p2	(AC)27	54
NW_020822370.1	p2	(AT)7	14	287115	287128	p2	(AT)7	14
NW_020822370.1	p2	(AC)12	24	291515	291538	p2	(AC)12	24
NW_020822370.1	p2	(AC)14	28	294141	294168	p2	(AC)14	28
NW_020822370.1	p2	(TG)21	42	302372	302413	p2	(TG)21	42
NW_020822370.1	p2	(GT)6	12	311680	311691	p2	(GT)6	12
NW_020822370.1	p2	(TG)7	14	322464	322477	p2	(TG)7	14
NW_020822370.1	p2	(AC)21	42	331641	331682	p2	(AC)21	42
NW_020822370.1	p2	(TG)30	60	345247	345306	p2	(TG)30	60
NW_020822370.1	p2	(CA)6	12	350369	350380	p2	(CA)6	12
NW_020822370.1	p2	(AC)28	56	351527	351582	p2	(AC)28	56
NW_020822370.1	p2	(GT)22	44	355593	355636	p2	(GT)22	44
NW_020822370.1	p2	(GT)6	12	364231	364242	p2	(GT)6	12
NW_020822370.1	p2	(GT)6	12	368022	368033	p2	(GT)6	12
NW_020822370.1	p2	(TG)21	42	375167	375208	p2	(TG)21	42
NW_020822370.1	p2	(CA)7	14	377164	377177	p2	(CA)7	14
NW_020822370.1	p2	(CA)22	44	388940	388983	p2	(CA)22	44
NW_020822370.1	p2	(CA)6	12	394476	394487	p2	(CA)6	12
NW_020822370.1	p2	(AT)22	44	396339	396382	p2	(AT)22	44
NW_020822370.1	p2	(CT)32	64	401124	401187	p2	(CT)32	64
NW_020822370.1	p2	(TG)28	56	403243	403298	p2	(TG)28	56
NW_020822370.1	p2	(TG)36	72	413716	413787	p2	(TG)36	72
NW_020822370.1	p2	(CA)31	62	418767	418828	p2	(CA)31	62
NW_020822370.1	p2	(GT)21	42	419619	419660	p2	(GT)21	42
NW_020822370.1	p2	(CA)32	64	440932	440995	p2	(CA)32	64
NW_020822370.1	p2	(TA)20	40	443578	443617	p2	(TA)20	40
NW_020822370.1	p2	(CT)22	44	456768	456811	p2	(CT)22	44
NW_020822370.1	p2	(TG)11	22	466924	466945	p2	(TG)11	22
NW_020822370.1	p2	(TG)6	12	490379	490390	p2	(TG)6	12
NW_020822370.1	p2	(AC)20	40	504407	504446	p2	(AC)20	40
NW_020822370.1	p2	(TG)20	40	506900	506939	p2	(TG)20	40
NW_020822370.1	p2	(TG)6	12	511454	511465	p2	(TG)6	12
NW_020822370.1	p2	(AG)26	52	513830	513881	p2	(AG)26	52
NW_020822370.1	p2	(GA)33	66	526697	526762	p2	(GA)33	66
NW_020822370.1	p2	(GT)33	66	532754	532819	p2	(GT)33	66
NW_020822370.1	p2	(AT)6	12	533073	533084	p2	(AT)6	12
NW_020822370.1	p2	(AC)23	46	535290	535335	p2	(AC)23	46
NW_020822370.1	p2	(AG)24	48	536574	536621	p2	(AG)24	48
NW_020822370.1	p2	(AT)20	40	537281	537320	p2	(AT)20	40
NW_020822370.1	p2	(CA)6	12	537641	537652	p2	(CA)6	12
NW_020822370.1	p2	(AT)25	50	538443	538492	p2	(AT)25	50
NW_020822370.1	p2	(TG)23	46	551275	551320	p2	(TG)23	46
NW_020822370.1	p2	(AC)20	40	575220	575259	p2	(AC)20	40
NW_020822370.1	p2	(GT)22	44	604825	604868	p2	(GT)22	44
NW_020822370.1	p2	(TC)6	12	610295	610306	p2	(TC)6	12
NW_020822370.1	p2	(AT)14	28	624008	624035	p2	(AT)14	28
NW_020822370.1	p2	(AT)20	40	631153	631192	p2	(AT)20	40
NW_020822370.1	p2	(AC)27	54	632819	632872	p2	(AC)27	54
NW_020822370.1	p2	(AC)24	48	641328	641375	p2	(AC)24	48
NW_020822370.1	p2	(CA)23	46	643625	643670	p2	(CA)23	46
NW_020822370.1	p2	(AC)28	56	658424	658479	p2	(AC)28	56
NW_020822370.1	p2	(AC)20	40	680796	680835	p2	(AC)20	40
NW_020822370.1	p2	(GA)27	54	684794	684847	p2	(GA)27	54
NW_020822370.1	p2	(AC)25	50	708296	708345	p2	(AC)25	50
NW_020822370.1	p2	(CA)23	46	709024	709069	p2	(CA)23	46
NW_020822370.1	p2	(AC)25	50	713363	713412	p2	(AC)25	50
NW_020822370.1	p2	(TG)19	38	730219	730256	p2	(TG)19	38
NW_020822370.1	p2	(AT)8	16	744021	744036	p2	(AT)8	16
NW_020822370.1	p2	(TG)15	30	746139	746168	p2	(TG)15	30
NW_020822370.1	p2	(GT)22	44	752439	752482	p2	(GT)22	44
NW_020822370.1	p2	(AC)29	58	756585	756642	p2	(AC)29	58
NW_020822370.1	p2	(AT)15	30	762022	762051	p2	(AT)15	30
NW_020822370.1	p2	(GA)17	34	769428	769461	p2	(GA)17	34
NW_020822370.1	p2	(AT)18	36	778479	778514	p2	(AT)18	36
NW_020822370.1	p2	(AT)14	28	788327	788354	p2	(AT)14	28
NW_020822370.1	p2	(AC)8	16	794127	794142	p2	(AC)8	16
NW_020822370.1	p2	(TG)27	54	818160	818213	p2	(TG)27	54
NW_020822370.1	p2	(TG)7	14	819504	819517	p2	(TG)7	14
NW_020822370.1	p2	(AT)17	34	827845	827878	p2	(AT)17	34
NW_020822370.1	p2	(TG)24	48	828123	828170	p2	(TG)24	48
NW_020822370.1	p2	(AC)21	42	835055	835096	p2	(AC)21	42
NW_020822370.1	p2	(AT)12	24	837614	837637	p2	(AT)12	24
NW_020822370.1	p2	(AC)24	48	861149	861196	p2	(AC)24	48
NW_020822370.1	p2	(GT)23	46	863767	863812	p2	(GT)23	46
NW_020822370.1	p2	(AC)6	12	870909	870920	p2	(AC)6	12
NW_020822370.1	p2	(GT)11	22	871439	871460	p2	(GT)11	22
NW_020822370.1	p2	(AC)31	62	875597	875658	p2	(AC)31	62
NW_020822370.1	p2	(AT)19	38	919035	919072	p2	(AT)19	38
NW_020822370.1	p2	(CA)23	46	920437	920482	p2	(CA)23	46
NW_020822370.1	p2	(TC)6	12	927078	927089	p2	(TC)6	12
NW_020822370.1	p2	(GT)22	44	927487	927530	p2	(GT)22	44
NW_020822370.1	p2	(GT)23	46	933266	933311	p2	(GT)23	46
NW_020822370.1	p2	(GT)24	48	938239	938286	p2	(GT)24	48
NW_020822370.1	p2	(GT)21	42	939406	939447	p2	(GT)21	42
NW_020822370.1	p2	(GA)23	46	945388	945433	p2	(GA)23	46
NW_020822370.1	p2	(AG)24	48	949434	949481	p2	(AG)24	48
NW_020822370.1	p2	(AC)24	48	957375	957422	p2	(AC)24	48
NW_020822370.1	p2	(GT)10	20	958118	958137	p2	(GT)10	20
NW_020822370.1	p2	(AT)10	20	960833	960852	p2	(AT)10	20
NW_020822370.1	p2	(AC)20	40	962578	962617	p2	(AC)20	40
NW_020822370.1	p2	(AG)21	42	963539	963580	p2	(AG)21	42
NW_020822370.1	p2	(AC)22	44	963856	963899	p2	(AC)22	44
NW_020822370.1	p2	(AC)14	28	974462	974489	p2	(AC)14	28
NW_020822370.1	p2	(AC)35	70	998730	998799	p2	(AC)35	70
NW_020822370.1	p2	(GT)22	44	1016422	1016465	p2	(GT)22	44
NW_020822370.1	p2	(AT)9	18	1025208	1025225	p2	(AT)9	18
NW_020822370.1	p2	(AC)17	34	1025427	1025460	p2	(AC)17	34
NW_020822370.1	p2	(CT)28	56	1033528	1033583	p2	(CT)28	56
NW_020822370.1	p2	(AT)19	38	1054103	1054140	p2	(AT)19	38
NW_020822370.1	p2	(GT)25	50	1055361	1055410	p2	(GT)25	50
NW_020822370.1	p2	(AG)7	14	1066221	1066234	p2	(AG)7	14
NW_020822370.1	p2	(TG)31	62	1068714	1068775	p2	(TG)31	62
NW_020822370.1	p2	(AC)32	64	1072196	1072259	p2	(AC)32	64
NW_020822370.1	p2	(AG)22	44	1085507	1085550	p2	(AG)22	44
NW_020822370.1	p2	(TG)8	16	1086938	1086953	p2	(TG)8	16
NW_020822370.1	p2	(AC)24	48	1104784	1104831	p2	(AC)24	48
NW_020822370.1	p2	(TC)6	12	1117135	1117146	p2	(TC)6	12
NW_020822370.1	p2	(TG)29	58	1122062	1122119	p2	(TG)29	58
NW_020822370.1	p2	(TG)6	12	1132642	1132653	p2	(TG)6	12
NW_020822370.1	p2	(AC)21	42	1148197	1148238	p2	(AC)21	42
NW_020822370.1	p2	(AC)25	50	1154805	1154854	p2	(AC)25	50
NW_020822370.1	p2	(GA)26	52	1163627	1163678	p2	(GA)26	52
NW_020822370.1	p2	(AT)17	34	1181052	1181085	p2	(AT)17	34
NW_020822370.1	p2	(AC)30	60	1207837	1207896	p2	(AC)30	60
NW_020822370.1	p2	(CA)23	46	1217914	1217959	p2	(CA)23	46
NW_020822370.1	p2	(CA)25	50	1223286	1223335	p2	(CA)25	50
NW_020822370.1	p2	(CT)6	12	1227769	1227780	p2	(CT)6	12
NW_020822370.1	p2	(GT)30	60	1239315	1239374	p2	(GT)30	60
NW_020822370.1	p2	(AC)28	56	1249484	1249539	p2	(AC)28	56
NW_020822370.1	p2	(TG)32	64	1255485	1255548	p2	(TG)32	64
NW_020822370.1	p2	(TC)31	62	1256141	1256202	p2	(TC)31	62
NW_020822370.1	p2	(AG)25	50	1259283	1259332	p2	(AG)25	50
NW_020822370.1	p2	(GT)24	48	1261277	1261324	p2	(GT)24	48
NW_020822370.1	p2	(GT)29	58	1269868	1269925	p2	(GT)29	58
NW_020822370.1	p2	(TG)26	52	1283990	1284041	p2	(TG)26	52
NW_020822370.1	p2	(AC)24	48	1286759	1286806	p2	(AC)24	48
NW_020822370.1	p2	(AC)23	46	1289357	1289402	p2	(AC)23	46
NW_020822370.1	p2	(AC)27	54	1293775	1293828	p2	(AC)27	54
NW_020822370.1	p2	(TG)8	16	1308798	1308813	p2	(TG)8	16
NW_020822370.1	p2	(AC)6	12	1315626	1315637	p2	(AC)6	12
NW_020822370.1	p2	(GT)26	52	1315965	1316016	p2	(GT)26	52
NW_020822370.1	p2	(CT)12	24	1319332	1319355	p2	(CT)12	24
NW_020822370.1	p2	(GA)24	48	1326414	1326461	p2	(GA)24	48
NW_020822370.1	p2	(AT)15	30	1332155	1332184	p2	(AT)15	30
NW_020822370.1	p2	(CA)23	46	1342001	1342046	p2	(CA)23	46
NW_020822370.1	p2	(CA)6	12	1347158	1347169	p2	(CA)6	12
NW_020822370.1	p2	(AC)6	12	1349103	1349114	p2	(AC)6	12
NW_020822370.1	p2	(AC)25	50	1358287	1358336	p2	(AC)25	50
NW_020822370.1	p2	(AC)20	40	1376686	1376725	p2	(AC)20	40
NW_020822370.1	p2	(AC)25	50	1386215	1386264	p2	(AC)25	50
NW_020822370.1	p2	(AC)28	56	1394299	1394354	p2	(AC)28	56
NW_020822370.1	p2	(CT)22	44	1397675	1397718	p2	(CT)22	44
NW_020822370.1	p2	(CA)26	52	1408956	1409007	p2	(CA)26	52
NW_020822370.1	p2	(AC)22	44	1410676	1410719	p2	(AC)22	44
NW_020822370.1	p2	(GA)26	52	1424436	1424487	p2	(GA)26	52
NW_020822370.1	p2	(AC)19	38	1425089	1425126	p2	(AC)19	38
NW_020822370.1	p2	(AG)18	36	1426350	1426385	p2	(AG)18	36
NW_020822370.1	p2	(TG)6	12	1435198	1435209	p2	(TG)6	12
NW_020822370.1	p2	(AC)18	36	1444411	1444446	p2	(AC)18	36
NW_020822370.1	p2	(AC)30	60	1447213	1447272	p2	(AC)30	60
NW_020822370.1	p2	(CA)6	12	1451876	1451887	p2	(CA)6	12
NW_020822370.1	p2	(CA)8	16	1455224	1455239	p2	(CA)8	16
NW_020822370.1	p2	(TC)6	12	1463165	1463176	p2	(TC)6	12
NW_020822370.1	p2	(CA)17	34	1464681	1464714	p2	(CA)17	34
NW_020822370.1	p2	(AC)18	36	1519102	1519137	p2	(AC)18	36
NW_020822370.1	p2	(AC)30	60	1547302	1547361	p2	(AC)30	60
NW_020822370.1	p2	(TG)30	60	1555808	1555867	p2	(TG)30	60
NW_020822370.1	p2	(GT)19	38	1577380	1577417	p2	(GT)19	38
NW_020822370.1	p2	(AC)32	64	1583284	1583347	p2	(AC)32	64
NW_020822370.1	p2	(AC)24	48	1590475	1590522	p2	(AC)24	48
NW_020822370.1	p2	(CT)29	58	1591495	1591552	p2	(CT)29	58
NW_020822370.1	p2	(GA)26	52	1604515	1604566	p2	(GA)26	52
NW_020822370.1	p2	(GA)26	52	1608920	1608971	p2	(GA)26	52
NW_020822370.1	p2	(GT)21	42	1630804	1630845	p2	(GT)21	42
NW_020822370.1	p2	(GT)26	52	1632059	1632110	p2	(GT)26	52
NW_020822370.1	p2	(AC)24	48	1640070	1640117	p2	(AC)24	48
NW_020822370.1	p2	(GT)26	52	1645249	1645300	p2	(GT)26	52
NW_020822370.1	p2	(TG)8	16	1657512	1657527	p2	(TG)8	16
NW_020822370.1	p2	(AC)25	50	1670996	1671045	p2	(AC)25	50
NW_020822370.1	p2	(TG)6	12	1681426	1681437	p2	(TG)6	12
NW_020822370.1	p2	(AT)8	16	1682073	1682088	p2	(AT)8	16
NW_020822370.1	p2	(GT)7	14	1699393	1699406	p2	(GT)7	14
NW_020822370.1	p2	(AC)12	24	1711800	1711823	p2	(AC)12	24
NW_020822370.1	p2	(CA)6	12	1716010	1716021	p2	(CA)6	12
NW_020822370.1	p2	(GT)18	36	1724251	1724286	p2	(GT)18	36
NW_020822370.1	p2	(GT)20	40	1726372	1726411	p2	(GT)20	40
NW_020822370.1	p2	(AC)25	50	1735325	1735374	p2	(AC)25	50
NW_020822370.1	p2	(TG)22	44	1739951	1739994	p2	(TG)22	44
NW_020822370.1	p2	(TC)27	54	1744492	1744545	p2	(TC)27	54
NW_020822370.1	p2	(AC)7	14	1749038	1749051	p2	(AC)7	14
NW_020822370.1	p2	(TG)21	42	1754803	1754844	p2	(TG)21	42
NW_020822370.1	p2	(TA)19	38	1758059	1758096	p2	(TA)19	38
NW_020822370.1	p2	(AC)10	20	1763309	1763328	p2	(AC)10	20
NW_020822370.1	p2	(CA)6	12	1765578	1765589	p2	(CA)6	12
NW_020822370.1	p2	(AC)21	42	1773293	1773334	p2	(AC)21	42
NW_020822370.1	p2	(CA)20	40	1776874	1776913	p2	(CA)20	40
NW_020822370.1	p2	(CA)13	26	1785202	1785227	p2	(CA)13	26
NW_020822370.1	p2	(GT)26	52	1794528	1794579	p2	(GT)26	52
NW_020822370.1	p2	(TG)6	12	1810336	1810347	p2	(TG)6	12
NW_020822370.1	p2	(AC)8	16	1824177	1824192	p2	(AC)8	16
NW_020822370.1	p2	(CT)25	50	1827336	1827385	p2	(CT)25	50
NW_020822370.1	p2	(CT)9	18	1843249	1843266	p2	(CT)9	18
NW_020822370.1	p2	(GA)27	54	1851664	1851717	p2	(GA)27	54
NW_020822370.1	p2	(AC)9	18	1855316	1855333	p2	(AC)9	18
NW_020822370.1	p2	(TG)7	14	1856393	1856406	p2	(TG)7	14
NW_020822370.1	p2	(AG)7	14	1860358	1860371	p2	(AG)7	14
NW_020822370.1	p2	(AG)21	42	1870537	1870578	p2	(AG)21	42
NW_020822370.1	p2	(GT)21	42	1883101	1883142	p2	(GT)21	42
NW_020822370.1	p2	(GT)24	48	1895507	1895554	p2	(GT)24	48
NW_020822370.1	p2	(CA)26	52	1896013	1896064	p2	(CA)26	52
NW_020822370.1	p2	(CA)21	42	1904245	1904286	p2	(CA)21	42
NW_020822370.1	p2	(AC)11	22	1904483	1904504	p2	(AC)11	22
NW_020822370.1	p2	(GA)21	42	1907720	1907761	p2	(GA)21	42
NW_020822370.1	p2	(CA)23	46	1919231	1919276	p2	(CA)23	46
NW_020822370.1	p2	(GA)6	12	1921783	1921794	p2	(GA)6	12
NW_020822370.1	p2	(GT)23	46	1922292	1922337	p2	(GT)23	46
NW_020822370.1	p2	(AT)6	12	1930369	1930380	p2	(AT)6	12
NW_020822370.1	p2	(GT)22	44	1930752	1930795	p2	(GT)22	44
NW_020822370.1	p2	(AT)8	16	1932005	1932020	p2	(AT)8	16
NW_020822370.1	p2	(GT)8	16	1951693	1951708	p2	(GT)8	16
NW_020822370.1	p2	(TC)24	48	1952657	1952704	p2	(TC)24	48
NW_020822370.1	p2	(CA)13	26	1959303	1959328	p2	(CA)13	26
NW_020822370.1	p2	(TG)11	22	1964180	1964201	p2	(TG)11	22
NW_020822370.1	p2	(GA)22	44	1974769	1974812	p2	(GA)22	44
NW_020822370.1	p2	(TG)22	44	1986963	1987006	p2	(TG)22	44
NW_020822370.1	p2	(TA)11	22	1997881	1997902	p2	(TA)11	22
NW_020822370.1	p2	(TC)8	16	1998706	1998721	p2	(TC)8	16
NW_020822370.1	p2	(AC)26	52	2011319	2011370	p2	(AC)26	52
NW_020822370.1	p2	(AC)32	64	2015929	2015992	p2	(AC)32	64
NW_020822370.1	p2	(AG)31	62	2024738	2024799	p2	(AG)31	62
NW_020822370.1	p2	(GT)20	40	2030370	2030409	p2	(GT)20	40
NW_020822370.1	p2	(CA)6	12	2038419	2038430	p2	(CA)6	12
NW_020822370.1	p2	(AC)6	12	2041278	2041289	p2	(AC)6	12
NW_020822370.1	p2	(TG)19	38	2041915	2041952	p2	(TG)19	38
NW_020822370.1	p2	(AG)6	12	2047211	2047222	p2	(AG)6	12
NW_020822370.1	p2	(CA)7	14	2048641	2048654	p2	(CA)7	14
NW_020822370.1	p2	(AG)21	42	2052952	2052993	p2	(AG)21	42
NW_020822370.1	p2	(CT)30	60	2092656	2092715	p2	(CT)30	60
NW_020822370.1	p2	(CA)23	46	2093080	2093125	p2	(CA)23	46
NW_020822370.1	p2	(CA)23	46	2096851	2096896	p2	(CA)23	46
NW_020822370.1	p2	(GT)7	14	2110044	2110057	p2	(GT)7	14
NW_020822370.1	p2	(GA)6	12	2114991	2115002	p2	(GA)6	12
NW_020822370.1	p2	(CA)21	42	2120178	2120219	p2	(CA)21	42
NW_020822370.1	p2	(AC)24	48	2126236	2126283	p2	(AC)24	48
NW_020822370.1	p2	(AG)6	12	2134479	2134490	p2	(AG)6	12
NW_020822370.1	p2	(TA)22	44	2139736	2139779	p2	(TA)22	44
NW_020822370.1	p2	(TC)7	14	2140992	2141005	p2	(TC)7	14
NW_020822370.1	p2	(CA)6	12	2143735	2143746	p2	(CA)6	12
NW_020822370.1	p2	(AC)6	12	2152345	2152356	p2	(AC)6	12
NW_020822370.1	p2	(GT)15	30	2153715	2153744	p2	(GT)15	30
NW_020822370.1	p2	(GT)31	62	2161030	2161091	p2	(GT)31	62
NW_020822370.1	p2	(GT)6	12	2162885	2162896	p2	(GT)6	12
NW_020822370.1	p2	(CA)32	64	2167796	2167859	p2	(CA)32	64
NW_020822370.1	p2	(AC)13	26	2168435	2168460	p2	(AC)13	26
NW_020822370.1	p2	(AC)25	50	2178722	2178771	p2	(AC)25	50
NW_020822370.1	p2	(GA)26	52	2187068	2187119	p2	(GA)26	52
NW_020822370.1	p2	(GA)28	56	2188308	2188363	p2	(GA)28	56
NW_020822370.1	p2	(AC)10	20	2194410	2194429	p2	(AC)10	20
NW_020822370.1	p2	(TG)20	40	2196495	2196534	p2	(TG)20	40
NW_020822370.1	p2	(TC)6	12	2201424	2201435	p2	(TC)6	12
NW_020822370.1	p2	(AG)6	12	2204945	2204956	p2	(AG)6	12
NW_020822370.1	p2	(GT)22	44	2208345	2208388	p2	(GT)22	44
NW_020822370.1	p2	(CA)31	62	2208677	2208738	p2	(CA)31	62
NW_020822370.1	p2	(TA)14	28	2222803	2222830	p2	(TA)14	28
NW_020822370.1	p2	(AC)25	50	2245115	2245164	p2	(AC)25	50
NW_020822370.1	p2	(GT)23	46	2252079	2252124	p2	(GT)23	46
NW_020822370.1	p2	(AC)23	46	2252248	2252293	p2	(AC)23	46
NW_020822370.1	p2	(AG)7	14	2275135	2275148	p2	(AG)7	14
NW_020822370.1	p2	(AT)18	36	2275980	2276015	p2	(AT)18	36
NW_020822370.1	p2	(TG)6	12	2302128	2302139	p2	(TG)6	12
NW_020822370.1	p2	(TG)6	12	2325492	2325503	p2	(TG)6	12
NW_020822370.1	p2	(AT)22	44	2342860	2342903	p2	(AT)22	44
NW_020822370.1	p2	(GT)28	56	2347848	2347903	p2	(GT)28	56
NW_020822370.1	p2	(TG)7	14	2348429	2348442	p2	(TG)7	14
NW_020822370.1	p2	(TG)29	58	2354110	2354167	p2	(TG)29	58
NW_020822370.1	p2	(TG)28	56	2371072	2371127	p2	(TG)28	56
NW_020822370.1	p2	(AC)19	38	2377379	2377416	p2	(AC)19	38
NW_020822370.1	p2	(TA)15	30	2383512	2383541	p2	(TA)15	30
NW_020822370.1	p2	(AG)6	12	2383650	2383661	p2	(AG)6	12
NW_020822370.1	p2	(AT)21	42	2383774	2383815	p2	(AT)21	42
NW_020822370.1	p2	(TC)6	12	2384436	2384447	p2	(TC)6	12
NW_020822370.1	p2	(TG)22	44	2412797	2412840	p2	(TG)22	44
NW_020822370.1	p2	(TG)6	12	2414084	2414095	p2	(TG)6	12
NW_020822370.1	p2	(CA)9	18	2416255	2416272	p2	(CA)9	18
NW_020822370.1	p2	(AC)10	20	2416634	2416653	p2	(AC)10	20
NW_020822370.1	p2	(GA)33	66	2419252	2419317	p2	(GA)33	66
NW_020822370.1	p2	(GT)22	44	2423021	2423064	p2	(GT)22	44
NW_020822370.1	p2	(TG)26	52	2434803	2434854	p2	(TG)26	52
NW_020822370.1	p2	(AG)23	46	2436461	2436506	p2	(AG)23	46
NW_020822370.1	p2	(AG)21	42	2441321	2441362	p2	(AG)21	42
NW_020822370.1	p2	(TG)26	52	2443787	2443838	p2	(TG)26	52
NW_020822370.1	p2	(AC)25	50	2446817	2446866	p2	(AC)25	50
NW_020822370.1	p2	(GT)20	40	2447594	2447633	p2	(GT)20	40
NW_020822370.1	p2	(CT)21	42	2449016	2449057	p2	(CT)21	42
NW_020822370.1	p2	(AT)21	42	2450608	2450649	p2	(AT)21	42
NW_020822370.1	p2	(GT)22	44	2458498	2458541	p2	(GT)22	44
NW_020822370.1	p2	(CA)6	12	2462027	2462038	p2	(CA)6	12
NW_020822370.1	p2	(TG)31	62	2463041	2463102	p2	(TG)31	62
NW_020822370.1	p2	(CA)6	12	2463538	2463549	p2	(CA)6	12
NW_020822370.1	p2	(AC)24	48	2465901	2465948	p2	(AC)24	48
NW_020822370.1	p2	(CA)23	46	2473219	2473264	p2	(CA)23	46
NW_020822370.1	p2	(AC)26	52	2477709	2477760	p2	(AC)26	52
NW_020822370.1	p2	(AC)30	60	2479898	2479957	p2	(AC)30	60
NW_020822370.1	p2	(CT)9	18	2484340	2484357	p2	(CT)9	18
NW_020822370.1	p2	(GT)22	44	2495318	2495361	p2	(GT)22	44
NW_020822370.1	p2	(AC)30	60	2502559	2502618	p2	(AC)30	60
NW_020822370.1	p2	(AC)29	58	2511441	2511498	p2	(AC)29	58
NW_020822370.1	p2	(TG)24	48	2520886	2520933	p2	(TG)24	48
NW_020822370.1	p2	(TG)25	50	2526650	2526699	p2	(TG)25	50
NW_020822370.1	p2	(TC)30	60	2526898	2526957	p2	(TC)30	60
NW_020822370.1	p2	(CA)26	52	2527182	2527233	p2	(CA)26	52
NW_020822370.1	p2	(AC)19	38	2537230	2537267	p2	(AC)19	38
NW_020822370.1	p2	(TG)27	54	2540881	2540934	p2	(TG)27	54
NW_020822370.1	p2	(CA)31	62	2541370	2541431	p2	(CA)31	62
NW_020822370.1	p2	(AC)9	18	2547404	2547421	p2	(AC)9	18
NW_020822370.1	p2	(TG)7	14	2547786	2547799	p2	(TG)7	14
NW_020822370.1	p2	(AG)7	14	2550481	2550494	p2	(AG)7	14
NW_020822370.1	p2	(GT)25	50	2561964	2562013	p2	(GT)25	50
NW_020822370.1	p2	(TG)6	12	2565270	2565281	p2	(TG)6	12
NW_020822370.1	p2	(TG)6	12	2570973	2570984	p2	(TG)6	12
NW_020822370.1	p2	(GT)24	48	2574098	2574145	p2	(GT)24	48
NW_020822370.1	p2	(AT)8	16	2580506	2580521	p2	(AT)8	16
NW_020822370.1	p2	(TG)24	48	2583858	2583905	p2	(TG)24	48
NW_020822370.1	p2	(AC)18	36	2587716	2587751	p2	(AC)18	36
NW_020822370.1	p2	(TC)21	42	2592499	2592540	p2	(TC)21	42
NW_020822370.1	p2	(AC)7	14	2597622	2597635	p2	(AC)7	14
NW_020822370.1	p2	(TC)32	64	2602971	2603034	p2	(TC)32	64
NW_020822370.1	p2	(TG)25	50	2603205	2603254	p2	(TG)25	50
NW_020822370.1	p2	(GT)12	24	2603512	2603535	p2	(GT)12	24
NW_020822370.1	p2	(AG)6	12	2616343	2616354	p2	(AG)6	12
NW_020822370.1	p2	(GT)25	50	2618842	2618891	p2	(GT)25	50
NW_020822370.1	p2	(GT)25	50	2634276	2634325	p2	(GT)25	50
NW_020822370.1	p2	(GT)21	42	2639610	2639651	p2	(GT)21	42
NW_020822370.1	p2	(CA)14	28	2640308	2640335	p2	(CA)14	28
NW_020822370.1	p2	(GA)28	56	2642457	2642512	p2	(GA)28	56
NW_020822370.1	p2	(AT)21	42	2644314	2644355	p2	(AT)21	42
NW_020822370.1	p2	(GT)22	44	2653400	2653443	p2	(GT)22	44
NW_020822370.1	p2	(AC)24	48	2658358	2658405	p2	(AC)24	48
NW_020822370.1	p2	(AC)23	46	2661779	2661824	p2	(AC)23	46
NW_020822370.1	p2	(CA)8	16	2663433	2663448	p2	(CA)8	16
NW_020822370.1	p2	(AG)26	52	2668383	2668434	p2	(AG)26	52
NW_020822370.1	p2	(CT)6	12	2678712	2678723	p2	(CT)6	12
NW_020822370.1	p2	(CA)6	12	2685590	2685601	p2	(CA)6	12
NW_020822370.1	p2	(TG)23	46	2694877	2694922	p2	(TG)23	46
NW_020822370.1	p2	(TG)21	42	2700070	2700111	p2	(TG)21	42
NW_020822370.1	p2	(AT)23	46	2702532	2702577	p2	(AT)23	46
NW_020822370.1	p2	(AC)15	30	2712060	2712089	p2	(AC)15	30
NW_020822370.1	p2	(AC)22	44	2716184	2716227	p2	(AC)22	44
NW_020822370.1	p2	(AC)23	46	2750549	2750594	p2	(AC)23	46
NW_020822370.1	p2	(CT)25	50	2763999	2764048	p2	(CT)25	50
NW_020822370.1	p2	(AG)23	46	2799294	2799339	p2	(AG)23	46
NW_020822370.1	p2	(AG)15	30	2820431	2820460	p2	(AG)15	30
NW_020822370.1	p2	(AT)14	28	2848172	2848199	p2	(AT)14	28
NW_020822370.1	p2	(GT)24	48	2858083	2858130	p2	(GT)24	48
NW_020822370.1	p2	(TG)23	46	2866451	2866496	p2	(TG)23	46
NW_020822370.1	p2	(AC)23	46	2870986	2871031	p2	(AC)23	46
NW_020822370.1	p2	(GA)7	14	2876486	2876499	p2	(GA)7	14
NW_020822370.1	p2	(TC)28	56	2891536	2891591	p2	(TC)28	56
NW_020822370.1	p2	(AG)8	16	2896517	2896532	p2	(AG)8	16
NW_020822370.1	p2	(AC)15	30	2897839	2897868	p2	(AC)15	30
NW_020822370.1	p2	(TC)24	48	2898667	2898714	p2	(TC)24	48
NW_020822370.1	p2	(CT)30	60	2904756	2904815	p2	(CT)30	60
NW_020822370.1	p2	(CT)16	32	2908696	2908727	p2	(CT)16	32
NW_020822370.1	p2	(GA)10	20	2915618	2915637	p2	(GA)10	20
NW_020822370.1	p2	(CA)20	40	2922046	2922085	p2	(CA)20	40
NW_020822370.1	p2	(AC)23	46	2922565	2922610	p2	(AC)23	46
NW_020822370.1	p2	(CA)6	12	2923123	2923134	p2	(CA)6	12
NW_020822370.1	p2	(GA)21	42	2925465	2925506	p2	(GA)21	42
NW_020822370.1	p2	(CA)19	38	2926201	2926238	p2	(CA)19	38
NW_020822370.1	p2	(GA)22	44	2944874	2944917	p2	(GA)22	44
NW_020822370.1	p2	(TG)19	38	2949465	2949502	p2	(TG)19	38
NW_020822370.1	p2	(AC)21	42	2949873	2949914	p2	(AC)21	42
NW_020822370.1	p2	(AG)11	22	2954704	2954725	p2	(AG)11	22
NW_020822370.1	p2	(AC)24	48	2955881	2955928	p2	(AC)24	48
NW_020822370.1	p2	(GT)20	40	2978508	2978547	p2	(GT)20	40
NW_020822370.1	p2	(GT)23	46	2979656	2979701	p2	(GT)23	46
NW_020822370.1	p2	(TG)34	68	2989063	2989130	p2	(TG)34	68
NW_020822370.1	p2	(AT)19	38	3003818	3003855	p2	(AT)19	38
NW_020822370.1	p2	(TG)8	16	3008887	3008902	p2	(TG)8	16
NW_020822370.1	p2	(TG)10	20	3013392	3013411	p2	(TG)10	20
NW_020822370.1	p2	(TC)6	12	3022532	3022543	p2	(TC)6	12
NW_020822370.1	p2	(CA)16	32	3036020	3036051	p2	(CA)16	32
NW_020822370.1	p2	(TG)23	46	3042210	3042255	p2	(TG)23	46
NW_020822370.1	p2	(TG)31	62	3047181	3047242	p2	(TG)31	62
NW_020822370.1	p2	(TG)8	16	3052949	3052964	p2	(TG)8	16
NW_020822370.1	p2	(AC)25	50	3062281	3062330	p2	(AC)25	50
NW_020822370.1	p2	(GT)23	46	3064509	3064554	p2	(GT)23	46
NW_020822370.1	p2	(GT)27	54	3081296	3081349	p2	(GT)27	54
NW_020822370.1	p2	(AT)21	42	3083627	3083668	p2	(AT)21	42
NW_020822370.1	p2	(CT)8	16	3089532	3089547	p2	(CT)8	16
NW_020822370.1	p2	(AC)25	50	3094412	3094461	p2	(AC)25	50
NW_020822370.1	p2	(AT)12	24	3099800	3099823	p2	(AT)12	24
NW_020822370.1	p2	(GT)22	44	3100753	3100796	p2	(GT)22	44
NW_020822370.1	p2	(TG)35	70	3104222	3104291	p2	(TG)35	70
NW_020822370.1	p2	(AT)13	26	3121364	3121389	p2	(AT)13	26
NW_020822370.1	p2	(GT)25	50	3122730	3122779	p2	(GT)25	50
NW_020822370.1	p2	(TG)6	12	3125585	3125596	p2	(TG)6	12
NW_020822370.1	p2	(TG)27	54	3133265	3133318	p2	(TG)27	54
NW_020822370.1	p2	(TA)20	40	3133661	3133700	p2	(TA)20	40
NW_020822370.1	p2	(TG)25	50	3165347	3165396	p2	(TG)25	50
NW_020822370.1	p2	(CA)26	52	3172523	3172574	p2	(CA)26	52
NW_020822370.1	p2	(CA)30	60	3179999	3180058	p2	(CA)30	60
NW_020822370.1	p2	(GA)18	36	3181304	3181339	p2	(GA)18	36
NW_020822370.1	p2	(AG)9	18	3183923	3183940	p2	(AG)9	18
NW_020822370.1	p2	(AC)15	30	3190765	3190794	p2	(AC)15	30
NW_020822370.1	p2	(AG)9	18	3191343	3191360	p2	(AG)9	18
NW_020822370.1	p2	(AC)25	50	3192733	3192782	p2	(AC)25	50
NW_020822370.1	p2	(TG)23	46	3199735	3199780	p2	(TG)23	46
NW_020822370.1	p2	(AT)21	42	3201601	3201642	p2	(AT)21	42
NW_020822370.1	p2	(GT)24	48	3206691	3206738	p2	(GT)24	48
NW_020822370.1	p2	(TG)24	48	3209061	3209108	p2	(TG)24	48
NW_020822370.1	p2	(AT)9	18	3214504	3214521	p2	(AT)9	18
NW_020822370.1	p2	(TG)30	60	3220788	3220847	p2	(TG)30	60
NW_020822370.1	p2	(CT)36	72	3221729	3221800	p2	(CT)36	72
NW_020822370.1	p2	(AT)17	34	3223415	3223448	p2	(AT)17	34
NW_020822370.1	p2	(TC)27	54	3227234	3227287	p2	(TC)27	54
NW_020822370.1	p2	(TG)21	42	3240042	3240083	p2	(TG)21	42
NW_020822370.1	p2	(TG)6	12	3261499	3261510	p2	(TG)6	12
NW_020822370.1	p2	(AT)10	20	3261736	3261755	p2	(AT)10	20
NW_020822370.1	p2	(GA)6	12	3278942	3278953	p2	(GA)6	12
NW_020822370.1	p2	(AT)19	38	3294501	3294538	p2	(AT)19	38
NW_020822370.1	p2	(GT)28	56	3312634	3312689	p2	(GT)28	56
NW_020822370.1	p2	(AT)18	36	3314142	3314177	p2	(AT)18	36
NW_020822370.1	p2	(TG)26	52	3334581	3334632	p2	(TG)26	52
NW_020822370.1	p2	(AT)21	42	3334967	3335008	p2	(AT)21	42
NW_020822370.1	p2	(TC)28	56	3338890	3338945	p2	(TC)28	56
NW_020822370.1	p2	(AT)6	12	3344121	3344132	p2	(AT)6	12
NW_020822370.1	p2	(AC)32	64	3348201	3348264	p2	(AC)32	64
NW_020822370.1	p2	(AC)24	48	3352704	3352751	p2	(AC)24	48
NW_020822370.1	p2	(CA)24	48	3354117	3354164	p2	(CA)24	48
NW_020822370.1	p2	(AC)7	14	3354679	3354692	p2	(AC)7	14
NW_020822370.1	p2	(TA)6	12	3370773	3370784	p2	(TA)6	12
NW_020822370.1	p2	(AC)24	48	3371977	3372024	p2	(AC)24	48
NW_020822370.1	p2	(AC)22	44	3386474	3386517	p2	(AC)22	44
NW_020822370.1	p2	(GA)27	54	3404058	3404111	p2	(GA)27	54
NW_020822370.1	p2	(TG)17	34	3409998	3410031	p2	(TG)17	34
NW_020822370.1	p2	(GA)20	40	3411866	3411905	p2	(GA)20	40
NW_020822370.1	p2	(GT)17	34	3422648	3422681	p2	(GT)17	34
NW_020822370.1	p2	(AC)27	54	3425020	3425073	p2	(AC)27	54
NW_020822370.1	p2	(GT)27	54	3426072	3426125	p2	(GT)27	54
NW_020822370.1	p2	(GT)24	48	3431749	3431796	p2	(GT)24	48
NW_020822370.1	p2	(TC)6	12	3432473	3432484	p2	(TC)6	12
NW_020822370.1	p2	(AC)25	50	3433153	3433202	p2	(AC)25	50
NW_020822370.1	p2	(AT)17	34	3433494	3433527	p2	(AT)17	34
NW_020822370.1	p2	(AC)25	50	3433770	3433819	p2	(AC)25	50
NW_020822370.1	p2	(TG)7	14	3441039	3441052	p2	(TG)7	14
NW_020822370.1	p2	(AT)6	12	3462191	3462202	p2	(AT)6	12
NW_020822370.1	p2	(CA)6	12	3467678	3467689	p2	(CA)6	12
NW_020822370.1	p2	(AG)27	54	3469156	3469209	p2	(AG)27	54
NW_020822370.1	p2	(GT)6	12	3481562	3481573	p2	(GT)6	12
NW_020822370.1	p2	(GT)34	68	3484842	3484909	p2	(GT)34	68
NW_020822370.1	p2	(GT)28	56	3494251	3494306	p2	(GT)28	56
NW_020822370.1	p2	(TC)23	46	3499087	3499132	p2	(TC)23	46
NW_020822370.1	p2	(CA)24	48	3503805	3503852	p2	(CA)24	48
NW_020822370.1	p2	(AG)8	16	3505797	3505812	p2	(AG)8	16
NW_020822370.1	p2	(CA)6	12	3508755	3508766	p2	(CA)6	12
NW_020822370.1	p2	(TG)6	12	3516721	3516732	p2	(TG)6	12
NW_020822370.1	p2	(GT)16	32	3533526	3533557	p2	(GT)16	32
NW_020822370.1	p2	(TG)24	48	3540098	3540145	p2	(TG)24	48
NW_020822370.1	p2	(GT)12	24	3542207	3542230	p2	(GT)12	24
NW_020822370.1	p2	(GT)6	12	3544459	3544470	p2	(GT)6	12
NW_020822370.1	p2	(TG)29	58	3548811	3548868	p2	(TG)29	58
NW_020822370.1	p2	(AC)18	36	3563536	3563571	p2	(AC)18	36
NW_020822370.1	p2	(TG)19	38	3570392	3570429	p2	(TG)19	38
NW_020822370.1	p2	(AC)31	62	3572967	3573028	p2	(AC)31	62
NW_020822370.1	p2	(AC)25	50	3595943	3595992	p2	(AC)25	50
NW_020822370.1	p2	(AC)19	38	3605076	3605113	p2	(AC)19	38
NW_020822370.1	p2	(AC)27	54	3611829	3611882	p2	(AC)27	54
NW_020822370.1	p2	(TA)18	36	3634330	3634365	p2	(TA)18	36
NW_020822370.1	p2	(AC)14	28	3638923	3638950	p2	(AC)14	28
NW_020822370.1	p2	(AG)27	54	3641215	3641268	p2	(AG)27	54
NW_020822370.1	p2	(CA)25	50	3644228	3644277	p2	(CA)25	50
NW_020822370.1	p2	(GT)27	54	3645367	3645420	p2	(GT)27	54
NW_020822370.1	p2	(TG)25	50	3668786	3668835	p2	(TG)25	50
NW_020822370.1	p2	(GT)20	40	3682457	3682496	p2	(GT)20	40
NW_020822370.1	p2	(AC)19	38	3694974	3695011	p2	(AC)19	38
NW_020822370.1	p2	(TC)38	76	3701518	3701593	p2	(TC)38	76
NW_020822370.1	p2	(AC)23	46	3704069	3704114	p2	(AC)23	46
NW_020822370.1	p2	(AG)6	12	3704867	3704878	p2	(AG)6	12
NW_020822370.1	p2	(AC)15	30	3714400	3714429	p2	(AC)15	30
NW_020822370.1	p2	(AT)18	36	3716287	3716322	p2	(AT)18	36
NW_020822370.1	p2	(GT)26	52	3728494	3728545	p2	(GT)26	52
NW_020822370.1	p2	(CA)25	50	3746337	3746386	p2	(CA)25	50
NW_020822370.1	p2	(AT)23	46	3760313	3760358	p2	(AT)23	46
NW_020822370.1	p2	(AC)21	42	3765012	3765053	p2	(AC)21	42
NW_020822370.1	p2	(GA)6	12	3776868	3776879	p2	(GA)6	12
NW_020822370.1	p2	(GT)25	50	3785574	3785623	p2	(GT)25	50
NW_020822370.1	p2	(CA)23	46	3792016	3792061	p2	(CA)23	46
NW_020822370.1	p2	(TC)7	14	3796760	3796773	p2	(TC)7	14
NW_020822370.1	p2	(GT)28	56	3807392	3807447	p2	(GT)28	56
NW_020822370.1	p2	(AG)23	46	3856443	3856488	p2	(AG)23	46
NW_020822370.1	p2	(GT)20	40	3857549	3857588	p2	(GT)20	40
NW_020822370.1	p2	(TG)7	14	3859166	3859179	p2	(TG)7	14
NW_020822370.1	p2	(TG)29	58	3867196	3867253	p2	(TG)29	58
NW_020822370.1	p2	(CA)6	12	3873544	3873555	p2	(CA)6	12
NW_020822370.1	p2	(GT)23	46	3878023	3878068	p2	(GT)23	46
NW_020822370.1	p2	(TG)24	48	3879731	3879778	p2	(TG)24	48
NW_020822370.1	p2	(AC)20	40	3884783	3884822	p2	(AC)20	40
NW_020822370.1	p2	(TG)20	40	3903315	3903354	p2	(TG)20	40
NW_020822370.1	p2	(CT)6	12	3904494	3904505	p2	(CT)6	12
NW_020822370.1	p2	(TG)24	48	3911821	3911868	p2	(TG)24	48
NW_020822370.1	p2	(GT)21	42	3913281	3913322	p2	(GT)21	42
NW_020822370.1	p2	(CA)6	12	3920338	3920349	p2	(CA)6	12
NW_020822370.1	p2	(AC)24	48	3921624	3921671	p2	(AC)24	48
NW_020822370.1	p2	(AC)25	50	3931019	3931068	p2	(AC)25	50
NW_020822370.1	p2	(TC)6	12	3938790	3938801	p2	(TC)6	12
NW_020822370.1	p2	(GT)25	50	3943787	3943836	p2	(GT)25	50
NW_020822370.1	p2	(TG)6	12	3948558	3948569	p2	(TG)6	12
NW_020822370.1	p2	(AC)18	36	3950479	3950514	p2	(AC)18	36
NW_020822370.1	p2	(CA)16	32	3952338	3952369	p2	(CA)16	32
NW_020822370.1	p2	(AC)13	26	3953139	3953164	p2	(AC)13	26
NW_020822370.1	p2	(CT)6	12	3966015	3966026	p2	(CT)6	12
NW_020822370.1	p2	(TG)11	22	3967173	3967194	p2	(TG)11	22
NW_020822370.1	p2	(AC)20	40	3972340	3972379	p2	(AC)20	40
NW_020822370.1	p2	(TC)8	16	3982621	3982636	p2	(TC)8	16
NW_020822370.1	p2	(TG)7	14	3983864	3983877	p2	(TG)7	14
NW_020822370.1	p2	(AC)26	52	4015672	4015723	p2	(AC)26	52
NW_020822370.1	p2	(CA)34	68	4046003	4046070	p2	(CA)34	68
NW_020822370.1	p2	(AC)7	14	4057907	4057920	p2	(AC)7	14
NW_020822370.1	p2	(GT)16	32	4061622	4061653	p2	(GT)16	32
NW_020822370.1	p2	(CA)7	14	4069298	4069311	p2	(CA)7	14
NW_020822370.1	p2	(TA)20	40	4070425	4070464	p2	(TA)20	40
NW_020822370.1	p2	(AT)21	42	4074602	4074643	p2	(AT)21	42
NW_020822370.1	p2	(AG)23	46	4076409	4076454	p2	(AG)23	46
NW_020822370.1	p2	(GT)22	44	4088118	4088161	p2	(GT)22	44
NW_020822370.1	p2	(AC)25	50	4090057	4090106	p2	(AC)25	50
NW_020822370.1	p2	(AT)11	22	4096346	4096367	p2	(AT)11	22
NW_020822370.1	p2	(GT)25	50	4103414	4103463	p2	(GT)25	50
NW_020822370.1	p2	(GA)7	14	4113051	4113064	p2	(GA)7	14
NW_020822370.1	p2	(CA)26	52	4122266	4122317	p2	(CA)26	52
NW_020822370.1	p2	(AC)31	62	4130625	4130686	p2	(AC)31	62
NW_020822370.1	p2	(CT)31	62	4133880	4133941	p2	(CT)31	62
NW_020822370.1	p2	(TA)6	12	4134606	4134617	p2	(TA)6	12
NW_020822370.1	p2	(GT)22	44	4150050	4150093	p2	(GT)22	44
NW_020822370.1	p2	(CA)6	12	4150652	4150663	p2	(CA)6	12
NW_020822370.1	p2	(AT)16	32	4160305	4160336	p2	(AT)16	32
NW_020822370.1	p2	(TG)28	56	4161721	4161776	p2	(TG)28	56
NW_020822370.1	p2	(AC)25	50	4164758	4164807	p2	(AC)25	50
NW_020822370.1	p2	(CA)26	52	4165136	4165187	p2	(CA)26	52
NW_020822370.1	p2	(TG)18	36	4179344	4179379	p2	(TG)18	36
NW_020822370.1	p2	(TA)15	30	4179481	4179510	p2	(TA)15	30
NW_020822370.1	p2	(CA)28	56	4199982	4200037	p2	(CA)28	56
NW_020822370.1	p2	(TG)20	40	4201408	4201447	p2	(TG)20	40
NW_020822370.1	p2	(GT)32	64	4217556	4217619	p2	(GT)32	64
NW_020822370.1	p2	(AG)23	46	4219712	4219757	p2	(AG)23	46
NW_020822370.1	p2	(TG)6	12	4226832	4226843	p2	(TG)6	12
NW_020822370.1	p2	(GT)21	42	4235392	4235433	p2	(GT)21	42
NW_020822370.1	p2	(AC)24	48	4238415	4238462	p2	(AC)24	48
NW_020822370.1	p2	(AT)7	14	4275651	4275664	p2	(AT)7	14
NW_020822370.1	p2	(AC)24	48	4284755	4284802	p2	(AC)24	48
NW_020822370.1	p2	(AC)20	40	4285450	4285489	p2	(AC)20	40
NW_020822370.1	p2	(AC)28	56	4290504	4290559	p2	(AC)28	56
NW_020822370.1	p2	(AT)17	34	4313260	4313293	p2	(AT)17	34
NW_020822370.1	p2	(AC)19	38	4319998	4320035	p2	(AC)19	38
NW_020822370.1	p2	(AC)30	60	4323364	4323423	p2	(AC)30	60
NW_020822370.1	p2	(AC)15	30	4332991	4333020	p2	(AC)15	30
NW_020822370.1	p2	(CA)7	14	4337932	4337945	p2	(CA)7	14
NW_020822370.1	p2	(GT)14	28	4341977	4342004	p2	(GT)14	28
NW_020822370.1	p2	(AC)19	38	4349765	4349802	p2	(AC)19	38
NW_020822370.1	p2	(AC)8	16	4353310	4353325	p2	(AC)8	16
NW_020822370.1	p2	(AC)19	38	4353611	4353648	p2	(AC)19	38
NW_020822370.1	p2	(AC)32	64	4361519	4361582	p2	(AC)32	64
NW_020822370.1	p2	(TC)27	54	4361791	4361844	p2	(TC)27	54
NW_020822370.1	p2	(TG)7	14	4363764	4363777	p2	(TG)7	14
NW_020822370.1	p2	(GT)21	42	4368602	4368643	p2	(GT)21	42
NW_020822370.1	p2	(AC)24	48	4370933	4370980	p2	(AC)24	48
NW_020822370.1	p2	(AC)19	38	4387804	4387841	p2	(AC)19	38
NW_020822370.1	p2	(GT)23	46	4410318	4410363	p2	(GT)23	46
NW_020822370.1	p2	(CA)8	16	4418079	4418094	p2	(CA)8	16
NW_020822370.1	p2	(AG)13	26	4418563	4418588	p2	(AG)13	26
NW_020822370.1	p2	(GT)26	52	4421905	4421956	p2	(GT)26	52
NW_020822370.1	p2	(AC)21	42	4424085	4424126	p2	(AC)21	42
NW_020822370.1	p2	(CA)26	52	4425955	4426006	p2	(CA)26	52
NW_020822370.1	p2	(AC)24	48	4437403	4437450	p2	(AC)24	48
NW_020822370.1	p2	(TG)24	48	4448426	4448473	p2	(TG)24	48
NW_020822370.1	p2	(TG)6	12	4457845	4457856	p2	(TG)6	12
NW_020822370.1	p2	(AC)26	52	4465358	4465409	p2	(AC)26	52
NW_020822370.1	p2	(TG)6	12	4466595	4466606	p2	(TG)6	12
NW_020822370.1	p2	(TA)21	42	4471313	4471354	p2	(TA)21	42
NW_020822370.1	p2	(CA)15	30	4472312	4472341	p2	(CA)15	30
NW_020822370.1	p2	(AC)14	28	4476851	4476878	p2	(AC)14	28
NW_020822370.1	p2	(GT)18	36	4480706	4480741	p2	(GT)18	36
NW_020822370.1	p2	(TC)6	12	4494973	4494984	p2	(TC)6	12
NW_020822370.1	p2	(GT)6	12	4500825	4500836	p2	(GT)6	12
NW_020822370.1	p2	(TC)8	16	4513674	4513689	p2	(TC)8	16
NW_020822370.1	p2	(CA)6	12	4523806	4523817	p2	(CA)6	12
NW_020822370.1	p2	(TG)26	52	4524484	4524535	p2	(TG)26	52
NW_020822370.1	p2	(GT)24	48	4535213	4535260	p2	(GT)24	48
NW_020822370.1	p2	(AC)27	54	4535676	4535729	p2	(AC)27	54
NW_020822370.1	p2	(TG)27	54	4542310	4542363	p2	(TG)27	54
NW_020822370.1	p2	(CA)23	46	4555495	4555540	p2	(CA)23	46
NW_020822370.1	p2	(AG)10	20	4556836	4556855	p2	(AG)10	20
NW_020822370.1	p2	(CA)7	14	4570584	4570597	p2	(CA)7	14
NW_020822370.1	p2	(AG)28	56	4573080	4573135	p2	(AG)28	56
NW_020822370.1	p2	(GT)23	46	4573630	4573675	p2	(GT)23	46
NW_020822370.1	p2	(TG)18	36	4596562	4596597	p2	(TG)18	36
NW_020822370.1	p2	(TG)27	54	4624114	4624167	p2	(TG)27	54
NW_020822370.1	p2	(TA)16	32	4626492	4626523	p2	(TA)16	32
NW_020822370.1	p2	(CA)6	12	4641489	4641500	p2	(CA)6	12
NW_020822370.1	p2	(CA)6	12	4652425	4652436	p2	(CA)6	12
NW_020822370.1	p2	(CA)39	78	4666443	4666520	p2	(CA)39	78
NW_020822370.1	p2	(GT)26	52	4671087	4671138	p2	(GT)26	52
NW_020822370.1	p2	(AG)6	12	4682101	4682112	p2	(AG)6	12
NW_020822370.1	p2	(AC)24	48	4682316	4682363	p2	(AC)24	48
NW_020822370.1	p2	(AC)22	44	4686608	4686651	p2	(AC)22	44
NW_020822370.1	p2	(CT)18	36	4688237	4688272	p2	(CT)18	36
NW_020822370.1	p2	(AG)6	12	4694856	4694867	p2	(AG)6	12
NW_020822370.1	p2	(CT)35	70	4696484	4696553	p2	(CT)35	70
NW_020822370.1	p2	(GT)20	40	4699459	4699498	p2	(GT)20	40
NW_020822370.1	p2	(CA)27	54	4705909	4705962	p2	(CA)27	54
NW_020822370.1	p2	(CA)24	48	4726637	4726684	p2	(CA)24	48
NW_020822370.1	p2	(CA)26	52	4728093	4728144	p2	(CA)26	52
NW_020822370.1	p2	(AG)6	12	4728557	4728568	p2	(AG)6	12
NW_020822370.1	p2	(AC)24	48	4739025	4739072	p2	(AC)24	48
NW_020822370.1	p2	(AC)22	44	4756807	4756850	p2	(AC)22	44
NW_020822370.1	p2	(TG)23	46	4763201	4763246	p2	(TG)23	46
NW_020822370.1	p2	(TG)6	12	4770479	4770490	p2	(TG)6	12
NW_020822370.1	p2	(AC)24	48	4775973	4776020	p2	(AC)24	48
NW_020822370.1	p2	(AC)23	46	4798107	4798152	p2	(AC)23	46
NW_020822370.1	p2	(GT)24	48	4799253	4799300	p2	(GT)24	48
NW_020822370.1	p2	(CT)19	38	4801668	4801705	p2	(CT)19	38
NW_020822370.1	p2	(GT)27	54	4813230	4813283	p2	(GT)27	54
NW_020822370.1	p2	(AC)22	44	4822010	4822053	p2	(AC)22	44
NW_020822370.1	p2	(TG)7	14	4823196	4823209	p2	(TG)7	14
NW_020822370.1	p2	(AC)24	48	4840773	4840820	p2	(AC)24	48
NW_020822370.1	p2	(TC)30	60	4844490	4844549	p2	(TC)30	60
NW_020822370.1	p2	(TC)8	16	4849286	4849301	p2	(TC)8	16
NW_020822370.1	p2	(GA)10	20	4856377	4856396	p2	(GA)10	20
NW_020822370.1	p2	(GT)26	52	4859150	4859201	p2	(GT)26	52
NW_020822370.1	p2	(CA)19	38	4865273	4865310	p2	(CA)19	38
NW_020822370.1	p2	(CT)30	60	4874496	4874555	p2	(CT)30	60
NW_020822370.1	p2	(GT)13	26	4882438	4882463	p2	(GT)13	26
NW_020822370.1	p2	(GT)7	14	4886454	4886467	p2	(GT)7	14
NW_020822370.1	p2	(GT)13	26	4900801	4900826	p2	(GT)13	26
NW_020822370.1	p2	(TC)16	32	4945711	4945742	p2	(TC)16	32
NW_020822370.1	p2	(GA)36	72	4947845	4947916	p2	(GA)36	72
NW_020822370.1	p2	(CA)8	16	4966010	4966025	p2	(CA)8	16
NW_020822370.1	p2	(CA)6	12	4968688	4968699	p2	(CA)6	12
NW_020822370.1	p2	(GT)27	54	4973042	4973095	p2	(GT)27	54
NW_020822370.1	p2	(AC)17	34	4996617	4996650	p2	(AC)17	34
NW_020822370.1	p2	(AC)6	12	5002744	5002755	p2	(AC)6	12
NW_020822370.1	p2	(CA)24	48	5006394	5006441	p2	(CA)24	48
NW_020822370.1	p2	(GT)24	48	5034239	5034286	p2	(GT)24	48
NW_020822370.1	p2	(GT)17	34	5061018	5061051	p2	(GT)17	34
NW_020822370.1	p2	(TC)6	12	5069911	5069922	p2	(TC)6	12
NW_020822370.1	p2	(CA)23	46	5072818	5072863	p2	(CA)23	46
NW_020822370.1	p2	(GT)21	42	5073324	5073365	p2	(GT)21	42
NW_020822370.1	p2	(GT)25	50	5075216	5075265	p2	(GT)25	50
NW_020822370.1	p2	(CA)21	42	5089844	5089885	p2	(CA)21	42
NW_020822370.1	p2	(TG)17	34	5099343	5099376	p2	(TG)17	34
NW_020822370.1	p2	(AC)25	50	5111135	5111184	p2	(AC)25	50
NW_020822370.1	p2	(AT)23	46	5111906	5111951	p2	(AT)23	46
NW_020822370.1	p2	(TG)21	42	5115975	5116016	p2	(TG)21	42
NW_020822370.1	p2	(CT)26	52	5117554	5117605	p2	(CT)26	52
NW_020822370.1	p2	(CA)27	54	5141982	5142035	p2	(CA)27	54
NW_020822370.1	p2	(AC)13	26	5151177	5151202	p2	(AC)13	26
NW_020822370.1	p2	(AC)17	34	5158566	5158599	p2	(AC)17	34
NW_020822370.1	p2	(AG)38	76	5160798	5160873	p2	(AG)38	76
NW_020822370.1	p2	(GA)17	34	5163864	5163897	p2	(GA)17	34
NW_020822370.1	p2	(GT)23	46	5166394	5166439	p2	(GT)23	46
NW_020822370.1	p2	(TG)17	34	5171874	5171907	p2	(TG)17	34
NW_020822370.1	p2	(GT)21	42	5175191	5175232	p2	(GT)21	42
NW_020822370.1	p2	(AC)18	36	5216222	5216257	p2	(AC)18	36
NW_020822370.1	p2	(AG)23	46	5219451	5219496	p2	(AG)23	46
NW_020822370.1	p2	(CA)25	50	5221540	5221589	p2	(CA)25	50
NW_020822370.1	p2	(GA)15	30	5226696	5226725	p2	(GA)15	30
NW_020822370.1	p2	(CT)7	14	5240761	5240774	p2	(CT)7	14
NW_020822370.1	p2	(CA)9	18	5256398	5256415	p2	(CA)9	18
NW_020822370.1	p2	(AC)18	36	5259346	5259381	p2	(AC)18	36
NW_020822370.1	p2	(CA)32	64	5260272	5260335	p2	(CA)32	64
NW_020822370.1	p2	(AG)6	12	5271210	5271221	p2	(AG)6	12
NW_020822370.1	p2	(GT)22	44	5271984	5272027	p2	(GT)22	44
NW_020822370.1	p2	(CA)22	44	5274778	5274821	p2	(CA)22	44
NW_020822370.1	p2	(CA)9	18	5279250	5279267	p2	(CA)9	18
NW_020822370.1	p2	(CA)11	22	5286643	5286664	p2	(CA)11	22
NW_020822370.1	p2	(CA)23	46	5289860	5289905	p2	(CA)23	46
NW_020822370.1	p2	(GA)29	58	5295966	5296023	p2	(GA)29	58
NW_020822370.1	p2	(TG)24	48	5300657	5300704	p2	(TG)24	48
NW_020822370.1	p2	(TC)8	16	5302748	5302763	p2	(TC)8	16
NW_020822370.1	p2	(AC)25	50	5314173	5314222	p2	(AC)25	50
NW_020822370.1	p2	(CA)20	40	5320356	5320395	p2	(CA)20	40
NW_020822370.1	p2	(CA)19	38	5324916	5324953	p2	(CA)19	38
NW_020822370.1	p2	(GA)6	12	5328043	5328054	p2	(GA)6	12
NW_020822370.1	p2	(TG)24	48	5337023	5337070	p2	(TG)24	48
NW_020822370.1	p2	(AT)6	12	5340109	5340120	p2	(AT)6	12
NW_020822370.1	p2	(AC)33	66	5362463	5362528	p2	(AC)33	66
NW_020822370.1	p2	(AC)19	38	5368074	5368111	p2	(AC)19	38
NW_020822370.1	p2	(CA)9	18	5375299	5375316	p2	(CA)9	18
NW_020822370.1	p2	(AG)9	18	5384672	5384689	p2	(AG)9	18
NW_020822370.1	p2	(TG)14	28	5389175	5389202	p2	(TG)14	28
NW_020822370.1	p2	(CA)7	14	5396870	5396883	p2	(CA)7	14
NW_020822370.1	p2	(GT)24	48	5409554	5409601	p2	(GT)24	48
NW_020822370.1	p2	(TG)7	14	5419295	5419308	p2	(TG)7	14
NW_020822370.1	p2	(TA)7	14	5430595	5430608	p2	(TA)7	14
NW_020822370.1	p2	(CA)30	60	5441702	5441761	p2	(CA)30	60
NW_020822370.1	p2	(GT)7	14	5454735	5454748	p2	(GT)7	14
NW_020822370.1	p2	(TG)9	18	5462658	5462675	p2	(TG)9	18
NW_020822370.1	p2	(AC)14	28	5463267	5463294	p2	(AC)14	28
NW_020822370.1	p2	(GT)22	44	5471152	5471195	p2	(GT)22	44
NW_020822370.1	p2	(AC)10	20	5477272	5477291	p2	(AC)10	20
NW_020822370.1	p2	(AC)23	46	5485094	5485139	p2	(AC)23	46
NW_020822370.1	p2	(CA)29	58	5487034	5487091	p2	(CA)29	58
NW_020822370.1	p2	(TC)10	20	5488774	5488793	p2	(TC)10	20
NW_020822370.1	p2	(TG)24	48	5497038	5497085	p2	(TG)24	48
NW_020822370.1	p2	(TA)6	12	5497418	5497429	p2	(TA)6	12
NW_020822370.1	p2	(AG)23	46	5497844	5497889	p2	(AG)23	46
NW_020822370.1	p2	(AC)17	34	5512454	5512487	p2	(AC)17	34
NW_020822370.1	p2	(GT)6	12	5513626	5513637	p2	(GT)6	12
NW_020822370.1	p2	(AT)7	14	5522788	5522801	p2	(AT)7	14
NW_020822370.1	p2	(GT)34	68	5535931	5535998	p2	(GT)34	68
NW_020822370.1	p2	(TG)25	50	5537719	5537768	p2	(TG)25	50
NW_020822370.1	p2	(GT)27	54	5537981	5538034	p2	(GT)27	54
NW_020822370.1	p2	(TG)7	14	5550452	5550465	p2	(TG)7	14
NW_020822370.1	p2	(GT)15	30	5551376	5551405	p2	(GT)15	30
NW_020822370.1	p2	(CA)26	52	5555190	5555241	p2	(CA)26	52
NW_020822370.1	p2	(GT)7	14	5555680	5555693	p2	(GT)7	14
NW_020822370.1	p2	(TG)30	60	5556824	5556883	p2	(TG)30	60
NW_020822370.1	p2	(GT)18	36	5572557	5572592	p2	(GT)18	36
NW_020822370.1	p2	(GT)24	48	5575101	5575148	p2	(GT)24	48
NW_020822370.1	p2	(TG)10	20	5581645	5581664	p2	(TG)10	20
NW_020822370.1	p2	(AG)30	60	5588635	5588694	p2	(AG)30	60
NW_020822370.1	p2	(GT)7	14	5590873	5590886	p2	(GT)7	14
NW_020822370.1	p2	(CA)7	14	5591140	5591153	p2	(CA)7	14
NW_020822370.1	p2	(TG)26	52	5617645	5617696	p2	(TG)26	52
NW_020822370.1	p2	(AC)28	56	5649282	5649337	p2	(AC)28	56
NW_020822370.1	p2	(GT)6	12	5650073	5650084	p2	(GT)6	12
NW_020822370.1	p2	(TG)6	12	5650189	5650200	p2	(TG)6	12
NW_020822370.1	p2	(AC)28	56	5659900	5659955	p2	(AC)28	56
NW_020822370.1	p2	(AC)27	54	5667314	5667367	p2	(AC)27	54
NW_020822370.1	p2	(GT)7	14	5669159	5669172	p2	(GT)7	14
NW_020822370.1	p2	(AC)30	60	5674983	5675042	p2	(AC)30	60
NW_020822370.1	p2	(GT)22	44	5677762	5677805	p2	(GT)22	44
NW_020822370.1	p2	(AC)24	48	5679588	5679635	p2	(AC)24	48
NW_020822370.1	p2	(AC)23	46	5702125	5702170	p2	(AC)23	46
NW_020822370.1	p2	(TC)24	48	5711187	5711234	p2	(TC)24	48
NW_020822370.1	p2	(GT)26	52	5722444	5722495	p2	(GT)26	52
NW_020822370.1	p2	(CA)22	44	5722730	5722773	p2	(CA)22	44
NW_020822370.1	p2	(GT)12	24	5725795	5725818	p2	(GT)12	24
NW_020822370.1	p2	(GT)41	82	5741514	5741595	p2	(GT)41	82
NW_020822370.1	p2	(GT)6	12	5746701	5746712	p2	(GT)6	12
NW_020822370.1	p2	(TG)19	38	5762186	5762223	p2	(TG)19	38
NW_020822370.1	p2	(CT)8	16	5764094	5764109	p2	(CT)8	16
NW_020822370.1	p2	(GT)14	28	5764956	5764983	p2	(GT)14	28
NW_020822370.1	p2	(AC)20	40	5779549	5779588	p2	(AC)20	40
NW_020822370.1	p2	(GT)24	48	5786101	5786148	p2	(GT)24	48
NW_020822370.1	p2	(CT)19	38	5797535	5797572	p2	(CT)19	38
NW_020822370.1	p2	(AC)26	52	5802931	5802982	p2	(AC)26	52
NW_020822370.1	p2	(AC)23	46	5813593	5813638	p2	(AC)23	46
NW_020822370.1	p2	(TG)16	32	5817294	5817325	p2	(TG)16	32
NW_020822370.1	p2	(AG)7	14	5822558	5822571	p2	(AG)7	14
NW_020822370.1	p2	(GT)24	48	5828582	5828629	p2	(GT)24	48
NW_020822370.1	p2	(TG)6	12	5837442	5837453	p2	(TG)6	12
NW_020822370.1	p2	(GT)25	50	5842250	5842299	p2	(GT)25	50
NW_020822370.1	p2	(AC)20	40	5860114	5860153	p2	(AC)20	40
NW_020822370.1	p2	(GT)24	48	5866770	5866817	p2	(GT)24	48
NW_020822370.1	p2	(TG)6	12	5872026	5872037	p2	(TG)6	12
NW_020822370.1	p2	(TC)23	46	5876891	5876936	p2	(TC)23	46
NW_020822370.1	p2	(TG)6	12	5888257	5888268	p2	(TG)6	12
NW_020822370.1	p2	(AG)18	36	5889996	5890031	p2	(AG)18	36
NW_020822370.1	p2	(GT)6	12	5902091	5902102	p2	(GT)6	12
NW_020822370.1	p2	(CA)6	12	5909488	5909499	p2	(CA)6	12
NW_020822370.1	p2	(TC)6	12	5918836	5918847	p2	(TC)6	12
NW_020822370.1	p2	(CA)27	54	5955798	5955851	p2	(CA)27	54
NW_020822370.1	p2	(GT)8	16	5960190	5960205	p2	(GT)8	16
NW_020822370.1	p2	(CA)7	14	5962950	5962963	p2	(CA)7	14
NW_020822370.1	p2	(TG)30	60	5965576	5965635	p2	(TG)30	60
NW_020822370.1	p2	(GT)6	12	5965861	5965872	p2	(GT)6	12
NW_020822370.1	p2	(GT)22	44	5971524	5971567	p2	(GT)22	44
NW_020822370.1	p2	(GT)23	46	5972786	5972831	p2	(GT)23	46
NW_020822370.1	p2	(GT)17	34	5979587	5979620	p2	(GT)17	34
NW_020822370.1	p2	(TC)22	44	5982869	5982912	p2	(TC)22	44
NW_020822370.1	p2	(AC)30	60	6011279	6011338	p2	(AC)30	60
NW_020822370.1	p2	(AC)25	50	6015395	6015444	p2	(AC)25	50
NW_020822370.1	p2	(GT)23	46	6020569	6020614	p2	(GT)23	46
NW_020822370.1	p2	(AC)25	50	6039125	6039174	p2	(AC)25	50
NW_020822370.1	p2	(TA)23	46	6043714	6043759	p2	(TA)23	46
NW_020822370.1	p2	(GA)28	56	6050602	6050657	p2	(GA)28	56
NW_020822370.1	p2	(GA)6	12	6056175	6056186	p2	(GA)6	12
NW_020822370.1	p2	(GT)22	44	6072705	6072748	p2	(GT)22	44
NW_020822370.1	p2	(AC)23	46	6091919	6091964	p2	(AC)23	46
NW_020822370.1	p2	(AT)6	12	6117897	6117908	p2	(AT)6	12
NW_020822370.1	p2	(TG)23	46	6139509	6139554	p2	(TG)23	46
NW_020822370.1	p2	(TG)12	24	6149916	6149939	p2	(TG)12	24
NW_020822370.1	p2	(GT)24	48	6159123	6159170	p2	(GT)24	48
NW_020822370.1	p2	(GT)20	40	6159275	6159314	p2	(GT)20	40
NW_020822370.1	p2	(GT)23	46	6165597	6165642	p2	(GT)23	46
NW_020822370.1	p2	(AC)9	18	6188692	6188709	p2	(AC)9	18
NW_020822370.1	p2	(GT)27	54	6201934	6201987	p2	(GT)27	54
NW_020822370.1	p2	(CA)6	12	6204130	6204141	p2	(CA)6	12
NW_020822370.1	p2	(TG)21	42	6242415	6242456	p2	(TG)21	42
NW_020822370.1	p2	(TG)14	28	6256675	6256702	p2	(TG)14	28
NW_020822370.1	p2	(TG)22	44	6259042	6259085	p2	(TG)22	44
NW_020822370.1	p2	(TC)6	12	6277031	6277042	p2	(TC)6	12
NW_020822370.1	p2	(GT)6	12	6278018	6278029	p2	(GT)6	12
NW_020822370.1	p2	(TG)20	40	6279794	6279833	p2	(TG)20	40
NW_020822370.1	p2	(GT)33	66	6287026	6287091	p2	(GT)33	66
NW_020822370.1	p2	(GT)6	12	6289011	6289022	p2	(GT)6	12
NW_020822370.1	p2	(CA)6	12	6290211	6290222	p2	(CA)6	12
NW_020822370.1	p2	(GT)23	46	6294356	6294401	p2	(GT)23	46
NW_020822370.1	p2	(AC)15	30	6307048	6307077	p2	(AC)15	30
NW_020822370.1	p2	(AC)23	46	6318298	6318343	p2	(AC)23	46
NW_020822370.1	p2	(AC)26	52	6322342	6322393	p2	(AC)26	52
NW_020822370.1	p2	(TC)25	50	6335332	6335381	p2	(TC)25	50
NW_020822370.1	p2	(GT)19	38	6337173	6337210	p2	(GT)19	38
NW_020822370.1	p2	(GT)8	16	6345330	6345345	p2	(GT)8	16
NW_020822370.1	p2	(AT)6	12	6377773	6377784	p2	(AT)6	12
NW_020822370.1	p2	(TC)6	12	6399123	6399134	p2	(TC)6	12
NW_020822370.1	p2	(TA)6	12	6419136	6419147	p2	(TA)6	12
NW_020822370.1	p2	(CA)7	14	6422703	6422716	p2	(CA)7	14
NW_020822370.1	p2	(AC)25	50	6428449	6428498	p2	(AC)25	50
NW_020822370.1	p2	(GT)29	58	6430836	6430893	p2	(GT)29	58
NW_020822370.1	p2	(GT)27	54	6431063	6431116	p2	(GT)27	54
NW_020822370.1	p2	(GT)6	12	6432398	6432409	p2	(GT)6	12
NW_020822370.1	p2	(CA)20	40	6433696	6433735	p2	(CA)20	40
NW_020822370.1	p2	(AT)7	14	6440429	6440442	p2	(AT)7	14
NW_020822370.1	p2	(TA)23	46	6458858	6458903	p2	(TA)23	46
NW_020822370.1	p2	(TA)10	20	6466080	6466099	p2	(TA)10	20
NW_020822370.1	p2	(GT)21	42	6476182	6476223	p2	(GT)21	42
NW_020822370.1	p2	(GT)30	60	6485487	6485546	p2	(GT)30	60
NW_020822370.1	p2	(GT)6	12	6489199	6489210	p2	(GT)6	12
NW_020822370.1	p2	(AC)6	12	6494685	6494696	p2	(AC)6	12
NW_020822370.1	p2	(CA)8	16	6498052	6498067	p2	(CA)8	16
NW_020822370.1	p2	(AT)20	40	6498785	6498824	p2	(AT)20	40
NW_020822370.1	p2	(TG)17	34	6533707	6533740	p2	(TG)17	34
NW_020822370.1	p2	(CA)18	36	6537753	6537788	p2	(CA)18	36
NW_020822370.1	p2	(GT)16	32	6538565	6538596	p2	(GT)16	32
NW_020822370.1	p2	(TG)18	36	6552715	6552750	p2	(TG)18	36
NW_020822370.1	p2	(AG)7	14	6564285	6564298	p2	(AG)7	14
NW_020822370.1	p2	(CA)7	14	6574822	6574835	p2	(CA)7	14
NW_020822370.1	p2	(TA)6	12	6588647	6588658	p2	(TA)6	12
NW_020822370.1	p2	(AT)20	40	6619971	6620010	p2	(AT)20	40
NW_020822370.1	p2	(TG)6	12	6637718	6637729	p2	(TG)6	12
NW_020822370.1	p2	(CT)6	12	6641899	6641910	p2	(CT)6	12
NW_020822370.1	p2	(AT)13	26	6644394	6644419	p2	(AT)13	26
NW_020822370.1	p2	(AG)26	52	6646560	6646611	p2	(AG)26	52
NW_020822370.1	p2	(CA)19	38	6649002	6649039	p2	(CA)19	38
NW_020822370.1	p2	(AC)17	34	6660941	6660974	p2	(AC)17	34
NW_020822370.1	p2	(AC)7	14	6666037	6666050	p2	(AC)7	14
NW_020822370.1	p2	(AG)6	12	6678601	6678612	p2	(AG)6	12
NW_020822370.1	p2	(CT)26	52	6682906	6682957	p2	(CT)26	52
NW_020822370.1	p2	(AT)21	42	6684082	6684123	p2	(AT)21	42
NW_020822370.1	p2	(AC)15	30	6708864	6708893	p2	(AC)15	30
NW_020822370.1	p2	(TC)29	58	6713900	6713957	p2	(TC)29	58
NW_020822370.1	p2	(GT)31	62	6728248	6728309	p2	(GT)31	62
NW_020822370.1	p2	(TA)10	20	6728929	6728948	p2	(TA)10	20
NW_020822370.1	p2	(CA)6	12	6732769	6732780	p2	(CA)6	12
NW_020822370.1	p2	(CT)40	80	6743506	6743585	p2	(CT)40	80
NW_020822370.1	p2	(GT)26	52	6753340	6753391	p2	(GT)26	52
NW_020822370.1	p2	(AC)22	44	6765898	6765941	p2	(AC)22	44
NW_020822370.1	p2	(TG)31	62	6766217	6766278	p2	(TG)31	62
NW_020822370.1	p2	(TC)6	12	6782939	6782950	p2	(TC)6	12
NW_020822370.1	p2	(CA)7	14	6783993	6784006	p2	(CA)7	14
NW_020822370.1	p2	(CA)21	42	6793545	6793586	p2	(CA)21	42
NW_020822370.1	p2	(CA)24	48	6806181	6806228	p2	(CA)24	48
NW_020822370.1	p2	(AG)26	52	6813008	6813059	p2	(AG)26	52
NW_020822370.1	p2	(TG)31	62	6820296	6820357	p2	(TG)31	62
NW_020822370.1	p2	(CA)8	16	6821824	6821839	p2	(CA)8	16
NW_020822370.1	p2	(AC)17	34	6832537	6832570	p2	(AC)17	34
NW_020822370.1	p2	(AC)7	14	6833182	6833195	p2	(AC)7	14
NW_020822370.1	p2	(TC)24	48	6841112	6841159	p2	(TC)24	48
NW_020822370.1	p2	(TG)9	18	6849473	6849490	p2	(TG)9	18
NW_020822370.1	p2	(AC)7	14	6887742	6887755	p2	(AC)7	14
NW_020822370.1	p2	(TG)7	14	6921066	6921079	p2	(TG)7	14
NW_020822370.1	p2	(AC)6	12	6924231	6924242	p2	(AC)6	12
NW_020822370.1	p2	(TC)39	78	6941948	6942025	p2	(TC)39	78
NW_020822370.1	p2	(CA)20	40	6968453	6968492	p2	(CA)20	40
NW_020822370.1	p2	(GT)22	44	6976634	6976677	p2	(GT)22	44
NW_020822370.1	p2	(TG)15	30	7004137	7004166	p2	(TG)15	30
NW_020822370.1	p2	(AC)11	22	7011249	7011270	p2	(AC)11	22
NW_020822370.1	p2	(TC)6	12	7020749	7020760	p2	(TC)6	12
NW_020822370.1	p2	(TC)6	12	7030816	7030827	p2	(TC)6	12
NW_020822370.1	p2	(AC)30	60	7041722	7041781	p2	(AC)30	60
NW_020822370.1	p2	(GT)28	56	7054069	7054124	p2	(GT)28	56
NW_020822370.1	p2	(TA)10	20	7060081	7060100	p2	(TA)10	20
NW_020822370.1	p2	(TG)25	50	7061723	7061772	p2	(TG)25	50
NW_020822370.1	p2	(GT)11	22	7061956	7061977	p2	(GT)11	22
NW_020822370.1	p2	(AC)26	52	7082096	7082147	p2	(AC)26	52
NW_020822370.1	p2	(TG)6	12	7113132	7113143	p2	(TG)6	12
NW_020822370.1	p2	(GT)15	30	7118122	7118151	p2	(GT)15	30
NW_020822370.1	p2	(GA)24	48	7155894	7155941	p2	(GA)24	48
NW_020822370.1	p2	(AC)20	40	7165651	7165690	p2	(AC)20	40
NW_020822370.1	p2	(AC)22	44	7204447	7204490	p2	(AC)22	44
NW_020822370.1	p2	(GT)23	46	7205548	7205593	p2	(GT)23	46
NW_020822370.1	p2	(AT)10	20	7207935	7207954	p2	(AT)10	20
NW_020822370.1	p2	(GT)31	62	7211607	7211668	p2	(GT)31	62
NW_020822370.1	p2	(AT)22	44	7219212	7219255	p2	(AT)22	44
NW_020822370.1	p2	(GT)24	48	7231732	7231779	p2	(GT)24	48
NW_020822370.1	p2	(AC)32	64	7234789	7234852	p2	(AC)32	64
NW_020822370.1	p2	(GT)23	46	7236472	7236517	p2	(GT)23	46
NW_020822370.1	p2	(GT)35	70	7279081	7279150	p2	(GT)35	70
NW_020822370.1	p2	(CA)29	58	7288115	7288172	p2	(CA)29	58
NW_020822370.1	p2	(TG)22	44	7297797	7297840	p2	(TG)22	44
NW_020822370.1	p2	(GT)26	52	7299049	7299100	p2	(GT)26	52
NW_020822370.1	p2	(AC)24	48	7299571	7299618	p2	(AC)24	48
NW_020822370.1	p2	(TG)6	12	7301002	7301013	p2	(TG)6	12
NW_020822370.1	p2	(CA)6	12	7301653	7301664	p2	(CA)6	12
NW_020822370.1	p2	(GT)24	48	7302164	7302211	p2	(GT)24	48
NW_020822370.1	p2	(AC)7	14	7330019	7330032	p2	(AC)7	14
NW_020822370.1	p2	(AC)17	34	7335156	7335189	p2	(AC)17	34
NW_020822370.1	p2	(CA)49	98	7341969	7342066	p2	(CA)49	98
NW_020822370.1	p2	(CA)6	12	7345878	7345889	p2	(CA)6	12
NW_020822370.1	p2	(GA)9	18	7378185	7378202	p2	(GA)9	18
NW_020822370.1	p2	(GA)6	12	7379909	7379920	p2	(GA)6	12
NW_020822370.1	p2	(AT)14	28	7389800	7389827	p2	(AT)14	28
NW_020822370.1	p2	(GT)18	36	7404932	7404967	p2	(GT)18	36
NW_020822370.1	p2	(TG)26	52	7408456	7408507	p2	(TG)26	52
NW_020822370.1	p2	(TG)23	46	7412470	7412515	p2	(TG)23	46
NW_020822370.1	p2	(TG)23	46	7435024	7435069	p2	(TG)23	46
NW_020822370.1	p2	(TG)6	12	7442627	7442638	p2	(TG)6	12
NW_020822370.1	p2	(TG)8	16	7447778	7447793	p2	(TG)8	16
NW_020822370.1	p2	(GT)28	56	7463299	7463354	p2	(GT)28	56
NW_020822370.1	p2	(AT)6	12	7475455	7475466	p2	(AT)6	12
NW_020822370.1	p2	(AC)26	52	7476387	7476438	p2	(AC)26	52
NW_020822370.1	p2	(CA)7	14	7478938	7478951	p2	(CA)7	14
NW_020822370.1	p2	(CT)6	12	7479126	7479137	p2	(CT)6	12
NW_020822370.1	p2	(AC)25	50	7492754	7492803	p2	(AC)25	50
NW_020822370.1	p2	(GT)21	42	7499746	7499787	p2	(GT)21	42
NW_020822370.1	p2	(GA)25	50	7502702	7502751	p2	(GA)25	50
NW_020822370.1	p2	(TG)6	12	7513301	7513312	p2	(TG)6	12
NW_020822370.1	p2	(TC)7	14	7525792	7525805	p2	(TC)7	14
NW_020822370.1	p2	(TG)7	14	7597397	7597410	p2	(TG)7	14
NW_020822370.1	p2	(TC)36	72	7610054	7610125	p2	(TC)36	72
NW_020822370.1	p2	(GT)21	42	7614588	7614629	p2	(GT)21	42
NW_020822370.1	p2	(AC)21	42	7617754	7617795	p2	(AC)21	42
NW_020822370.1	p2	(AC)23	46	7629077	7629122	p2	(AC)23	46
NW_020822370.1	p2	(TG)22	44	7632068	7632111	p2	(TG)22	44
NW_020822370.1	p2	(CA)34	68	7639028	7639095	p2	(CA)34	68
NW_020822370.1	p2	(GT)34	68	7641694	7641761	p2	(GT)34	68
NW_020822370.1	p2	(AC)17	34	7652353	7652386	p2	(AC)17	34
NW_020822370.1	p2	(GA)7	14	7667072	7667085	p2	(GA)7	14
NW_020822370.1	p2	(AC)26	52	7672138	7672189	p2	(AC)26	52
NW_020822370.1	p2	(TC)23	46	7673910	7673955	p2	(TC)23	46
NW_020822370.1	p2	(AC)22	44	7681483	7681526	p2	(AC)22	44
NW_020822370.1	p2	(CA)20	40	7689054	7689093	p2	(CA)20	40
NW_020822370.1	p2	(GT)31	62	7699810	7699871	p2	(GT)31	62
NW_020822370.1	p2	(TG)24	48	7702109	7702156	p2	(TG)24	48
NW_020822370.1	p2	(TG)17	34	7705433	7705466	p2	(TG)17	34
NW_020822370.1	p2	(GT)29	58	7707727	7707784	p2	(GT)29	58
NW_020822370.1	p2	(AT)19	38	7713960	7713997	p2	(AT)19	38
NW_020822370.1	p2	(GT)8	16	7731862	7731877	p2	(GT)8	16
NW_020822370.1	p2	(AT)6	12	7735094	7735105	p2	(AT)6	12
NW_020822370.1	p2	(TG)14	28	7737927	7737954	p2	(TG)14	28
NW_020822370.1	p2	(GT)10	20	7740014	7740033	p2	(GT)10	20
NW_020822370.1	p2	(CA)6	12	7745956	7745967	p2	(CA)6	12
NW_020822370.1	p2	(TG)7	14	7751230	7751243	p2	(TG)7	14
NW_020822370.1	p2	(AC)16	32	7757767	7757798	p2	(AC)16	32
NW_020822370.1	p2	(CA)23	46	7765419	7765464	p2	(CA)23	46
NW_020822370.1	p2	(AT)6	12	7767065	7767076	p2	(AT)6	12
NW_020822370.1	p2	(TC)15	30	7769286	7769315	p2	(TC)15	30
NW_020822370.1	p2	(TG)8	16	7770293	7770308	p2	(TG)8	16
NW_020822370.1	p2	(AT)19	38	7775431	7775468	p2	(AT)19	38
NW_020822370.1	p2	(TC)6	12	7775570	7775581	p2	(TC)6	12
NW_020822370.1	p2	(TG)7	14	7779200	7779213	p2	(TG)7	14
NW_020822370.1	p2	(CA)7	14	7779337	7779350	p2	(CA)7	14
NW_020822370.1	p2	(AG)6	12	7779951	7779962	p2	(AG)6	12
NW_020822370.1	p2	(TG)18	36	7782013	7782048	p2	(TG)18	36
NW_020822370.1	p2	(CA)29	58	7782904	7782961	p2	(CA)29	58
NW_020822370.1	p2	(AC)6	12	7785422	7785433	p2	(AC)6	12
NW_020822370.1	p2	(AT)23	46	7788600	7788645	p2	(AT)23	46
NW_020822370.1	p2	(GT)7	14	7798272	7798285	p2	(GT)7	14
NW_020822370.1	p2	(TC)6	12	7807160	7807171	p2	(TC)6	12
NW_020822370.1	p2	(AC)28	56	7816318	7816373	p2	(AC)28	56
NW_020822370.1	p2	(AT)27	54	7819989	7820042	p2	(AT)27	54
NW_020822370.1	p2	(AC)29	58	7837801	7837858	p2	(AC)29	58
NW_020822370.1	p2	(TA)7	14	7839505	7839518	p2	(TA)7	14
NW_020822370.1	p2	(AC)28	56	7843575	7843630	p2	(AC)28	56
NW_020822370.1	p2	(AC)24	48	7851887	7851934	p2	(AC)24	48
NW_020822370.1	p2	(GT)24	48	7857183	7857230	p2	(GT)24	48
NW_020822370.1	p2	(CA)25	50	7857622	7857671	p2	(CA)25	50
NW_020822370.1	p2	(AC)7	14	7858561	7858574	p2	(AC)7	14
NW_020822370.1	p2	(AC)23	46	7860732	7860777	p2	(AC)23	46
NW_020822370.1	p2	(AC)19	38	7865416	7865453	p2	(AC)19	38
NW_020822370.1	p2	(CT)6	12	7866284	7866295	p2	(CT)6	12
NW_020822370.1	p2	(GT)29	58	7881335	7881392	p2	(GT)29	58
NW_020822370.1	p2	(GT)17	34	7885824	7885857	p2	(GT)17	34
NW_020822370.1	p2	(AC)24	48	7888749	7888796	p2	(AC)24	48
NW_020822370.1	p2	(TA)7	14	7891141	7891154	p2	(TA)7	14
NW_020822370.1	p2	(AT)26	52	7891757	7891808	p2	(AT)26	52
NW_020822370.1	p2	(CA)16	32	7899317	7899348	p2	(CA)16	32
NW_020822370.1	p2	(CA)15	30	7902266	7902295	p2	(CA)15	30
NW_020822370.1	p2	(TG)10	20	7909714	7909733	p2	(TG)10	20
NW_020822370.1	p2	(AT)21	42	7911507	7911548	p2	(AT)21	42
NW_020822370.1	p2	(AC)6	12	7918771	7918782	p2	(AC)6	12
NW_020822370.1	p2	(AC)21	42	7923508	7923549	p2	(AC)21	42
NW_020822370.1	p2	(CA)6	12	7924491	7924502	p2	(CA)6	12
NW_020822370.1	p2	(TG)27	54	7928437	7928490	p2	(TG)27	54
NW_020822370.1	p2	(AC)23	46	7930687	7930732	p2	(AC)23	46
NW_020822370.1	p2	(AC)21	42	7949786	7949827	p2	(AC)21	42
NW_020822370.1	p2	(GT)28	56	7953122	7953177	p2	(GT)28	56
NW_020822370.1	p2	(TG)25	50	7956672	7956721	p2	(TG)25	50
NW_020822370.1	p2	(GA)27	54	7969920	7969973	p2	(GA)27	54
NW_020822370.1	p2	(CA)16	32	7973381	7973412	p2	(CA)16	32
NW_020822370.1	p2	(GA)15	30	7984528	7984557	p2	(GA)15	30
NW_020822370.1	p2	(CA)17	34	7986439	7986472	p2	(CA)17	34
NW_020822370.1	p2	(AG)15	30	7992740	7992769	p2	(AG)15	30
NW_020822370.1	p2	(CA)6	12	7997304	7997315	p2	(CA)6	12
NW_020822370.1	p2	(TG)7	14	7999517	7999530	p2	(TG)7	14
NW_020822370.1	p2	(CA)6	12	8008533	8008544	p2	(CA)6	12
NW_020822370.1	p2	(TG)25	50	8020159	8020208	p2	(TG)25	50
NW_020822370.1	p2	(GT)30	60	8028277	8028336	p2	(GT)30	60
NW_020822370.1	p2	(TG)10	20	8032768	8032787	p2	(TG)10	20
NW_020822370.1	p2	(GT)6	12	8035200	8035211	p2	(GT)6	12
NW_020822370.1	p2	(AC)25	50	8058253	8058302	p2	(AC)25	50
NW_020822370.1	p2	(TG)24	48	8062985	8063032	p2	(TG)24	48
NW_020822370.1	p2	(CT)38	76	8068680	8068755	p2	(CT)38	76
NW_020822370.1	p2	(TG)6	12	8071206	8071217	p2	(TG)6	12
NW_020822370.1	p2	(TG)31	62	8077507	8077568	p2	(TG)31	62
NW_020822370.1	p2	(GT)29	58	8078031	8078088	p2	(GT)29	58
NW_020822370.1	p2	(AC)19	38	8082784	8082821	p2	(AC)19	38
NW_020822370.1	p2	(GA)31	62	8084287	8084348	p2	(GA)31	62
NW_020822370.1	p2	(TG)6	12	8104357	8104368	p2	(TG)6	12
NW_020822370.1	p2	(GT)33	66	8110738	8110803	p2	(GT)33	66
NW_020822370.1	p2	(GT)24	48	8112773	8112820	p2	(GT)24	48
NW_020822370.1	p2	(GT)23	46	8127133	8127178	p2	(GT)23	46
NW_020822370.1	p2	(AC)10	20	8144886	8144905	p2	(AC)10	20
NW_020822370.1	p2	(AC)6	12	8153427	8153438	p2	(AC)6	12
NW_020822370.1	p2	(GA)7	14	8155488	8155501	p2	(GA)7	14
NW_020822370.1	p2	(GA)6	12	8156594	8156605	p2	(GA)6	12
NW_020822370.1	p2	(GT)20	40	8161092	8161131	p2	(GT)20	40
NW_020822370.1	p2	(CA)23	46	8161776	8161821	p2	(CA)23	46
NW_020822370.1	p2	(AC)21	42	8163909	8163950	p2	(AC)21	42
NW_020822370.1	p2	(CA)12	24	8177750	8177773	p2	(CA)12	24
NW_020822370.1	p2	(AC)28	56	8186011	8186066	p2	(AC)28	56
NW_020822370.1	p2	(GT)19	38	8187226	8187263	p2	(GT)19	38
NW_020822370.1	p2	(CT)19	38	8188086	8188123	p2	(CT)19	38
NW_020822370.1	p2	(CA)17	34	8194922	8194955	p2	(CA)17	34
NW_020822370.1	p2	(GT)18	36	8197982	8198017	p2	(GT)18	36
NW_020822370.1	p2	(AC)21	42	8199596	8199637	p2	(AC)21	42
NW_020822370.1	p2	(AC)14	28	8215047	8215074	p2	(AC)14	28
NW_020822370.1	p2	(CA)8	16	8226593	8226608	p2	(CA)8	16
NW_020822370.1	p2	(TC)6	12	8228477	8228488	p2	(TC)6	12
NW_020822370.1	p2	(GA)25	50	8249432	8249481	p2	(GA)25	50
NW_020822370.1	p2	(CT)27	54	8259470	8259523	p2	(CT)27	54
NW_020822370.1	p2	(AC)20	40	8260345	8260384	p2	(AC)20	40
NW_020822370.1	p2	(TG)26	52	8269018	8269069	p2	(TG)26	52
NW_020822370.1	p2	(AG)36	72	8270219	8270290	p2	(AG)36	72
NW_020822370.1	p2	(CA)10	20	8286179	8286198	p2	(CA)10	20
NW_020822370.1	p2	(TC)28	56	8297517	8297572	p2	(TC)28	56
NW_020822370.1	p2	(TC)10	20	8307231	8307250	p2	(TC)10	20
NW_020822370.1	p2	(GT)7	14	8307562	8307575	p2	(GT)7	14
NW_020822370.1	p2	(GT)17	34	8309657	8309690	p2	(GT)17	34
NW_020822370.1	p2	(CA)23	46	8317317	8317362	p2	(CA)23	46
NW_020822370.1	p2	(TA)6	12	8319565	8319576	p2	(TA)6	12
NW_020822370.1	p2	(TC)28	56	8322192	8322247	p2	(TC)28	56
NW_020822370.1	p2	(CA)20	40	8330358	8330397	p2	(CA)20	40
NW_020822370.1	p2	(TG)6	12	8340934	8340945	p2	(TG)6	12
NW_020822370.1	p2	(AC)24	48	8352368	8352415	p2	(AC)24	48
NW_020822370.1	p2	(CA)12	24	8353813	8353836	p2	(CA)12	24
NW_020822370.1	p2	(AC)28	56	8361546	8361601	p2	(AC)28	56
NW_020822370.1	p2	(TG)16	32	8374710	8374741	p2	(TG)16	32
NW_020822370.1	p2	(GT)6	12	8378641	8378652	p2	(GT)6	12
NW_020822370.1	p2	(CA)6	12	8385338	8385349	p2	(CA)6	12
NW_020822370.1	p2	(TG)6	12	8396016	8396027	p2	(TG)6	12
NW_020822370.1	p2	(CA)17	34	8416950	8416983	p2	(CA)17	34
NW_020822370.1	p2	(GA)8	16	8422367	8422382	p2	(GA)8	16
NW_020822370.1	p2	(AC)14	28	8425026	8425053	p2	(AC)14	28
NW_020822370.1	p2	(GT)21	42	8425843	8425884	p2	(GT)21	42
NW_020822370.1	p2	(AC)25	50	8426372	8426421	p2	(AC)25	50
NW_020822370.1	p2	(CT)7	14	8430366	8430379	p2	(CT)7	14
NW_020822370.1	p2	(AT)23	46	8443547	8443592	p2	(AT)23	46
NW_020822370.1	p2	(GT)23	46	8444971	8445016	p2	(GT)23	46
NW_020822370.1	p2	(AT)15	30	8445728	8445757	p2	(AT)15	30
NW_020822370.1	p2	(TC)28	56	8447176	8447231	p2	(TC)28	56
NW_020822370.1	p2	(CA)11	22	8448114	8448135	p2	(CA)11	22
NW_020822370.1	p2	(CA)29	58	8453933	8453990	p2	(CA)29	58
NW_020822370.1	p2	(AC)18	36	8464919	8464954	p2	(AC)18	36
NW_020822370.1	p2	(AT)11	22	8470529	8470550	p2	(AT)11	22
NW_020822370.1	p2	(CT)20	40	8471370	8471409	p2	(CT)20	40
NW_020822370.1	p2	(GT)20	40	8474554	8474593	p2	(GT)20	40
NW_020822370.1	p2	(TC)28	56	8475339	8475394	p2	(TC)28	56
NW_020822370.1	p2	(AC)10	20	8475792	8475811	p2	(AC)10	20
NW_020822370.1	p2	(GT)16	32	8476838	8476869	p2	(GT)16	32
NW_020822370.1	p2	(CT)7	14	8510792	8510805	p2	(CT)7	14
NW_020822370.1	p2	(TG)9	18	8518957	8518974	p2	(TG)9	18
NW_020822370.1	p2	(CA)12	24	8521735	8521758	p2	(CA)12	24
NW_020822370.1	p2	(TG)6	12	8522055	8522066	p2	(TG)6	12
NW_020822370.1	p2	(CA)21	42	8534813	8534854	p2	(CA)21	42
NW_020822370.1	p2	(TC)23	46	8538453	8538498	p2	(TC)23	46
NW_020822370.1	p2	(AC)23	46	8548109	8548154	p2	(AC)23	46
NW_020822370.1	p2	(CA)20	40	8552996	8553035	p2	(CA)20	40
NW_020822370.1	p2	(TC)6	12	8557098	8557109	p2	(TC)6	12
NW_020822370.1	p2	(TG)19	38	8565023	8565060	p2	(TG)19	38
NW_020822370.1	p2	(CA)8	16	8603019	8603034	p2	(CA)8	16
NW_020822370.1	p2	(CT)24	48	8617070	8617117	p2	(CT)24	48
NW_020822370.1	p2	(AG)19	38	8630027	8630064	p2	(AG)19	38
NW_020822370.1	p2	(CA)22	44	8632605	8632648	p2	(CA)22	44
NW_020822370.1	p2	(CA)7	14	8633806	8633819	p2	(CA)7	14
NW_020822370.1	p2	(AC)9	18	8637896	8637913	p2	(AC)9	18
NW_020822370.1	p2	(TC)6	12	8639271	8639282	p2	(TC)6	12
NW_020822370.1	p2	(GT)22	44	8640014	8640057	p2	(GT)22	44
NW_020822370.1	p2	(TG)11	22	8640756	8640777	p2	(TG)11	22
NW_020822370.1	p2	(AC)24	48	8654502	8654549	p2	(AC)24	48
NW_020822370.1	p2	(AG)9	18	8662264	8662281	p2	(AG)9	18
NW_020822370.1	p2	(AT)6	12	8673453	8673464	p2	(AT)6	12
NW_020822370.1	p2	(AC)21	42	8681123	8681164	p2	(AC)21	42
NW_020822370.1	p2	(TG)8	16	8683633	8683648	p2	(TG)8	16
NW_020822370.1	p2	(AC)24	48	8702880	8702927	p2	(AC)24	48
NW_020822370.1	p2	(TC)6	12	8726036	8726047	p2	(TC)6	12
NW_020822370.1	p2	(TG)17	34	8727881	8727914	p2	(TG)17	34
NW_020822370.1	p2	(TC)29	58	8731159	8731216	p2	(TC)29	58
NW_020822370.1	p2	(GT)14	28	8743159	8743186	p2	(GT)14	28
NW_020822370.1	p2	(AC)25	50	8752673	8752722	p2	(AC)25	50
NW_020822370.1	p2	(GT)28	56	8755996	8756051	p2	(GT)28	56
NW_020822370.1	p2	(GT)6	12	8760589	8760600	p2	(GT)6	12
NW_020822370.1	p2	(AG)7	14	8773528	8773541	p2	(AG)7	14
NW_020822370.1	p2	(CT)6	12	8775001	8775012	p2	(CT)6	12
NW_020822370.1	p2	(TG)9	18	8779967	8779984	p2	(TG)9	18
NW_020822370.1	p2	(GT)25	50	8785453	8785502	p2	(GT)25	50
NW_020822370.1	p2	(TG)23	46	8792031	8792076	p2	(TG)23	46
NW_020822370.1	p2	(GT)16	32	8792680	8792711	p2	(GT)16	32
NW_020822370.1	p2	(GT)25	50	8794392	8794441	p2	(GT)25	50
NW_020822370.1	p2	(GT)24	48	8801058	8801105	p2	(GT)24	48
NW_020822370.1	p2	(AC)28	56	8802966	8803021	p2	(AC)28	56
NW_020822370.1	p2	(GT)16	32	8804187	8804218	p2	(GT)16	32
NW_020822370.1	p2	(CA)19	38	8806965	8807002	p2	(CA)19	38
NW_020822370.1	p2	(AC)7	14	8807483	8807496	p2	(AC)7	14
NW_020822370.1	p2	(TG)24	48	8821127	8821174	p2	(TG)24	48
NW_020822370.1	p2	(GA)23	46	8823815	8823860	p2	(GA)23	46
NW_020822370.1	p2	(GT)8	16	8828434	8828449	p2	(GT)8	16
NW_020822370.1	p2	(GT)24	48	8828750	8828797	p2	(GT)24	48
NW_020822370.1	p2	(AC)16	32	8840282	8840313	p2	(AC)16	32
NW_020822370.1	p2	(GT)24	48	8849649	8849696	p2	(GT)24	48
NW_020822370.1	p2	(TG)7	14	8858581	8858594	p2	(TG)7	14
NW_020822370.1	p2	(AC)30	60	8885878	8885937	p2	(AC)30	60
NW_020822370.1	p2	(TG)7	14	8886361	8886374	p2	(TG)7	14
NW_020822370.1	p2	(GT)23	46	8901821	8901866	p2	(GT)23	46
NW_020822370.1	p2	(GT)14	28	8907889	8907916	p2	(GT)14	28
NW_020822370.1	p2	(TG)23	46	8908597	8908642	p2	(TG)23	46
NW_020822370.1	p2	(AC)25	50	8909328	8909377	p2	(AC)25	50
NW_020822370.1	p2	(TG)17	34	8913874	8913907	p2	(TG)17	34
NW_020822370.1	p2	(TG)8	16	8919300	8919315	p2	(TG)8	16
NW_020822370.1	p2	(TG)9	18	8921474	8921491	p2	(TG)9	18
NW_020822370.1	p2	(TC)30	60	8922388	8922447	p2	(TC)30	60
NW_020822370.1	p2	(TG)12	24	8928018	8928041	p2	(TG)12	24
NW_020822370.1	p2	(TG)17	34	8930823	8930856	p2	(TG)17	34
NW_020822370.1	p2	(GT)29	58	8942644	8942701	p2	(GT)29	58
NW_020822370.1	p2	(AC)22	44	8946349	8946392	p2	(AC)22	44
NW_020822370.1	p2	(CA)23	46	8950716	8950761	p2	(CA)23	46
NW_020822370.1	p2	(CA)24	48	8954822	8954869	p2	(CA)24	48
NW_020822370.1	p2	(AC)24	48	8955687	8955734	p2	(AC)24	48
NW_020822370.1	p2	(AC)8	16	8964739	8964754	p2	(AC)8	16
NW_020822370.1	p2	(TG)20	40	8965645	8965684	p2	(TG)20	40
NW_020822370.1	p2	(AG)28	56	8985239	8985294	p2	(AG)28	56
NW_020822370.1	p2	(AC)27	54	8985803	8985856	p2	(AC)27	54
NW_020822370.1	p2	(GT)25	50	8989040	8989089	p2	(GT)25	50
NW_020822370.1	p2	(CT)8	16	9005551	9005566	p2	(CT)8	16
NW_020822370.1	p2	(TG)6	12	9010921	9010932	p2	(TG)6	12
NW_020822370.1	p2	(TG)8	16	9015159	9015174	p2	(TG)8	16
NW_020822370.1	p2	(TG)18	36	9018073	9018108	p2	(TG)18	36
NW_020822370.1	p2	(GT)18	36	9020247	9020282	p2	(GT)18	36
NW_020822370.1	p2	(GT)6	12	9027862	9027873	p2	(GT)6	12
NW_020822370.1	p2	(CA)24	48	9030662	9030709	p2	(CA)24	48
NW_020822370.1	p2	(AT)10	20	9045810	9045829	p2	(AT)10	20
NW_020822370.1	p2	(AG)28	56	9047074	9047129	p2	(AG)28	56
NW_020822370.1	p2	(AC)33	66	9049996	9050061	p2	(AC)33	66
NW_020822370.1	p2	(TC)27	54	9055002	9055055	p2	(TC)27	54
NW_020822370.1	p2	(TG)25	50	9055484	9055533	p2	(TG)25	50
NW_020822370.1	p2	(AC)25	50	9059402	9059451	p2	(AC)25	50
NW_020822370.1	p2	(CA)20	40	9063401	9063440	p2	(CA)20	40
NW_020822370.1	p2	(AC)27	54	9067397	9067450	p2	(AC)27	54
NW_020822370.1	p2	(AC)26	52	9069848	9069899	p2	(AC)26	52
NW_020822370.1	p2	(CA)22	44	9073328	9073371	p2	(CA)22	44
NW_020822370.1	p2	(AG)17	34	9075941	9075974	p2	(AG)17	34
NW_020822370.1	p2	(GT)13	26	9078233	9078258	p2	(GT)13	26
NW_020822370.1	p2	(GT)24	48	9081918	9081965	p2	(GT)24	48
NW_020822370.1	p2	(AC)23	46	9082746	9082791	p2	(AC)23	46
NW_020822370.1	p2	(CA)6	12	9092009	9092020	p2	(CA)6	12
NW_020822370.1	p2	(GT)28	56	9094959	9095014	p2	(GT)28	56
NW_020822370.1	p2	(GA)31	62	9108861	9108922	p2	(GA)31	62
NW_020822370.1	p2	(GT)23	46	9111063	9111108	p2	(GT)23	46
NW_020822370.1	p2	(GA)31	62	9116184	9116245	p2	(GA)31	62
NW_020822370.1	p2	(GT)21	42	9118491	9118532	p2	(GT)21	42
NW_020822370.1	p2	(AC)31	62	9137119	9137180	p2	(AC)31	62
NW_020822370.1	p2	(GT)29	58	9140161	9140218	p2	(GT)29	58
NW_020822370.1	p2	(TG)14	28	9142183	9142210	p2	(TG)14	28
NW_020822370.1	p2	(AC)16	32	9143926	9143957	p2	(AC)16	32
NW_020822370.1	p2	(AC)18	36	9150496	9150531	p2	(AC)18	36
NW_020822370.1	p2	(CA)23	46	9151856	9151901	p2	(CA)23	46
NW_020822370.1	p2	(AC)24	48	9165553	9165600	p2	(AC)24	48
NW_020822370.1	p2	(GT)23	46	9170391	9170436	p2	(GT)23	46
[truncated: 407,630+ more rows]

## Sheet: S11 indel MS
Supplemental Table S11: Microsatellites containing insertion and or deletion mutations.
MSI Predicted	start	stop	Motif number	Motif	No. bp in repeat unit
NW_020822366.1	104076	104145	p2	(CA)35	70
NW_020822366.1	1201211	1201266	p2	(GT)28	56
NW_020822370.1	2463041	2463102	p2	(TG)31	62
NW_020822370.1	8110738	8110803	p2	(GT)33	66
NW_020822370.1	8127133	8127178	p2	(GT)23	46
NW_020822370.1	9553667	9553714	p2	(AC)24	48
NW_020822370.1	14096320	14096335	p2	(GT)8	16
NW_020822370.1	15348112	15348155	p2	(TG)22	44
NW_020822370.1	29116441	29116484	p2	(AG)22	44
NW_020822370.1	29116441	29116484	p2	(AG)22	44
NW_020822370.1	30742605	30742656	p2	(AC)26	52
NW_020822370.1	34498267	34498328	p2	(GA)31	62
NW_020822370.1	37167848	37167903	p2	(AG)28	56
NW_020822372.1	647815	647862	p2	(GT)24	48
NW_020822372.1	879230	879271	p2	(TC)21	42
NW_020822372.1	945087	945136	p2	(AC)25	50
NW_020822372.1	1388522	1388559	p2	(AT)19	38
NW_020822372.1	1388522	1388559	p2	(AT)19	38
NW_020822372.1	1669962	1670017	p2	(GA)28	56
NW_020822372.1	1914288	1914325	p2	(TG)19	38
NW_020822372.1	2555642	2555693	p2	(TG)26	52
NW_020822373.1	2402661	2402720	p2	(CT)30	60
NW_020822373.1	4519968	4519999	p2	(AT)16	32
NW_020822373.1	4520659	4520712	p2	(TC)27	54
NW_020822374.1	1687440	1687487	p2	(TC)24	48
NW_020822374.1	3436491	3436526	p2	(GT)18	36
NW_020822375.1	2612088	2612151	p2	(TC)32	64
NW_020822375.1	8542022	8542079	p2	(TC)29	58
NW_020822375.1	9167105	9167158	p2	(GT)27	54
NW_020822375.1	17052337	17052382	p2	(AC)23	46
NW_020822375.1	17984477	17984522	p2	(GT)23	46
NW_020822375.1	18627770	18627821	p2	(CT)26	52
NW_020822375.1	24391224	24391239	p2	(CA)8	16
NW_020822375.1	29463404	29463441	p2	(AC)19	38
NW_020822375.1	32875389	32875442	p2	(TC)27	54
NW_020822375.1	33670609	33670624	p2	(TG)8	16
NW_020822375.1	33670609	33670624	p2	(TG)8	16
NW_020822375.1	34248088	34248129	p2	(TC)21	42
NW_020822376.1	124801	124852	p2	(TG)26	52
NW_020822376.1	1360974	1361019	p2	(TG)23	46
NW_020822376.1	2957094	2957107	p2	(CA)7	14
NW_020822376.1	2990186	2990239	p2	(TC)27	54
NW_020822377.1	1615917	1615972	p2	(AG)28	56
NW_020822377.1	2892389	2892400	p2	(GA)6	12
NW_020822377.1	3007406	3007455	p2	(GT)25	50
NW_020822379.1	279483	279494	p2	(CA)6	12
NW_020822379.1	3551932	3551943	p2	(CT)6	12
NW_020822381.1	276068	276125	p2	(AC)29	58
NW_020822381.1	2203796	2203857	p2	(GT)31	62
NW_020822385.1	1525109	1525170	p2	(CT)31	62
NW_020822391.1	722529	722592	p2	(GA)32	64
NW_020822391.1	959352	959403	p2	(TG)26	52
NW_020822393.1	476636	476697	p2	(AC)31	62
NW_020822398.1	7596423	7596476	p2	(AC)27	54
NW_020822398.1	12940037	12940112	p2	(CA)38	76
NW_020822398.1	19590551	19590618	p2	(TG)34	68
NW_020822398.1	23846257	23846316	p2	(CA)30	60
NW_020822399.1	659458	659513	p2	(AC)28	56
NW_020822403.1	6353536	6353563	p2	(TG)14	28
NW_020822403.1	15489861	15489902	p2	(CT)21	42
NW_020822403.1	15489861	15489902	p2	(CT)21	42
NW_020822403.1	15932979	15933030	p2	(AC)26	52
NW_020822403.1	15932979	15933030	p2	(AC)26	52
NW_020822403.1	18657931	18657984	p2	(AG)27	54
NW_020822403.1	19387292	19387341	p2	(AC)25	50
NW_020822403.1	19387292	19387341	p2	(AC)25	50
NW_020822403.1	20742312	20742385	p2	(AG)37	74
NW_020822406.1	3701096	3701141	p2	(GT)23	46
NW_020822406.1	6482835	6482896	p2	(GT)31	62
NW_020822406.1	11260210	11260273	p2	(GT)32	64
NW_020822406.1	13840512	13840575	p2	(TG)32	64
NW_020822406.1	14179252	14179353	p2	(AC)51	102
NW_020822406.1	14321717	14321770	p2	(TG)27	54
NW_020822406.1	15073073	15073124	p2	(GA)26	52
NW_020822406.1	15342349	15342404	p2	(CA)28	56
NW_020822406.1	17912577	17912642	p2	(AC)33	66
NW_020822406.1	21688556	21688625	p2	(GA)35	70
NW_020822407.1	2543948	2544013	p2	(AC)33	66
NW_020822407.1	5019112	5019161	p2	(TG)25	50
NW_020822407.1	10317026	10317085	p2	(CA)30	60
NW_020822407.1	14408012	14408029	p2	(CA)9	18
NW_020822407.1	22598148	22598209	p2	(GA)31	62
NW_020822407.1	22819671	22819682	p2	(TG)6	12
NW_020822409.1	267251	267296	p2	(TG)23	46
NW_020822409.1	1564291	1564350	p2	(GA)30	60
NW_020822409.1	3115076	3115133	p2	(TG)29	58
NW_020822409.1	3394106	3394143	p2	(AC)19	38
NW_020822409.1	7040050	7040101	p2	(GT)26	52
NW_020822409.1	12424621	12424682	p2	(GT)31	62
NW_020822409.1	15071491	15071556	p2	(AC)33	66
NW_020822409.1	16972345	16972392	p2	(AC)24	48
NW_020822409.1	17152281	17152292	p2	(CA)6	12
NW_020822409.1	17152974	17153013	p2	(AG)20	40
NW_020822409.1	17507525	17507538	p2	(AG)7	14
NW_020822409.1	18710068	18710081	p2	(AC)7	14
NW_020822409.1	18888678	18888745	p2	(CA)34	68
NW_020822409.1	20104503	20104554	p2	(AC)26	52
NW_020822410.1	2758483	2758546	p2	(AC)32	64
NW_020822410.1	6012519	6012568	p2	(AG)25	50
NW_020822410.1	10153965	10154048	p2	(AG)42	84
NW_020822410.1	10858293	10858330	p2	(AC)19	38
NW_020822410.1	13888649	13888704	p2	(GT)28	56
NW_020822410.1	14031239	14031304	p2	(TG)33	66
NW_020822410.1	17493393	17493448	p2	(GA)28	56
NW_020822410.1	19087154	19087209	p2	(GT)28	56
NW_020822412.1	26023	26056	p2	(TG)17	34
NW_020822412.1	869634	869673	p2	(TG)20	40
NW_020822412.1	3706717	3706768	p2	(TG)26	52
NW_020822412.1	3775425	3775476	p2	(TG)26	52
NW_020822412.1	4566335	4566394	p2	(GT)30	60
NW_020822412.1	8801952	8802011	p2	(AC)30	60
NW_020822412.1	18127636	18127695	p2	(GA)30	60
NW_020822415.1	8567440	8567495	p2	(AC)28	56
NW_020822415.1	14829488	14829539	p2	(AC)26	52
NW_020822415.1	17647673	17647726	p2	(CA)27	54
NW_020822415.1	17647673	17647726	p2	(CA)27	54
NW_020822415.1	17888427	17888504	p2	(CA)39	78
NW_020822415.1	26126523	26126536	p2	(TC)7	14
NW_020822415.1	32316441	32316452	p2	(GT)6	12
NW_020822415.1	36220572	36220633	p2	(TC)31	62
NW_020822415.1	37628803	37628830	p2	(TG)14	28
NW_020822415.1	38582968	38583025	p2	(CA)29	58
NW_020822415.1	47239570	47239629	p2	(AC)30	60
NW_020822415.1	48848595	48848612	p2	(TG)9	18
NW_020822415.1	49321402	49321437	p2	(TG)18	36
NW_020822415.1	49925791	49925854	p2	(AC)32	64
NW_020822415.1	49956552	49956593	p2	(AC)21	42
NW_020822415.1	54240278	54240329	p2	(GT)26	52
NW_020822420.1	2037354	2037399	p2	(AC)23	46
NW_020822421.1	5779862	5779919	p2	(TC)29	58
NW_020822421.1	8495826	8495901	p2	(AG)38	76
NW_020822421.1	8930205	8930252	p2	(GT)24	48
NW_020822423.1	1350051	1350086	p2	(AT)18	36
NW_020822423.1	6769062	6769105	p2	(CA)22	44
NW_020822423.1	9170838	9170885	p2	(AG)24	48
NW_020822423.1	10750631	10750684	p2	(CA)27	54
NW_020822425.1	3808023	3808036	p2	(TG)7	14
NW_020822425.1	3808023	3808036	p2	(TG)7	14
NW_020822425.1	13981231	13981272	p2	(TG)21	42
NW_020822425.1	22372480	22372541	p2	(CA)31	62
NW_020822425.1	22819891	22819904	p2	(AC)7	14
NW_020822425.1	30365419	30365468	p2	(GT)25	50
NW_020822425.1	30854564	30854575	p2	(TC)6	12
NW_020822426.1	1539426	1539469	p2	(GT)22	44
NW_020822426.1	1539426	1539469	p2	(GT)22	44
NW_020822426.1	2048769	2048866	p2	(GT)49	98
NW_020822426.1	3911780	3911833	p2	(CT)27	54
NW_020822426.1	5559386	5559447	p2	(GA)31	62
NW_020822427.1	2394228	2394293	p2	(TG)33	66
NW_020822427.1	3584749	3584800	p2	(CT)26	52
NW_020822427.1	3694174	3694245	p2	(GA)36	72
NW_020822427.1	4986317	4986374	p2	(AC)29	58
NW_020822428.1	1366043	1366094	p2	(AC)26	52
NW_020822428.1	1367833	1367884	p2	(AC)26	52
NW_020822428.1	8906569	8906650	p2	(GT)41	82
NW_020822429.1	367343	367354	p2	(GT)6	12
NW_020822429.1	2226371	2226424	p2	(CA)27	54
NW_020822429.1	2917642	2917697	p2	(GT)28	56
NW_020822429.1	3233511	3233558	p2	(GT)24	48
NW_020822429.1	4032246	4032307	p2	(GT)31	62
NW_020822432.1	6019625	6019682	p2	(GT)29	58
NW_020822432.1	6383507	6383544	p2	(TG)19	38
NW_020822432.1	7297012	7297057	p2	(AC)23	46
NW_020822434.1	481373	481388	p2	(TC)8	16
NW_020822434.1	512270	512325	p2	(GT)28	56
NW_020822434.1	512270	512325	p2	(GT)28	56
NW_020822434.1	1725924	1725979	p2	(TC)28	56
NW_020822434.1	3078748	3078809	p2	(GT)31	62
NW_020822435.1	2066298	2066353	p2	(AC)28	56
NW_020822435.1	5025754	5025895	p2	(AC)71	142
NW_020822436.1	3837087	3837118	p2	(AC)16	32
NW_020822436.1	5683015	5683072	p2	(AC)29	58
NW_020822438.1	4786146	4786195	p2	(TG)25	50
NW_020822438.1	5542919	5542964	p2	(TC)23	46
NW_020822438.1	6766679	6766698	p2	(GT)10	20
NW_020822438.1	10564478	10564529	p2	(AC)26	52
NW_020822438.1	11784399	11784462	p2	(AC)32	64
NW_020822438.1	15486218	15486267	p2	(AC)25	50
NW_020822438.1	24617284	24617329	p2	(TG)23	46
NW_020822438.1	25130858	25130869	p2	(AG)6	12
NW_020822438.1	28459764	28459789	p2	(AC)13	26
NW_020822438.1	29692442	29692471	p2	(TG)15	30
NW_020822438.1	34152610	34152667	p2	(TG)29	58
NW_020822439.1	243482	243531	p2	(CA)25	50
NW_020822439.1	2390620	2390743	p2	(TG)62	124
NW_020822439.1	11495931	11495972	p2	(AC)21	42
NW_020822439.1	16167573	16167628	p2	(CT)28	56
NW_020822439.1	16584707	16584722	p2	(GT)8	16
NW_020822439.1	16753538	16753549	p2	(TG)6	12
NW_020822439.1	19326360	19326403	p2	(CA)22	44
NW_020822439.1	42474232	42474301	p2	(GT)35	70
NW_020822439.1	47065857	47065926	p2	(TC)35	70
NW_020822439.1	47773554	47773605	p2	(AC)26	52
NW_020822439.1	47999401	47999412	p2	(TG)6	12
NW_020822439.1	48446354	48446365	p2	(GT)6	12
NW_020822439.1	50266457	50266518	p2	(TG)31	62
NW_020822439.1	51320832	51320895	p2	(TG)32	64
NW_020822439.1	51320832	51320895	p2	(TG)32	64
NW_020822439.1	52665495	52665512	p2	(TA)9	18
NW_020822439.1	54169933	54169970	p2	(GT)19	38
NW_020822439.1	54295031	54295078	p2	(CA)24	48
NW_020822439.1	55158455	55158466	p2	(GT)6	12
NW_020822439.1	55241821	55241876	p2	(GA)28	56
NW_020822439.1	59816440	59816495	p2	(TG)28	56
NW_020822439.1	60320333	60320346	p2	(TG)7	14
NW_020822439.1	62174699	62174744	p2	(GT)23	46
NW_020822439.1	62557805	62557852	p2	(TG)24	48
NW_020822439.1	66094811	66094858	p2	(AC)24	48
NW_020822439.1	68421852	68421909	p2	(AC)29	58
NW_020822439.1	68543274	68543335	p2	(GT)31	62
NW_020822439.1	74561328	74561383	p2	(TG)28	56
NW_020822439.1	75506320	75506373	p2	(TG)27	54
NW_020822439.1	80544865	80544918	p2	(AG)27	54
NW_020822440.1	3560645	3560700	p2	(GA)28	56
NW_020822442.1	5268652	5268715	p2	(CA)32	64
NW_020822443.1	2115154	2115207	p2	(AC)27	54
NW_020822443.1	2768080	2768127	p2	(GT)24	48
NW_020822443.1	5765508	5765527	p2	(GT)10	20
NW_020822444.1	283133	283174	p2	(AC)21	42
NW_020822444.1	1750093	1750136	p2	(AG)22	44
NW_020822446.1	382264	382327	p2	(CA)32	64
NW_020822446.1	458656	458713	p2	(AG)29	58
NW_020822446.1	2721114	2721175	p2	(AG)31	62
NW_020822449.1	1097163	1097208	p2	(AC)23	46
NW_020822450.1	7438407	7438462	p2	(AG)28	56
NW_020822450.1	9390270	9390313	p2	(AC)22	44
NW_020822450.1	9390270	9390313	p2	(AC)22	44
NW_020822450.1	23299062	23299079	p2	(CT)9	18
NW_020822450.1	24139027	24139078	p2	(TC)26	52
NW_020822452.1	101897	101946	p2	(AC)25	50
NW_020822452.1	101897	101946	p2	(AC)25	50
NW_020822452.1	3489405	3489474	p2	(CT)35	70
NW_020822452.1	3531306	3531361	p2	(CA)28	56
NW_020822452.1	5814841	5814904	p2	(AG)32	64
NW_020822452.1	5814841	5814904	p2	(AG)32	64
NW_020822452.1	8077515	8077556	p2	(AC)21	42
NW_020822452.1	9210371	9210432	p2	(CT)31	62
NW_020822452.1	9212531	9212590	p2	(GA)30	60
NW_020822452.1	11799794	11799847	p2	(GT)27	54
NW_020822452.1	12401477	12401530	p2	(GT)27	54
NW_020822452.1	14826433	14826478	p2	(GT)23	46
NW_020822452.1	16119720	16119731	p2	(TC)6	12
NW_020822452.1	17708120	17708163	p2	(CA)22	44
NW_020822452.1	17743942	17743995	p2	(AC)27	54
NW_020822452.1	18052684	18052717	p2	(AT)17	34
NW_020822452.1	18052684	18052717	p2	(AT)17	34
NW_020822452.1	22116513	22116554	p2	(GT)21	42
NW_020822452.1	22619044	22619089	p2	(AG)23	46
NW_020822452.1	23276328	23276349	p2	(AC)11	22
NW_020822452.1	23471730	23471799	p2	(TG)35	70
NW_020822452.1	23686938	23686977	p2	(AC)20	40
NW_020822452.1	24445314	24445363	p2	(TG)25	50
NW_020822452.1	24960041	24960080	p2	(AC)20	40
NW_020822454.1	3412756	3412809	p2	(AC)27	54
NW_020822454.1	7630191	7630244	p2	(CT)27	54
NW_020822454.1	9686858	9686899	p2	(AC)21	42
NW_020822454.1	14520438	14520453	p2	(GT)35	70
NW_020822454.1	15813789	15813846	p2	(CA)29	58
NW_020822455.1	5584517	5584558	p2	(TG)21	42
NW_020822455.1	6553029	6553044	p2	(TG)8	16
NW_020822455.1	16094928	16094993	p2	(AG)33	66
NW_020822455.1	16141535	16141594	p2	(AC)30	60
NW_020822455.1	16470550	16470611	p2	(CT)31	62
NW_020822455.1	17011448	17011535	p2	(TG)44	88
NW_020822457.1	1085442	1085493	p2	(CA)26	52
NW_020822457.1	1928500	1928553	p2	(TC)27	54
NW_020822457.1	3641251	3641302	p2	(AC)26	52
NW_020822457.1	10316075	10316140	p2	(GT)33	66
NW_020822457.1	13380199	13380244	p2	(GT)23	46
NW_020822458.1	10474172	10474241	p2	(TG)35	70
NW_020822458.1	15628625	15628678	p2	(AG)27	54
NW_020822459.1	223987	224046	p2	(TC)30	60
NW_020822459.1	5986998	5987045	p2	(GA)24	48
NW_020822459.1	12094761	12094806	p2	(TG)23	46
NW_020822460.1	4314605	4314648	p2	(GT)22	44
NW_020822460.1	4885675	4885716	p2	(GT)21	42
NW_020822460.1	6214794	6214823	p2	(AC)15	30
NW_020822461.1	1947346	1947393	p2	(CA)24	48
NW_020822461.1	5846403	5846454	p2	(GT)26	52
NW_020822461.1	10409373	10409442	p2	(TC)35	70
NW_020822461.1	14329481	14329510	p2	(GT)15	30
NW_020822461.1	16942463	16942514	p2	(GT)26	52
NW_020822461.1	17714757	17714802	p2	(AG)23	46
NW_020822461.1	18311734	18311795	p2	(TC)31	62
NW_020822461.1	18492737	18492790	p2	(CA)27	54
NW_020822461.1	23334820	23334877	p2	(AC)29	58
NW_020822461.1	26591927	26591978	p2	(GT)26	52
NW_020822461.1	30818944	30818957	p2	(GT)7	14
NW_020822461.1	50434674	50434747	p2	(TC)37	74
NW_020822462.1	6042172	6042229	p2	(GA)29	58
NW_020822462.1	6718722	6718777	p2	(TC)28	56
NW_020822462.1	6718722	6718777	p2	(TC)28	56
NW_020822462.1	10240698	10240761	p2	(AG)32	64
NW_020822462.1	11186346	11186389	p2	(AC)22	44
NW_020822462.1	12394463	12394504	p2	(AC)21	42
NW_020822462.1	12644533	12644578	p2	(TG)23	46
NW_020822464.1	1598540	1598591	p2	(AC)26	52
NW_020822464.1	1802811	1802854	p2	(AC)22	44
NW_020822464.1	1882022	1882095	p2	(AC)37	74
NW_020822464.1	2362924	2362977	p2	(AG)27	54
NW_020822464.1	5966164	5966225	p2	(AC)31	62
NW_020822464.1	6242924	6242975	p2	(TG)26	52
NW_020822464.1	11087072	11087087	p2	(AT)8	16
NW_020822465.1	1645131	1645148	p2	(TG)9	18
NW_020822465.1	3154552	3154605	p2	(TC)27	54
NW_020822465.1	3443360	3443411	p2	(TG)26	52
NW_020822465.1	6862786	6862855	p2	(AC)35	70
NW_020822465.1	9368182	9368239	p2	(AG)29	58
NW_020822465.1	11447743	11447826	p2	(TC)42	84
NW_020822466.1	4350574	4350613	p2	(GA)20	40
NW_020822466.1	6395856	6395905	p2	(AC)25	50
NW_020822466.1	8003406	8003433	p2	(TG)14	28
NW_020822466.1	10896811	10896868	p2	(AC)29	58
NW_020822467.1	3547135	3547182	p2	(AC)24	48
NW_020822467.1	5172280	5172331	p2	(AC)26	52
NW_020822467.1	5172280	5172331	p2	(AC)26	52
NW_020822467.1	5626781	5626834	p2	(GA)27	54
NW_020822467.1	7080806	7080867	p2	(AG)31	62
NW_020822467.1	8253202	8253225	p2	(AT)12	24
NW_020822468.1	1340335	1340390	p2	(TG)28	56
NW_020822468.1	2457110	2457171	p2	(TG)31	62
NW_020822468.1	2517487	2517544	p2	(AC)29	58
NW_020822468.1	3665425	3665474	p2	(AG)25	50
NW_020822468.1	4642510	4642567	p2	(TC)29	58
NW_020822468.1	4880241	4880292	p2	(AG)26	52
NW_020822468.1	15157366	15157435	p2	(GT)35	70
NW_020822468.1	15558510	15558523	p2	(GT)7	14
NW_020822468.1	27632778	27632815	p2	(TG)19	38
NW_020822468.1	32346933	32346986	p2	(AC)27	54
NW_020822468.1	37396348	37396395	p2	(AC)24	48
NW_020822468.1	41860475	41860486	p2	(AG)6	12
NW_020822468.1	48456999	48457056	p2	(TG)29	58
NW_020822469.1	1190875	1190932	p2	(GT)29	58
NW_020822469.1	3910843	3910904	p2	(TC)31	62
NW_020822469.1	5445760	5445805	p2	(TG)23	46
NW_020822469.1	5453910	5453971	p2	(GA)31	62
NW_020822471.1	7999468	7999493	p2	(AT)13	26
NW_020822471.1	7999468	7999493	p2	(AT)13	26
NW_020822474.1	210846	210901	p2	(CA)28	56
NW_020822474.1	1146099	1146146	p2	(CA)24	48
NW_020822474.1	1146099	1146146	p2	(CA)24	48
NW_020822474.1	2013142	2013187	p2	(TG)23	46
NW_020822474.1	3228888	3228931	p2	(AG)22	44
NW_020822474.1	4001002	4001053	p2	(GA)26	52
NW_020822474.1	5770743	5770782	p2	(GA)20	40
NW_020822475.1	1768099	1768144	p2	(TG)23	46
NW_020822475.1	1999927	1999940	p2	(TG)7	14
NW_020822475.1	3268716	3268773	p2	(CT)29	58
NW_020822476.1	1305921	1305978	p2	(CA)29	58
NW_020822476.1	4476549	4476598	p2	(TG)25	50
NW_020822476.1	4971578	4971627	p2	(GA)25	50
NW_020822476.1	5008288	5008313	p2	(TG)13	26
NW_020822483.1	989047	989102	p2	(GT)28	56
NW_020822484.1	658598	658661	p2	(GT)32	64
NW_020822484.1	1703831	1703844	p2	(TG)7	14
NW_020822486.1	287048	287107	p2	(AG)30	60
NW_020822486.1	2399152	2399189	p2	(GT)19	38
NW_020822486.1	3416413	3416472	p2	(GT)30	60
NW_020822486.1	3986751	3986808	p2	(AG)29	58
NW_020822486.1	12114884	12114937	p2	(GT)27	54
NW_020822486.1	14460979	14461028	p2	(CA)25	50
NW_020822486.1	15016951	15017002	p2	(TG)26	52
NW_020822486.1	16687185	16687230	p2	(GT)23	46
NW_020822486.1	16687185	16687230	p2	(GT)23	46
NW_020822486.1	17333265	17333296	p2	(CA)16	32
NW_020822486.1	19442076	19442107	p2	(CA)16	32
NW_020822486.1	22046772	22046783	p2	(CA)6	12
NW_020822486.1	24640122	24640177	p2	(GA)28	56
NW_020822486.1	26380233	26380270	p2	(AC)19	38
NW_020822486.1	27509118	27509171	p2	(TC)27	54
NW_020822487.1	8228508	8228569	p2	(TC)31	62
NW_020822487.1	8954641	8954698	p2	(CA)29	58
NW_020822487.1	17375662	17375709	p2	(TC)24	48
NW_020822487.1	17786454	17786513	p2	(TC)30	60
NW_020822487.1	18873859	18873920	p2	(CT)31	62
NW_020822487.1	19159403	19159444	p2	(AT)21	42
NW_020822487.1	19510334	19510379	p2	(AC)23	46
NW_020822487.1	19577513	19577550	p2	(AC)19	38
NW_020822487.1	21884188	21884255	p2	(CT)34	68
NW_020822487.1	22972147	22972204	p2	(AC)29	58
NW_020822487.1	24563562	24563577	p2	(GT)8	16
NW_020822487.1	24730899	24730910	p2	(TG)6	12
NW_020822487.1	25648920	25648949	p2	(AC)15	30
NW_020822487.1	26730153	26730210	p2	(TG)29	58
NW_020822487.1	27002798	27002871	p2	(AC)37	74
NW_020822487.1	28536080	28536123	p2	(TC)22	44
NW_020822487.1	28815028	28815083	p2	(AC)28	56
NW_020822488.1	1550157	1550208	p2	(TG)26	52
NW_020822493.1	425715	425770	p2	(CT)28	56
NW_020822495.1	315765	315818	p2	(AC)27	54
NW_020822499.1	577856	577869	p2	(GT)7	14
NW_020822499.1	1347844	1347907	p2	(CA)32	64
NW_020822499.1	2670448	2670509	p2	(TG)31	62
NW_020822499.1	4841845	4841908	p2	(TC)32	64
NW_020822499.1	7260250	7260331	p2	(AC)41	82
NW_020822499.1	7641541	7641580	p2	(AT)20	40
NW_020822499.1	8612779	8612844	p2	(AC)33	66
NW_020822499.1	9532066	9532081	p2	(AT)8	16
NW_020822499.1	9551261	9551292	p2	(TG)16	32
NW_020822499.1	14352017	14352062	p2	(AC)23	46
NW_020822499.1	17347666	17347677	p2	(GA)6	12
NW_020822499.1	17861455	17861514	p2	(TC)30	60
NW_020822499.1	18688961	18689026	p2	(AG)33	66
NW_020822499.1	19678286	19678335	p2	(AC)25	50
NW_020822499.1	19755058	19755107	p2	(AC)25	50
NW_020822499.1	20526601	20526634	p2	(TA)17	34
NW_020822499.1	20526601	20526634	p2	(TA)17	34
NW_020822499.1	20749288	20749311	p2	(TC)12	24
NW_020822499.1	20749288	20749311	p2	(TC)12	24
NW_020822499.1	21044272	21044327	p2	(TG)28	56
NW_020822499.1	21810305	21810344	p2	(CT)20	40
NW_020822499.1	22241292	22241353	p2	(TC)31	62
NW_020822499.1	25667824	25667861	p2	(GT)19	38
NW_020822501.1	11357034	11357091	p2	(GT)29	58
NW_020822501.1	12649070	12649123	p2	(TG)27	54
NW_020822501.1	13684049	13684096	p2	(TC)24	48
NW_020822501.1	17408026	17408085	p2	(TG)30	60
NW_020822501.1	17408026	17408085	p2	(TG)30	60
NW_020822501.1	19200300	19200395	p2	(AC)48	96
NW_020822501.1	23259017	23259060	p2	(AC)22	44
NW_020822501.1	23259017	23259060	p2	(AC)22	44
NW_020822501.1	24125742	24125807	p2	(TC)33	66
NW_020822503.1	579144	579211	p2	(AG)34	68
NW_020822503.1	1232325	1232344	p2	(CA)10	20
NW_020822503.1	1957372	1957415	p2	(AC)22	44
NW_020822503.1	2104521	2104580	p2	(CT)30	60
NW_020822503.1	4513751	4513778	p2	(GT)14	28
NW_020822503.1	6965673	6965688	p2	(AC)8	16
NW_020822503.1	8508544	8508595	p2	(TC)26	52
NW_020822503.1	13011555	13011568	p2	(CA)7	14
NW_020822503.1	13486171	13486216	p2	(GT)23	46
NW_020822503.1	13706943	13707012	p2	(AG)35	70
NW_020822503.1	13961866	13961893	p2	(AC)14	28
NW_020822503.1	14744119	14744130	p2	(TA)6	12
NW_020822503.1	16091619	16091670	p2	(AC)26	52
NW_020822503.1	17353411	17353422	p2	(GT)6	12
NW_020822504.1	3509944	3510003	p2	(AC)30	60
NW_020822504.1	4157012	4157073	p2	(TG)31	62
NW_020822504.1	4693865	4693922	p2	(AC)29	58
NW_020822504.1	9433369	9433428	p2	(TC)30	60
NW_020822504.1	17065744	17065803	p2	(CT)30	60
NW_020822505.1	618884	618929	p2	(CA)23	46
NW_020822505.1	4721896	4721957	p2	(AG)31	62
NW_020822505.1	6498924	6498983	p2	(AG)30	60
NW_020822505.1	7028266	7028323	p2	(CT)29	58
NW_020822505.1	10642531	10642584	p2	(TG)27	54
NW_020822505.1	12830251	12830262	p2	(GT)6	12
NW_020822505.1	14590233	14590274	p2	(GT)21	42
NW_020822505.1	14662400	14662455	p2	(AC)28	56
NW_020822505.1	14736509	14736556	p2	(GT)24	48
NW_020822505.1	14795544	14795611	p2	(GA)34	68
NW_020822505.1	15402499	15402530	p2	(CA)16	32
NW_020822505.1	16324721	16324768	p2	(CA)24	48
NW_020822505.1	16510208	16510267	p2	(AC)30	60
NW_020822505.1	16952082	16952123	p2	(AC)21	42
NW_020822505.1	17751363	17751416	p2	(AC)27	54
NW_020822505.1	18009530	18009579	p2	(AC)25	50
NW_020822505.1	18674464	18674499	p2	(AC)18	36
NW_020822506.1	934820	934867	p2	(AC)24	48
NW_020822506.1	934820	934867	p2	(AC)24	48
NW_020822506.1	1105132	1105183	p2	(GA)26	52
NW_020822506.1	13754821	13754902	p2	(CT)41	82
NW_020822506.1	18329881	18329930	p2	(TC)25	50
NW_020822506.1	18767711	18767724	p2	(GT)7	14
NW_020822506.1	18891370	18891415	p2	(AC)23	46
NW_020822507.1	17408239	17408298	p2	(TC)30	60
NW_020822508.1	1001326	1001369	p2	(AC)22	44
NW_020822508.1	1683713	1683776	p2	(TC)32	64
NW_020822508.1	2074816	2074827	p2	(AC)6	12
NW_020822508.1	2691751	2691762	p2	(CA)6	12
NW_020822508.1	5875965	5876030	p2	(GT)33	66
NW_020822508.1	6201624	6201677	p2	(AC)27	54
NW_020822508.1	8230041	8230074	p2	(AC)17	34
NW_020822508.1	8429828	8429841	p2	(TG)7	14
NW_020822508.1	8961088	8961099	p2	(TG)6	12
NW_020822508.1	9543294	9543357	p2	(TC)32	64
NW_020822508.1	9988209	9988258	p2	(CA)25	50
NW_020822508.1	10082023	10082080	p2	(GT)29	58
NW_020822508.1	13565300	13565361	p2	(CA)31	62
NW_020822508.1	14599647	14599682	p2	(TG)18	36
NW_020822511.1	27849	27900	p2	(AG)26	52
NW_020822511.1	4317631	4317684	p2	(GA)27	54
NW_020822511.1	7375625	7375668	p2	(AC)22	44
NW_020822511.1	7455218	7455277	p2	(GT)30	60
NW_020822511.1	7745533	7745596	p2	(AG)32	64
NW_020822511.1	9568830	9568887	p2	(TG)29	58
NW_020822512.1	4309305	4309362	p2	(TC)29	58
NW_020822512.1	5630490	5630543	p2	(GT)27	54
NW_020822512.1	6724868	6724927	p2	(TG)30	60
NW_020822512.1	7697252	7697307	p2	(TC)28	56
NW_020822513.1	652988	653085	p2	(AC)49	98
NW_020822513.1	1003621	1003676	p2	(CA)28	56
NW_020822513.1	1699955	1700008	p2	(TC)27	54
NW_020822513.1	8984353	8984412	p2	(AG)30	60
NW_020822519.1	563533	563578	p2	(AC)23	46
NW_020822519.1	6274298	6274347	p2	(AC)25	50
NW_020822519.1	10023017	10023074	p2	(AC)29	58
NW_020822519.1	11278079	11278112	p2	(GT)17	34
NW_020822519.1	11516345	11516416	p2	(AG)36	72
NW_020822519.1	19235597	19235656	p2	(AC)30	60
NW_020822519.1	19840291	19840352	p2	(AC)31	62
NW_020822519.1	20375859	20375924	p2	(AG)33	66
NW_020822519.1	21666539	21666610	p2	(GT)36	72
NW_020822519.1	23164835	23164898	p2	(TG)32	64
NW_020822519.1	24910038	24910103	p2	(AG)33	66
NW_020822519.1	25749870	25749925	p2	(GA)28	56
NW_020822519.1	26023877	26023940	p2	(CA)32	64
NW_020822519.1	26499276	26499289	p2	(GT)7	14
NW_020822519.1	28109783	28109798	p2	(TG)8	16
NW_020822519.1	29733186	29733243	p2	(AC)29	58
NW_020822520.1	462459	462484	p2	(GT)13	26
NW_020822520.1	2349130	2349181	p2	(TC)26	52
NW_020822520.1	2511156	2511203	p2	(AC)24	48
NW_020822520.1	2511156	2511203	p2	(AC)24	48
NW_020822526.1	4840281	4840330	p2	(TG)25	50
NW_020822526.1	7919078	7919137	p2	(GT)7	14
NW_020822526.1	12173954	12174013	p2	(TC)30	60
NW_020822526.1	15475983	15476024	p2	(AG)21	42
NW_020822526.1	16873747	16873810	p2	(AG)32	64
NW_020822526.1	17379657	17379686	p2	(CA)15	30
NW_020822526.1	17494064	17494095	p2	(AC)16	32
NW_020822526.1	18794311	18794362	p2	(AC)26	52
NW_020822526.1	18840163	18840216	p2	(CA)27	54
NW_020822526.1	18992965	18993034	p2	(AG)35	70
NW_020822526.1	19090301	19090348	p2	(GT)24	48
NW_020822526.1	21064013	21064028	p2	(CA)8	16
NW_020822526.1	21317306	21317321	p2	(TG)8	16
NW_020822526.1	22176889	22176950	p2	(TG)31	62
NW_020822526.1	24184374	24184419	p2	(TG)23	46
NW_020822526.1	24206383	24206442	p2	(GT)30	60
NW_020822526.1	25646840	25646853	p2	(CA)7	14
NW_020822526.1	26304061	26304076	p2	(TG)8	16
NW_020822529.1	3105925	3105982	p2	(AC)29	58
NW_020822529.1	3236981	3236992	p2	(CT)6	12
NW_020822529.1	8943426	8943481	p2	(AG)28	56
NW_020822529.1	9628364	9628411	p2	(AC)24	48
NW_020822529.1	10178084	10178115	p2	(TG)16	32
NW_020822529.1	11810442	11810485	p2	(AC)22	44
NW_020822529.1	12613775	12613786	p2	(CA)6	12
NW_020822529.1	16865510	16865563	p2	(TC)27	54
NW_020822529.1	26364395	26364406	p2	(AC)6	12
NW_020822529.1	28253356	28253401	p2	(TG)23	46
NW_020822529.1	30235550	30235607	p2	(CA)29	58
NW_020822529.1	30951692	30951725	p2	(AC)17	34
NW_020822529.1	32985000	32985047	p2	(AC)24	48
NW_020822529.1	34439652	34439703	p2	(GA)26	52
NW_020822529.1	34458882	34458937	p2	(TG)28	56
NW_020822529.1	35462912	35462975	p2	(TG)32	64
NW_020822529.1	37322875	37322890	p2	(AC)8	16
NW_020822529.1	46505554	46505601	p2	(AC)24	48
NW_020822529.1	46505554	46505601	p2	(AC)24	48
NW_020822529.1	55014885	55014950	p2	(AC)33	66
NW_020822529.1	55366444	55366501	p2	(AC)29	58
NW_020822529.1	57195732	57195747	p2	(CA)8	16
NW_020822529.1	60832420	60832477	p2	(TG)29	58
NW_020822529.1	62818978	62818989	p2	(GT)6	12
NW_020822529.1	63565476	63565487	p2	(CA)6	12
NW_020822530.1	3451112	3451163	p2	(GT)26	52
NW_020822530.1	10618046	10618089	p2	(TG)22	44
NW_020822530.1	10618046	10618089	p2	(TG)22	44
NW_020822531.1	1037378	1037465	p2	(GT)44	88
NW_020822531.1	3308298	3308371	p2	(AG)37	74
NW_020822531.1	4120402	4120459	p2	(AG)29	58
NW_020822531.1	4212202	4212253	p2	(TC)26	52
NW_020822531.1	6287493	6287546	p2	(AC)27	54
NW_020822531.1	8834270	8834325	p2	(TC)28	56
NW_020822531.1	9987524	9987567	p2	(AC)22	44
NW_020822531.1	11356534	11356585	p2	(GT)26	52
NW_020822531.1	11853659	11853712	p2	(TG)27	54
NW_020822531.1	12656908	12656965	p2	(GA)29	58
NW_020822532.1	675027	675058	p2	(AT)16	32
NW_020822532.1	1279473	1279488	p2	(CA)8	16
NW_020822532.1	2750970	2751029	p2	(TC)30	60
NW_020822532.1	4511020	4511075	p2	(AG)28	56
NW_020822532.1	6383749	6383814	p2	(TC)33	66
NW_020822532.1	12682457	12682508	p2	(GT)26	52
NW_020822533.1	205439	205450	p2	(CA)6	12
NW_020822533.1	1358488	1358547	p2	(GA)30	60
NW_020822533.1	1688518	1688567	p2	(GT)25	50
NW_020822533.1	2612487	2612546	p2	(GT)30	60
NW_020822533.1	3032455	3032506	p2	(AC)26	52
NW_020822533.1	3372175	3372206	p2	(AC)16	32
NW_020822533.1	6500446	6500497	p2	(GT)26	52
NW_020822533.1	7159486	7159525	p2	(GT)20	40
NW_020822533.1	8736060	8736097	p2	(AC)19	38
NW_020822533.1	9900982	9901067	p2	(TG)43	86
NW_020822533.1	11820772	11820827	p2	(GT)28	56
NW_020822534.1	48902	48959	p2	(CA)29	58
NW_020822534.1	55156	55225	p2	(TG)35	70
NW_020822534.1	2970514	2970567	p2	(TC)27	54
NW_020822534.1	8039850	8039901	p2	(TC)26	52
NW_020822534.1	10137044	10137097	p2	(CA)27	54
NW_020822535.1	1279603	1279690	p2	(TG)44	88
NW_020822535.1	8311985	8312038	p2	(GT)27	54
NW_020822536.1	42495	42538	p2	(TG)22	44
NW_020822537.1	400260	400293	p2	(AC)17	34
NW_020822537.1	3606972	3607017	p2	(TC)23	46
NW_020822537.1	7242748	7242787	p2	(TG)20	40
NW_020822537.1	7403080	7403123	p2	(TG)22	44
NW_020822537.1	7560912	7560973	p2	(TG)31	62
NW_020822538.1	1120075	1120138	p2	(TG)32	64
NW_020822538.1	1191184	1191217	p2	(TG)17	34
NW_020822538.1	1393139	1393190	p2	(TG)26	52
NW_020822538.1	5396495	5396538	p2	(GT)22	44
NW_020822538.1	7406099	7406110	p2	(TG)6	12
NW_020822539.1	3472621	3472674	p2	(AC)27	54
NW_020822544.1	4134366	4134409	p2	(TG)22	44
NW_020822545.1	2725813	2725866	p2	(AC)27	54
NW_020822545.1	4072747	4072798	p2	(AC)26	52
NW_020822545.1	5326983	5326996	p2	(GT)7	14
NW_020822550.1	1726149	1726202	p2	(AC)27	54
NW_020822550.1	2054914	2054981	p2	(GT)34	68
NW_020822550.1	3331225	3331278	p2	(GA)27	54
NW_020822552.1	3157259	3157284	p2	(AT)13	26
NW_020822555.1	48673	48724	p2	(AG)26	52
NW_020822555.1	1121747	1121798	p2	(CT)26	52
NW_020822557.1	2341648	2341693	p2	(CA)23	46
NW_020822559.1	2647229	2647280	p2	(GA)26	52
NW_020822567.1	1362703	1362750	p2	(GA)24	48
NW_020822567.1	2754844	2754917	p2	(GA)37	74
NW_020822567.1	2772572	2772629	p2	(CT)29	58
NW_020822567.1	3062112	3062125	p2	(CA)7	14
NW_020822567.1	4418182	4418239	p2	(TG)29	58
NW_020822567.1	6814069	6814134	p2	(TC)33	66
NW_020822567.1	6942367	6942414	p2	(AC)24	48
NW_020822567.1	8417403	8417462	p2	(AG)30	60
NW_020822567.1	9505716	9505783	p2	(GA)34	68
NW_020822567.1	13297192	13297227	p2	(GT)18	36
NW_020822567.1	19821563	19821626	p2	(CA)32	64
NW_020822567.1	21700422	21700433	p2	(TG)6	12
NW_020822567.1	25475055	25475102	p2	(TG)24	48
NW_020822567.1	32970695	32970760	p2	(AC)33	66
NW_020822567.1	37587224	37587275	p2	(AC)26	52
NW_020822567.1	39712209	39712266	p2	(CA)29	58
NW_020822567.1	41357727	41357766	p2	(AC)20	40
NW_020822567.1	42173492	42173525	p2	(AC)17	34
NW_020822567.1	42472543	42472604	p2	(AC)31	62
NW_020822567.1	43009401	43009448	p2	(CT)24	48
NW_020822567.1	44476271	44476360	p2	(GT)45	90
NW_020822567.1	45806666	45806713	p2	(TG)24	48
NW_020822567.1	46902362	46902453	p2	(GT)46	92
NW_020822567.1	47565039	47565080	p2	(AC)21	42
NW_020822567.1	50334998	50335069	p2	(TC)36	72
NW_020822567.1	52176063	52176106	p2	(CA)22	44
NW_020822567.1	53628127	53628180	p2	(AC)27	54
NW_020822567.1	56066653	56066706	p2	(TG)27	54
NW_020822567.1	58929038	58929091	p2	(TG)27	54
NW_020822567.1	61626410	61626451	p2	(TG)21	42
NW_020822567.1	64753080	64753091	p2	(TG)6	12
NW_020822567.1	64824261	64824274	p2	(GT)7	14
NW_020822567.1	65503908	65503963	p2	(GA)28	56
NW_020822567.1	66230017	66230076	p2	(AG)30	60
NW_020822567.1	67086877	67086928	p2	(TC)26	52
NW_020822567.1	68784039	68784088	p2	(CA)25	50
NW_020822570.1	842568	842611	p2	(AC)22	44
NW_020822570.1	2411961	2411994	p2	(TG)17	34
NW_020822570.1	3800606	3800661	p2	(AG)28	56
NW_020822570.1	5826952	5827001	p2	(AG)25	50
NW_020822570.1	13215774	13215787	p2	(CA)7	14
NW_020822570.1	14623181	14623244	p2	(CT)32	64
NW_020822570.1	16181999	16182050	p2	(AC)26	52
NW_020822570.1	16906685	16906746	p2	(TG)31	62
NW_020822570.1	21823442	21823497	p2	(TG)28	56
NW_020822570.1	21823442	21823497	p2	(TG)28	56
NW_020822577.1	1900718	1900775	p2	(TC)29	58
NW_020822577.1	4576708	4576769	p2	(GT)7	14
NW_020822577.1	8179811	8179880	p2	(TG)35	70
NW_020822577.1	14353635	14353666	p2	(TG)16	32
NW_020822577.1	15989175	15989230	p2	(AG)28	56
NW_020822586.1	3837361	3837406	p2	(GT)23	46
NW_020822586.1	4172042	4172093	p2	(AC)26	52
NW_020822586.1	4583328	4583385	p2	(TG)29	58
NW_020822586.1	6727752	6727823	p2	(AC)36	72
NW_020822591.1	14875	14942	p2	(GA)34	68
NW_020822591.1	4685683	4685742	p2	(CT)30	60
NW_020822591.1	4834552	4834563	p2	(GT)6	12
NW_020822591.1	5607934	5607973	p2	(GT)20	40
NW_020822591.1	7514021	7514080	p2	(TC)30	60
NW_020822591.1	8643439	8643450	p2	(GT)6	12
NW_020822592.1	2016980	2017031	p2	(AC)26	52
NW_020822592.1	2809212	2809253	p2	(AC)21	42
NW_020822592.1	4061072	4061133	p2	(AC)31	62
NW_020822592.1	4061072	4061133	p2	(AC)31	62
NW_020822592.1	4761166	4761239	p2	(AC)37	74
NW_020822592.1	4761166	4761239	p2	(AC)37	74
NW_020822592.1	7152640	7152701	p2	(TG)31	62
NW_020822592.1	7830444	7830491	p2	(CT)24	48
NW_020822595.1	6379145	6379192	p2	(AG)24	48
NW_020822595.1	6522261	6522328	p2	(AC)34	68
NW_020822596.1	1383517	1383566	p2	(TG)25	50
NW_020822596.1	2686983	2687022	p2	(CA)20	40
NW_020822597.1	2933998	2934045	p2	(TC)24	48
NW_020822597.1	5771797	5771858	p2	(TG)31	62
NW_020822597.1	6448496	6448511	p2	(CA)8	16
NW_020822597.1	8351592	8351611	p2	(TC)10	20
NW_020822597.1	10413296	10413359	p2	(CT)32	64
NW_020822597.1	15485797	15485840	p2	(TG)22	44
NW_020822597.1	18980481	18980546	p2	(TC)33	66
NW_020822597.1	20678682	20678735	p2	(GA)27	54
NW_020822597.1	30071877	30071898	p2	(GA)11	22
NW_020822597.1	31052655	31052666	p2	(TC)6	12
NW_020822597.1	37190943	37190998	p2	(CA)28	56
NW_020822597.1	37635973	37636024	p2	(GA)26	52
NW_020822598.1	2376689	2376746	p2	(AG)29	58
NW_020822598.1	2807601	2807614	p2	(TC)7	14
NW_020822601.1	656381	656398	p2	(GT)9	18
NW_020822601.1	905971	906018	p2	(CA)24	48
NW_020822601.1	2233878	2233945	p2	(CA)34	68
NW_020822601.1	3850132	3850145	p2	(TA)7	14
NW_020822601.1	7159253	7159346	p2	(GT)47	94
NW_020822601.1	7159253	7159346	p2	(GT)47	94
NW_020822601.1	8388659	8388706	p2	(GT)24	48
NW_020822601.1	8442337	8442420	p2	(TC)42	84
NW_020822601.1	12722776	12722857	p2	(TC)41	82
NW_020822601.1	14438663	14438730	p2	(AC)34	68
NW_020822601.1	18143270	18143285	p2	(TG)8	16
NW_020822601.1	22496562	22496611	p2	(AG)25	50
NW_020822601.1	23219143	23219182	p2	(CT)20	40
NW_020822601.1	25013598	25013661	p2	(AC)32	64
NW_020822601.1	26348090	26348143	p2	(TG)27	54
NW_020822601.1	26348090	26348143	p2	(TG)27	54
NW_020822601.1	28377174	28377225	p2	(AC)26	52
NW_020822601.1	35221921	35221990	p2	(CA)35	70
NW_020822601.1	35679972	35680031	p2	(GA)30	60
NW_020822601.1	35959723	35959780	p2	(TC)29	58
NW_020822601.1	40307602	40307661	p2	(AG)30	60
NW_020822601.1	42916279	42916326	p2	(AC)24	48
NW_020822601.1	45537756	45537767	p2	(AC)6	12
NW_020822601.1	45684373	45684384	p2	(GT)6	12
NW_020822601.1	49377490	49377503	p2	(TG)7	14
NW_020822601.1	49428831	49428844	p2	(AC)7	14
NW_020822601.1	51936613	51936668	p2	(TC)28	56
NW_020822601.1	52383481	52383548	p2	(CA)34	68
NW_020822601.1	56885653	56885708	p2	(GT)28	56
NW_020822601.1	56940417	56940468	p2	(TC)26	52
NW_020822601.1	58390015	58390080	p2	(TG)33	66
NW_020822601.1	58654805	58654860	p2	(CA)28	56
NW_020822601.1	61385904	61385941	p2	(AC)19	38
NW_020822601.1	63066045	63066102	p2	(AC)29	58
NW_020822601.1	64711082	64711145	p2	(AC)32	64
NW_020822601.1	65723920	65723931	p2	(GT)6	12
NW_020822601.1	66205259	66205304	p2	(GT)23	46
NW_020822601.1	66299777	66299824	p2	(AC)24	48
NW_020822601.1	67895739	67895790	p2	(TG)26	52
NW_020822601.1	70762193	70762256	p2	(AG)32	64
NW_020822601.1	71669586	71669651	p2	(CT)33	66
NW_020822601.1	72176322	72176337	p2	(CA)8	16
NW_020822601.1	72538848	72538905	p2	(TC)29	58
NW_020822602.1	856879	856934	p2	(CA)28	56
NW_020822602.1	6751042	6751101	p2	(TC)30	60
NW_020822602.1	8497719	8497764	p2	(AC)23	46
NW_020822603.1	2361157	2361196	p2	(AT)20	40
NW_020822603.1	7095622	7095669	p2	(GT)8	16
NW_020822603.1	7095622	7095669	p2	(GT)8	16
NW_020822603.1	8554327	8554378	p2	(CT)26	52
NW_020822603.1	8554327	8554378	p2	(CT)26	52
NW_020822603.1	9112469	9112518	p2	(AC)25	50
NW_020822604.1	5585893	5585954	p2	(CA)31	62
NW_020822604.1	8845677	8845688	p2	(GT)6	12
NW_020822606.1	2861210	2861253	p2	(GT)22	44
NW_020822606.1	2861210	2861253	p2	(GT)22	44
NW_020822607.1	1449625	1449680	p2	(GT)28	56
NW_020822608.1	520045	520114	p2	(GT)35	70
NW_020822608.1	1465635	1465706	p2	(TC)36	72
NW_020822608.1	2810445	2810506	p2	(GT)31	62
NW_020822608.1	4389303	4389352	p2	(TG)25	50
NW_020822608.1	5348413	5348472	p2	(AC)30	60
NW_020822608.1	12704173	12704238	p2	(AG)33	66
NW_020822608.1	15618168	15618223	p2	(CT)28	56
NW_020822608.1	17768128	17768181	p2	(TC)27	54
NW_020822608.1	17786182	17786235	p2	(TG)27	54
NW_020822608.1	18323585	18323598	p2	(TG)7	14
NW_020822610.1	454240	454303	p2	(AC)32	64
NW_020822610.1	821804	821857	p2	(AC)27	54
NW_020822610.1	821804	821857	p2	(AC)27	54
NW_020822610.1	2844686	2844697	p2	(TG)6	12
NW_020822610.1	2965032	2965091	p2	(CT)30	60
NW_020822610.1	4528963	4528998	p2	(GT)18	36
NW_020822610.1	4827922	4827973	p2	(GT)26	52
NW_020822610.1	16359366	16359411	p2	(TC)23	46
NW_020822610.1	17283585	17283650	p2	(GA)33	66
NW_020822611.1	3749259	3749322	p2	(CT)32	64
NW_020822611.1	3864654	3864695	p2	(GT)21	42
NW_020822611.1	9406128	9406185	p2	(GA)29	58
NW_020822611.1	13161885	13161938	p2	(TC)27	54
NW_020822614.1	3514769	3514818	p2	(AC)25	50
NW_020822615.1	3259290	3259353	p2	(CA)32	64
NW_020822615.1	3739900	3739941	p2	(GT)21	42
NW_020822615.1	3739900	3739941	p2	(GT)21	42
NW_020822615.1	4852192	4852243	p2	(CA)26	52
NW_020822615.1	5841234	5841295	p2	(GT)31	62
NW_020822615.1	7060287	7060354	p2	(GA)34	68
NW_020822615.1	10765282	10765337	p2	(AG)28	56
NW_020822615.1	11200174	11200235	p2	(TC)31	62
NW_020822615.1	11890274	11890329	p2	(GT)28	56
NW_020822615.1	11890274	11890329	p2	(GT)28	56
NW_020822615.1	13101442	13101503	p2	(TC)31	62
NW_020822615.1	13101442	13101503	p2	(TC)31	62
NW_020822615.1	14193401	14193472	p2	(TG)36	72
NW_020822615.1	14457817	14457868	p2	(CA)26	52
NW_020822615.1	17183024	17183073	p2	(CT)25	50
NW_020822615.1	20544302	20544363	p2	(TC)31	62
NW_020822615.1	22894818	22894863	p2	(CT)23	46
NW_020822615.1	22894818	22894863	p2	(CT)23	46
NW_020822615.1	25085806	25085853	p2	(TG)24	48
NW_020822615.1	38614404	38614461	p2	(GA)29	58
NW_020822618.1	1597863	1597918	p2	(CA)28	56
NW_020822619.1	2284902	2284961	p2	(CA)30	60
NW_020822619.1	3162155	3162198	p2	(TG)23	46
NW_020822627.1	412926	412983	p2	(GT)29	58
NW_020822629.1	1080064	1080113	p2	(AC)25	50
NW_020822629.1	3429037	3429086	p2	(CT)25	50
NW_020822629.1	5127649	5127704	p2	(AG)28	56
NW_020822629.1	6170819	6170862	p2	(CA)22	44
NW_020822629.1	6170819	6170862	p2	(CA)22	44
NW_020822629.1	11563574	11563619	p2	(GT)23	46
NW_020822629.1	15493103	15493116	p2	(CA)7	14
NW_020822630.1	4577077	4577142	p2	(GA)33	66
NW_020822630.1	8076292	8076341	p2	(GT)25	50
NW_020822630.1	9804652	9804669	p2	(AG)7	14
NW_020822631.1	25102	25161	p2	(AC)30	60
NW_020822632.1	11061767	11061836	p2	(AC)35	70
NW_020822634.1	2791562	2791627	p2	(TC)33	66
NW_020822634.1	5192204	5192251	p2	(CA)24	48
NW_020822634.1	7211093	7211160	p2	(AC)34	68
NW_020822634.1	8488731	8488784	p2	(TG)27	54
NW_020822634.1	8633061	8633114	p2	(TG)27	54
NW_020822636.1	3960551	3960608	p2	(AG)29	58
NW_020822638.1	3029974	3030015	p2	(AC)21	42
NW_020822641.1	1253140	1253197	p2	(TG)29	58
NW_020822641.1	1286135	1286190	p2	(GT)28	56
NW_020822641.1	6729536	6729597	p2	(GA)31	62
NW_020822643.1	2770888	2770951	p2	(GA)32	64
NW_020822646.1	26406	26461	p2	(GT)28	56
NW_020822657.1	11961963	11962018	p2	(TA)18	36
NW_020822657.1	15522549	15522568	p2	(AG)10	20
NW_020822658.1	193375	193434	p2	(GT)30	60
NW_020822658.1	5476972	5477029	p2	(AC)29	58
NW_020822658.1	5573280	5573337	p2	(GA)29	58
NW_020822666.1	2107219	2107264	p2	(CA)23	46
NW_020822666.1	3724721	3724802	p2	(GA)41	82
NW_020822672.1	978465	978520	p2	(AC)28	56
NW_020822687.1	14895820	14895871	p2	(TG)26	52
NW_020822688.1	23209028	23209061	p2	(GT)17	34
NW_020822698.1	121314	121373	p2	(TG)30	60
NW_020822698.1	6755621	6755674	p2	(GT)27	54
NW_020822698.1	9141936	9141977	p2	(CA)21	42
NW_020822703.1	6176558	6176627	p2	(AG)35	70
NW_020822703.1	7228007	7228056	p2	(GT)25	50
NW_020822764.1	15774	15815	p2	(AC)21	42
NW_020822785.1	9530	9557	p2	(CA)14	28
NW_020822806.1	28634	28667	p2	(CA)17	34
NW_020822967.1	23670	23703	p2	(CA)17	34
NW_020823315.1	13990	14023	p2	(GA)17	34
NW_020823418.1	956	967	p2	(CA)6	12
NW_020823472.1	70202	70249	p2	(GT)24	48
NW_020823477.1	45485	45530	p2	(TG)23	46
NW_020823498.1	232811	232856	p2	(AC)23	46
NW_020823531.1	43932	43987	p2	(AC)28	56
NW_020823531.1	97485	97528	p2	(AG)22	44
NW_020823542.1	65658	65701	p2	(AC)22	44
NW_020823601.1	15067	15114	p2	(TG)24	48
NW_020823657.1	44528	44567	p2	(TG)20	40
NW_020823721.1	46726	46739	p2	(CA)7	14
NW_020823768.1	45551	45602	p2	(TC)26	52
NW_020823950.1	44081	44126	p2	(GT)23	46
NW_020823957.1	20439	20456	p2	(TC)15	30
NW_020823994.1	8517	8560	p2	(AG)22	44
NW_020824031.1	35795	35840	p2	(AC)23	46
NW_020824043.1	38374	38413	p2	(TC)20	40
NW_020824065.1	8947	8994	p2	(GA)24	48
NW_020824065.1	30035	30046	p2	(AG)6	12
NW_020824133.1	32141	32184	p2	(TC)22	44
NW_020822409.1	5651189	5651224	p3	(AAT)12	36
NW_020822410.1	9545624	9545701	p3	(TTC)26	78
NW_020822415.1	16052928	16052942	p3	(ACA)5	15
NW_020822415.1	16052928	16052942	p3	(ACA)5	15
NW_020822415.1	30988411	30988428	p3	(TTG)6	18
NW_020822426.1	3827365	3827454	p3	(TCT)30	90
NW_020822429.1	2367946	2368014	p3	(TAA)23	69
NW_020822432.1	7979551	7979592	p3	(TAA)14	42
NW_020822439.1	776371	776406	p3	(AAT)12	36
NW_020822439.1	16919239	16919337	p3	(TCT)33	99
NW_020822439.1	18793736	18793789	p3	(AAT)18	54
NW_020822439.1	55256446	55256487	p3	(TTA)14	42
NW_020822452.1	13899241	13899312	p3	(TTC)24	72
NW_020822459.1	121395	121442	p3	(ATA)16	48
NW_020822459.1	10822660	10822758	p3	(CTT)33	99
NW_020822484.1	754929	754949	p3	(TAT)7	21
NW_020822486.1	27289610	27289645	p3	(TAA)12	36
NW_020822499.1	13032655	13032741	p3	(TTC)29	87
NW_020822499.1	16894387	16894401	p3	(TTA)5	15
NW_020822501.1	14044688	14044708	p3	(TTG)7	21
NW_020822501.1	14071141	14071176	p3	(TTA)12	36
NW_020822503.1	2447893	2447907	p3	(AAC)5	15
NW_020822503.1	20057150	20057185	p3	(TAA)12	36
NW_020822505.1	19047054	19047086	p3	(CCT)11	33
NW_020822505.1	19047054	19047086	p3	(CCT)11	33
NW_020822513.1	1917119	1917133	p3	(TTG)5	15
NW_020822526.1	18934113	18934127	p3	(TTG)5	15
NW_020822530.1	704774	704788	p3	(CTT)5	15
NW_020822544.1	4160113	4160127	p3	(AAC)5	15
NW_020822567.1	35571858	35571881	p3	(TCT)8	24
NW_020822570.1	5121168	5121209	p3	(TGA)14	42
NW_020822591.1	7471000	7471047	p3	(ATT)16	48
NW_020822597.1	2600174	2600209	p3	(ATA)12	36
NW_020822597.1	9085521	9085559	p3	(ATA)13	39
NW_020822601.1	11777930	11778025	p3	(AAG)32	96
NW_020822601.1	25483137	25483229	p3	(TCT)31	93
NW_020822601.1	59527236	59527250	p3	(ATT)5	15
NW_020822601.1	64277903	64277926	p3	(CTC)8	24
NW_020822601.1	70337322	70337336	p3	(AAC)5	15
NW_020822630.1	12932132	12932194	p3	(CTT)21	63
NW_020822644.1	1197149	1197166	p3	(AAC)6	18
NW_020822687.1	17657407	17657421	p3	(TTC)5	15
NW_020822703.1	7806244	7806258	p3	(AAC)5	15
NW_020823044.1	10659	10676	p3	(TTG)6	18
NW_020823044.1	10659	10676	p3	(TTG)6	18
NW_020823538.1	126041	126064	p3	(TAT)8	24
NW_020822370.1	14726527	14726590	p4	(TTCT)16	64
NW_020822375.1	4653265	4653312	p4	(TAAA)12	48
NW_020822375.1	23552169	23552188	p4	(CAAA)5	20
NW_020822379.1	1635306	1635333	p4	(TTTG)7	28
NW_020822381.1	1104010	1104029	p4	(AACA)5	20
NW_020822382.1	3087331	3087350	p4	(CCTC)5	20
NW_020822403.1	2561952	2562015	p4	(AAAG)16	64
NW_020822407.1	7711793	7711816	p4	(AAAC)6	24
NW_020822409.1	8693081	8693136	p4	(ATAC)14	56
NW_020822415.1	16369167	16369222	p4	(AAGG)14	56
NW_020822415.1	51187280	51187307	p4	(TTTG)7	28
NW_020822415.1	56395643	56395670	p4	(TTTG)7	28
NW_020822423.1	10339571	10339590	p4	(TTAT)5	20
NW_020822428.1	5836864	5836903	p4	(TCCT)10	40
NW_020822428.1	8085368	8085411	p4	(TCCT)11	44
NW_020822435.1	740675	740698	p4	(TTTG)6	24
NW_020822438.1	31284205	31284256	p4	(TTTA)13	52
NW_020822439.1	2569562	2569597	p4	(AAAT)9	36
NW_020822439.1	14184638	14184665	p4	(AAAC)7	28
NW_020822439.1	17604993	17605012	p4	(TTTC)5	20
NW_020822439.1	17884449	17884492	p4	(AGAT)11	44
NW_020822439.1	18959822	18959841	p4	(TTTC)5	20
NW_020822439.1	56112836	56112887	p4	(AGAT)13	52
NW_020822439.1	56671578	56671641	p4	(AGAT)16	64
NW_020822446.1	457013	457036	p4	(ATCA)6	24
NW_020822450.1	6680880	6680935	p4	(GAAA)14	56
NW_020822454.1	19278894	19278937	p4	(AATA)11	44
NW_020822459.1	918387	918442	p4	(GATA)14	56
NW_020822460.1	5239462	5239513	p4	(AGAT)13	52
NW_020822460.1	5967819	5967842	p4	(TTAT)6	24
NW_020822461.1	8819568	8819611	p4	(TCTA)11	44
NW_020822461.1	10085688	10085743	p4	(TTCC)14	56
NW_020822461.1	19607507	19607554	p4	(TCTA)12	48
NW_020822461.1	21799215	21799278	p4	(TCTT)16	64
NW_020822468.1	44891636	44891695	p4	(AAAG)15	60
NW_020822469.1	1943652	1943683	p4	(CTAT)8	32
NW_020822469.1	1960432	1960467	p4	(AAAC)9	36
NW_020822469.1	3552254	3552285	p4	(GATG)8	32
NW_020822469.1	7890894	7890913	p4	(CTTT)5	20
NW_020822470.1	9502416	9502451	p4	(TATG)9	36
NW_020822487.1	17599540	17599583	p4	(GTAT)11	44
NW_020822499.1	10821718	10821749	p4	(TTGT)8	32
NW_020822503.1	576650	576681	p4	(ATCT)8	32
NW_020822503.1	10248356	10248411	p4	(CTTT)14	56
NW_020822503.1	13994055	13994094	p4	(AAAG)10	40
NW_020822503.1	19439351	19439378	p4	(TATC)7	28
NW_020822503.1	20815381	20815420	p4	(CTTT)10	40
NW_020822504.1	13319832	13319851	p4	(TGTA)5	20
NW_020822505.1	17038339	17038374	p4	(TTTG)9	36
NW_020822508.1	2728602	2728641	p4	(TATC)10	40
NW_020822508.1	2728602	2728641	p4	(TATC)10	40
NW_020822508.1	10130726	10130769	p4	(AGAA)11	44
NW_020822508.1	14442471	14442494	p4	(AAAT)6	24
NW_020822508.1	15865682	15865733	p4	(GAAG)13	52
NW_020822508.1	15865682	15865733	p4	(GAAG)13	52
NW_020822519.1	29981765	29981844	p4	(CCTT)20	80
NW_020822526.1	4205718	4205761	p4	(ATGT)11	44
NW_020822526.1	14664459	14664506	p4	(TTTA)12	48
NW_020822526.1	17942616	17942671	p4	(CTTT)14	56
NW_020822526.1	20608836	20608875	p4	(ATAG)10	40
NW_020822526.1	22400247	22400270	p4	(TTGG)6	24
NW_020822529.1	28812619	28812662	p4	(TCTA)11	44
NW_020822530.1	5333525	5333568	p4	(CTAT)11	44
NW_020822533.1	1450475	1450514	p4	(AAAG)10	40
NW_020822567.1	7331508	7331555	p4	(AAAG)12	48
NW_020822567.1	12717766	12717821	p4	(CCTT)14	56
NW_020822567.1	13471912	13471955	p4	(ACAT)11	44
NW_020822567.1	34908763	34908782	p4	(TTGT)5	20
NW_020822567.1	36623354	36623401	p4	(ATCT)12	48
NW_020822570.1	929312	929363	p4	(AAAG)13	52
NW_020822570.1	4822569	4822624	p4	(ATCT)14	56
NW_020822591.1	7123770	7123793	p4	(TATT)6	24
NW_020822591.1	7780603	7780634	p4	(TAAA)8	32
NW_020822591.1	8820172	8820215	p4	(TTAT)11	44
NW_020822595.1	5415620	5415643	p4	(CAAA)6	24
NW_020822597.1	10923617	10923644	p4	(AAAG)7	28
NW_020822597.1	26052713	26052736	p4	(GGAG)6	24
NW_020822597.1	31512576	31512595	p4	(AACA)5	20
NW_020822597.1	33703024	33703043	p4	(TCTG)5	20
NW_020822597.1	34273689	34273736	p4	(AAAG)12	48
NW_020822601.1	56438024	56438063	p4	(AAAT)10	40
NW_020822602.1	9765403	9765430	p4	(AATA)7	28
NW_020822602.1	10831502	10831545	p4	(TTTA)11	44
NW_020822604.1	2585636	2585663	p4	(AAAC)7	28
NW_020822604.1	8345700	8345783	p4	(TCTT)21	84
NW_020822608.1	16453377	16453440	p4	(AAAG)16	64
NW_020822614.1	7096133	7096172	p4	(TATC)10	40
NW_020822614.1	8982271	8982334	p4	(ATAG)16	64
NW_020822615.1	3540582	3540605	p4	(ACCC)6	24
NW_020822615.1	4389087	4389106	p4	(AAAG)5	20
NW_020822615.1	5738552	5738619	p4	(TCTT)17	68
NW_020822615.1	10706139	10706162	p4	(ACCC)6	24
NW_020822629.1	14194746	14194765	p4	(TTTG)5	20
NW_020822657.1	14651789	14651848	p4	(AGAA)15	60
NW_020822657.1	14651789	14651848	p4	(AGAA)15	60
NW_020822658.1	7596170	7596209	p4	(TCTT)10	40
NW_020822827.1	12240	12271	p4	(TATT)8	32
NW_020822909.1	979	1010	p4	(AAGG)8	32
NW_020823541.1	39950	39973	p4	(CTTC)6	24
NW_020823757.1	5261	5304	p4	(TTTA)11	44
NW_020823787.1	26341	26380	p4	(ATTT)10	40
NW_020823873.1	34469	34500	p4	(ATAC)8	32
NW_020823873.1	34469	34500	p4	(ATAC)8	32

## Sheet: S12 Filter 1
Supplemental Table S12: Indel loci with higher mutation frequencies in 30 mM ammonia-stressed cultures.
#CHROM	POS	QUAL	10 mM Mutation Score	10 mM Allelic Depth	30 mM Mutation Score	30 Allelic Depth	Ctrl Mutation Score	Ctrl Allelic Depth	10 mM Relative Mut	30 mM Relative Mut	10<30?
NW_020822366.1	11994	708.69	91.6667	12	100	12	87.5	8	4.16667	12.5	ACCEPT
NW_020822366.1	35722	110.03	12.5	24	29.4118	17	8.33333	12	4.16667	21.0784	ACCEPT
NW_020822366.1	69299	129.2	20	10	50	18	0	9	20	50	ACCEPT
NW_020822366.1	81029	114.88	23.0769	13	33.3333	15	0	7	23.0769	33.3333	ACCEPT
NW_020822366.1	152230	132.88	15.3846	13	40.9091	22	5.55556	18	9.82906	35.3535	ACCEPT
NW_020822366.1	162048	927.23	85	20	100	15	73.3333	15	11.6667	26.6667	ACCEPT
NW_020822366.1	186882	85.66	12.5	16	25.8065	31	0	6	12.5	25.8065	ACCEPT
NW_020822366.1	593381	189.12	27.7778	18	38.8889	18	0	15	27.7778	38.8889	ACCEPT
NW_020822366.1	652705	68.13	16.6667	18	31.25	16	0	13	16.6667	31.25	ACCEPT
NW_020822366.1	1090741	141.56	11.1111	27	30.4348	23	0	20	11.1111	30.4348	ACCEPT
NW_020822366.1	1092967	97.14	13.7931	29	21.0526	38	0	15	13.7931	21.0526	ACCEPT
NW_020822366.1	1183794	38.24	20	15	42.8571	7	0	7	20	42.8571	ACCEPT
NW_020822366.1	1252095	76.64	15.7895	19	28.5714	21	7.14286	14	8.64662	21.4286	ACCEPT
NW_020822366.1	1367629	42.18	5.88235	17	20	20	0	12	5.88235	20	ACCEPT
NW_020822366.1	1400721	83.9	21.4286	14	23.8095	21	0	13	21.4286	23.8095	ACCEPT
NW_020822366.1	1463385	103.74	18.1818	11	46.6667	15	10	10	8.18182	36.6667	ACCEPT
NW_020822366.1	1514195	405.25	40.7407	27	45.4545	22	6.25	16	34.4907	39.2045	ACCEPT
NW_020822366.1	1544574	460.13	75	8	100	10	57.1429	7	17.8571	42.8571	ACCEPT
NW_020822366.1	1555180	36.09	3.57143	28	19.3548	31	0	23	3.57143	19.3548	ACCEPT
NW_020822366.1	1604334	32.21	13.6364	22	21.0526	19	0	19	13.6364	21.0526	ACCEPT
NW_020822366.1	1635819	50.33	15.7895	19	25	24	0	9	15.7895	25	ACCEPT
NW_020822366.1	1752195	80.12	17.3913	23	20	10	0	14	17.3913	20	ACCEPT
NW_020822366.1	1833594	32.09	3.33333	30	14.2857	28	0	13	3.33333	14.2857	ACCEPT
NW_020822366.1	1873278	70.75	8.33333	12	33.3333	21	0	9	8.33333	33.3333	ACCEPT
NW_020822366.1	1912356	101.13	23.0769	13	30	10	0	11	23.0769	30	ACCEPT
NW_020822366.1	2010653	42.09	3.0303	33	20	20	0	25	3.0303	20	ACCEPT
NW_020822366.1	2034430	267.38	85.7143	7	91.6667	12	33.3333	9	52.381	58.3333	ACCEPT
NW_020822366.1	2082192	47.24	22.2222	9	29.4118	17	11.1111	9	11.1111	18.3007	ACCEPT
NW_020822366.1	2191532	126.89	16.6667	6	28.5714	7	0	7	16.6667	28.5714	ACCEPT
NW_020822366.1	2207561	998.13	65	20	95	20	60	15	5	35	ACCEPT
NW_020822366.1	2255362	99.26	5.88235	17	20.6897	29	4.16667	24	1.71569	16.523	ACCEPT
NW_020822366.1	2314655	632.79	81.8182	11	92.3077	13	75	8	6.81818	17.3077	ACCEPT
NW_020822366.1	2328193	49.18	5.55556	18	19.0476	21	0	28	5.55556	19.0476	ACCEPT
NW_020822366.1	2517478	106.26	9.52381	21	33.3333	24	6.25	16	3.27381	27.0833	ACCEPT
NW_020822366.1	2721969	45.15	5.55556	18	20	20	0	19	5.55556	20	ACCEPT
NW_020822366.1	2825208	72.41	17.8571	28	35.2941	17	0	7	17.8571	35.2941	ACCEPT
NW_020822366.1	2997012	115.13	17.6471	17	27.7778	18	6.66667	15	10.9804	21.1111	ACCEPT
NW_020822366.1	3007457	33.14	16.6667	18	18.1818	22	0	10	16.6667	18.1818	ACCEPT
NW_020822366.1	3021394	125.55	30	10	41.6667	12	9.09091	11	20.9091	32.5758	ACCEPT
NW_020822366.1	3186530	53.26	16.6667	12	28.5714	21	0	11	16.6667	28.5714	ACCEPT
NW_020822366.1	3273049	132.51	50	12	53.3333	15	0	9	50	53.3333	ACCEPT
NW_020822366.1	3346655	38.23	25	8	33.3333	6	0	6	25	33.3333	ACCEPT
NW_020822366.1	3364858	158.88	11.5385	26	20	35	0	20	11.5385	20	ACCEPT
NW_020822366.1	3369093	32.06	16.6667	12	18.1818	22	7.14286	14	9.52381	11.039	ACCEPT
NW_020822366.1	3422423	84.51	14.2857	28	40	10	8.33333	12	5.95238	31.6667	ACCEPT
NW_020822366.1	3442155	39.06	16.6667	18	23.5294	17	14.2857	7	2.38095	9.2437	ACCEPT
NW_020822366.1	3476246	49.12	4.54545	22	33.3333	15	0	7	4.54545	33.3333	ACCEPT
NW_020822366.1	4082434	42.12	26.6667	15	27.2727	11	0	18	26.6667	27.2727	ACCEPT
NW_020822366.1	4632848	74.53	23.0769	13	33.3333	12	0	9	23.0769	33.3333	ACCEPT
NW_020822366.1	4844606	284.88	25	12	52.9412	17	0	14	25	52.9412	ACCEPT
NW_020822366.1	5119131	219.63	13.3333	15	42.8571	28	0	6	13.3333	42.8571	ACCEPT
NW_020822366.1	5281736	44.29	8.33333	12	21.7391	23	0	13	8.33333	21.7391	ACCEPT
NW_020822366.1	5357854	87.28	11.1111	27	20.8333	24	7.14286	14	3.96825	13.6905	ACCEPT
NW_020822366.1	5410878	63.14	16.6667	18	20	35	5	20	11.6667	15	ACCEPT
NW_020822366.1	5440386	54.15	5.88235	17	19.2308	26	0	13	5.88235	19.2308	ACCEPT
NW_020822366.1	5490708	134.16	28.5714	14	38.8889	18	10	10	18.5714	28.8889	ACCEPT
NW_020822366.1	5584819	88.46	9.09091	22	38.8889	18	0	8	9.09091	38.8889	ACCEPT
NW_020822366.1	5634891	66.14	18.1818	11	26.6667	15	0	9	18.1818	26.6667	ACCEPT
NW_020822366.1	5649033	41.76	11.7647	34	26.087	23	5	20	6.76471	21.087	ACCEPT
NW_020822366.1	5650057	74.06	13.6364	22	26.3158	19	0	23	13.6364	26.3158	ACCEPT
NW_020822366.1	5653043	57.46	15.3846	13	38.4615	13	0	9	15.3846	38.4615	ACCEPT
NW_020822366.1	5662411	116.44	17.8571	28	29.1667	24	0	13	17.8571	29.1667	ACCEPT
NW_020822366.1	5710658	75.56	15	20	30	20	10	10	5	20	ACCEPT
NW_020822366.1	5714639	74.16	13.3333	15	25	12	10	10	3.33333	15	ACCEPT
NW_020822366.1	5849929	112.95	5.26316	19	23.8095	21	0	18	5.26316	23.8095	ACCEPT
NW_020822366.1	6633501	81.09	11.1111	9	27.7778	18	0	17	11.1111	27.7778	ACCEPT
NW_020822370.1	50338	42.14	14.2857	14	16.6667	18	4.7619	21	9.52381	11.9048	ACCEPT
NW_020822370.1	76853	156.09	4.16667	72	14.7727	88	2.94118	68	1.22549	11.8316	ACCEPT
NW_020822370.1	118813	242.87	15.3846	39	36.8421	19	7.89474	38	7.48988	28.9474	ACCEPT
NW_020822370.1	135208	307.12	20.8333	24	22.8571	35	3.84615	26	16.9872	19.011	ACCEPT
NW_020822370.1	147584	351.13	12.5	24	32.3529	34	0	11	12.5	32.3529	ACCEPT
NW_020822370.1	165071	113.95	16.6667	12	26.6667	15	5.55556	18	11.1111	21.1111	ACCEPT
NW_020822370.1	175736	972.12	73.3333	15	95.2381	21	64.2857	14	9.04762	30.9524	ACCEPT
NW_020822370.1	177400	139.12	20.8333	24	32	25	4.7619	21	16.0714	27.2381	ACCEPT
NW_020822370.1	384988	339.67	66.6667	12	90	10	33.3333	9	33.3333	56.6667	ACCEPT
NW_020822370.1	730218	65.34	10	10	35.7143	14	6.66667	15	3.33333	29.0476	ACCEPT
NW_020822370.1	769427	231.15	40	10	46.6667	15	0	8	40	46.6667	ACCEPT
NW_020822370.1	962577	50.19	6.25	16	37.5	8	0	8	6.25	37.5	ACCEPT
NW_020822370.1	1129640	492.16	71.4286	14	84.6154	13	42.8571	7	28.5714	41.7582	ACCEPT
NW_020822370.1	1358286	54.8	16.6667	6	31.25	16	0	7	16.6667	31.25	ACCEPT
NW_020822370.1	1486032	64.26	10	20	26.3158	19	9.09091	11	0.909091	17.2249	ACCEPT
NW_020822370.1	1489596	35.46	14.2857	14	18.75	32	0	10	14.2857	18.75	ACCEPT
NW_020822370.1	1658954	134.15	14.2857	14	27.2727	22	5	20	9.28571	22.2727	ACCEPT
NW_020822370.1	1785201	66.26	11.7647	17	19.2308	26	0	11	11.7647	19.2308	ACCEPT
NW_020822370.1	2189378	163.25	17.6471	17	42.8571	21	6.66667	15	10.9804	36.1905	ACCEPT
NW_020822370.1	2363017	192.17	14.2857	28	25	32	6.66667	30	7.61905	18.3333	ACCEPT
NW_020822370.1	2423020	50.11	5.55556	18	31.25	16	0	8	5.55556	31.25	ACCEPT
NW_020822370.1	2463044	489.5	85.7143	7	100	10	83.3333	6	2.38095	16.6667	ACCEPT
NW_020822370.1	2492672	81.02	28.5714	7	37.5	16	18.1818	11	10.3896	19.3182	ACCEPT
NW_020822370.1	2658357	46.25	11.7647	17	28.5714	21	0	9	11.7647	28.5714	ACCEPT
NW_020822370.1	2926200	120.19	8.33333	12	40	10	6.25	16	2.08333	33.75	ACCEPT
NW_020822370.1	3168295	96.13	17.6471	17	30.7692	13	13.3333	15	4.31373	17.4359	ACCEPT
NW_020822370.1	3401634	170.53	21.4286	14	40	20	10	10	11.4286	30	ACCEPT
NW_020822370.1	3841102	357.13	21.0526	19	52	25	0	9	21.0526	52	ACCEPT
NW_020822370.1	4149072	314.12	41.1765	17	60	10	7.69231	13	33.4842	52.3077	ACCEPT
NW_020822370.1	4459376	39.12	20	15	21.4286	28	0	16	20	21.4286	ACCEPT
NW_020822370.1	4461697	85.81	22.2222	9	33.3333	15	12.5	8	9.72222	20.8333	ACCEPT
NW_020822370.1	4480705	157.88	16.6667	24	25	24	0	8	16.6667	25	ACCEPT
NW_020822370.1	4703612	33.21	12.5	16	26.6667	15	6.25	16	6.25	20.4167	ACCEPT
NW_020822370.1	4757314	70.29	21.7391	23	26.9231	26	8.33333	12	13.4058	18.5897	ACCEPT
NW_020822370.1	5048495	78.14	22.7273	22	23.0769	26	0	16	22.7273	23.0769	ACCEPT
NW_020822370.1	5252250	64.09	11.5385	26	28	25	0	9	11.5385	28	ACCEPT
NW_020822370.1	5271209	115.09	3.22581	31	22.2222	27	0	11	3.22581	22.2222	ACCEPT
NW_020822370.1	5422342	156.16	13.0435	23	45.8333	24	0	9	13.0435	45.8333	ACCEPT
NW_020822370.1	5554182	56.69	10	20	20.5882	34	9.09091	22	0.909091	11.4973	ACCEPT
NW_020822370.1	5599050	127.73	26.6667	30	30	20	0	8	26.6667	30	ACCEPT
NW_020822370.1	5860113	35.75	9.09091	22	27.2727	11	7.14286	14	1.94805	20.1299	ACCEPT
NW_020822370.1	5993305	94.65	11.1111	18	21.0526	38	0	22	11.1111	21.0526	ACCEPT
NW_020822370.1	6206924	970.21	70.5882	17	90.9091	22	66.6667	6	3.92157	24.2424	ACCEPT
NW_020822370.1	6259234	47.27	9.52381	21	26.9231	26	7.69231	13	1.8315	19.2308	ACCEPT
NW_020822370.1	6851423	164	6.25	16	14.2857	28	0	12	6.25	14.2857	ACCEPT
NW_020822370.1	6861651	80.72	33.3333	15	50	10	0	8	33.3333	50	ACCEPT
NW_020822370.1	6893292	62.65	12.5	24	31.5789	19	0	13	12.5	31.5789	ACCEPT
NW_020822370.1	6898654	116	19.0476	21	33.3333	18	7.69231	13	11.3553	25.641	ACCEPT
NW_020822370.1	6993832	61.1	15.3846	13	25	16	10	10	5.38462	15	ACCEPT
NW_020822370.1	7319963	257.1	66.6667	6	85.7143	14	50	10	16.6667	35.7143	ACCEPT
NW_020822370.1	7500779	127.15	5.88235	17	31.8182	22	0	16	5.88235	31.8182	ACCEPT
NW_020822370.1	7632067	35.32	15.3846	13	25	20	0	8	15.3846	25	ACCEPT
NW_020822370.1	7671333	94.81	21.0526	19	40	10	9.09091	11	11.9617	30.9091	ACCEPT
NW_020822370.1	7921913	496.05	60	15	91.6667	12	36.3636	11	23.6364	55.303	ACCEPT
NW_020822370.1	7985738	200.91	16.6667	12	43.75	16	0	8	16.6667	43.75	ACCEPT
NW_020822370.1	8060068	108.73	25	20	31.8182	22	10	20	15	21.8182	ACCEPT
NW_020822370.1	8110802	57.27	14.2857	14	20	15	7.14286	14	7.14286	12.8571	ACCEPT
NW_020822370.1	8116071	52.52	14.2857	14	40	10	7.14286	14	7.14286	32.8571	ACCEPT
NW_020822370.1	8216448	82.53	21.0526	19	33.3333	18	16.6667	12	4.38596	16.6667	ACCEPT
NW_020822370.1	8299849	54.12	16.6667	18	22.2222	27	0	14	16.6667	22.2222	ACCEPT
NW_020822370.1	8330692	40.42	8.33333	12	28.5714	14	0	6	8.33333	28.5714	ACCEPT
NW_020822370.1	8425842	77.33	15.3846	13	27.2727	22	0	6	15.3846	27.2727	ACCEPT
NW_020822370.1	8606562	255.81	29.4118	17	45	20	9.52381	21	19.888	35.4762	ACCEPT
NW_020822370.1	8646914	66.17	21.4286	14	33.3333	6	0	7	21.4286	33.3333	ACCEPT
NW_020822370.1	8699788	100.78	14.2857	7	31.8182	22	10	10	4.28571	21.8182	ACCEPT
NW_020822370.1	8852108	43.1	4.7619	21	21.0526	19	0	20	4.7619	21.0526	ACCEPT
NW_020822370.1	8899801	36.15	17.8571	28	20	20	5.55556	18	12.3016	14.4444	ACCEPT
NW_020822370.1	8943758	105.1	40	10	46.1538	13	12.5	8	27.5	33.6538	ACCEPT
NW_020822370.1	9006748	91.17	19.3548	31	23.5294	17	0	8	19.3548	23.5294	ACCEPT
NW_020822370.1	9143655	73.55	14.2857	14	25.9259	27	5.55556	18	8.73016	20.3704	ACCEPT
NW_020822370.1	9174811	76.32	5.26316	19	17.2414	29	0	6	5.26316	17.2414	ACCEPT
NW_020822370.1	9180103	685.2	70	10	92.8571	14	61.1111	18	8.88889	31.746	ACCEPT
NW_020822370.1	9267847	61.18	9.09091	11	29.4118	17	0	15	9.09091	29.4118	ACCEPT
NW_020822370.1	9375438	218.41	11.1111	27	36.6667	30	9.52381	21	1.5873	27.1429	ACCEPT
NW_020822370.1	9521338	118.13	20	10	33.3333	18	0	14	20	33.3333	ACCEPT
NW_020822370.1	9588675	107.12	28.5714	14	29.4118	17	0	12	28.5714	29.4118	ACCEPT
NW_020822370.1	9961111	420.12	30	30	33.3333	42	4.54545	44	25.4545	28.7879	ACCEPT
NW_020822370.1	10117137	155.17	33.3333	12	35.2941	17	0	7	33.3333	35.2941	ACCEPT
NW_020822370.1	10473842	1379.53	85.7143	14	89.2857	28	84	25	1.71429	5.28571	ACCEPT
NW_020822370.1	10905605	1665.17	91.6667	36	100	24	84.2105	19	7.45614	15.7895	ACCEPT
NW_020822370.1	11412057	1003.12	78.5714	14	100	20	37.5	8	41.0714	62.5	ACCEPT
NW_020822370.1	11694453	97.22	16.6667	12	17.3913	23	0	6	16.6667	17.3913	ACCEPT
NW_020822370.1	11832400	193.05	30	10	43.75	16	7.69231	13	22.3077	36.0577	ACCEPT
NW_020822370.1	12112627	133.13	18.75	16	30.7692	13	0	10	18.75	30.7692	ACCEPT
NW_020822370.1	12474461	32.16	18.1818	11	25	8	8.33333	12	9.84848	16.6667	ACCEPT
NW_020822370.1	12539847	180.97	14.2857	7	50	20	8.69565	23	5.59006	41.3043	ACCEPT
NW_020822370.1	12804572	1052.17	76.4706	17	100	7	61.1111	18	15.3595	38.8889	ACCEPT
NW_020822370.1	12887176	849.12	53.3333	15	92.3077	26	29.4118	17	23.9216	62.8959	ACCEPT
NW_020822370.1	13069980	33.15	14.2857	14	15.3846	26	0	17	14.2857	15.3846	ACCEPT
NW_020822370.1	13369302	38.75	12.5	8	50	8	0	6	12.5	50	ACCEPT
NW_020822370.1	13867066	708.51	71.4286	14	91.6667	12	46.6667	15	24.7619	45	ACCEPT
NW_020822370.1	14016616	885.11	94.4444	18	100	12	42.8571	7	51.5873	57.1429	ACCEPT
NW_020822370.1	14094520	81.31	14.2857	7	42.8571	7	0	6	14.2857	42.8571	ACCEPT
NW_020822370.1	14345984	37.09	4	25	22.7273	22	0	15	4	22.7273	ACCEPT
NW_020822370.1	14670450	60.25	5.88235	17	28.5714	14	0	6	5.88235	28.5714	ACCEPT
NW_020822370.1	14726576	31.26	10	10	15.7895	19	0	7	10	15.7895	ACCEPT
NW_020822370.1	14729723	576.88	33.3333	30	50	16	0	7	33.3333	50	ACCEPT
NW_020822370.1	14762386	1921.22	71.4286	28	91.8919	37	70.8333	24	0.595238	21.0586	ACCEPT
NW_020822370.1	14904142	171.17	27.2727	22	41.6667	12	0	7	27.2727	41.6667	ACCEPT
NW_020822370.1	15060991	36.36	12.5	8	17.6471	17	0	8	12.5	17.6471	ACCEPT
NW_020822370.1	15228507	621.22	52.9412	17	54.5455	11	0	6	52.9412	54.5455	ACCEPT
NW_020822370.1	15428512	1228.87	87.5	24	90.9091	22	54.5455	11	32.9545	36.3636	ACCEPT
NW_020822370.1	15707115	1055.22	66.6667	24	93.75	16	63.1579	19	3.50877	30.5921	ACCEPT
NW_020822370.1	15967307	579.13	66.6667	21	90.9091	11	57.1429	7	9.52381	33.7662	ACCEPT
NW_020822370.1	16105735	2314.09	89.7436	39	97.1429	35	72.2222	18	17.5214	24.9206	ACCEPT
NW_020822370.1	16105971	1767.13	79.1667	24	93.5484	31	72	25	7.16667	21.5484	ACCEPT
NW_020822370.1	16330419	690.12	61.1111	18	100	14	33.3333	9	27.7778	66.6667	ACCEPT
NW_020822370.1	16486048	30.48	12.5	8	18.75	16	0	8	12.5	18.75	ACCEPT
NW_020822370.1	16500417	374.13	23.5294	17	63.6364	22	5	20	18.5294	58.6364	ACCEPT
NW_020822370.1	16591031	884.2	58.8235	17	93.75	16	55	20	3.82353	38.75	ACCEPT
NW_020822370.1	16842786	1359.53	67.5	40	90.4762	21	50	12	17.5	40.4762	ACCEPT
NW_020822370.1	17110814	61.14	14.2857	21	37.5	8	0	9	14.2857	37.5	ACCEPT
NW_020822370.1	17251172	1585.25	66.6667	21	92.8571	28	59.0909	22	7.57576	33.7662	ACCEPT
NW_020822370.1	17464768	473.28	35	20	47.3684	38	8.33333	24	26.6667	39.0351	ACCEPT
NW_020822370.1	17573324	43.22	12.5	8	22.2222	9	0	7	12.5	22.2222	ACCEPT
NW_020822370.1	17577513	113.22	25	20	41.6667	12	0	7	25	41.6667	ACCEPT
NW_020822370.1	17672908	474.15	75	8	100	8	60	10	15	40	ACCEPT
NW_020822370.1	17869000	1295.05	70	20	91.6667	24	54.5455	22	15.4545	37.1212	ACCEPT
NW_020822370.1	17951483	58.13	28.5714	7	30.7692	13	0	10	28.5714	30.7692	ACCEPT
NW_020822370.1	17964785	324.22	33.3333	18	47.619	21	6.25	16	27.0833	41.369	ACCEPT
NW_020822370.1	17966612	92.51	20	10	23.5294	17	7.14286	14	12.8571	16.3866	ACCEPT
NW_020822370.1	18214060	62.62	37.5	8	71.4286	7	14.2857	7	23.2143	57.1429	ACCEPT
NW_020822370.1	18261668	91.14	6.25	16	29.6296	27	0	7	6.25	29.6296	ACCEPT
NW_020822370.1	18411364	989.17	58.8235	17	92.5926	27	37.5	16	21.3235	55.0926	ACCEPT
NW_020822370.1	18428493	126.13	13.3333	15	29.4118	17	0	16	13.3333	29.4118	ACCEPT
NW_020822370.1	18767974	1493.84	95.4545	22	100	25	85.7143	14	9.74026	14.2857	ACCEPT
NW_020822370.1	18772314	745.13	50	12	92.5926	27	27.7778	18	22.2222	64.8148	ACCEPT
NW_020822370.1	19438940	81.66	12.5	8	55.5556	9	0	6	12.5	55.5556	ACCEPT
NW_020822370.1	19464296	36.79	5.88235	17	31.25	16	0	11	5.88235	31.25	ACCEPT
NW_020822370.1	19545463	106.13	10	20	23.3333	30	0	10	10	23.3333	ACCEPT
NW_020822370.1	19683938	253.43	57.1429	7	60	15	0	6	57.1429	60	ACCEPT
NW_020822370.1	19980670	325.15	33.3333	18	50	20	0	8	33.3333	50	ACCEPT
NW_020822370.1	20431651	99.9	16.6667	6	57.1429	7	0	9	16.6667	57.1429	ACCEPT
NW_020822370.1	20537063	1325.15	86.3636	22	93.3333	30	58.3333	12	28.0303	35	ACCEPT
NW_020822370.1	20714602	1437.73	79.1667	24	93.75	16	63.6364	11	15.5303	30.1136	ACCEPT
NW_020822370.1	21248666	64.56	8.69565	23	23.8095	21	0	9	8.69565	23.8095	ACCEPT
NW_020822370.1	21262258	258.88	26.087	23	44.4444	18	18.1818	11	7.90514	26.2626	ACCEPT
NW_020822370.1	21321245	257.13	25	12	71.4286	7	0	9	25	71.4286	ACCEPT
NW_020822370.1	22199766	45.69	11.1111	9	23.8095	21	0	7	11.1111	23.8095	ACCEPT
NW_020822370.1	22227976	658.13	63.6364	11	100	9	37.5	8	26.1364	62.5	ACCEPT
NW_020822370.1	22359883	219.13	33.3333	6	72.7273	11	0	9	33.3333	72.7273	ACCEPT
NW_020822370.1	22376560	591.63	83.3333	6	100	13	66.6667	9	16.6667	33.3333	ACCEPT
NW_020822370.1	22523180	1132.17	73.913	23	94.4444	18	36.3636	11	37.5494	58.0808	ACCEPT
NW_020822370.1	22544048	40.46	9.09091	11	28.5714	7	0	11	9.09091	28.5714	ACCEPT
NW_020822370.1	22895974	984.97	87.5	8	90.9091	22	62.5	16	25	28.4091	ACCEPT
NW_020822370.1	23117611	62.26	20	15	25	20	7.69231	13	12.3077	17.3077	ACCEPT
NW_020822370.1	23161556	34.85	13.6364	22	19.2308	26	0	9	13.6364	19.2308	ACCEPT
NW_020822370.1	23219202	888.12	71.4286	14	100	18	70	10	1.42857	30	ACCEPT
NW_020822370.1	23405100	1057.14	70	20	94.4444	18	66.6667	15	3.33333	27.7778	ACCEPT
NW_020822370.1	23412665	1181.53	52.9412	17	91.6667	24	47.0588	17	5.88235	44.6078	ACCEPT
NW_020822370.1	23745067	495.16	56.25	16	61.1111	18	8.33333	12	47.9167	52.7778	ACCEPT
NW_020822370.1	24051755	997.2	83.3333	12	94.1176	17	68.75	16	14.5833	25.3676	ACCEPT
NW_020822370.1	24656231	1217.12	70.5882	17	96.6667	30	33.3333	9	37.2549	63.3333	ACCEPT
NW_020822370.1	24899733	795.26	71.4286	21	91.6667	12	50	16	21.4286	41.6667	ACCEPT
NW_020822370.1	25128711	849.32	75	16	93.3333	15	58.3333	12	16.6667	35	ACCEPT
NW_020822370.1	25327783	129.39	15.3846	13	71.4286	7	0	6	15.3846	71.4286	ACCEPT
NW_020822370.1	25440072	33.57	5.55556	18	18.75	32	0	24	5.55556	18.75	ACCEPT
NW_020822370.1	25498044	231.91	30	10	91.6667	12	14.2857	7	15.7143	77.381	ACCEPT
NW_020822370.1	25825801	1155.15	75	28	94.4444	18	54.5455	11	20.4545	39.899	ACCEPT
NW_020822370.1	26361098	327.28	21.4286	28	52.6316	19	6.25	16	15.1786	46.3816	ACCEPT
NW_020822370.1	26917592	49.51	8.33333	12	25	24	0	18	8.33333	25	ACCEPT
NW_020822370.1	27327622	847.01	71.4286	21	90.9091	11	57.1429	14	14.2857	33.7662	ACCEPT
NW_020822370.1	27598547	151.17	20	10	41.6667	12	0	7	20	41.6667	ACCEPT
NW_020822370.1	27686641	399.22	20	15	57.1429	28	0	6	20	57.1429	ACCEPT
NW_020822370.1	27992792	56.09	3.7037	27	25	28	0	18	3.7037	25	ACCEPT
NW_020822370.1	28060110	46.18	11.1111	18	28.5714	7	0	7	11.1111	28.5714	ACCEPT
NW_020822370.1	28411173	57.77	11.1111	18	30.7692	13	0	9	11.1111	30.7692	ACCEPT
NW_020822370.1	28561619	54.54	12.5	8	21.0526	19	0	11	12.5	21.0526	ACCEPT
NW_020822370.1	28653901	39.58	6.66667	15	44.4444	9	5	20	1.66667	39.4444	ACCEPT
NW_020822370.1	28778010	55.43	14.2857	7	27.2727	11	0	9	14.2857	27.2727	ACCEPT
NW_020822370.1	28927445	90.81	24	25	30.7692	13	10	10	14	20.7692	ACCEPT
NW_020822370.1	29031340	933.5	89.4737	19	90.9091	11	54.1667	24	35.307	36.7424	ACCEPT
NW_020822370.1	29116483	80.09	14.2857	7	62.5	8	0	10	14.2857	62.5	ACCEPT
NW_020822370.1	29955093	580.37	58.8235	17	61.1111	18	0	7	58.8235	61.1111	ACCEPT
NW_020822370.1	29985084	1199.14	70.5882	17	92.5926	27	61.9048	21	8.68347	30.6878	ACCEPT
NW_020822370.1	30045561	195.18	6.66667	15	37.037	27	0	13	6.66667	37.037	ACCEPT
NW_020822370.1	30110736	87.89	10.3448	29	27.5862	29	0	24	10.3448	27.5862	ACCEPT
NW_020822370.1	30145050	136.14	18.75	16	41.1765	17	0	9	18.75	41.1765	ACCEPT
NW_020822370.1	30147345	55.02	20	10	20.8333	24	10	10	10	10.8333	ACCEPT
NW_020822370.1	30167837	45.55	14.2857	14	36.3636	11	0	6	14.2857	36.3636	ACCEPT
NW_020822370.1	30345608	65.17	22.2222	9	37.5	8	0	7	22.2222	37.5	ACCEPT
NW_020822370.1	30455988	62.22	15.3846	26	19.2308	26	0	7	15.3846	19.2308	ACCEPT
NW_020822370.1	30476293	197.53	21.4286	14	53.3333	15	0	14	21.4286	53.3333	ACCEPT
NW_020822370.1	30879400	126.1	6.89655	29	39.1304	23	5.55556	18	1.341	33.5749	ACCEPT
NW_020822370.1	30880615	824.09	91.6667	12	94.1176	17	87.5	8	4.16667	6.61765	ACCEPT
NW_020822370.1	30907802	56.89	17.8571	28	18.1818	22	13.0435	23	4.81366	5.13834	ACCEPT
NW_020822370.1	31076405	42.2	9.09091	33	29.4118	17	8.69565	23	0.395257	20.7161	ACCEPT
NW_020822370.1	31187505	74.16	14.2857	14	36.3636	11	0	18	14.2857	36.3636	ACCEPT
NW_020822370.1	31448749	314.12	18.1818	33	19.5652	46	4.16667	24	14.0152	15.3986	ACCEPT
NW_020822370.1	31488624	36.09	3.22581	31	12.8205	39	0	19	3.22581	12.8205	ACCEPT
NW_020822370.1	31852931	138.89	14.2857	35	29.1667	24	6.66667	15	7.61905	22.5	ACCEPT
NW_020822370.1	31965832	284.07	75	12	90	10	50	6	25	40	ACCEPT
NW_020822370.1	32225666	239.59	62.5	8	85.7143	7	28.5714	7	33.9286	57.1429	ACCEPT
NW_020822370.1	32235880	51.55	10	20	12.1951	41	6.66667	15	3.33333	5.52846	ACCEPT
NW_020822370.1	32320808	146.95	15.3846	13	19.2308	26	0	10	15.3846	19.2308	ACCEPT
NW_020822370.1	32512444	1375.14	71.4286	28	91.4286	35	63.1579	19	8.27068	28.2707	ACCEPT
NW_020822370.1	32717949	433.12	24.1379	29	44.1176	34	0	28	24.1379	44.1176	ACCEPT
NW_020822370.1	32840896	40.1	5.26316	19	17.9487	39	0	26	5.26316	17.9487	ACCEPT
NW_020822370.1	32883210	87.87	21.7391	23	26.6667	15	8.33333	12	13.4058	18.3333	ACCEPT
NW_020822370.1	33008928	61.42	12.5	8	50	10	0	6	12.5	50	ACCEPT
NW_020822370.1	33068173	128.53	14.2857	35	20	30	8.69565	23	5.59006	11.3043	ACCEPT
NW_020822370.1	33089173	74.44	9.09091	11	26.6667	15	0	14	9.09091	26.6667	ACCEPT
NW_020822370.1	33179107	164.29	20	10	50	18	9.09091	11	10.9091	40.9091	ACCEPT
NW_020822370.1	33201866	75.17	19.0476	21	20	15	0	8	19.0476	20	ACCEPT
NW_020822370.1	33364974	220.87	30	10	46.6667	15	14.2857	7	15.7143	32.381	ACCEPT
NW_020822370.1	33951959	91.89	20	15	26.6667	15	0	6	20	26.6667	ACCEPT
NW_020822370.1	34021442	129.3	9.67742	31	29.6296	27	6.66667	15	3.01075	22.963	ACCEPT
NW_020822370.1	34058145	77.97	18.75	16	41.6667	12	0	7	18.75	41.6667	ACCEPT
NW_020822370.1	34093639	349.88	29.1667	24	31.5789	38	7.14286	14	22.0238	24.4361	ACCEPT
NW_020822370.1	34294544	69.89	16	25	18.5185	27	0	16	16	18.5185	ACCEPT
NW_020822370.1	34353505	1913.09	92.8571	28	93.4783	46	75	20	17.8571	18.4783	ACCEPT
NW_020822370.1	34498325	1123.93	85.7143	14	94.4444	18	83.3333	6	2.38095	11.1111	ACCEPT
NW_020822370.1	35243154	60.87	10.3448	29	25.9259	27	0	10	10.3448	25.9259	ACCEPT
NW_020822370.1	35453497	1652.76	93.3333	15	96.7742	31	87.5	24	5.83333	9.27419	ACCEPT
NW_020822370.1	35965821	2361.12	97.4359	39	100	33	85	20	12.4359	15	ACCEPT
NW_020822370.1	35969356	1456.09	94.7368	19	95.4545	22	77.7778	27	16.9591	17.6768	ACCEPT
NW_020822370.1	36018484	527.36	80	15	88.8889	18	50	12	30	38.8889	ACCEPT
NW_020822370.1	36157632	1409.52	84.6154	26	85.7143	21	83.871	31	0.744417	1.84332	ACCEPT
NW_020822370.1	36303911	256.14	33.3333	15	47.8261	23	5.88235	17	27.451	41.9437	ACCEPT
NW_020822370.1	36394986	1643.19	80.6452	31	89.4737	38	78.2609	23	2.38429	11.2128	ACCEPT
NW_020822370.1	36483705	586.05	71.4286	14	90.9091	11	69.2308	13	2.1978	21.6783	ACCEPT
NW_020822370.1	36504458	650.15	80	10	100	17	66.6667	9	13.3333	33.3333	ACCEPT
NW_020822370.1	36543671	50.15	16.6667	12	21.4286	14	0	8	16.6667	21.4286	ACCEPT
NW_020822370.1	36808398	2271.09	94.1176	34	97.0588	34	82.1429	28	11.9748	14.916	ACCEPT
NW_020822370.1	36888715	1283.12	77.7778	27	93.75	32	71.4286	14	6.34921	22.3214	ACCEPT
NW_020822370.1	36976840	2160.22	90.9091	33	100	33	84.8485	33	6.06061	15.1515	ACCEPT
NW_020822370.1	37149606	1459.99	86.6667	30	100	27	85	20	1.66667	15	ACCEPT
NW_020822370.1	37167850	1486.78	93.75	16	100	14	80	10	13.75	20	ACCEPT
NW_020822370.1	37324610	66.46	9.09091	33	20.6897	29	7.69231	26	1.3986	12.9973	ACCEPT
NW_020822370.1	37602916	1519.14	82.1429	28	87.8788	33	78.2609	23	3.88199	9.61792	ACCEPT
NW_020822370.1	37650507	1744.19	75.7576	33	94.2857	35	75	20	0.757576	19.2857	ACCEPT
NW_020822370.1	37707591	87.09	4.16667	24	17.1429	35	0	23	4.16667	17.1429	ACCEPT
NW_020822370.1	37863638	547.89	75	8	100	8	50	6	25	50	ACCEPT
NW_020822370.1	37878454	1058.13	83.3333	18	92.8571	28	70.5882	17	12.7451	22.2689	ACCEPT
NW_020822370.1	37930038	546.92	90	10	100	8	85.7143	14	4.28571	14.2857	ACCEPT
NW_020822370.1	38078789	68.89	13.7931	29	16.129	31	6.66667	15	7.12644	9.46237	ACCEPT
NW_020822370.1	38104269	45.17	15.7895	19	30.7692	13	7.69231	13	8.09717	23.0769	ACCEPT
NW_020822370.1	38140605	113.32	15	20	27.2727	22	0	6	15	27.2727	ACCEPT
NW_020822370.1	38292157	1759.13	83.7838	37	100	22	83.3333	30	0.45045	16.6667	ACCEPT
NW_020822370.1	38296245	3455.12	84.8485	33	100	53	80.9524	21	3.8961	19.0476	ACCEPT
NW_020822370.1	38326534	94.44	7.69231	26	20.8333	24	5.55556	18	2.13675	15.2778	ACCEPT
NW_020822370.1	38868214	114.15	10.5263	19	36.3636	11	0	8	10.5263	36.3636	ACCEPT
NW_020822370.1	39104099	2199.53	95.6522	23	100	31	89.4737	19	6.17849	10.5263	ACCEPT
NW_020822370.1	39108387	222.9	21.4286	28	26.4706	34	8.33333	12	13.0952	18.1373	ACCEPT
NW_020822370.1	39268625	927.87	92.8571	14	93.75	16	62.5	8	30.3571	31.25	ACCEPT
NW_020822370.1	39321675	966.29	93.3333	15	100	19	83.3333	6	10	16.6667	ACCEPT
NW_020822370.1	39375629	419.14	66.6667	6	91.6667	12	62.5	8	4.16667	29.1667	ACCEPT
NW_020822370.1	39412853	37.19	16.6667	24	27.2727	11	7.14286	14	9.52381	20.1299	ACCEPT
NW_020822370.1	39425722	289.12	17.8571	28	21.1538	52	3.7037	27	14.1534	17.4501	ACCEPT
NW_020822370.1	39516517	41.2	10	30	16.6667	18	0	18	10	16.6667	ACCEPT
NW_020822370.1	39600563	1688.1	90.9091	33	96.4286	28	64.7059	34	26.2032	31.7227	ACCEPT
NW_020822370.1	39636476	113.09	5.40541	37	27.7778	36	0	20	5.40541	27.7778	ACCEPT
NW_020822370.1	39989816	183.13	16.6667	48	25	72	8.82353	34	7.84314	16.1765	ACCEPT
NW_020822370.1	40048761	88.12	15.625	32	17.3913	46	0	41	15.625	17.3913	ACCEPT
NW_020822370.1	40094539	62.93	17.6471	17	17.8571	28	14.2857	28	3.36134	3.57143	ACCEPT
NW_020822370.1	40107141	912.76	86.6667	15	100	17	70	10	16.6667	30	ACCEPT
NW_020822370.1	40343887	50.1	5.88235	17	23.5294	34	0	23	5.88235	23.5294	ACCEPT
NW_020822372.1	351122	111.26	14.2857	21	27.907	43	6.89655	29	7.38916	21.0104	ACCEPT
NW_020822372.1	416322	1105.84	83.3333	24	86.6667	30	61.7647	34	21.5686	24.902	ACCEPT
NW_020822372.1	431127	2245.53	86.4865	37	91.6667	48	80.6452	31	5.84133	11.0215	ACCEPT
NW_020822372.1	487623	71.95	16.6667	24	17.8571	28	5.26316	19	11.4035	12.594	ACCEPT
NW_020822372.1	513180	2941.49	88.7097	62	94.3396	53	84	25	4.70968	10.3396	ACCEPT
NW_020822372.1	662202	430.61	11.1111	63	27.7778	54	7.31707	41	3.79404	20.4607	ACCEPT
NW_020822372.1	706357	1855.36	86.4865	37	96.875	32	79.1667	24	7.31982	17.7083	ACCEPT
NW_020822372.1	741951	1810.13	89.6552	29	97.5	40	81.25	16	8.40517	16.25	ACCEPT
NW_020822372.1	879261	929.59	75	8	90	10	72.7273	11	2.27273	17.2727	ACCEPT
NW_020822372.1	903957	214.13	14.5833	48	18.75	64	7.14286	42	7.44048	11.6071	ACCEPT
NW_020822372.1	914626	2509.09	93.8776	49	100	37	83.3333	24	10.5442	16.6667	ACCEPT
NW_020822372.1	1051233	1045.23	88.8889	18	100	19	68.75	16	20.1389	31.25	ACCEPT
NW_020822372.1	1064141	1218.16	92.8571	14	100	16	72.7273	11	20.1299	27.2727	ACCEPT
NW_020822372.1	1086961	498.07	80	10	85.7143	14	55.5556	9	24.4444	30.1587	ACCEPT
NW_020822372.1	1281820	2817.11	96.5517	29	100	57	85.7143	28	10.8374	14.2857	ACCEPT
NW_020822372.1	1313615	2246.09	89.1892	37	96	50	66.6667	21	22.5225	29.3333	ACCEPT
NW_020822372.1	1914288	635.08	87.5	8	88.8889	9	77.7778	9	9.72222	11.1111	ACCEPT
NW_020822372.1	1916189	32.24	12.1951	41	15.7895	38	5.88235	17	6.31277	9.90712	ACCEPT
NW_020822372.1	1925731	232.19	12.2807	57	31.7073	41	8.57143	35	3.70927	23.1359	ACCEPT
NW_020822372.1	1938922	1596.35	92.3077	26	96.5517	29	84.6154	13	7.69231	11.9363	ACCEPT
NW_020822372.1	1963258	1070.78	89.4737	19	100	15	83.3333	18	6.14035	16.6667	ACCEPT
NW_020822372.1	2384237	137.87	13.6364	22	22.449	49	7.69231	13	5.94406	14.7567	ACCEPT
NW_020822372.1	2585857	1743.91	88.4615	26	93.5484	31	81.8182	22	6.64336	11.7302	ACCEPT
NW_020822372.1	2699483	1672.73	93.3333	15	100	22	75	12	18.3333	25	ACCEPT
NW_020822372.1	2720900	241.13	26.3158	38	26.9231	26	5.26316	19	21.0526	21.6599	ACCEPT
NW_020822372.1	2746659	626.33	77.7778	9	100	8	50	8	27.7778	50	ACCEPT
NW_020822372.1	2766317	1950.13	86.0465	43	94.1176	34	80.9524	21	5.09413	13.1653	ACCEPT
NW_020822372.1	2988595	1245.41	88.2353	17	100	18	75	8	13.2353	25	ACCEPT
NW_020822372.1	3050496	2834.13	91.1765	34	100	52	83.3333	30	7.84314	16.6667	ACCEPT
NW_020822372.1	3086960	42.23	25	8	37.5	8	0	6	25	37.5	ACCEPT
NW_020822372.1	3156703	715.88	57.8947	19	90.625	32	50	16	7.89474	40.625	ACCEPT
NW_020822372.1	3298287	1996.12	84.6154	26	100	38	82.3529	17	2.26244	17.6471	ACCEPT
NW_020822372.1	3473960	1226.73	93.75	16	100	22	83.3333	12	10.4167	16.6667	ACCEPT
NW_020822372.1	4664144	131.28	45.4545	11	60	10	0	7	45.4545	60	ACCEPT
NW_020822372.1	4678903	81.13	4.16667	24	32	25	0	15	4.16667	32	ACCEPT
NW_020822372.1	4786918	823.91	83.3333	12	100	18	63.6364	11	19.697	36.3636	ACCEPT
NW_020822372.1	5021255	497.17	88.8889	9	100	9	66.6667	6	22.2222	33.3333	ACCEPT
NW_020822373.1	168	422.12	26.6667	15	53.8462	26	4	25	22.6667	49.8462	ACCEPT
NW_020822373.1	95479	777.05	68.75	16	90	20	64.7059	17	4.04412	25.2941	ACCEPT
NW_020822373.1	98059	129.1	5	20	41.1765	17	0	12	5	41.1765	ACCEPT
NW_020822373.1	269292	89.83	16.6667	18	43.75	16	9.09091	11	7.57576	34.6591	ACCEPT
NW_020822373.1	696101	51.09	3.7037	27	25	20	0	12	3.7037	25	ACCEPT
NW_020822373.1	827278	244.25	20.6897	29	33.3333	24	6.66667	15	14.023	26.6667	ACCEPT
NW_020822373.1	962107	126.88	21.7391	23	25	16	0	17	21.7391	25	ACCEPT
NW_020822373.1	1146146	799.13	58.8235	17	94.4444	18	50	24	8.82353	44.4444	ACCEPT
NW_020822373.1	1173900	50.15	15	20	20.8333	24	0	12	15	20.8333	ACCEPT
NW_020822373.1	1249743	169.17	28.5714	14	54.5455	11	0	7	28.5714	54.5455	ACCEPT
NW_020822373.1	1384451	649.12	75	16	100	13	60	10	15	40	ACCEPT
NW_020822373.1	1808487	46.57	8.33333	12	23.0769	13	7.69231	13	0.641026	15.3846	ACCEPT
NW_020822373.1	2222550	658.12	63.6364	11	100	15	50	10	13.6364	50	ACCEPT
NW_020822373.1	2362092	596.97	78.5714	14	85.7143	21	38.4615	13	40.1099	47.2527	ACCEPT
NW_020822373.1	2447607	43.58	7.69231	13	31.8182	22	0	24	7.69231	31.8182	ACCEPT
NW_020822373.1	2568881	50.13	26.087	23	37.5	8	0	11	26.087	37.5	ACCEPT
NW_020822373.1	2600369	97.89	21.0526	19	44.4444	9	0	9	21.0526	44.4444	ACCEPT
NW_020822373.1	2616696	415.17	56.25	16	100	7	30.7692	13	25.4808	69.2308	ACCEPT
NW_020822373.1	2750183	54.1	4.7619	21	36.8421	19	0	9	4.7619	36.8421	ACCEPT
NW_020822373.1	2933986	838.15	80	20	89.4737	19	72.7273	11	7.27273	16.7464	ACCEPT
NW_020822373.1	3074605	116.88	21.4286	14	29.4118	17	0	6	21.4286	29.4118	ACCEPT
NW_020822373.1	3274550	91.13	5	20	38.4615	13	0	8	5	38.4615	ACCEPT
NW_020822373.1	3429583	58.07	9.09091	11	25	24	0	20	9.09091	25	ACCEPT
NW_020822373.1	3459261	67.23	21.4286	14	26.087	23	10	10	11.4286	16.087	ACCEPT
NW_020822373.1	3636398	75.37	14.2857	21	22.2222	27	7.69231	13	6.59341	14.5299	ACCEPT
NW_020822373.1	3646314	33.17	13.0435	23	21.0526	19	7.69231	13	5.35117	13.3603	ACCEPT
NW_020822373.1	3646597	61.01	23.5294	17	35.7143	14	16.6667	18	6.86275	19.0476	ACCEPT
NW_020822373.1	3860145	151.62	6.45161	31	40.7407	27	0	14	6.45161	40.7407	ACCEPT
NW_020822373.1	3964084	77.91	19.0476	21	22.2222	9	0	13	19.0476	22.2222	ACCEPT
NW_020822373.1	3983098	588.28	59.0909	22	92.3077	13	58.8235	17	0.26738	33.4842	ACCEPT
NW_020822373.1	4180054	153.05	35.7143	14	57.1429	7	8.33333	12	27.381	48.8095	ACCEPT
NW_020822373.1	4470340	59.13	5.55556	18	28.5714	14	0	20	5.55556	28.5714	ACCEPT
NW_020822373.1	4476179	118.38	22.2222	18	36.3636	22	7.69231	13	14.5299	28.6713	ACCEPT
NW_020822373.1	4518237	73.09	6.97674	43	19.6078	51	2.94118	34	4.03557	16.6667	ACCEPT
NW_020822373.1	4520712	319.12	10.3448	116	12.4031	129	4.58716	109	5.75767	7.81594	ACCEPT
NW_020822374.1	16925	1373.13	88.2353	17	100	15	70	10	18.2353	30	ACCEPT
NW_020822374.1	127630	40.65	13.5135	37	20	35	0	19	13.5135	20	ACCEPT
NW_020822374.1	166157	39.24	11.1111	9	35.2941	17	7.69231	13	3.4188	27.6018	ACCEPT
NW_020822374.1	286081	61.17	14.2857	7	37.5	8	0	7	14.2857	37.5	ACCEPT
NW_020822374.1	328710	104.05	26.6667	15	50	14	10	10	16.6667	40	ACCEPT
NW_020822374.1	398450	74.22	25	24	26.9231	26	9.52381	21	15.4762	17.3993	ACCEPT
NW_020822374.1	1077774	52.19	33.3333	6	57.1429	7	0	7	33.3333	57.1429	ACCEPT
NW_020822374.1	1126269	78.9	15.3846	13	25	24	9.09091	11	6.29371	15.9091	ACCEPT
NW_020822374.1	1302240	36.09	5.40541	37	19.3548	31	0	20	5.40541	19.3548	ACCEPT
NW_020822374.1	1401348	642.87	80	20	91.6667	12	66.6667	9	13.3333	25	ACCEPT
NW_020822374.1	1699979	145.13	20	10	33.3333	15	0	10	20	33.3333	ACCEPT
NW_020822374.1	1917574	672.56	83.3333	6	100	13	81.8182	11	1.51515	18.1818	ACCEPT
NW_020822374.1	1924433	857.24	86.6667	15	91.6667	24	8.33333	12	78.3333	83.3333	ACCEPT
NW_020822374.1	2006743	893.12	78.2609	23	100	14	62.5	16	15.7609	37.5	ACCEPT
NW_020822374.1	2104485	97.18	20	15	30	20	5.88235	17	14.1176	24.1176	ACCEPT
NW_020822374.1	2121959	49.67	7.69231	13	33.3333	12	0	6	7.69231	33.3333	ACCEPT
NW_020822374.1	2137874	87.43	12.5	8	30.7692	13	0	6	12.5	30.7692	ACCEPT
NW_020822374.1	2186270	2269.13	55	20	94.5946	37	50	20	5	44.5946	ACCEPT
NW_020822374.1	2608403	770.25	59.0909	22	93.3333	15	38.8889	18	20.202	54.4444	ACCEPT
NW_020822374.1	2763693	92.15	25	8	30	10	0	8	25	30	ACCEPT
NW_020822374.1	2847650	512.01	47.0588	17	61.1111	18	8.33333	12	38.7255	52.7778	ACCEPT
NW_020822374.1	2947068	49.33	14.2857	7	50	8	0	8	14.2857	50	ACCEPT
NW_020822374.1	3030218	1125.51	66.6667	24	91.3043	23	55.5556	18	11.1111	35.7488	ACCEPT
NW_020822374.1	3937347	189.23	28.5714	14	54.5455	11	0	7	28.5714	54.5455	ACCEPT
NW_020822374.1	4091049	97.52	22.2222	9	50	12	0	9	22.2222	50	ACCEPT
NW_020822374.1	4194770	241.13	28.5714	7	55	20	0	15	28.5714	55	ACCEPT
NW_020822374.1	4384226	52.18	12.5	8	33.3333	6	0	9	12.5	33.3333	ACCEPT
NW_020822375.1	428680	443.19	40	20	46.1538	26	5.88235	17	34.1176	40.2715	ACCEPT
NW_020822375.1	505835	1276.5	90.9091	11	94.7368	19	76.4706	17	14.4385	18.2663	ACCEPT
NW_020822375.1	750370	1197.09	95.2381	21	100	20	60	10	35.2381	40	ACCEPT
NW_020822375.1	1340414	78.11	5	20	28.5714	21	0	12	5	28.5714	ACCEPT
NW_020822375.1	1469239	35.24	11.1111	18	20.8333	24	0	16	11.1111	20.8333	ACCEPT
NW_020822375.1	1545950	242.26	25	28	38.0952	21	9.67742	31	15.3226	28.4178	ACCEPT
NW_020822375.1	3219156	53.17	25	8	50	6	10	10	15	40	ACCEPT
NW_020822375.1	3342948	55.26	23.5294	17	27.2727	11	9.09091	11	14.4385	18.1818	ACCEPT
NW_020822375.1	3846263	569.19	71.4286	14	90	10	50	26	21.4286	40	ACCEPT
NW_020822375.1	4043411	2648.1	96.6667	30	100	38	84.6154	13	12.0513	15.3846	ACCEPT
NW_020822375.1	4121435	329.96	83.3333	6	88.8889	9	50	6	33.3333	38.8889	ACCEPT
NW_020822375.1	4251893	46.89	7.14286	28	31.8182	22	0	15	7.14286	31.8182	ACCEPT
NW_020822375.1	4404980	80.21	15.3846	26	30.4348	23	12.5	16	2.88462	17.9348	ACCEPT
NW_020822375.1	4653281	1023.88	84.6154	13	100	16	63.6364	11	20.979	36.3636	ACCEPT
NW_020822375.1	4710224	551.26	92.3077	13	100	7	75	8	17.3077	25	ACCEPT
NW_020822375.1	4777626	911.16	83.3333	12	100	14	75	12	8.33333	25	ACCEPT
NW_020822375.1	5293125	1116.15	85.1852	27	100	14	80	15	5.18519	20	ACCEPT
NW_020822375.1	5454747	332.53	10.7143	28	32.6531	49	5.88235	34	4.83193	26.7707	ACCEPT
NW_020822375.1	5522381	1479.84	96.5517	29	100	16	86.6667	15	9.88506	13.3333	ACCEPT
NW_020822375.1	5543381	801.5	87.5	16	100	8	83.3333	12	4.16667	16.6667	ACCEPT
NW_020822375.1	5641246	584.41	69.2308	26	84.2105	19	66.6667	9	2.5641	17.5439	ACCEPT
NW_020822375.1	5878112	1101.55	90.625	32	100	14	87.5	8	3.125	12.5	ACCEPT
NW_020822375.1	6310247	952.14	88.8889	9	94.4444	18	77.7778	9	11.1111	16.6667	ACCEPT
NW_020822375.1	6318313	2060.2	85.3659	41	91.6667	36	76.6667	30	8.69919	15	ACCEPT
NW_020822375.1	6370570	2621.62	93.3333	30	94.1176	34	87.5	24	5.83333	6.61765	ACCEPT
NW_020822375.1	7010808	58.97	13.0435	23	17.5	40	9.09091	22	3.95257	8.40909	ACCEPT
NW_020822375.1	7243577	2356.09	95.8333	24	100	42	82.6087	23	13.2246	17.3913	ACCEPT
NW_020822375.1	7629219	101.56	16.6667	24	24	25	10	20	6.66667	14	ACCEPT
NW_020822375.1	7825502	31.09	5.88235	17	17.1429	35	0	18	5.88235	17.1429	ACCEPT
NW_020822375.1	7931750	384.17	30	30	32.1429	28	7.14286	28	22.8571	25	ACCEPT
NW_020822375.1	7992343	2829.56	92.3077	39	100	23	86.9565	23	5.35117	13.0435	ACCEPT
NW_020822375.1	8197880	1027.64	66.6667	27	88	25	50	22	16.6667	38	ACCEPT
NW_020822375.1	8455348	1214.12	71.4286	21	100	27	66.6667	12	4.7619	33.3333	ACCEPT
NW_020822375.1	8597616	1988.78	94.7368	19	96.9697	33	87.8788	33	6.85805	9.09091	ACCEPT
NW_020822375.1	8717175	2412.1	94.2857	35	100	43	83.3333	18	10.9524	16.6667	ACCEPT
NW_020822375.1	8732219	1561.23	87.5	16	100	23	80	20	7.5	20	ACCEPT
NW_020822375.1	9120094	207.51	16.6667	18	41.1765	17	10	20	6.66667	31.1765	ACCEPT
NW_020822375.1	9410249	75.13	16.6667	18	26.3158	19	7.14286	28	9.52381	19.1729	ACCEPT
NW_020822375.1	9429772	89.32	16.6667	6	40	10	0	9	16.6667	40	ACCEPT
NW_020822375.1	9574741	1438.87	79.1667	24	89.4737	38	75	16	4.16667	14.4737	ACCEPT
NW_020822375.1	9689814	1248.5	90	20	96.4286	28	86.6667	15	3.33333	9.7619	ACCEPT
NW_020822375.1	9958609	936.86	71.4286	14	90.9091	11	54.5455	11	16.8831	36.3636	ACCEPT
NW_020822375.1	10254791	134.88	12.5	8	26.6667	15	7.69231	13	4.80769	18.9744	ACCEPT
NW_020822375.1	10339647	730.64	90	10	100	8	86.6667	15	3.33333	13.3333	ACCEPT
NW_020822375.1	10452415	743.72	83.3333	6	100	13	66.6667	9	16.6667	33.3333	ACCEPT
NW_020822375.1	10455197	159.63	11.7647	17	30	30	0	6	11.7647	30	ACCEPT
NW_020822375.1	10905839	743.17	81.25	16	100	7	80	10	1.25	20	ACCEPT
NW_020822375.1	11721430	1129.53	89.4737	19	94.7368	19	87.5	8	1.97368	7.23684	ACCEPT
NW_020822375.1	12367102	666.44	90	10	100	6	88.8889	9	1.11111	11.1111	ACCEPT
NW_020822375.1	12456447	1827.02	90.3226	31	100	29	88.2353	17	2.08729	11.7647	ACCEPT
NW_020822375.1	12463946	1033.19	71.4286	14	92.3077	26	58.8235	17	12.605	33.4842	ACCEPT
NW_020822375.1	12547074	46.13	6.89655	29	15	40	3.0303	33	3.86625	11.9697	ACCEPT
NW_020822375.1	12570486	1665.33	86.3636	22	100	26	81.8182	33	4.54545	18.1818	ACCEPT
NW_020822375.1	12676845	102.09	2.08333	48	29.0323	31	0	15	2.08333	29.0323	ACCEPT
NW_020822375.1	12739997	560.09	87.5	8	92.8571	14	57.1429	7	30.3571	35.7143	ACCEPT
NW_020822375.1	12769234	58.09	8.51064	47	26.087	23	4.16667	24	4.34397	21.9203	ACCEPT
NW_020822375.1	13048320	1399.12	78.125	32	90.3226	31	40.9091	22	37.2159	49.4135	ACCEPT
NW_020822375.1	13053578	1235.09	89.4737	19	90.4762	21	83.3333	18	6.14035	7.14286	ACCEPT
NW_020822375.1	13133275	749.31	91.6667	12	100	13	85.7143	7	5.95238	14.2857	ACCEPT
NW_020822375.1	13230124	1574.82	89.1892	37	93.3333	15	85.7143	21	3.4749	7.61905	ACCEPT
NW_020822375.1	13313294	1051.02	94.4444	18	100	16	84.6154	13	9.82906	15.3846	ACCEPT
NW_020822375.1	13664055	161.53	12.5	8	38.8889	18	6.25	16	6.25	32.6389	ACCEPT
NW_020822375.1	13702252	166.28	18.1818	33	28.5714	35	4.34783	23	13.834	24.2236	ACCEPT
NW_020822375.1	13711476	2364.5	96.6667	30	100	29	90.9091	11	5.75758	9.09091	ACCEPT
NW_020822375.1	13845641	1194.1	95.2381	21	100	18	77.7778	9	17.4603	22.2222	ACCEPT
NW_020822375.1	14163768	1358.66	86.2069	29	96	25	81.25	16	4.9569	14.75	ACCEPT
NW_020822375.1	14283749	1271.56	90	20	100	15	78.9474	19	11.0526	21.0526	ACCEPT
NW_020822375.1	14335208	660.06	90	10	91.6667	12	85.7143	14	4.28571	5.95238	ACCEPT
NW_020822375.1	14612993	970.39	73.6842	19	92.8571	28	46.1538	13	27.5304	46.7033	ACCEPT
NW_020822375.1	14648227	1627.13	95.2381	21	100	23	88.2353	17	7.0028	11.7647	ACCEPT
NW_020822375.1	14926870	2475.84	97.2973	37	100	41	86.6667	15	10.6306	13.3333	ACCEPT
NW_020822375.1	14950320	53.26	9.52381	42	25.7143	35	0	28	9.52381	25.7143	ACCEPT
NW_020822375.1	15143020	1148.13	90	10	96.2963	27	82.3529	17	7.64706	13.9434	ACCEPT
NW_020822375.1	15412631	380.13	36	25	36.8421	38	0	11	36	36.8421	ACCEPT
NW_020822375.1	15429468	160.88	15.7895	19	31.5789	19	6.66667	15	9.12281	24.9123	ACCEPT
NW_020822375.1	15449617	527.56	88.8889	9	100	10	69.2308	13	19.6581	30.7692	ACCEPT
NW_020822375.1	15786652	861.46	85.7143	7	95.8333	24	83.3333	6	2.38095	12.5	ACCEPT
NW_020822375.1	16469538	541.41	90	10	90.9091	11	30	10	60	60.9091	ACCEPT
NW_020822375.1	16893727	1971.1	94.7368	19	100	27	83.3333	36	11.4035	16.6667	ACCEPT
NW_020822375.1	16971550	763.1	84.2105	19	100	12	50	10	34.2105	50	ACCEPT
NW_020822375.1	17139377	1095.6	83.3333	12	96.4286	28	81.25	16	2.08333	15.1786	ACCEPT
NW_020822375.1	17427245	2013.09	96.7742	31	100	15	84.6154	13	12.1588	15.3846	ACCEPT
NW_020822375.1	17705773	239.88	13.6364	22	35	20	0	22	13.6364	35	ACCEPT
NW_020822375.1	17984519	889.43	90	10	100	9	77.7778	9	12.2222	22.2222	ACCEPT
NW_020822375.1	18032653	1325.57	87.5	16	96	25	62.5	8	25	33.5	ACCEPT
NW_020822375.1	18096325	1373.74	92.3077	13	93.1034	29	83.3333	24	8.97436	9.77011	ACCEPT
NW_020822375.1	18659925	1198.15	91.6667	12	100	14	64.2857	14	27.381	35.7143	ACCEPT
NW_020822375.1	18881955	281.49	58.3333	12	77.7778	9	0	7	58.3333	77.7778	ACCEPT
NW_020822375.1	19043601	1532.2	91.6667	24	100	29	70	10	21.6667	30	ACCEPT
NW_020822375.1	19072912	51.61	27.2727	11	28.5714	14	12.5	8	14.7727	16.0714	ACCEPT
NW_020822375.1	19237184	1263.02	90	20	91.6667	24	82.3529	17	7.64706	9.31373	ACCEPT
NW_020822375.1	19362546	251.73	28	25	30.4348	23	8.33333	24	19.6667	22.1014	ACCEPT
NW_020822375.1	19581620	1013.99	90	20	92.3077	13	60	10	30	32.3077	ACCEPT
NW_020822375.1	19714710	1582.15	92	25	92.5926	27	76.1905	21	15.8095	16.4021	ACCEPT
NW_020822375.1	19887103	1209.04	89.4737	19	91.3043	23	86.9565	23	2.51716	4.34783	ACCEPT
NW_020822375.1	19949504	1336.1	85.7143	21	100	28	78.5714	14	7.14286	21.4286	ACCEPT
NW_020822375.1	19996396	890.22	85.7143	14	90.4762	21	76.4706	17	9.2437	14.0056	ACCEPT
NW_020822375.1	20170035	989.16	80	15	95.4545	22	77.7778	9	2.22222	17.6768	ACCEPT
NW_020822375.1	20256449	263.96	57.1429	7	100	6	50	10	7.14286	50	ACCEPT
NW_020822375.1	20312567	817.42	93.3333	15	100	7	92.3077	13	1.02564	7.69231	ACCEPT
NW_020822375.1	20717997	1809.73	90	20	97.4359	39	88	25	2	9.4359	ACCEPT
NW_020822375.1	20804245	34.16	3.7037	27	22.2222	27	0	16	3.7037	22.2222	ACCEPT
NW_020822375.1	21025346	747.12	87.5	16	100	10	75	20	12.5	25	ACCEPT
NW_020822375.1	21104575	2022.49	94.4444	18	100	39	85.1852	27	9.25926	14.8148	ACCEPT
NW_020822375.1	21155739	196.13	25	24	37.931	29	4	25	21	33.931	ACCEPT
NW_020822375.1	21199052	2003.13	94.4444	36	100	30	82.3529	17	12.0915	17.6471	ACCEPT
NW_020822375.1	21205009	885.53	87.5	16	100	18	83.3333	6	4.16667	16.6667	ACCEPT
NW_020822375.1	21299709	643.88	87.5	8	100	13	77.7778	9	9.72222	22.2222	ACCEPT
NW_020822375.1	21736546	508.15	60	10	94.1176	17	22.2222	9	37.7778	71.8954	ACCEPT
NW_020822375.1	21780599	137.9	14.2857	28	21.6216	37	0	10	14.2857	21.6216	ACCEPT
NW_020822375.1	21916084	109.12	14.2857	21	17.6471	34	0	26	14.2857	17.6471	ACCEPT
NW_020822375.1	21925340	943.68	87.5	8	100	17	83.3333	6	4.16667	16.6667	ACCEPT
NW_020822375.1	22047833	2052.19	86.3636	22	96.9697	33	82.5	40	3.86364	14.4697	ACCEPT
NW_020822375.1	22091869	2074.11	88.8889	36	93.3333	45	82.3529	17	6.53595	10.9804	ACCEPT
NW_020822375.1	22111898	79.26	6.66667	30	25.8065	31	0	23	6.66667	25.8065	ACCEPT
NW_020822375.1	22162451	926.73	66.6667	18	90.4762	21	63.1579	19	3.50877	27.3183	ACCEPT
NW_020822375.1	22166467	1524.11	94.1176	17	97.1429	35	78.5714	14	15.5462	18.5714	ACCEPT
NW_020822375.1	22185076	935.15	80.9524	21	95.4545	22	75	12	5.95238	20.4545	ACCEPT
NW_020822375.1	22217232	1019.49	88.4615	26	88.8889	18	69.2308	13	19.2308	19.6581	ACCEPT
NW_020822375.1	22576892	1577.09	96.5517	29	100	12	84	25	12.5517	16	ACCEPT
NW_020822375.1	22623530	1616.09	95.6522	23	100	22	81.8182	22	13.834	18.1818	ACCEPT
NW_020822375.1	22777530	565.74	88.2353	17	88.8889	18	83.3333	6	4.90196	5.55556	ACCEPT
NW_020822375.1	22815346	53.07	8.69565	23	22.7273	22	0	23	8.69565	22.7273	ACCEPT
NW_020822375.1	22824817	97.13	13.6364	22	20.6897	29	3.84615	26	9.79021	16.8435	ACCEPT
NW_020822375.1	22899045	80.53	18.75	16	26.087	23	11.1111	18	7.63889	14.9758	ACCEPT
NW_020822375.1	22916429	140.17	15.3846	26	32.3529	34	5.88235	17	9.50226	26.4706	ACCEPT
NW_020822375.1	23343095	1064.7	88.8889	18	92.5926	27	83.3333	12	5.55556	9.25926	ACCEPT
NW_020822375.1	23660715	1702.08	85.7143	42	86.9565	23	77.7778	27	7.93651	9.17874	ACCEPT
NW_020822375.1	24134217	2040.53	94.2857	35	94.7368	38	84.2105	19	10.0752	10.5263	ACCEPT
NW_020822375.1	24282080	1005.16	80	10	96.1538	26	71.4286	14	8.57143	24.7253	ACCEPT
NW_020822375.1	24391224	241.17	41.6667	12	70	10	0	7	41.6667	70	ACCEPT
NW_020822375.1	24401766	187.81	44.4444	9	100	7	40	10	4.44444	60	ACCEPT
NW_020822375.1	24466055	975.11	88.8889	9	91.3043	23	81.25	16	7.63889	10.0543	ACCEPT
NW_020822375.1	24676978	1690.09	96.1538	26	100	26	81.25	16	14.9038	18.75	ACCEPT
NW_020822375.1	24694666	487.15	31.4286	35	45.1613	31	0	8	31.4286	45.1613	ACCEPT
NW_020822375.1	24815236	72.95	14.2857	28	26.3158	38	4.7619	21	9.52381	21.5539	ACCEPT
NW_020822375.1	24965234	541.57	73.3333	15	82.3529	17	50	6	23.3333	32.3529	ACCEPT
NW_020822375.1	25062132	97.89	14.2857	14	26.3158	19	9.09091	11	5.19481	17.2249	ACCEPT
NW_020822375.1	25159448	1135.25	92.8571	14	94.4444	18	84.2105	19	8.64662	10.2339	ACCEPT
NW_020822375.1	25210793	1639.17	91.1765	34	100	9	85.7143	14	5.46218	14.2857	ACCEPT
NW_020822375.1	25446905	310.17	26.6667	30	34.6154	26	5.88235	17	20.7843	28.733	ACCEPT
NW_020822375.1	25604110	828.08	90.9091	11	94.4444	18	70	10	20.9091	24.4444	ACCEPT
NW_020822375.1	26084128	1386.58	95	20	96.5517	29	83.3333	12	11.6667	13.2184	ACCEPT
NW_020822375.1	26119810	1779.23	86.6667	30	100	32	81.25	16	5.41667	18.75	ACCEPT
NW_020822375.1	26634009	1415.12	70.8333	24	96	25	65.2174	23	5.61594	30.7826	ACCEPT
NW_020822375.1	26772754	38.09	6.89655	29	22.2222	27	0	18	6.89655	22.2222	ACCEPT
NW_020822375.1	26900822	162.73	31.5789	19	35.2941	17	8.33333	12	23.2456	26.9608	ACCEPT
NW_020822375.1	27841208	83.76	13.3333	15	24.2424	33	5.55556	18	7.77778	18.6869	ACCEPT
NW_020822375.1	28130628	387.44	64.2857	14	90.9091	11	50	6	14.2857	40.9091	ACCEPT
NW_020822375.1	28722316	1575.65	92.8571	28	94.1176	17	50	12	42.8571	44.1176	ACCEPT
NW_020822375.1	28829521	45.12	10.7143	28	11.4286	35	0	15	10.7143	11.4286	ACCEPT
NW_020822375.1	29066982	230.53	20.8333	24	29.7297	37	10.5263	19	10.307	19.2034	ACCEPT
NW_020822375.1	29301912	145.73	11.1111	9	70	10	0	6	11.1111	70	ACCEPT
NW_020822375.1	29697830	1741.38	96.7742	31	100	23	86.6667	15	10.1075	13.3333	ACCEPT
NW_020822375.1	30006196	613.18	81.8182	11	100	9	75	12	6.81818	25	ACCEPT
NW_020822375.1	30058927	1878.09	93.9394	33	96.2963	27	76.9231	26	17.0163	19.3732	ACCEPT
NW_020822375.1	30415381	67.14	8.33333	36	12.1212	33	4	25	4.33333	8.12121	ACCEPT
NW_020822375.1	30490697	709.56	76.1905	21	80	10	65	20	11.1905	15	ACCEPT
NW_020822375.1	30552713	32.13	14.7059	34	16.129	31	4	25	10.7059	12.129	ACCEPT
NW_020822375.1	31183346	80.12	17.3913	23	19.0476	42	3.84615	26	13.5452	15.2015	ACCEPT
NW_020822375.1	31252358	59.12	15.3846	26	16.6667	36	0	15	15.3846	16.6667	ACCEPT
NW_020822375.1	31394584	61.09	4	25	25	24	0	17	4	25	ACCEPT
NW_020822375.1	32591363	1184.15	85	20	92.8571	28	76.9231	13	8.07692	15.9341	ACCEPT
NW_020822375.1	32705729	40.15	18.1818	11	33.3333	9	0	12	18.1818	33.3333	ACCEPT
NW_020822375.1	32837787	1767.09	96	25	100	25	82.3529	17	13.6471	17.6471	ACCEPT
NW_020822375.1	32843355	1974.29	90	20	95.9184	49	80	15	10	15.9184	ACCEPT
NW_020822375.1	33354177	109.1	5.26316	19	25.7143	35	0	22	5.26316	25.7143	ACCEPT
NW_020822375.1	33595269	646.95	87.5	8	100	14	85.7143	7	1.78571	14.2857	ACCEPT
NW_020822375.1	33622475	39.15	6.66667	15	37.5	8	0	19	6.66667	37.5	ACCEPT
NW_020822375.1	33626800	1930.1	91.6667	24	100	25	88.2353	34	3.43137	11.7647	ACCEPT
NW_020822375.1	33629169	798.63	85	20	90	20	60	10	25	30	ACCEPT
NW_020822375.1	34064637	53.23	15.3846	13	33.3333	12	0	13	15.3846	33.3333	ACCEPT
NW_020822375.1	35400558	1721.89	90.9091	33	96.1538	26	87.5	16	3.40909	8.65385	ACCEPT
NW_020822375.1	35543088	258.16	64.2857	14	100	8	57.1429	7	7.14286	42.8571	ACCEPT
NW_020822375.1	35681842	54.65	11.5385	26	19.5122	41	2.85714	35	8.68132	16.6551	ACCEPT
NW_020822375.1	35720099	824.13	68.75	16	85.7143	21	66.6667	9	2.08333	19.0476	ACCEPT
NW_020822375.1	35986182	35.53	33.3333	9	35.2941	17	14.2857	7	19.0476	21.0084	ACCEPT
NW_020822375.1	36004986	415.16	63.6364	11	88.8889	9	54.5455	11	9.09091	34.3434	ACCEPT
NW_020822375.1	36079845	636.19	81.8182	11	100	13	70	10	11.8182	30	ACCEPT
NW_020822375.1	36300445	991.36	88	25	92.3077	13	75	12	13	17.3077	ACCEPT
NW_020822375.1	36352734	157.9	14.2857	7	44	25	0	8	14.2857	44	ACCEPT
NW_020822375.1	36402561	573.69	86.6667	15	91.6667	12	56.25	16	30.4167	35.4167	ACCEPT
NW_020822376.1	143104	1015.57	90.9091	22	95.2381	21	83.3333	12	7.57576	11.9048	ACCEPT
NW_020822376.1	214718	1193.78	94.1176	17	100	17	86.6667	15	7.45098	13.3333	ACCEPT
NW_020822376.1	234432	66.16	25	8	26.087	23	0	9	25	26.087	ACCEPT
NW_020822376.1	244103	901.55	88.8889	18	90.9091	22	71.4286	14	17.4603	19.4805	ACCEPT
NW_020822376.1	349473	145.12	9.52381	21	21.9512	41	0	27	9.52381	21.9512	ACCEPT
NW_020822376.1	533216	174	46.6667	15	50	8	12.5	8	34.1667	37.5	ACCEPT
NW_020822376.1	580502	50.37	8.33333	36	17.7778	45	7.69231	13	0.641026	10.0855	ACCEPT
NW_020822376.1	674511	1056.44	91.6667	24	93.3333	15	88.8889	9	2.77778	4.44444	ACCEPT
NW_020822376.1	934057	1166.91	87.5	16	94.1176	17	82.6087	23	4.8913	11.509	ACCEPT
NW_020822376.1	1324056	540.44	91.6667	12	100	8	77.7778	9	13.8889	22.2222	ACCEPT
NW_020822376.1	1410729	1659.14	86.2069	29	100	27	82.3529	17	3.85396	17.6471	ACCEPT
NW_020822376.1	1739182	71.54	9.52381	21	25	16	0	11	9.52381	25	ACCEPT
NW_020822376.1	1742886	103.16	26.6667	15	35.2941	17	11.1111	18	15.5556	24.183	ACCEPT
NW_020822376.1	1743153	73.13	5.88235	17	27.7778	18	0	11	5.88235	27.7778	ACCEPT
NW_020822376.1	1815925	1517.16	85.7143	14	95	20	85	20	0.714286	10	ACCEPT
NW_020822376.1	2130566	908.3	90.9091	11	100	12	83.3333	6	7.57576	16.6667	ACCEPT
NW_020822376.1	2515089	434.13	27.2727	22	47.3684	19	0	9	27.2727	47.3684	ACCEPT
NW_020822376.1	2626717	271.12	35.2941	17	45	20	0	13	35.2941	45	ACCEPT
NW_020822376.1	2782469	784.07	92.3077	13	100	10	83.3333	6	8.97436	16.6667	ACCEPT
NW_020822376.1	2842976	186.81	12.5	16	66.6667	9	10	10	2.5	56.6667	ACCEPT
NW_020822376.1	2957094	31.28	13.0435	23	21.0526	19	8.33333	12	4.71014	12.7193	ACCEPT
NW_020822376.1	2994257	91.89	16.6667	24	23.8095	21	5	20	11.6667	18.8095	ACCEPT
NW_020822376.1	3040335	1253.02	94.4444	18	100	24	83.3333	6	11.1111	16.6667	ACCEPT
NW_020822376.1	3318955	58.8	10.3448	29	21.9512	41	6.66667	15	3.67816	15.2846	ACCEPT
NW_020822376.1	3340750	46.89	10	20	32	25	3.57143	28	6.42857	28.4286	ACCEPT
NW_020822376.1	3343741	959.13	85.7143	14	100	15	70	10	15.7143	30	ACCEPT
NW_020822376.1	3536308	1220.12	72	25	93.9394	33	63.6364	11	8.36364	30.303	ACCEPT
NW_020822376.1	3589163	1476.78	94.4444	18	100	24	87.5	16	6.94444	12.5	ACCEPT
NW_020822376.1	3615304	195.87	33.3333	21	46.6667	15	9.09091	11	24.2424	37.5758	ACCEPT
NW_020822376.1	3933686	74.14	23.0769	13	33.3333	15	5	20	18.0769	28.3333	ACCEPT
NW_020822376.1	4141052	43.33	20	15	40	15	7.69231	13	12.3077	32.3077	ACCEPT
NW_020822376.1	4241452	209.13	23.0769	26	32.2581	31	5.26316	19	17.8138	26.9949	ACCEPT
NW_020822376.1	4301623	340.13	19.2308	26	31.0345	29	4.34783	23	14.8829	26.6867	ACCEPT
NW_020822376.1	4319403	218.89	19.6429	56	21.4286	56	11.1111	27	8.53175	10.3175	ACCEPT
NW_020822377.1	232131	845.36	90	10	93.75	16	66.6667	15	23.3333	27.0833	ACCEPT
NW_020822377.1	1156981	178.23	13.3333	15	30	20	0	6	13.3333	30	ACCEPT
NW_020822377.1	1220815	68.29	15.3846	13	27.2727	22	3.84615	26	11.5385	23.4266	ACCEPT
NW_020822377.1	1239736	151.66	57.1429	7	81.8182	11	42.8571	7	14.2857	38.961	ACCEPT
NW_020822377.1	1429747	673.71	88.2353	17	90	10	70	10	18.2353	20	ACCEPT
NW_020822377.1	1846363	34.23	8	25	23.0769	13	0	15	8	23.0769	ACCEPT
NW_020822377.1	2373356	2021.12	73.1707	41	92.6829	41	69.2308	13	3.93996	23.4522	ACCEPT
NW_020822377.1	2454928	770.56	57.1429	28	90.9091	11	33.3333	18	23.8095	57.5758	ACCEPT
NW_020822377.1	2482980	36.14	11.1111	9	30.7692	13	0	8	11.1111	30.7692	ACCEPT
NW_020822377.1	2647401	930.39	75	12	100	9	60	15	15	40	ACCEPT
NW_020822377.1	2755493	162.09	6.06061	33	37.5	24	0	8	6.06061	37.5	ACCEPT
NW_020822377.1	2780485	40.56	16.6667	24	18.75	16	0	19	16.6667	18.75	ACCEPT
NW_020822377.1	2792460	565.13	23.8095	21	42.4242	33	0	10	23.8095	42.4242	ACCEPT
NW_020822377.1	2847368	958.86	56.5217	23	93.3333	15	12.5	8	44.0217	80.8333	ACCEPT
NW_020822377.1	2908527	34.23	11.1111	18	36.3636	11	0	10	11.1111	36.3636	ACCEPT
NW_020822377.1	3046594	53.09	13.0435	23	27.2727	22	9.09091	22	3.95257	18.1818	ACCEPT
NW_020822377.1	3053292	288.05	61.5385	13	83.3333	6	50	12	11.5385	33.3333	ACCEPT
NW_020822377.1	3069624	970.72	94.1176	17	100	11	85.7143	14	8.40336	14.2857	ACCEPT
NW_020822377.1	3429702	111.51	18.1818	11	36.8421	19	9.09091	11	9.09091	27.7512	ACCEPT
NW_020822377.1	3704947	1746.12	65.2174	23	100	19	60.8696	23	4.34783	39.1304	ACCEPT
NW_020822377.1	3893147	302.22	50	6	100	6	33.3333	6	16.6667	66.6667	ACCEPT
NW_020822377.1	3982116	1444.26	57.8947	19	92.3077	26	57.1429	21	0.75188	35.1648	ACCEPT
NW_020822377.1	4242684	255.17	53.8462	13	54.5455	11	0	7	53.8462	54.5455	ACCEPT
NW_020822377.1	4294834	65.87	10	30	14.2857	21	5.55556	18	4.44444	8.73016	ACCEPT
NW_020822377.1	4301978	119.12	12.5	48	13.3333	30	0	12	12.5	13.3333	ACCEPT
NW_020822377.1	4307740	483.32	16.129	31	34.2857	35	5	20	11.129	29.2857	ACCEPT
NW_020822379.1	49377	281.22	33.3333	15	36.6667	30	0	6	33.3333	36.6667	ACCEPT
NW_020822379.1	164078	100.13	9.52381	21	18.1818	22	0	18	9.52381	18.1818	ACCEPT
NW_020822379.1	372074	32.22	18.1818	11	33.3333	9	9.09091	11	9.09091	24.2424	ACCEPT
NW_020822379.1	492722	55.53	20	10	22.2222	9	7.69231	13	12.3077	14.5299	ACCEPT
NW_020822379.1	571113	56.15	13.3333	15	18.75	16	0	8	13.3333	18.75	ACCEPT
NW_020822379.1	660000	160.13	23.0769	13	30	10	0	10	23.0769	30	ACCEPT
NW_020822379.1	669201	1573.14	85.1852	27	92.8571	28	69.5652	23	15.62	23.2919	ACCEPT
NW_020822379.1	696209	495.13	46.6667	15	53.3333	15	0	9	46.6667	53.3333	ACCEPT
NW_020822379.1	1013703	584.17	60	10	100	7	23.0769	13	36.9231	76.9231	ACCEPT
NW_020822379.1	1101756	64.61	13.3333	15	33.3333	18	0	17	13.3333	33.3333	ACCEPT
NW_020822379.1	1308146	40.5	9.09091	11	12	7	0	7	9.09091	12	ACCEPT
NW_020822379.1	1432220	53.23	33.3333	6	42.8571	7	0	6	33.3333	42.8571	ACCEPT
NW_020822379.1	1553320	965.3	83.3333	12	100	12	71.4286	7	11.9048	28.5714	ACCEPT
NW_020822379.1	1690585	2617.87	93.3333	15	96.875	32	83.3333	18	10	13.5417	ACCEPT
NW_020822379.1	1794471	59.09	4.7619	21	25	24	0	20	4.7619	25	ACCEPT
NW_020822379.1	1932299	155.17	18.1818	11	42.8571	7	0	7	18.1818	42.8571	ACCEPT
NW_020822379.1	2026513	1122.13	80	20	100	9	57.1429	14	22.8571	42.8571	ACCEPT
NW_020822379.1	2128123	203.22	44.4444	9	50	10	0	6	44.4444	50	ACCEPT
NW_020822379.1	2473475	886.16	76.9231	13	94.4444	18	71.4286	7	5.49451	23.0159	ACCEPT
NW_020822379.1	3165602	143.13	15.3846	13	27.2727	11	0	9	15.3846	27.2727	ACCEPT
NW_020822379.1	3420017	124.88	25	20	28.5714	21	7.69231	13	17.3077	20.8791	ACCEPT
NW_020822379.1	3958389	55.15	14.2857	7	23	6	0	10	14.2857	23	ACCEPT
NW_020822379.1	4153817	153.12	25	16	33.3333	12	4.7619	21	20.2381	28.5714	ACCEPT
NW_020822379.1	4162134	430.05	54.5455	11	70	10	0	9	54.5455	70	ACCEPT
NW_020822379.1	4170843	356.15	46.1538	13	46.6667	15	0	8	46.1538	46.6667	ACCEPT
NW_020822379.1	4283914	160.17	20	10	33.3333	12	0	7	20	33.3333	ACCEPT
NW_020822381.1	204824	337.88	46.6667	15	52.9412	17	7.69231	13	38.9744	45.2489	ACCEPT
NW_020822381.1	447309	102.69	10.5263	19	46.1538	13	0	7	10.5263	46.1538	ACCEPT
NW_020822381.1	455391	77.15	18.1818	11	33.3333	15	0	13	18.1818	33.3333	ACCEPT
NW_020822381.1	491013	209.88	20.9302	43	27	43	6.66667	30	14.2636	20.3333	ACCEPT
NW_020822381.1	498723	77.12	11.1111	18	26.9231	26	0	13	11.1111	26.9231	ACCEPT
NW_020822381.1	563930	121.15	18.1818	11	36.3636	22	0	16	18.1818	36.3636	ACCEPT
NW_020822381.1	596770	439.13	25.7143	35	40.5405	37	0	10	25.7143	40.5405	ACCEPT
NW_020822381.1	923400	31.26	10	30	29	29	0	9	10	29	ACCEPT
NW_020822381.1	924767	95.56	17.3913	23	18.9189	37	7.14286	28	10.2484	11.7761	ACCEPT
NW_020822381.1	1009537	1148.73	65.2174	46	86.6667	15	51.8519	27	13.3655	34.8148	ACCEPT
NW_020822381.1	1135248	33.46	13.3333	15	23.5294	17	0	10	13.3333	23.5294	ACCEPT
NW_020822381.1	1332413	154.09	6.25	32	33.3333	27	4.7619	21	1.4881	28.5714	ACCEPT
NW_020822381.1	1349851	138.22	15.6863	51	19.697	66	9.52381	42	6.16246	10.1732	ACCEPT
NW_020822381.1	1396829	47.89	13.4615	52	17.3333	75	5.12821	39	8.33333	12.2051	ACCEPT
NW_020822381.1	1663501	121.12	17.8571	28	34	32	4.16667	24	13.6905	29.8333	ACCEPT
NW_020822381.1	1756239	48.11	5	20	14.7059	34	0	31	5	14.7059	ACCEPT
NW_020822381.1	1799349	48.26	27.2727	22	35	30	8.69565	23	18.5771	26.3043	ACCEPT
NW_020822381.1	1867542	317.84	62.5	16	85.7143	14	41.6667	12	20.8333	44.0476	ACCEPT
NW_020822381.1	2031423	345.62	9.09091	33	36	50	6.66667	15	2.42424	29.3333	ACCEPT
NW_020822381.1	2060106	127.14	25	8	36	17	0	9	25	36	ACCEPT
NW_020822381.1	2303111	559.12	21.1538	52	37	35	0	17	21.1538	37	ACCEPT
NW_020822381.1	2401931	81.76	6.66667	15	22.7273	22	5.88235	17	0.784314	16.8449	ACCEPT
NW_020822381.1	2409319	117.35	13.3333	15	31.5789	19	0	6	13.3333	31.5789	ACCEPT
NW_020822381.1	2828626	113.13	30	10	35.7143	14	0	9	30	35.7143	ACCEPT
NW_020822381.1	2870999	110.88	30.7692	13	39	19	9.09091	11	21.6783	29.9091	ACCEPT
NW_020822381.1	2953709	145.28	31.8182	22	40	16	30	10	1.81818	10	ACCEPT
NW_020822381.1	3220242	118.09	3.77358	53	17.2414	58	2.04082	49	1.73277	15.2006	ACCEPT
NW_020822381.1	3223727	121.41	10.4167	48	24	50	9.09091	44	1.32576	14.9091	ACCEPT
NW_020822381.1	3418624	35.73	33.3333	15	43	17	25	12	8.33333	18	ACCEPT
NW_020822382.1	37625	41.09	2.5	80	11.4286	70	0	43	2.5	11.4286	ACCEPT
NW_020822382.1	41134	67.09	7.57576	66	16.1765	68	6.34921	63	1.22655	9.82726	ACCEPT
NW_020822382.1	92014	310.94	57.1429	7	75	12	0	8	57.1429	75	ACCEPT
NW_020822382.1	274848	2214.12	73.6842	38	94.7368	38	69.4444	36	4.23977	25.2924	ACCEPT
NW_020822382.1	357871	159.51	30	10	41.1765	17	12.5	24	17.5	28.6765	ACCEPT
NW_020822382.1	477559	79.12	4.54545	22	17.6471	34	0	23	4.54545	17.6471	ACCEPT
NW_020822382.1	695885	361.32	27.5862	29	46	28	6.66667	15	20.9195	39.3333	ACCEPT
NW_020822382.1	907424	52.12	27.2727	11	47	17	21.4286	14	5.84416	25.5714	ACCEPT
NW_020822382.1	1144099	118.16	27.2727	22	48	22	11.1111	27	16.1616	36.8889	ACCEPT
NW_020822382.1	1208120	45.48	12.5	16	36.3636	11	0	7	12.5	36.3636	ACCEPT
NW_020822382.1	1208719	31.69	12.5	16	18.5185	27	9.09091	11	3.40909	9.42761	ACCEPT
NW_020822382.1	1289988	79.18	8	25	23.5294	34	0	19	8	23.5294	ACCEPT
NW_020822382.1	1294678	222.82	50	14	88.8889	9	40	10	10	48.8889	ACCEPT
NW_020822382.1	1297728	952.12	62.5	16	92.8571	28	61.9048	21	0.595238	30.9524	ACCEPT
NW_020822382.1	1317944	56.57	21.9512	41	49	26	14.2857	14	7.66551	34.7143	ACCEPT
NW_020822382.1	1423902	69.17	24	25	50	28	12.5	16	11.5	37.5	ACCEPT
NW_020822382.1	1438506	127.16	21.0526	19	27.2727	22	5.55556	18	15.4971	21.7172	ACCEPT
NW_020822382.1	1473024	163.12	19.2308	26	25	40	3.57143	28	15.6593	21.4286	ACCEPT
NW_020822382.1	1515828	63.17	5.88235	17	23.3333	30	0	20	5.88235	23.3333	ACCEPT
NW_020822382.1	1675070	61.16	28.5714	7	40	10	10	10	18.5714	30	ACCEPT
NW_020822382.1	1721642	197.9	22.2222	36	23.4043	47	7.69231	26	14.5299	15.7119	ACCEPT
NW_020822382.1	1991376	37.05	23.0769	13	53	21	18.75	16	4.32692	34.25	ACCEPT
NW_020822382.1	2009819	87.15	7.69231	13	40	10	0	9	7.69231	40	ACCEPT
NW_020822382.1	2135951	250.93	26.087	23	46.1538	13	6.25	16	19.837	39.9038	ACCEPT
NW_020822382.1	2277254	40.5	8.69565	23	22.8571	35	7.14286	14	1.5528	15.7143	ACCEPT
NW_020822382.1	2757460	109.87	40	10	57	12	33.3333	12	6.66667	23.6667	ACCEPT
NW_020822382.1	2984352	116.93	27.2727	11	60	10	14.2857	7	12.987	45.7143	ACCEPT
NW_020822382.1	3087333	71.25	14.2857	7	21.4286	14	0	6	14.2857	21.4286	ACCEPT
NW_020822385.1	122972	235.13	20	20	37.931	29	0	27	20	37.931	ACCEPT
NW_020822385.1	176228	142.12	15.3846	26	22.8571	35	4.34783	23	11.0368	18.5093	ACCEPT
NW_020822385.1	257439	59.24	8.33333	24	16.129	31	4.34783	23	3.98551	11.7812	ACCEPT
NW_020822385.1	496684	57.15	16.6667	12	28.5714	7	0	8	16.6667	28.5714	ACCEPT
NW_020822385.1	544966	133.17	23.5294	17	33.3333	24	0	7	23.5294	33.3333	ACCEPT
NW_020822385.1	586917	610.51	31.25	32	45.8333	48	9.52381	21	21.7262	36.3095	ACCEPT
NW_020822385.1	973642	106.23	20	15	63	8	0	6	20	63	ACCEPT
NW_020822385.1	1146294	80.17	11.1111	18	31.5789	19	0	14	11.1111	31.5789	ACCEPT
NW_020822385.1	1243743	92.13	23.8095	21	64	11	15.3846	13	8.42491	48.6154	ACCEPT
NW_020822385.1	1360750	65.53	4.7619	21	40	15	0	15	4.7619	40	ACCEPT
NW_020822385.1	1548269	60.41	16.6667	12	33.3333	15	7.14286	14	9.52381	26.1905	ACCEPT
NW_020822385.1	1622226	505.12	76.9231	13	92.8571	14	66.6667	12	10.2564	26.1905	ACCEPT
NW_020822385.1	1684843	61.81	19.0476	21	66	30	16.6667	30	2.38095	49.3333	ACCEPT
NW_020822385.1	1935567	51.09	4.34783	23	29.4118	17	0	24	4.34783	29.4118	ACCEPT
NW_020822385.1	1962728	171.91	42.8571	21	67	23	3.7037	27	39.1534	63.2963	ACCEPT
NW_020822385.1	2021104	107.17	18.1818	11	50	10	12.5	8	5.68182	37.5	ACCEPT
NW_020822385.1	2148592	711.27	81.25	16	93.3333	15	68.75	16	12.5	24.5833	ACCEPT
NW_020822385.1	2332320	30.26	16.6667	6	33.3333	6	0	7	16.6667	33.3333	ACCEPT
NW_020822385.1	2487139	506.89	87.5	8	100	9	71.4286	7	16.0714	28.5714	ACCEPT
NW_020822388.1	243328	91.45	10	20	25	20	0	23	10	25	ACCEPT
NW_020822388.1	267172	262.19	20	10	90	10	0	6	20	90	ACCEPT
NW_020822388.1	373996	55.14	5.88235	17	23.8095	21	0	11	5.88235	23.8095	ACCEPT
NW_020822388.1	410042	134.87	17.5	40	17.8571	28	3.7037	27	13.7963	14.1534	ACCEPT
NW_020822388.1	815778	80.89	18.75	16	28.5714	7	0	9	18.75	28.5714	ACCEPT
NW_020822388.1	824799	30.1	9.67742	31	16.6667	42	4.16667	24	5.51075	12.5	ACCEPT
NW_020822388.1	841274	49.16	18.1818	11	28.5714	14	0	10	18.1818	28.5714	ACCEPT
NW_020822388.1	884610	37.44	7.40741	27	23.8095	21	4.7619	21	2.6455	19.0476	ACCEPT
NW_020822388.1	917538	52.33	15.3846	13	74	22	0	6	15.3846	74	ACCEPT
NW_020822388.1	983238	90.53	19.0476	21	29.4118	17	10.5263	19	8.5213	18.8854	ACCEPT
NW_020822388.1	1019798	107.43	9.52381	21	29.4118	34	0	22	9.52381	29.4118	ACCEPT
NW_020822388.1	1169431	290.9	23.0769	13	31.0345	29	0	8	23.0769	31.0345	ACCEPT
NW_020822388.1	1177963	327.64	62.5	8	100	6	54.5455	11	7.95455	45.4545	ACCEPT
NW_020822388.1	1255650	41.14	28.5714	14	76	9	25	8	3.57143	51	ACCEPT
NW_020822388.1	1298850	342.12	22.5806	31	31.5789	38	0	26	22.5806	31.5789	ACCEPT
NW_020822388.1	1338413	147.18	35.2941	17	37.5	24	7.69231	13	27.6018	29.8077	ACCEPT
NW_020822388.1	1352188	103.87	11.7647	17	25.7143	35	6.66667	15	5.09804	19.0476	ACCEPT
NW_020822388.1	1459469	66.19	10.3448	29	22.2222	18	0	18	10.3448	22.2222	ACCEPT
NW_020822388.1	1513609	162.12	12.5	16	25	20	0	28	12.5	25	ACCEPT
NW_020822388.1	1517422	143.87	60	10	78	8	50	8	10	28	ACCEPT
NW_020822388.1	1527762	33.11	15	20	19.2308	26	9.52381	21	5.47619	9.70696	ACCEPT
NW_020822388.1	1544799	270.88	40.9091	22	46.6667	30	10	10	30.9091	36.6667	ACCEPT
NW_020822388.1	1641130	60.28	9.7561	41	16.6667	42	2.94118	34	6.81492	13.7255	ACCEPT
NW_020822388.1	1683892	43.06	8.69565	23	21.4286	28	0	12	8.69565	21.4286	ACCEPT
NW_020822388.1	1717258	90.12	14.2857	35	18.1818	22	0	23	14.2857	18.1818	ACCEPT
NW_020822388.1	1768741	121.12	15.1515	33	81	29	4.54545	22	10.6061	76.4545	ACCEPT
NW_020822388.1	1782251	103.31	6.06061	33	30.7692	26	0	12	6.06061	30.7692	ACCEPT
NW_020822388.1	1924612	746.12	76.4706	17	100	14	66.6667	12	9.80392	33.3333	ACCEPT
NW_020822388.1	2066276	194.88	22.2222	18	30	10	0	6	22.2222	30	ACCEPT
NW_020822390.1	32181	145.01	18.1818	33	83	32	8.57143	35	9.61039	74.4286	ACCEPT
NW_020822390.1	33612	60.09	3.48837	86	10.989	91	0	52	3.48837	10.989	ACCEPT
NW_020822390.1	53874	48.2	16.6667	12	33.3333	12	0	9	16.6667	33.3333	ACCEPT
NW_020822390.1	403671	329.15	14.2857	14	85	15	0	8	14.2857	85	ACCEPT
NW_020822390.1	491476	65.82	15.3846	13	30	20	0	17	15.3846	30	ACCEPT
NW_020822390.1	864318	275.12	20	15	50	18	0	12	20	50	ACCEPT
NW_020822390.1	886248	55.02	14.2857	7	50	6	0	9	14.2857	50	ACCEPT
NW_020822390.1	1068398	39.17	25	12	89	15	12	25	13	77	ACCEPT
NW_020822390.1	1197140	33.51	9.09091	22	21.7391	23	4.7619	21	4.329	16.9772	ACCEPT
NW_020822390.1	1507058	260.13	36.3636	22	90	21	0	11	36.3636	90	ACCEPT
NW_020822390.1	1748196	248.12	16.6667	24	32	25	3.84615	26	12.8205	28.1538	ACCEPT
NW_020822390.1	1750210	97.16	18.1818	11	33.3333	18	0	9	18.1818	33.3333	ACCEPT
NW_020822391.1	111572	1869.09	96.875	32	100	28	80.9524	21	15.9226	19.0476	ACCEPT
NW_020822391.1	623567	50.09	3.57143	28	17.7778	45	0	29	3.57143	17.7778	ACCEPT
NW_020822391.1	789235	1641.22	90.9091	22	93	35	85.7143	14	5.19481	7.28571	ACCEPT
NW_020822391.1	898439	232.14	57.1429	14	60	10	5.88235	17	51.2605	54.1176	ACCEPT
NW_020822391.1	1316531	56.91	21.4286	14	33.3333	12	11.1111	9	10.3175	22.2222	ACCEPT
NW_020822391.1	1436837	34.53	57.1429	7	96	6	14.2857	7	42.8571	81.7143	ACCEPT
NW_020822391.1	1463165	1689.53	95.6522	23	96.4286	28	83.3333	24	12.3188	13.0952	ACCEPT
NW_020822391.1	1530151	1354.3	92.8571	28	100	18	69.2308	13	23.6264	30.7692	ACCEPT
NW_020822393.1	98230	120.15	33.3333	15	40	15	0	8	33.3333	40	ACCEPT
NW_020822393.1	118517	41.17	30	10	97	12	0	9	30	97	ACCEPT
NW_020822393.1	298476	89.29	12.1212	33	34.6154	26	12	25	0.121212	22.6154	ACCEPT
NW_020822393.1	314482	276.13	19.3548	31	25	28	4.54545	22	14.8094	20.4545	ACCEPT
NW_020822393.1	347318	43.69	11.5385	26	22.7273	22	5	20	6.53846	17.7273	ACCEPT
NW_020822393.1	641450	143.16	62.5	8	100	8	28.5714	14	33.9286	71.4286	ACCEPT
NW_020822393.1	663106	99.16	10	10	18.9189	37	0	16	10	18.9189	ACCEPT
NW_020822393.1	791616	636.31	92.3077	13	100	6	76.1905	21	16.1172	23.8095	ACCEPT
NW_020822393.1	823592	95.66	5	20	26.6667	45	0	14	5	26.6667	ACCEPT
NW_020822393.1	960299	528.13	71.4286	21	88.2353	17	40	15	31.4286	48.2353	ACCEPT
NW_020822393.1	973143	84.26	12	25	21.7391	23	7.14286	28	4.85714	14.5963	ACCEPT
NW_020822393.1	1024717	137.26	25.8065	31	27.5862	29	11.1111	18	14.6953	16.4751	ACCEPT
NW_020822393.1	1124542	43.6	20	25	103	23	8.33333	12	11.6667	94.6667	ACCEPT
NW_020822393.1	1275497	208.12	20.8333	24	40.9091	22	0	19	20.8333	40.9091	ACCEPT
NW_020822393.1	1473395	137.14	25	16	41.6667	12	7.69231	13	17.3077	33.9744	ACCEPT
NW_020822394.1	17473	185.12	9.375	32	19.4444	36	0	17	9.375	19.4444	ACCEPT
NW_020822394.1	86204	33.18	9.09091	11	26.6667	15	0	15	9.09091	26.6667	ACCEPT
NW_020822394.1	237034	61.74	6.66667	15	23.5294	17	0	12	6.66667	23.5294	ACCEPT
NW_020822394.1	268517	834.23	100	15	106	30	88.8889	9	11.1111	17.1111	ACCEPT
NW_020822394.1	338063	519.12	29.4118	17	47.5	40	0	13	29.4118	47.5	ACCEPT
NW_020822394.1	409859	54.15	15.7895	19	20.6897	29	0	13	15.7895	20.6897	ACCEPT
NW_020822394.1	418664	44.53	29.4118	17	107	35	6.66667	15	22.7451	100.333	ACCEPT
NW_020822394.1	434090	1976.12	58.8235	34	96.1538	26	47.619	21	11.2045	48.5348	ACCEPT
NW_020822394.1	453122	1198.92	88.8889	18	94.7368	19	62.5	16	26.3889	32.2368	ACCEPT
NW_020822394.1	724681	2727.12	81.25	16	108	34	80	25	1.25	28	ACCEPT
NW_020822394.1	770588	2063.12	69.2308	13	94.8718	39	64.7059	17	4.52489	30.1659	ACCEPT
NW_020822394.1	778416	521.12	78.5714	14	81.8182	11	58.3333	12	20.2381	23.4848	ACCEPT
NW_020822394.1	962665	855.16	70.5882	17	91.6667	12	64.2857	14	6.30252	27.381	ACCEPT
NW_020822394.1	1340911	1284.05	75	20	93.75	16	60	10	15	33.75	ACCEPT
NW_020822395.1	259604	747.69	100	9	111	16	85.7143	7	14.2857	25.2857	ACCEPT
NW_020822395.1	857130	793.24	80	15	94.7368	19	72.7273	11	7.27273	22.0096	ACCEPT
NW_020822395.1	857455	856.12	88.8889	9	112	16	76.9231	13	11.9658	35.0769	ACCEPT
NW_020822395.1	1245332	568.56	80	15	90	10	75	8	5	15	ACCEPT
NW_020822396.1	23303	172.31	43.4783	23	113	18	0	17	43.4783	113	ACCEPT
NW_020822396.1	41739	66.24	11.7647	17	30	20	0	11	11.7647	30	ACCEPT
NW_020822396.1	64084	572.09	88.8889	9	100	10	33.3333	6	55.5556	66.6667	ACCEPT
NW_020822396.1	90932	34.91	10	20	15.3846	26	0	28	10	15.3846	ACCEPT
NW_020822396.1	176386	101.56	25	20	115	18	16.6667	12	8.33333	98.3333	ACCEPT
NW_020822396.1	190889	105.26	15.7895	38	23.0769	26	0	20	15.7895	23.0769	ACCEPT
NW_020822396.1	408786	34.09	3.0303	33	20.6897	29	0	15	3.0303	20.6897	ACCEPT
NW_020822396.1	568852	30.56	9.09091	11	23.5294	17	0	18	9.09091	23.5294	ACCEPT
NW_020822396.1	646279	779.83	91.6667	12	93.3333	15	62.5	8	29.1667	30.8333	ACCEPT
NW_020822396.1	671575	84.13	30.7692	13	119	24	0	15	30.7692	119	ACCEPT
NW_020822396.1	830021	275.14	14.2857	28	32.2581	31	5	20	9.28571	27.2581	ACCEPT
NW_020822396.1	985939	45.26	30	10	120	17	9.09091	11	20.9091	110.909	ACCEPT
NW_020822396.1	1071195	320.13	46.1538	13	55	20	8.33333	12	37.8205	46.6667	ACCEPT
NW_020822396.1	1106959	897.12	8.90302	629	121	645	7.51708	439	1.38594	113.483	ACCEPT
NW_020822396.1	1113745	156.09	8.04598	174	11.8812	202	6.80272	147	1.24326	5.07847	ACCEPT
NW_020822398.1	115679	815.22	53.8462	13	70.8333	24	0	6	53.8462	70.8333	ACCEPT
NW_020822398.1	395223	84.53	33.3333	12	37.5	8	10	10	23.3333	27.5	ACCEPT
NW_020822398.1	624960	136.89	14.2857	7	123	7	0	6	14.2857	123	ACCEPT
NW_020822398.1	818705	110.53	17.6471	17	17.8571	28	8.33333	24	9.31373	9.52381	ACCEPT
NW_020822398.1	1099713	133.73	9.09091	11	38.0952	21	0	12	9.09091	38.0952	ACCEPT
NW_020822398.1	1136931	79.13	6.25	16	30.4348	23	0	9	6.25	30.4348	ACCEPT
NW_020822398.1	1426663	75.44	12.5	16	18.1818	22	5.88235	17	6.61765	12.2995	ACCEPT
NW_020822398.1	1550740	159.9	20	15	50	16	6.66667	15	13.3333	43.3333	ACCEPT
NW_020822398.1	1578036	177.41	40	10	53.3333	15	0	6	40	53.3333	ACCEPT
NW_020822398.1	1592071	61.91	12.5	16	33.3333	15	0	10	12.5	33.3333	ACCEPT
NW_020822398.1	1646433	50.43	12.5	8	50	8	0	7	12.5	50	ACCEPT
NW_020822398.1	2299571	59.13	21.4286	14	29.4118	17	0	14	21.4286	29.4118	ACCEPT
NW_020822398.1	2351375	796.56	61.1111	18	89.4737	19	46.1538	13	14.9573	43.3198	ACCEPT
NW_020822398.1	2646983	688.98	81.8182	11	82.3529	17	72.2222	18	9.59596	10.1307	ACCEPT
NW_020822398.1	2677468	692.86	90.9091	11	130	14	80	15	10.9091	50	ACCEPT
NW_020822398.1	2683794	37.31	12.5	16	23.8095	21	0	17	12.5	23.8095	ACCEPT
NW_020822398.1	2770139	62.26	28.5714	7	40	15	0	8	28.5714	40	ACCEPT
NW_020822398.1	2829260	386.61	29.4118	17	42.1053	38	7.69231	13	21.7195	34.413	ACCEPT
NW_020822398.1	3468543	80.18	18.1818	11	25	28	0	11	18.1818	25	ACCEPT
NW_020822398.1	3501392	38.09	4.54545	22	19.0476	21	0	24	4.54545	19.0476	ACCEPT
NW_020822398.1	3950411	221.37	66.6667	12	134	14	6.66667	15	60	127.333	ACCEPT
NW_020822398.1	4044128	41.84	15.7895	19	20	30	0	19	15.7895	20	ACCEPT
NW_020822398.1	4103784	91.91	46.1538	13	135	10	17.6471	17	28.5068	117.353	ACCEPT
NW_020822398.1	4180941	75.15	14.8148	27	27.7778	18	8.33333	12	6.48148	19.4444	ACCEPT
NW_020822398.1	4267698	127.9	46.6667	15	136	13	9.09091	11	37.5758	126.909	ACCEPT
NW_020822398.1	4391293	453.88	52.6316	19	58.8235	17	6.66667	15	45.9649	52.1569	ACCEPT
NW_020822398.1	4761183	263.15	26.6667	15	44.4444	18	0	8	26.6667	44.4444	ACCEPT
NW_020822398.1	4896459	123.82	6.25	16	17.2414	29	0	6	6.25	17.2414	ACCEPT
NW_020822398.1	4992899	46.15	31.25	16	138	26	6.25	16	25	131.75	ACCEPT
NW_020822398.1	5166531	144.12	26.3158	19	50	14	0	13	26.3158	50	ACCEPT
NW_020822398.1	5457531	59.32	12.5	8	33.3333	18	0	7	12.5	33.3333	ACCEPT
NW_020822398.1	5490744	51.13	5.26316	19	21.7391	23	0	16	5.26316	21.7391	ACCEPT
NW_020822398.1	5524701	88.45	11.7647	17	140	24	0	12	11.7647	140	ACCEPT
NW_020822398.1	6171727	92.17	24	25	142	20	12	25	12	130	ACCEPT
NW_020822398.1	6208359	325.12	20	20	37.931	29	0	12	20	37.931	ACCEPT
NW_020822398.1	6345456	59.13	3.125	32	21.7391	23	0	19	3.125	21.7391	ACCEPT
NW_020822398.1	6736759	69.15	20	10	23.5294	17	0	8	20	23.5294	ACCEPT
NW_020822398.1	6785520	203.15	39.2857	28	144	29	0	8	39.2857	144	ACCEPT
NW_020822398.1	6785816	123.09	3.57143	28	40.9091	22	0	13	3.57143	40.9091	ACCEPT
NW_020822398.1	6872303	67.13	11.1111	27	25	12	0	23	11.1111	25	ACCEPT
NW_020822398.1	7007970	129.61	26.3158	19	29.4118	17	7.69231	13	18.6235	21.7195	ACCEPT
NW_020822398.1	7048656	92.08	11.7647	17	31.8182	22	9.09091	11	2.6738	22.7273	ACCEPT
NW_020822398.1	7116057	71.19	40	15	50	6	7.14286	14	32.8571	42.8571	ACCEPT
NW_020822398.1	7268089	87.14	50	6	57.1429	7	0	12	50	57.1429	ACCEPT
NW_020822398.1	7379084	87.22	28.5714	14	42.8571	7	0	6	28.5714	42.8571	ACCEPT
NW_020822398.1	7718346	1240.49	88.8889	18	100	20	85.7143	14	3.1746	14.2857	ACCEPT
NW_020822398.1	7956582	391.22	23.3333	30	52.381	21	0	17	23.3333	52.381	ACCEPT
NW_020822398.1	8035907	46.13	17.6471	17	20	20	0	16	17.6471	20	ACCEPT
NW_020822398.1	8076394	77.34	22.8571	35	148	19	16	25	6.85714	132	ACCEPT
NW_020822398.1	8516906	134.12	25.8065	31	150	25	20	15	5.80645	130	ACCEPT
NW_020822398.1	8635377	85.78	63.6364	11	151	21	6.25	16	57.3864	144.75	ACCEPT
NW_020822398.1	8844171	199.26	3.84615	26	41.6667	24	0	12	3.84615	41.6667	ACCEPT
NW_020822398.1	8893894	215.17	40	15	53.8462	13	0	7	40	53.8462	ACCEPT
NW_020822398.1	9230264	139.87	41.6667	12	153	11	11.1111	9	30.5556	141.889	ACCEPT
NW_020822398.1	9266851	89.1	9.09091	11	50	14	0	7	9.09091	50	ACCEPT
NW_020822398.1	9296757	89.61	6.25	16	25	20	5.88235	17	0.367647	19.1176	ACCEPT
NW_020822398.1	9420039	1003.12	72.2222	18	100	13	63.6364	11	8.58586	36.3636	ACCEPT
NW_020822398.1	9481721	89.81	28.5714	21	30	10	9.09091	11	19.4805	20.9091	ACCEPT
NW_020822398.1	9867689	431.71	87.5	8	100	8	83.3333	6	4.16667	16.6667	ACCEPT
NW_020822398.1	9935539	1032.54	92.3077	13	100	20	87.5	8	4.80769	12.5	ACCEPT
NW_020822398.1	9991877	37.12	21.4286	14	156	14	0	15	21.4286	156	ACCEPT
NW_020822398.1	10190185	67.93	15.7895	19	27.7778	18	0	12	15.7895	27.7778	ACCEPT
NW_020822398.1	10274899	89.09	5	20	36.8421	19	0	17	5	36.8421	ACCEPT
NW_020822398.1	10369591	60.22	13.0435	23	18.75	16	5.55556	18	7.48792	13.1944	ACCEPT
NW_020822398.1	10450631	66.17	10.5263	19	25	16	5.55556	18	4.97076	19.4444	ACCEPT
NW_020822398.1	10920600	862.86	75	20	80	10	57.1429	7	17.8571	22.8571	ACCEPT
NW_020822398.1	11039585	61.11	17.6471	17	22.2222	18	0	14	17.6471	22.2222	ACCEPT
NW_020822398.1	11240709	123.16	29.1667	24	159	17	15.3846	26	13.7821	143.615	ACCEPT
NW_020822398.1	11661549	66.91	23.5294	17	160	23	10	10	13.5294	150	ACCEPT
NW_020822398.1	11699948	116.14	13.0435	23	42.8571	14	0	15	13.0435	42.8571	ACCEPT
NW_020822398.1	11771587	298.56	42.8571	21	45.8333	24	11.7647	17	31.0924	34.0686	ACCEPT
NW_020822398.1	11939844	424.15	37.5	16	44.4444	27	0	8	37.5	44.4444	ACCEPT
NW_020822398.1	12137563	64.87	8.33333	12	22.7273	22	0	11	8.33333	22.7273	ACCEPT
NW_020822398.1	12146144	537.11	70	10	100	6	62.5	8	7.5	37.5	ACCEPT
NW_020822398.1	12312046	79.12	20	20	27.7778	18	3.7037	27	16.2963	24.0741	ACCEPT
NW_020822398.1	12424018	506.16	66.6667	9	90	10	63.1579	19	3.50877	26.8421	ACCEPT
NW_020822398.1	12491085	197.38	13.3333	15	45.8333	24	8.33333	12	5	37.5	ACCEPT
NW_020822398.1	12516915	47.09	5.71429	35	21.4286	28	0	14	5.71429	21.4286	ACCEPT
NW_020822398.1	12624398	930.34	87.5	16	100	16	83.3333	12	4.16667	16.6667	ACCEPT
NW_020822398.1	12871092	145.73	28.5714	21	33.3333	18	4.7619	21	23.8095	28.5714	ACCEPT
NW_020822398.1	12872206	279.16	63.6364	11	165	21	9.09091	11	54.5455	155.909	ACCEPT
NW_020822398.1	13525580	1423.13	65.2174	23	93.1034	29	62.5	24	2.71739	30.6034	ACCEPT
NW_020822398.1	13567785	307.61	80	10	87.5	8	77.7778	9	2.22222	9.72222	ACCEPT
NW_020822398.1	13956214	544.12	58.8235	17	91.6667	12	37.5	8	21.3235	54.1667	ACCEPT
NW_020822398.1	14100262	230.17	33.3333	27	35.2941	17	0	7	33.3333	35.2941	ACCEPT
NW_020822398.1	14285224	119.2	18.1818	11	32	25	0	9	18.1818	32	ACCEPT
NW_020822398.1	14304019	1074.87	100	9	170	28	92.3077	13	7.69231	77.6923	ACCEPT
NW_020822398.1	14333768	101.17	12.5	16	26.3158	19	0	8	12.5	26.3158	ACCEPT
NW_020822398.1	14557794	326.23	81.8182	11	171	6	55.5556	9	26.2626	115.444	ACCEPT
NW_020822398.1	14696511	479.22	64.7059	17	88.8889	9	63.6364	11	1.06952	25.2525	ACCEPT
NW_020822398.1	14813077	437.14	70	10	100	10	57.1429	7	12.8571	42.8571	ACCEPT
NW_020822398.1	14878744	36.2	18.1818	11	28.5714	14	5.88235	17	12.2995	22.6891	ACCEPT
NW_020822398.1	15033121	76.81	57.1429	7	173	11	21.4286	14	35.7143	151.571	ACCEPT
NW_020822398.1	15124131	35.95	12.5	16	21.4286	14	7.14286	14	5.35714	14.2857	ACCEPT
NW_020822398.1	15357401	80.26	14.2857	21	28	25	0	11	14.2857	28	ACCEPT
NW_020822398.1	15386245	269.81	36.3636	22	174	24	8.33333	12	28.0303	165.667	ACCEPT
NW_020822398.1	15501531	145.64	4.54545	22	23.3333	30	0	20	4.54545	23.3333	ACCEPT
NW_020822398.1	15536090	125.22	50	10	175	11	0	6	50	175	ACCEPT
NW_020822398.1	15538762	80.51	8.69565	23	33.3333	12	0	13	8.69565	33.3333	ACCEPT
NW_020822398.1	15770469	101.22	50	6	176	8	0	6	50	176	ACCEPT
NW_020822398.1	16347678	120.06	30	10	40	10	0	7	30	40	ACCEPT
NW_020822398.1	16362304	57.9	8.33333	24	177	21	7.69231	13	0.641026	169.308	ACCEPT
NW_020822398.1	16501089	36.28	16.6667	12	40	10	0	7	16.6667	40	ACCEPT
NW_020822398.1	16553396	152.37	27.2727	22	178	14	6.25	16	21.0227	171.75	ACCEPT
NW_020822398.1	17223285	73.16	30.7692	13	180	27	10	10	20.7692	170	ACCEPT
NW_020822398.1	17258428	35.14	13.3333	15	15.7895	19	0	10	13.3333	15.7895	ACCEPT
NW_020822398.1	17483998	331.27	42.8571	7	91.6667	12	33.3333	6	9.52381	58.3333	ACCEPT
NW_020822398.1	17514093	35.92	20	20	181	19	0	15	20	181	ACCEPT
NW_020822398.1	17655447	324.01	50	22	182	20	15.3846	13	34.6154	166.615	ACCEPT
NW_020822398.1	17669669	45.92	12	25	20.6897	29	0	25	12	20.6897	ACCEPT
NW_020822398.1	17673630	74.14	19.0476	21	40	15	0	10	19.0476	40	ACCEPT
NW_020822398.1	17681432	83.19	15.3846	13	25	28	5.88235	17	9.50226	19.1176	ACCEPT
NW_020822398.1	17702152	699.13	70	20	82.3529	17	50	6	20	32.3529	ACCEPT
NW_020822398.1	17716247	156.73	38.4615	13	183	22	35.7143	14	2.74725	147.286	ACCEPT
NW_020822398.1	17879641	76.32	20.8333	24	184	15	0	16	20.8333	184	ACCEPT
NW_020822398.1	18031363	64.93	5	20	18.75	32	0	6	5	18.75	ACCEPT
NW_020822398.1	18074926	583.54	72.7273	11	185	17	70	10	2.72727	115	ACCEPT
NW_020822398.1	18390481	42.14	15.7895	19	186	16	0	11	15.7895	186	ACCEPT
NW_020822398.1	18526055	433.14	62.5	8	93.75	16	30	10	32.5	63.75	ACCEPT
NW_020822398.1	18634743	33.18	5.88235	17	17.2414	29	0	26	5.88235	17.2414	ACCEPT
NW_020822398.1	19207006	52.25	7.14286	14	35.7143	14	0	13	7.14286	35.7143	ACCEPT
NW_020822398.1	19296034	63.01	15.7895	19	18.75	16	12	25	3.78947	6.75	ACCEPT
NW_020822398.1	19975005	48.18	25	8	191	8	0	7	25	191	ACCEPT
NW_020822398.1	20029974	108.53	11.1111	9	27.2727	22	0	21	11.1111	27.2727	ACCEPT
NW_020822398.1	20105581	76.25	14.2857	14	27.5862	29	10.5263	19	3.7594	17.0599	ACCEPT
NW_020822398.1	20129788	93.14	6.66667	15	192	20	0	10	6.66667	192	ACCEPT
NW_020822398.1	20146345	74.19	13.6364	22	20.5882	34	4.34783	23	9.28854	16.2404	ACCEPT
NW_020822398.1	20158750	55.15	6.66667	15	22.2222	27	0	17	6.66667	22.2222	ACCEPT
NW_020822398.1	20207868	249.22	40	20	193	15	0	6	40	193	ACCEPT
NW_020822398.1	20547048	36.15	30	10	194	20	18.1818	11	11.8182	175.818	ACCEPT
NW_020822398.1	20814983	52.29	7.14286	14	195	8	0	7	7.14286	195	ACCEPT
NW_020822398.1	20845865	59.14	16.6667	24	40	10	0	9	16.6667	40	ACCEPT
NW_020822398.1	20857375	67.51	18.75	16	196	17	17.6471	17	1.10294	178.353	ACCEPT
NW_020822398.1	20977348	96.91	16.6667	6	36.3636	22	0	21	16.6667	36.3636	ACCEPT
NW_020822398.1	20993842	43.26	16.6667	12	23.8095	21	4.54545	22	12.1212	19.2641	ACCEPT
NW_020822398.1	21017999	106.13	17.6471	17	197	28	0	11	17.6471	197	ACCEPT
NW_020822398.1	21249322	67.67	14.2857	14	31.5789	19	8.33333	12	5.95238	23.2456	ACCEPT
NW_020822398.1	21294206	61.23	8.33333	12	24.1379	29	0	17	8.33333	24.1379	ACCEPT
NW_020822398.1	21299868	157.15	47.0588	17	198	23	0	14	47.0588	198	ACCEPT
NW_020822398.1	21300684	34.53	14.2857	14	24	25	0	23	14.2857	24	ACCEPT
NW_020822398.1	21359776	457.44	50	24	55	20	0	6	50	55	ACCEPT
NW_020822398.1	21617481	168.9	50	8	53.3333	15	14.2857	7	35.7143	39.0476	ACCEPT
NW_020822398.1	21752597	88.16	27.7778	18	201	25	14.2857	14	13.4921	186.714	ACCEPT
NW_020822398.1	21794183	112.17	28.5714	14	35.2941	17	0	7	28.5714	35.2941	ACCEPT
NW_020822398.1	21927161	176.36	13.6364	22	35.4839	31	7.14286	14	6.49351	28.341	ACCEPT
NW_020822398.1	21944018	90.53	30	20	202	16	11.1111	18	18.8889	190.889	ACCEPT
NW_020822398.1	22092214	42.23	8.33333	24	25	20	0	7	8.33333	25	ACCEPT
NW_020822398.1	22104569	33.1	7.69231	13	22.7273	22	0	13	7.69231	22.7273	ACCEPT
NW_020822398.1	22217265	81.36	7.69231	13	35.2941	17	0	15	7.69231	35.2941	ACCEPT
NW_020822398.1	22225902	246.88	22.2222	18	33.3333	27	0	27	22.2222	33.3333	ACCEPT
NW_020822398.1	22264586	96.13	30	20	43.75	16	0	11	30	43.75	ACCEPT
NW_020822398.1	22328740	106.51	11.1111	18	27.2727	22	0	14	11.1111	27.2727	ACCEPT
NW_020822398.1	22371769	1335.1	100	23	205	24	80	15	20	125	ACCEPT
NW_020822398.1	22562493	56.21	16.6667	24	21.7391	23	8.33333	24	8.33333	13.4058	ACCEPT
NW_020822398.1	22576569	66.12	15.3846	26	18.5185	27	0	21	15.3846	18.5185	ACCEPT
NW_020822398.1	22605258	57.09	26.6667	15	206	17	11.1111	9	15.5556	194.889	ACCEPT
NW_020822398.1	22695173	65.39	7.69231	13	25	28	0	7	7.69231	25	ACCEPT
NW_020822398.1	22700074	100.22	27.2727	11	33.3333	12	0	6	27.2727	33.3333	ACCEPT
NW_020822398.1	22852490	106.55	43.75	16	207	14	8.33333	12	35.4167	198.667	ACCEPT
NW_020822398.1	23434326	227.12	33.3333	15	40.9091	22	4.16667	24	29.1667	36.7424	ACCEPT
NW_020822398.1	23527554	80.17	8.33333	12	50	6	0	8	8.33333	50	ACCEPT
NW_020822398.1	23532713	90.23	20	10	57.1429	7	0	6	20	57.1429	ACCEPT
NW_020822398.1	23962427	81.57	8.69565	23	20	20	6.25	16	2.44565	13.75	ACCEPT
NW_020822398.1	24139222	115.15	22.2222	18	211	10	0	8	22.2222	211	ACCEPT
NW_020822398.1	24213812	51.55	10.5263	19	26.6667	15	9.09091	11	1.43541	17.5758	ACCEPT
NW_020822398.1	24216437	360.14	60	15	87.5	8	0	6	60	87.5	ACCEPT
NW_020822398.1	24451743	75.94	27.2727	11	213	9	8.33333	12	18.9394	204.667	ACCEPT
NW_020822398.1	24458484	76.18	6.66667	15	23.0769	26	6.25	16	0.416667	16.8269	ACCEPT
NW_020822398.1	24525714	114.13	16.6667	12	35.7143	14	5	20	11.6667	30.7143	ACCEPT
NW_020822398.1	24637736	154.17	18.1818	11	34.4828	29	0	8	18.1818	34.4828	ACCEPT
NW_020822398.1	24637868	87.02	21.4286	14	21.875	32	0	10	21.4286	21.875	ACCEPT
NW_020822398.1	24678906	64.11	16.6667	6	33.3333	9	0	6	16.6667	33.3333	ACCEPT
NW_020822398.1	24685706	150.89	11.1111	9	43.75	16	0	15	11.1111	43.75	ACCEPT
NW_020822398.1	24743491	70.73	15.3846	13	36.8421	19	0	22	15.3846	36.8421	ACCEPT
NW_020822398.1	24867936	219.88	44.4444	9	53.3333	15	0	6	44.4444	53.3333	ACCEPT
NW_020822398.1	24902051	245.16	30.7692	13	64.7059	17	10	10	20.7692	54.7059	ACCEPT
NW_020822398.1	24903716	431.12	43.75	16	92.8571	14	33.3333	15	10.4167	59.5238	ACCEPT
NW_020822398.1	24926690	357.05	39.4737	38	216	19	8.33333	12	31.1404	207.667	ACCEPT
NW_020822398.1	25124126	186.14	5.88235	17	43.4783	23	0	10	5.88235	43.4783	ACCEPT
NW_020822398.1	25172216	194.89	33.3333	24	217	14	25	8	8.33333	192	ACCEPT
NW_020822398.1	25180172	39.57	12.5	16	25	20	0	10	12.5	25	ACCEPT
NW_020822398.1	25238776	157.9	60	15	218	12	25	20	35	193	ACCEPT
NW_020822398.1	25247365	167.88	27.7778	18	31.5789	19	10	10	17.7778	21.5789	ACCEPT
NW_020822398.1	25277878	354.16	23.8095	21	66.6667	12	7.69231	13	16.1172	58.9744	ACCEPT
NW_020822398.1	25350701	69.3	12	25	30	20	0	17	12	30	ACCEPT
NW_020822398.1	25395952	97.21	38.4615	13	219	16	15.7895	19	22.6721	203.211	ACCEPT
NW_020822398.1	25534452	383.12	42.8571	21	43.4783	23	0	18	42.8571	43.4783	ACCEPT
NW_020822398.1	25573506	165.12	23.6842	38	27.2727	22	0	14	23.6842	27.2727	ACCEPT
NW_020822398.1	25573928	45.43	7.40741	27	21.0526	19	0	19	7.40741	21.0526	ACCEPT
NW_020822398.1	25812071	163.89	21.0526	19	57.1429	14	12.5	8	8.55263	44.6429	ACCEPT
NW_020822398.1	25982790	51.14	9.09091	11	19.3548	31	0	26	9.09091	19.3548	ACCEPT
NW_020822398.1	26078814	148.87	24.1379	29	27.5862	29	12.5	24	11.6379	15.0862	ACCEPT
NW_020822398.1	26224860	80.98	3.7037	27	29.1667	24	0	6	3.7037	29.1667	ACCEPT
NW_020822398.1	26298836	33.53	28.5714	7	224	8	10	10	18.5714	214	ACCEPT
NW_020822398.1	26374983	163.12	11.7647	17	17.1429	35	0	12	11.7647	17.1429	ACCEPT
NW_020822398.1	26398422	37.15	4.34783	23	21.0526	19	0	21	4.34783	21.0526	ACCEPT
NW_020822398.1	26451846	135.12	20.8333	24	225	24	17.6471	17	3.18627	207.353	ACCEPT
NW_020822398.1	26566921	219.12	16.129	31	226	27	0	24	16.129	226	ACCEPT
NW_020822399.1	173888	123.52	15	20	37.037	27	0	8	15	37.037	ACCEPT
NW_020822399.1	256039	1812.07	100	15	227	44	78.7879	33	21.2121	148.212	ACCEPT
NW_020822399.1	321888	488.12	72.7273	11	87.5	16	57.1429	7	15.5844	30.3571	ACCEPT
NW_020822399.1	674536	555.12	17.1053	76	20.6522	92	3.7037	54	13.4016	16.9485	ACCEPT
NW_020822402.1	495803	158.91	17.8571	28	22.2222	18	6.25	16	11.6071	15.9722	ACCEPT
NW_020822403.1	83070	281.09	7.77202	193	12.1951	246	7.51445	173	0.25757	4.68067	ACCEPT
NW_020822403.1	204325	556.32	25.641	39	27.2727	33	5	20	20.641	22.2727	ACCEPT
NW_020822403.1	335724	59.1	7.14286	28	21.2121	33	4.7619	21	2.38095	16.4502	ACCEPT
NW_020822403.1	410478	131.15	15.7895	19	29.6296	27	5.55556	18	10.2339	24.0741	ACCEPT
NW_020822403.1	505241	33.21	17.2414	29	20	15	0	11	17.2414	20	ACCEPT
NW_020822403.1	685650	39.17	14.2857	21	18.5185	27	0	16	14.2857	18.5185	ACCEPT
NW_020822403.1	800364	170.15	4.7619	21	20	35	0	20	4.7619	20	ACCEPT
NW_020822403.1	1429948	1761.56	89.6552	29	96.7742	31	73.6842	19	15.971	23.09	ACCEPT
NW_020822403.1	1537773	330.6	87.5	8	100	8	66.6667	6	20.8333	33.3333	ACCEPT
NW_020822403.1	2386582	592.14	75	8	100	10	71.4286	14	3.57143	28.5714	ACCEPT
NW_020822403.1	2451218	625.48	81.8182	11	92.3077	13	71.4286	14	10.3896	20.8791	ACCEPT
NW_020822403.1	2643918	51.17	33.3333	6	37.5	8	0	7	33.3333	37.5	ACCEPT
NW_020822403.1	2829860	651.19	87.5	8	100	9	80	10	7.5	20	ACCEPT
NW_020822403.1	3053252	474.12	27.2727	33	31.25	32	0	21	27.2727	31.25	ACCEPT
NW_020822403.1	3471685	767.19	75	8	90	10	57.1429	7	17.8571	32.8571	ACCEPT
NW_020822403.1	3900711	372.29	83.3333	6	87.5	8	7	8	76.3333	80.5	ACCEPT
NW_020822403.1	3924031	1312.63	88.8889	18	91.1765	34	84.6154	13	4.2735	6.56109	ACCEPT
NW_020822403.1	4111127	635.98	80.9524	21	100	7	66.6667	18	14.2857	33.3333	ACCEPT
NW_020822403.1	4116549	363.16	45.4545	22	50	6	0	8	45.4545	50	ACCEPT
NW_020822403.1	4207270	1075.91	92.3077	13	96	25	88.8889	9	3.4188	7.11111	ACCEPT
NW_020822403.1	4617024	1668.62	84.2105	19	92.8571	28	78.9474	19	5.26316	13.9098	ACCEPT
NW_020822403.1	4728805	93.12	26.6667	15	29.4118	17	0	12	26.6667	29.4118	ACCEPT
NW_020822403.1	4786935	537.51	24.3902	41	29.2683	41	9	27	15.3902	20.2683	ACCEPT
NW_020822403.1	5319230	1116.16	78.125	32	86.3636	22	64.2857	14	13.8393	22.0779	ACCEPT
NW_020822403.1	5353904	69.2	29.4118	17	50	10	7.69231	13	21.7195	42.3077	ACCEPT
NW_020822403.1	5507345	148.87	15.3846	13	28.5714	14	5.55556	18	9.82906	23.0159	ACCEPT
NW_020822403.1	5785641	2127.19	96.4286	28	100	31	86.9565	23	9.47205	13.0435	ACCEPT
NW_020822403.1	5838715	1589.21	91.3043	23	92.5926	27	82.6087	23	8.69565	9.9839	ACCEPT
NW_020822403.1	5851286	700.77	88.8889	9	90.9091	22	81.8182	11	7.07071	9.09091	ACCEPT
NW_020822403.1	6167574	64.63	9.09091	22	23.3333	30	0	15	9.09091	23.3333	ACCEPT
NW_020822403.1	6275028	37.17	17.2414	29	21.4286	28	0	21	17.2414	21.4286	ACCEPT
NW_020822403.1	6321220	57.22	10.5263	38	17.2414	29	5	20	5.52632	12.2414	ACCEPT
NW_020822403.1	6351581	471.56	42.1053	19	88.2353	17	12	12	30.1053	76.2353	ACCEPT
NW_020822403.1	6531735	359.88	42.8571	14	48.6486	37	11.1111	18	31.746	37.5375	ACCEPT
NW_020822403.1	6610535	2170.13	95.8333	24	100	29	88.5714	35	7.2619	11.4286	ACCEPT
NW_020822403.1	6784310	1383.88	92.3077	13	100	21	83.3333	6	8.97436	16.6667	ACCEPT
NW_020822403.1	6874631	43.07	14.2857	14	16.6667	30	9.52381	21	4.7619	7.14286	ACCEPT
NW_020822403.1	7154446	101.16	40	10	45.4545	11	0	8	40	45.4545	ACCEPT
NW_020822403.1	7164291	46.8	9.09091	22	29.4118	17	8.33333	12	0.757576	21.0784	ACCEPT
NW_020822403.1	7257993	68.49	10	20	27.7778	18	6.66667	15	3.33333	21.1111	ACCEPT
NW_020822403.1	7761803	38.63	8.33333	12	25	20	5.88235	17	2.45098	19.1176	ACCEPT
NW_020822403.1	7784797	109.14	14.2857	7	22.2222	9	0	8	14.2857	22.2222	ACCEPT
NW_020822403.1	8032921	35.09	3.22581	31	22.7273	22	0	19	3.22581	22.7273	ACCEPT
NW_020822403.1	8166512	91.43	14.2857	14	30	20	10	10	4.28571	20	ACCEPT
NW_020822403.1	8326675	230.12	26.9231	26	29.6296	27	3.125	32	23.7981	26.5046	ACCEPT
NW_020822403.1	8327425	161.12	11.5385	26	23.3333	30	0	26	11.5385	23.3333	ACCEPT
NW_020822403.1	8384744	916.1	88	25	100	11	63.6364	11	24.3636	36.3636	ACCEPT
NW_020822403.1	8441988	103.96	25	8	35	20	7.69231	13	17.3077	27.3077	ACCEPT
NW_020822403.1	8515318	281.13	26.8293	41	33.3333	21	5.26316	19	21.5661	28.0702	ACCEPT
NW_020822403.1	8521236	53.2	8.33333	24	20	35	0	20	8.33333	20	ACCEPT
NW_020822403.1	8541451	95.2	17.6471	17	20	30	11.1111	18	6.53595	8.88889	ACCEPT
NW_020822403.1	8568792	63.96	17.6471	17	25	20	0	23	17.6471	25	ACCEPT
NW_020822403.1	8602517	55.28	15	20	33.3333	12	6.66667	15	8.33333	26.6667	ACCEPT
NW_020822403.1	8700696	371.17	26.6667	30	28.2051	39	5.55556	18	21.1111	22.6496	ACCEPT
NW_020822403.1	8711328	139.12	44.4444	9	50	10	11.1111	9	33.3333	38.8889	ACCEPT
NW_020822403.1	8891770	79.56	9.09091	11	22.2222	18	0	10	9.09091	22.2222	ACCEPT
NW_020822403.1	8914196	775.28	64.7059	17	88.2353	17	63.6364	22	1.06952	24.5989	ACCEPT
NW_020822403.1	8922197	185.25	21.0526	19	50	10	18	8	3.05263	32	ACCEPT
NW_020822403.1	8924555	51.52	7.69231	13	18.75	32	0	11	7.69231	18.75	ACCEPT
NW_020822403.1	9048959	186.12	17.6471	17	21.875	32	0	13	17.6471	21.875	ACCEPT
NW_020822403.1	9056995	80.9	5.26316	19	12.5	16	0	7	5.26316	12.5	ACCEPT
NW_020822403.1	9061291	86.22	16.6667	36	19.2308	26	8	25	8.66667	11.2308	ACCEPT
NW_020822403.1	9602457	69.76	15.7895	19	27.2727	22	5.26316	19	10.5263	22.0096	ACCEPT
NW_020822403.1	9658735	131.01	22.2222	18	26.3158	19	9.09091	11	13.1313	17.2249	ACCEPT
NW_020822403.1	9932745	63.21	10	10	22.2222	18	5.55556	18	4.44444	16.6667	ACCEPT
NW_020822403.1	10136925	30.23	11.7647	34	23.8095	21	0	12	11.7647	23.8095	ACCEPT
NW_020822403.1	10140764	75.61	18.1818	11	26.9231	26	8.33333	12	9.84848	18.5897	ACCEPT
NW_020822403.1	10170765	72.48	14.2857	14	41.6667	12	0	6	14.2857	41.6667	ACCEPT
NW_020822403.1	10172383	95.14	12.5	16	24.1379	29	0	10	12.5	24.1379	ACCEPT
NW_020822403.1	10339032	37.56	18.1818	11	22.2222	18	0	13	18.1818	22.2222	ACCEPT
NW_020822403.1	10351648	96.81	18.1818	22	22.7273	22	8.33333	24	9.84848	14.3939	ACCEPT
NW_020822403.1	10371571	332.51	34.7826	23	36.6667	30	9.09091	22	25.6917	27.5758	ACCEPT
NW_020822403.1	10495321	217.81	20	20	55.5556	18	10	10	10	45.5556	ACCEPT
NW_020822403.1	10522894	129.17	21.0526	19	31.5789	19	0	7	21.0526	31.5789	ACCEPT
NW_020822403.1	11018979	141.89	16.6667	6	50	12	0	8	16.6667	50	ACCEPT
NW_020822403.1	11047827	98.71	25	16	28	25	13.3333	15	11.6667	14.6667	ACCEPT
NW_020822403.1	11158193	49.09	3.84615	26	25.8065	31	0	23	3.84615	25.8065	ACCEPT
NW_020822403.1	11561615	179.43	15.7895	19	37.5	24	6.66667	15	9.12281	30.8333	ACCEPT
NW_020822403.1	11614338	34.81	12.5	16	16.129	31	0	13	12.5	16.129	ACCEPT
NW_020822403.1	12292975	149.12	15.7895	19	24	25	0	24	15.7895	24	ACCEPT
NW_020822403.1	12660219	96.61	12.5	8	38.4615	13	0	12	12.5	38.4615	ACCEPT
NW_020822403.1	12771957	415.13	55.5556	9	90.9091	11	50	10	5.55556	40.9091	ACCEPT
NW_020822403.1	13300395	301.12	31.4286	35	40	25	6.66667	30	24.7619	33.3333	ACCEPT
NW_020822403.1	13728360	54.12	20	15	21.4286	28	10	20	10	11.4286	ACCEPT
NW_020822403.1	14041842	482.63	60	15	75	12	33.3333	6	26.6667	41.6667	ACCEPT
NW_020822403.1	14495811	72.77	17.3913	23	22.5806	31	9.52381	21	7.86749	13.0568	ACCEPT
NW_020822403.1	14594821	336.87	36.3636	22	47.0588	17	7.14286	14	29.2208	39.916	ACCEPT
NW_020822403.1	14849755	1049.09	85.7143	7	95	20	75	12	10.7143	20	ACCEPT
NW_020822403.1	14873738	107.16	16.6667	24	28.5714	21	8.33333	12	8.33333	20.2381	ACCEPT
NW_020822403.1	14923163	74.12	12.5	16	22.2222	27	7.69231	13	4.80769	14.5299	ACCEPT
NW_020822403.1	15116080	200.94	20.8333	24	31.1111	45	3.7037	27	17.1296	27.4074	ACCEPT
NW_020822403.1	15236142	114.37	13.7931	29	24	25	11.7647	17	2.0284	12.2353	ACCEPT
NW_020822403.1	15468624	52.16	16.6667	18	21.4286	28	0	18	16.6667	21.4286	ACCEPT
NW_020822403.1	15481196	33.12	5.88235	17	31.25	16	0	8	5.88235	31.25	ACCEPT
NW_020822403.1	15489901	407.01	66.6667	9	90	10	50	10	16.6667	40	ACCEPT
NW_020822403.1	15852388	136.13	17.3913	23	23.8095	21	4.7619	21	12.6294	19.0476	ACCEPT
NW_020822403.1	15880203	33.05	14.2857	14	18.1818	11	6.66667	15	7.61905	11.5152	ACCEPT
NW_020822403.1	15922165	106.01	26.6667	15	42.8571	14	11.7647	17	14.902	31.0924	ACCEPT
NW_020822403.1	15933029	101.12	25	8	46.1538	13	0	13	25	46.1538	ACCEPT
NW_020822403.1	16383581	53.31	14.2857	7	31.25	16	0	13	14.2857	31.25	ACCEPT
NW_020822403.1	16664062	71.73	19.0476	21	25	16	0	7	19.0476	25	ACCEPT
NW_020822403.1	16669896	83.17	6.66667	15	30.4348	23	0	9	6.66667	30.4348	ACCEPT
NW_020822403.1	16809725	100.15	14.2857	28	25	32	2.94118	34	11.3445	22.0588	ACCEPT
NW_020822403.1	17075263	51.29	11.5385	26	20	25	0	12	11.5385	20	ACCEPT
NW_020822403.1	17197006	133.13	33.3333	12	41.6667	12	0	9	33.3333	41.6667	ACCEPT
NW_020822403.1	17304675	72.12	16	25	18.5185	27	0	13	16	18.5185	ACCEPT
NW_020822403.1	17569270	93.13	7.40741	27	25	32	0	17	7.40741	25	ACCEPT
NW_020822403.1	17751133	191.12	30.7692	26	34.7826	23	5	20	25.7692	29.7826	ACCEPT
NW_020822403.1	18011975	216.16	35	20	36	25	4	25	31	32	ACCEPT
NW_020822403.1	18082304	30.57	16.6667	24	18.1818	22	10.3448	29	6.32184	7.83699	ACCEPT
NW_020822403.1	18120954	53.18	26.6667	15	28.5714	7	0	11	26.6667	28.5714	ACCEPT
NW_020822403.1	18255971	58.17	13.3333	15	25	16	0	12	13.3333	25	ACCEPT
NW_020822403.1	18636391	47.45	12.5	24	22.2222	27	0	22	12.5	22.2222	ACCEPT
NW_020822403.1	18677859	177.15	18.75	32	50	18	7.14286	28	11.6071	42.8571	ACCEPT
NW_020822403.1	18719925	109.13	19.0476	21	23.5294	17	5	20	14.0476	18.5294	ACCEPT
NW_020822403.1	18730204	44.3	19.0476	21	20.8333	24	6.66667	15	12.381	14.1667	ACCEPT
NW_020822403.1	18790959	1332.28	84.2105	19	94.1176	17	80	10	4.21053	14.1176	ACCEPT
NW_020822403.1	18791106	138.53	44.4444	9	75	12	11.1111	9	33.3333	63.8889	ACCEPT
NW_020822403.1	18808149	153.23	14.2857	14	30	30	0	16	14.2857	30	ACCEPT
NW_020822403.1	18920931	578.05	75	16	84.6154	13	69.2308	13	5.76923	15.3846	ACCEPT
NW_020822403.1	19075833	137.37	22.2222	18	26.6667	30	7.14286	14	15.0794	19.5238	ACCEPT
NW_020822403.1	19087544	36.1	4.7619	21	18.1818	22	0	18	4.7619	18.1818	ACCEPT
NW_020822403.1	19190149	185.61	13.0435	23	25.7143	35	6.66667	15	6.37681	19.0476	ACCEPT
NW_020822403.1	19337467	697.33	88.8889	18	92.5926	27	83.3333	6	5.55556	9.25926	ACCEPT
NW_020822403.1	19352029	106.23	10.8108	37	30.7692	13	5	20	5.81081	25.7692	ACCEPT
NW_020822403.1	19387296	182.12	28.5714	14	50	16	4.7619	21	23.8095	45.2381	ACCEPT
NW_020822403.1	19463267	102.13	5.55556	36	18.9189	37	0	29	5.55556	18.9189	ACCEPT
NW_020822403.1	19493563	160.88	20.4545	44	23.8095	21	13.0435	23	7.41107	10.766	ACCEPT
NW_020822403.1	19534214	137.78	11.7647	17	32.3529	34	2.5641	39	9.2006	29.7888	ACCEPT
NW_020822403.1	19565872	274.45	81.8182	11	87.5	8	71.4286	7	10.3896	16.0714	ACCEPT
NW_020822403.1	19581831	54.09	4.16667	24	21.0526	19	0	15	4.16667	21.0526	ACCEPT
NW_020822403.1	19581907	69.56	6.25	16	36.3636	11	0	9	6.25	36.3636	ACCEPT
NW_020822403.1	19966947	70.95	18.5185	27	19.0476	21	9.09091	11	9.42761	9.95671	ACCEPT
NW_020822403.1	20144240	294.89	27.7778	18	37.931	29	4.34783	23	23.43	33.5832	ACCEPT
NW_020822403.1	20284305	632.85	73.3333	15	100	13	46	7	27.3333	54	ACCEPT
NW_020822403.1	20288507	41.8	9.09091	11	29.4118	17	0	6	9.09091	29.4118	ACCEPT
NW_020822403.1	20323897	1159.16	92.8571	14	93.3333	30	72.2222	18	20.6349	21.1111	ACCEPT
NW_020822403.1	20465138	53.9	17.6471	17	23.5294	17	0	10	17.6471	23.5294	ACCEPT
NW_020822403.1	20680874	46.04	15	20	19.2308	26	10	10	5	9.23077	ACCEPT
NW_020822403.1	20878722	60.9	15.3846	13	44.4444	9	9.09091	11	6.29371	35.3535	ACCEPT
NW_020822403.1	20885606	325.16	35.7143	28	42.8571	21	10	10	25.7143	32.8571	ACCEPT
NW_020822403.1	21137999	60.12	12	25	14.2857	28	0	19	12	14.2857	ACCEPT
NW_020822403.1	21146776	286.88	33.3333	18	38.0952	21	7.69231	13	25.641	30.4029	ACCEPT
NW_020822403.1	21372052	203.23	35.7143	14	77.7778	9	0	6	35.7143	77.7778	ACCEPT
NW_020822403.1	21419305	36.75	20	15	31.25	16	8.33333	12	11.6667	22.9167	ACCEPT
NW_020822403.1	21488163	103.89	25	8	33.3333	9	0	7	25	33.3333	ACCEPT
NW_020822403.1	21543652	271.13	37.5	16	83.3333	6	11.1111	9	26.3889	72.2222	ACCEPT
NW_020822403.1	21654127	42.16	15.3846	13	16.6667	24	5.26316	19	10.1215	11.4035	ACCEPT
NW_020822403.1	21974984	98.17	18.1818	11	25	32	0	13	18.1818	25	ACCEPT
NW_020822403.1	22004519	46.14	22.2222	9	37.5	8	0	9	22.2222	37.5	ACCEPT
NW_020822403.1	22024171	49.26	22.2222	9	25	16	6.66667	15	15.5556	18.3333	ACCEPT
NW_020822403.1	22188356	350.27	38.4615	13	47.619	21	0	11	38.4615	47.619	ACCEPT
NW_020822403.1	22317239	79.12	11.9048	42	14.6341	41	0	25	11.9048	14.6341	ACCEPT
NW_020822403.1	22383525	175.12	17.2414	29	21.4286	28	0	23	17.2414	21.4286	ACCEPT
NW_020822403.1	22410919	81.11	14.2857	7	28.5714	14	0	14	14.2857	28.5714	ACCEPT
NW_020822403.1	22491916	333.88	27.7778	18	28.8889	45	6.66667	15	21.1111	22.2222	ACCEPT
NW_020822403.1	22549483	213.41	6.25	16	50	24	0	20	6.25	50	ACCEPT
NW_020822403.1	22843036	72.6	7.69231	26	17.1429	35	6.25	16	1.44231	10.8929	ACCEPT
NW_020822403.1	23117851	372.05	28.125	32	37.1429	35	8.33333	24	19.7917	28.8095	ACCEPT
NW_020822403.1	23154258	54.16	8.69565	23	25	20	0	16	8.69565	25	ACCEPT
NW_020822403.1	23223455	184.92	19.3548	31	36.3636	33	18.75	16	0.604839	17.6136	ACCEPT
NW_020822403.1	23287836	60.73	15	20	23.8095	21	3.57143	28	11.4286	20.2381	ACCEPT
NW_020822403.1	23416822	113.12	20.8333	24	22.5806	31	3.84615	26	16.9872	18.7345	ACCEPT
NW_020822403.1	23424056	91.26	9.52381	21	22.7273	22	0	20	9.52381	22.7273	ACCEPT
NW_020822403.1	23591962	34.14	13.7931	29	15.625	32	5	20	8.7931	10.625	ACCEPT
NW_020822403.1	23631468	143.2	20	20	25	32	7.69231	26	12.3077	17.3077	ACCEPT
NW_020822403.1	23831277	102.1	10.3448	29	24.1379	29	5	20	5.34483	19.1379	ACCEPT
NW_020822403.1	24121326	45.61	11.5385	26	23.8095	21	0	10	11.5385	23.8095	ACCEPT
NW_020822403.1	24494459	207.93	23.5294	17	33.3333	30	9.52381	21	14.0056	23.8095	ACCEPT
NW_020822403.1	24498154	33.15	6.45161	31	16.129	31	5.55556	18	0.896057	10.5735	ACCEPT
NW_020822403.1	24519987	199.33	7.14286	14	43.4783	23	5.88235	17	1.2605	37.5959	ACCEPT
NW_020822403.1	24737054	73.18	13.7931	29	27.2727	22	0	21	13.7931	27.2727	ACCEPT
NW_020822403.1	24799816	442.56	66.6667	9	91.6667	12	55	7	11.6667	36.6667	ACCEPT
NW_020822403.1	24840420	76.05	4.7619	21	27.027	37	0	11	4.7619	27.027	ACCEPT
NW_020822403.1	24842454	83.26	18.1818	22	31.25	16	9.09091	11	9.09091	22.1591	ACCEPT
NW_020822403.1	25018816	84.13	18.75	16	28.5714	14	0	11	18.75	28.5714	ACCEPT
NW_020822403.1	25290017	62.15	8	25	38.4615	13	0	16	8	38.4615	ACCEPT
NW_020822403.1	25321065	43.12	18.75	16	21.0526	19	0	17	18.75	21.0526	ACCEPT
NW_020822403.1	25346789	178.23	5.55556	18	22.8571	35	0	24	5.55556	22.8571	ACCEPT
NW_020822403.1	25529720	43.2	21.4286	14	25	12	0	7	21.4286	25	ACCEPT
NW_020822403.1	25586920	52.11	12.5	8	31.5789	19	0	8	12.5	31.5789	ACCEPT
NW_020822403.1	25601351	45.28	18.5185	27	20	30	8.69565	23	9.82287	11.3043	ACCEPT
NW_020822403.1	25684060	135.77	15.7895	19	28.5714	35	7.69231	13	8.09717	20.8791	ACCEPT
NW_020822403.1	25986072	190.13	20.6897	29	33.3333	18	0	9	20.6897	33.3333	ACCEPT
NW_020822403.1	26164051	108.32	10	10	31.8182	22	7.69231	13	2.30769	24.1259	ACCEPT
NW_020822404.1	63060	85.09	3.7037	27	25	20	0	17	3.7037	25	ACCEPT
NW_020822404.1	304536	33.12	6.25	16	25	20	4	25	2.25	21	ACCEPT
NW_020822405.1	3655	39.09	6.25	176	8.52018	223	3.73134	134	2.51866	4.78884	ACCEPT
NW_020822405.1	21578	622.17	81.25	16	90.9091	11	77.7778	9	3.47222	13.1313	ACCEPT
NW_020822405.1	33744	45.15	10.3448	29	13.7931	29	0	18	10.3448	13.7931	ACCEPT
NW_020822405.1	73806	143.12	11.7647	17	25.8065	31	6.25	16	5.51471	19.5565	ACCEPT
NW_020822405.1	131072	1751.12	92.5926	27	96.5517	29	84.2105	19	8.38207	12.3412	ACCEPT
NW_020822405.1	248646	350.12	22.7273	22	34.7826	23	0	17	22.7273	34.7826	ACCEPT
NW_020822406.1	39041	79.66	12.5	24	30	20	6.66667	15	5.83333	23.3333	ACCEPT
NW_020822406.1	199059	128.67	11.1111	9	45	20	6.25	16	4.86111	38.75	ACCEPT
NW_020822406.1	615156	57.1	4.7619	21	19.2308	26	0	23	4.7619	19.2308	ACCEPT
NW_020822406.1	630774	85.22	27.7778	18	30.7692	13	7.69231	13	20.0855	23.0769	ACCEPT
NW_020822406.1	673953	1233.12	64.7059	17	100	16	52.6316	19	12.0743	47.3684	ACCEPT
NW_020822406.1	709609	1363.71	92.3077	13	92.5926	27	84	25	8.30769	8.59259	ACCEPT
NW_020822406.1	760359	586.64	83.3333	6	100	13	62	8	21.3333	38	ACCEPT
NW_020822406.1	825377	369.12	45.4545	22	50	18	0	17	45.4545	50	ACCEPT
NW_020822406.1	827078	42.12	15.625	32	20	15	0	16	15.625	20	ACCEPT
NW_020822406.1	1556649	81.14	16.6667	18	30	20	4.7619	21	11.9048	25.2381	ACCEPT
NW_020822406.1	1919837	59.14	16.6667	18	18.75	32	0	10	16.6667	18.75	ACCEPT
NW_020822406.1	1969779	68.56	23.0769	13	25	12	9.09091	11	13.986	15.9091	ACCEPT
NW_020822406.1	2093669	137.89	14.2857	7	41.1765	17	0	13	14.2857	41.1765	ACCEPT
NW_020822406.1	2176193	40.23	6.66667	15	28.5714	14	0	10	6.66667	28.5714	ACCEPT
NW_020822406.1	2297339	339.05	66.6667	6	91.6667	12	0	8	66.6667	91.6667	ACCEPT
NW_020822406.1	2343637	37.43	7.69231	13	16	25	0	11	7.69231	16	ACCEPT
NW_020822406.1	2441256	56.29	15	20	35.2941	17	0	16	15	35.2941	ACCEPT
NW_020822406.1	2894229	94.82	13.3333	15	28.5714	28	7.14286	14	6.19048	21.4286	ACCEPT
NW_020822406.1	2940074	79.13	5.26316	19	40	10	0	17	5.26316	40	ACCEPT
NW_020822406.1	2997891	81.15	22.7273	22	26.3158	19	5.88235	17	16.8449	20.4334	ACCEPT
NW_020822406.1	3127526	161.25	16.6667	12	50	18	0	8	16.6667	50	ACCEPT
NW_020822406.1	3230263	135.87	7.14286	14	26.087	23	0	22	7.14286	26.087	ACCEPT
NW_020822406.1	3303009	33.13	13.0435	23	13.3333	15	0	14	13.0435	13.3333	ACCEPT
NW_020822406.1	3348142	81.56	18.75	16	23.0769	26	10	10	8.75	13.0769	ACCEPT
NW_020822406.1	3362215	155.87	30.4348	23	40	15	8.33333	12	22.1014	31.6667	ACCEPT
NW_020822406.1	3391209	174.53	38.8889	18	43.75	16	18.75	16	20.1389	25	ACCEPT
NW_020822406.1	3432560	60.27	17.3913	23	19.3548	31	0	11	17.3913	19.3548	ACCEPT
NW_020822406.1	3673458	77.41	24	25	30.7692	13	6.66667	15	17.3333	24.1026	ACCEPT
NW_020822406.1	3701096	89.56	14.2857	7	42.8571	14	9.09091	11	5.19481	33.7662	ACCEPT
NW_020822406.1	3763627	40.76	12.5	16	20	35	0	15	12.5	20	ACCEPT
NW_020822406.1	3794716	713.38	92.3077	13	100	13	87.5	8	4.80769	12.5	ACCEPT
NW_020822406.1	3894162	54.21	16.6667	12	36.3636	11	0	10	16.6667	36.3636	ACCEPT
NW_020822406.1	4118704	119.56	9.09091	11	29.4118	17	0	9	9.09091	29.4118	ACCEPT
NW_020822406.1	4134595	37.51	9.09091	22	22.7273	22	0	27	9.09091	22.7273	ACCEPT
NW_020822406.1	4360761	74.88	25	12	28.5714	7	6.66667	15	18.3333	21.9048	ACCEPT
NW_020822406.1	4609917	107.4	12	25	35	20	5.55556	18	6.44444	29.4444	ACCEPT
NW_020822406.1	4646642	79.57	6.25	16	28.125	32	0	12	6.25	28.125	ACCEPT
NW_020822406.1	4657527	222.88	26.6667	30	53.8462	13	0	8	26.6667	53.8462	ACCEPT
NW_020822406.1	4884602	68.13	20	10	23.5294	17	0	11	20	23.5294	ACCEPT
NW_020822406.1	5365575	56.56	11.5385	26	20	20	10.5263	19	1.01215	9.47368	ACCEPT
NW_020822406.1	5442525	179.64	66.6667	6	83.3333	6	16.6667	6	50	66.6667	ACCEPT
NW_020822406.1	5457534	167.88	22.2222	9	50	10	7.69231	13	14.5299	42.3077	ACCEPT
NW_020822406.1	5542742	911.09	95	20	100	11	69.2308	13	25.7692	30.7692	ACCEPT
NW_020822406.1	5676961	141	30.7692	26	33.3333	15	8.33333	12	22.4359	25	ACCEPT
NW_020822406.1	5723492	199.12	29.4118	17	33.3333	30	0	14	29.4118	33.3333	ACCEPT
NW_020822406.1	5733992	42.89	15	20	22.2222	18	0	12	15	22.2222	ACCEPT
NW_020822406.1	5823457	166.32	9.09091	11	39.1304	23	0	6	9.09091	39.1304	ACCEPT
NW_020822406.1	5840505	245.88	10	20	45.8333	24	7.14286	14	2.85714	38.6905	ACCEPT
NW_020822406.1	5898440	224.89	15.7895	19	32.1429	28	8.33333	12	7.45614	23.8095	ACCEPT
NW_020822406.1	5945885	117.38	9.09091	22	23.2558	43	0	9	9.09091	23.2558	ACCEPT
NW_020822406.1	6049729	73.09	4.7619	21	25.8065	31	0	19	4.7619	25.8065	ACCEPT
NW_020822406.1	6287935	74.16	20	10	44.4444	9	12.5	8	7.5	31.9444	ACCEPT
NW_020822406.1	6585031	130.1	5.26316	19	37.5	24	0	13	5.26316	37.5	ACCEPT
NW_020822406.1	6602750	41	14.2857	21	26.6667	15	12.5	16	1.78571	14.1667	ACCEPT
NW_020822406.1	6661474	118.05	18.75	16	36.8421	19	8.33333	12	10.4167	28.5088	ACCEPT
NW_020822406.1	6715840	140.12	7.14286	14	37.037	27	6.66667	15	0.47619	30.3704	ACCEPT
NW_020822406.1	7324046	35.09	4.34783	23	22.7273	22	0	11	4.34783	22.7273	ACCEPT
NW_020822406.1	7363549	212.12	31.5789	19	36.3636	11	0	14	31.5789	36.3636	ACCEPT
NW_020822406.1	7399896	51.94	17.6471	17	20	20	0	11	17.6471	20	ACCEPT
NW_020822406.1	7571932	53.14	22.2222	9	50	6	0	9	22.2222	50	ACCEPT
NW_020822406.1	7670035	335.41	38.4615	13	47.619	21	0	10	38.4615	47.619	ACCEPT
NW_020822406.1	7847649	101.41	13.3333	15	30.4348	23	5.26316	19	8.07018	25.1716	ACCEPT
NW_020822406.1	8393093	298.13	70	10	87.5	8	58.3333	12	11.6667	29.1667	ACCEPT
NW_020822406.1	8480433	44.74	12.5	24	18.1818	33	9.52381	21	2.97619	8.65801	ACCEPT
NW_020822406.1	8623490	426.07	77.7778	9	85.7143	14	62.5	8	15.2778	23.2143	ACCEPT
NW_020822406.1	8653863	598.21	72.7273	11	100	13	71.4286	7	1.2987	28.5714	ACCEPT
NW_020822406.1	8787250	181.97	16	25	40	25	5.55556	18	10.4444	34.4444	ACCEPT
NW_020822406.1	8816294	186.06	46.1538	13	61.5385	13	0	6	46.1538	61.5385	ACCEPT
NW_020822406.1	8817297	176.22	15.7895	19	27.907	43	0	6	15.7895	27.907	ACCEPT
NW_020822406.1	8913600	32.16	21.4286	14	22.2222	9	0	8	21.4286	22.2222	ACCEPT
NW_020822406.1	9018164	43.23	15.3846	13	20.8333	24	0	15	15.3846	20.8333	ACCEPT
NW_020822406.1	9142538	41.26	6.25	16	20	25	0	15	6.25	20	ACCEPT
NW_020822406.1	9253822	78.71	12	25	22.7273	22	8.69565	23	3.30435	14.0316	ACCEPT
NW_020822406.1	9384236	339.88	31.5789	19	50	16	22.2222	9	9.35673	27.7778	ACCEPT
NW_020822406.1	9493016	61.39	14.2857	21	24	25	7.14286	14	7.14286	16.8571	ACCEPT
NW_020822406.1	9522748	49.41	12.5	16	28.5714	14	6.66667	15	5.83333	21.9048	ACCEPT
NW_020822406.1	9558168	54.56	16.6667	12	25	12	8.33333	12	8.33333	16.6667	ACCEPT
NW_020822406.1	9815434	269.16	36.3636	11	52.381	21	10	10	26.3636	42.381	ACCEPT
NW_020822406.1	9863536	116.14	5.26316	19	22.5806	31	0	18	5.26316	22.5806	ACCEPT
NW_020822406.1	9870969	55.13	5.88235	17	20.8333	24	3.44828	29	2.43408	17.3851	ACCEPT
NW_020822406.1	10017330	993.4	95.4545	22	100	10	84	15	11.4545	16	ACCEPT
NW_020822406.1	10044716	103.89	8	25	35.7143	14	5	20	3	30.7143	ACCEPT
NW_020822406.1	10050857	39.65	14.2857	7	22.2222	18	0	9	14.2857	22.2222	ACCEPT
NW_020822406.1	10281652	116.89	22.2222	9	50	6	9.09091	11	13.1313	40.9091	ACCEPT
NW_020822406.1	10287280	132.88	22.2222	18	37.5	8	10	10	12.2222	27.5	ACCEPT
NW_020822406.1	10320966	119.81	7.69231	13	22.2222	27	0	13	7.69231	22.2222	ACCEPT
NW_020822406.1	10654388	42.54	16	25	26.087	23	6.66667	15	9.33333	19.4203	ACCEPT
NW_020822406.1	11181809	44.43	6.25	16	22.2222	18	0	14	6.25	22.2222	ACCEPT
NW_020822406.1	11430675	134.12	36.3636	11	43.75	16	0	13	36.3636	43.75	ACCEPT
NW_020822406.1	11476854	90.19	15	20	23.8095	21	6.66667	15	8.33333	17.1429	ACCEPT
NW_020822406.1	11553479	702.15	66.6667	15	85	20	50	14	16.6667	35	ACCEPT
NW_020822406.1	11625486	89.91	14.2857	14	20	25	0	12	14.2857	20	ACCEPT
NW_020822406.1	11680850	64.24	12.5	8	45.4545	11	0	11	12.5	45.4545	ACCEPT
NW_020822406.1	11708591	45.95	15	20	28	25	10	10	5	18	ACCEPT
NW_020822406.1	11802313	69.33	13.6364	22	23.3333	30	4.34783	23	9.28854	18.9855	ACCEPT
NW_020822406.1	11809059	83.12	14.2857	35	20.6897	29	0	22	14.2857	20.6897	ACCEPT
NW_020822406.1	11870017	61.03	26.6667	15	33.3333	6	7.69231	13	18.9744	25.641	ACCEPT
NW_020822406.1	11916792	39.15	8	25	19.4444	36	4.16667	24	3.83333	15.2778	ACCEPT
NW_020822406.1	11945331	76.1	5	20	18.75	32	0	12	5	18.75	ACCEPT
NW_020822406.1	12049597	39.14	23.0769	13	25	12	0	9	23.0769	25	ACCEPT
NW_020822406.1	12085679	37.88	17.6471	17	21.0526	19	8.33333	12	9.31373	12.7193	ACCEPT
NW_020822406.1	12103239	39.09	5	20	25	12	0	10	5	25	ACCEPT
NW_020822406.1	12199658	133.22	30.7692	13	50	10	0	6	30.7692	50	ACCEPT
NW_020822406.1	12259764	641.79	80	10	88.8889	18	50	10	30	38.8889	ACCEPT
NW_020822406.1	12423438	31.09	16.6667	18	20	25	9.09091	11	7.57576	10.9091	ACCEPT
NW_020822406.1	12611514	128.89	14.2857	42	21.875	32	4.54545	22	9.74026	17.3295	ACCEPT
NW_020822406.1	12684271	75.16	14.2857	7	60	10	12.5	8	1.78571	47.5	ACCEPT
NW_020822406.1	12761636	174.15	21.4286	14	33.3333	12	0	6	21.4286	33.3333	ACCEPT
NW_020822406.1	12796214	77.06	13.3333	15	21.4286	28	0	11	13.3333	21.4286	ACCEPT
NW_020822406.1	12797436	494.19	70	10	88.8889	18	68.75	16	1.25	20.1389	ACCEPT
NW_020822406.1	12807535	75.27	18.1818	11	33.3333	12	0	6	18.1818	33.3333	ACCEPT
NW_020822406.1	12982448	410.81	75	8	87.5	16	66.6667	9	8.33333	20.8333	ACCEPT
NW_020822406.1	12986728	157.9	25	24	25.8065	31	10	20	15	15.8065	ACCEPT
NW_020822406.1	13098608	57.15	5	20	26.087	23	0	7	5	26.087	ACCEPT
NW_020822406.1	13252409	513.56	53.5714	28	90	10	37.5	8	16.0714	52.5	ACCEPT
NW_020822406.1	13273025	110.43	9.09091	22	26.4706	34	0	18	9.09091	26.4706	ACCEPT
NW_020822406.1	13405042	79.16	4.34783	23	33.3333	21	0	14	4.34783	33.3333	ACCEPT
NW_020822406.1	13425689	53.16	20.8333	24	26.6667	15	11.1111	18	9.72222	15.5556	ACCEPT
NW_020822406.1	13562819	85.12	6.25	32	20.8333	24	0	17	6.25	20.8333	ACCEPT
NW_020822406.1	13709420	49.01	21.4286	14	30	20	0	17	21.4286	30	ACCEPT
NW_020822406.1	13857964	68.23	11.1111	18	35.7143	14	6.25	16	4.86111	29.4643	ACCEPT
NW_020822406.1	14134681	243.14	70	10	80	10	50	6	20	30	ACCEPT
NW_020822406.1	14201523	158.06	25	16	26.9231	26	7.14286	14	17.8571	19.7802	ACCEPT
NW_020822406.1	14204104	733.44	76.4706	17	95	20	14.2857	7	62.1849	80.7143	ACCEPT
NW_020822406.1	14348576	733.89	88.8889	9	100	10	77.7778	9	11.1111	22.2222	ACCEPT
NW_020822406.1	14442827	159.12	25	24	27.7778	18	3.84615	26	21.1538	23.9316	ACCEPT
NW_020822406.1	14664268	43.57	6.25	16	27.7778	18	0	11	6.25	27.7778	ACCEPT
NW_020822406.1	15083197	48.13	15.3846	13	23.0769	13	0	16	15.3846	23.0769	ACCEPT
NW_020822406.1	15162410	105.23	16.6667	24	26.9231	26	6.66667	15	10	20.2564	ACCEPT
NW_020822406.1	15218612	112.13	22.2222	9	35.7143	14	0	12	22.2222	35.7143	ACCEPT
NW_020822406.1	15220033	70.09	10.5263	19	37.5	16	4.16667	24	6.35965	33.3333	ACCEPT
NW_020822406.1	15237505	176.61	12.5	8	32	25	5.55556	18	6.94444	26.4444	ACCEPT
NW_020822406.1	15277008	73.22	11.7647	17	15.1515	33	0	18	11.7647	15.1515	ACCEPT
NW_020822406.1	15290436	80.22	18.75	16	30	10	0	6	18.75	30	ACCEPT
NW_020822406.1	15341661	44.92	9.09091	11	29.4118	17	0	7	9.09091	29.4118	ACCEPT
NW_020822406.1	15729389	79.12	5.88235	17	20	15	0	15	5.88235	20	ACCEPT
NW_020822406.1	15735583	32.1	4.16667	24	25	16	0	10	4.16667	25	ACCEPT
NW_020822406.1	15847590	68.24	10.7143	28	35.7143	14	7.69231	13	3.02198	28.022	ACCEPT
NW_020822406.1	16298009	76.12	16.6667	18	23.5294	17	0	12	16.6667	23.5294	ACCEPT
NW_020822406.1	16299692	270.26	57.1429	14	62.5	16	0	10	57.1429	62.5	ACCEPT
NW_020822406.1	16540378	101.9	12	25	20	25	7.14286	14	4.85714	12.8571	ACCEPT
NW_020822406.1	16655565	78.06	16.6667	6	36.3636	11	0	6	16.6667	36.3636	ACCEPT
NW_020822406.1	17077657	177.88	28.5714	14	33.3333	21	7.69231	13	20.8791	25.641	ACCEPT
NW_020822406.1	17172527	84.3	15	20	33.3333	18	0	15	15	33.3333	ACCEPT
NW_020822406.1	17282201	204.43	33.3333	24	36.3636	22	15.3846	13	17.9487	20.979	ACCEPT
NW_020822406.1	17360000	174.88	21.7391	23	31.25	16	9.375	32	12.3641	21.875	ACCEPT
NW_020822406.1	17405177	110.14	18.1818	22	33.3333	30	0	10	18.1818	33.3333	ACCEPT
NW_020822406.1	17476455	82.15	16	25	37.5	8	0	8	16	37.5	ACCEPT
NW_020822406.1	17768264	112.43	12.5	8	31.5789	19	5.88235	17	6.61765	25.6966	ACCEPT
NW_020822406.1	17906162	44.25	16.6667	12	20	20	6.25	16	10.4167	13.75	ACCEPT
NW_020822406.1	18233934	41.99	14.2857	14	30.7692	13	9.09091	11	5.19481	21.6783	ACCEPT
NW_020822406.1	18293840	122.29	8.33333	12	50	20	0	7	8.33333	50	ACCEPT
NW_020822406.1	18329858	197.81	50	6	63.6364	11	11.1111	9	38.8889	52.5253	ACCEPT
NW_020822406.1	18482018	423.17	72.7273	11	100	7	37.5	8	35.2273	62.5	ACCEPT
NW_020822406.1	18493962	40.61	13.0435	23	31.5789	19	6.66667	15	6.37681	24.9123	ACCEPT
NW_020822406.1	18585714	38.44	16	25	23.5294	17	9.09091	22	6.90909	14.4385	ACCEPT
NW_020822406.1	18800011	45.43	7.69231	13	40	10	0	9	7.69231	40	ACCEPT
NW_020822406.1	18823048	112.16	17.6471	17	28.5714	14	7.69231	13	9.95475	20.8791	ACCEPT
NW_020822406.1	18992037	101.47	12.5	24	25	32	0	23	12.5	25	ACCEPT
NW_020822406.1	19009163	227.12	30.4348	23	33.3333	18	0	15	30.4348	33.3333	ACCEPT
NW_020822406.1	19143990	556.18	75	16	92.8571	14	30	10	45	62.8571	ACCEPT
NW_020822406.1	19163067	84.65	9.09091	22	29.4118	17	0	13	9.09091	29.4118	ACCEPT
NW_020822406.1	19237489	58.01	26.3158	19	33.3333	18	11.1111	9	15.2047	22.2222	ACCEPT
NW_020822406.1	19614435	107.88	18.75	16	40	15	8.33333	12	10.4167	31.6667	ACCEPT
NW_020822406.1	19702914	610.12	37.8378	37	43.75	32	0	24	37.8378	43.75	ACCEPT
NW_020822406.1	19777889	121.12	16	25	25	20	0	19	16	25	ACCEPT
NW_020822406.1	20309276	114.15	23.0769	13	55.5556	9	0	8	23.0769	55.5556	ACCEPT
NW_020822406.1	20718431	134.26	20	10	42.1053	19	6.66667	15	13.3333	35.4386	ACCEPT
NW_020822406.1	20790706	85.17	7.69231	26	20	30	0	16	7.69231	20	ACCEPT
NW_020822406.1	20981184	128.88	21.4286	14	26.087	23	10	10	11.4286	16.087	ACCEPT
NW_020822406.1	21077628	323.28	80	10	81.8182	11	75	8	5	6.81818	ACCEPT
NW_020822406.1	21391444	389.89	27.2727	33	35.1351	37	17.6471	17	9.62567	17.4881	ACCEPT
NW_020822406.1	21469113	203.56	30	10	42.3077	26	10	10	20	32.3077	ACCEPT
NW_020822406.1	21972352	126.71	12.5	16	29.1667	24	3.7037	27	8.7963	25.463	ACCEPT
NW_020822406.1	22281190	493.09	87.5	8	92.3077	13	80	10	7.5	12.3077	ACCEPT
NW_020822406.1	22357360	46.22	7.14286	14	40	15	0	6	7.14286	40	ACCEPT
NW_020822406.1	22804614	490.36	77.7778	18	100	9	75	8	2.77778	25	ACCEPT
NW_020822406.1	22828703	74.44	20	10	50	6	0	7	20	50	ACCEPT
NW_020822406.1	22852192	32.22	6.66667	15	17.2414	29	5.88235	17	0.784314	11.359	ACCEPT
NW_020822406.1	22908017	37.45	16.6667	30	18.5185	27	6.45161	31	10.2151	12.0669	ACCEPT
NW_020822406.1	22939729	54.13	3.22581	31	17.1429	35	0	18	3.22581	17.1429	ACCEPT
NW_020822406.1	22990736	33.18	7.14286	14	21.4286	28	0	12	7.14286	21.4286	ACCEPT
NW_020822406.1	23192266	34.19	22.2222	9	30	10	0	7	22.2222	30	ACCEPT
NW_020822406.1	23216879	102.25	25	12	35.7143	14	6.66667	15	18.3333	29.0476	ACCEPT
NW_020822406.1	23296207	141.01	50	8	55.5556	9	10.5263	19	39.4737	45.0292	ACCEPT
NW_020822406.1	23427258	63.1	4.34783	23	17.2414	29	0	11	4.34783	17.2414	ACCEPT
NW_020822406.1	23433233	45.1	4.54545	22	16.6667	24	0	13	4.54545	16.6667	ACCEPT
NW_020822406.1	23588839	88.45	12.5	16	38.4615	13	6.66667	15	5.83333	31.7949	ACCEPT
NW_020822406.1	23787501	148.12	22.2222	9	24.1379	29	0	13	22.2222	24.1379	ACCEPT
NW_020822406.1	23807435	70.22	4.7619	21	20	30	0	7	4.7619	20	ACCEPT
NW_020822406.1	23951607	35.61	8.33333	12	20	20	0	11	8.33333	20	ACCEPT
NW_020822406.1	24007964	127.16	28.5714	21	29.6296	27	7.69231	13	20.8791	21.9373	ACCEPT
NW_020822406.1	24034838	112.57	71.4286	7	85.7143	7	28.5714	7	42.8571	57.1429	ACCEPT
NW_020822406.1	24079198	67.14	15.7895	19	31.5789	19	0	12	15.7895	31.5789	ACCEPT
NW_020822406.1	24179782	37.18	10	20	26.3158	19	6.25	16	3.75	20.0658	ACCEPT
NW_020822406.1	24202875	80.11	16.6667	12	26.6667	15	9.52381	21	7.14286	17.1429	ACCEPT
NW_020822406.1	24264946	257.13	25	20	34.6154	26	0	10	25	34.6154	ACCEPT
NW_020822406.1	24765325	141.12	21.875	32	27.5862	29	0	13	21.875	27.5862	ACCEPT
NW_020822407.1	410620	180.44	14.2857	7	63.6364	11	0	7	14.2857	63.6364	ACCEPT
NW_020822407.1	534600	125.13	28.5714	7	36.3636	11	0	10	28.5714	36.3636	ACCEPT
NW_020822407.1	573657	132.66	16.6667	6	33.3333	18	0	8	16.6667	33.3333	ACCEPT
NW_020822407.1	586539	901.51	55.5556	18	91.3043	23	38.0952	21	17.4603	53.2091	ACCEPT
NW_020822407.1	699327	205.81	24	25	33.3333	18	8.33333	12	15.6667	25	ACCEPT
NW_020822407.1	894216	1093.12	73.3333	15	95.2381	21	70	20	3.33333	25.2381	ACCEPT
NW_020822407.1	982221	335.26	30	10	91.6667	12	25	8	5	66.6667	ACCEPT
NW_020822407.1	997239	571.11	84.6154	13	90.9091	11	83.3333	6	1.28205	7.57576	ACCEPT
NW_020822407.1	1118079	556.4	90	10	100	10	62.5	8	27.5	37.5	ACCEPT
NW_020822407.1	1525185	1498.12	82.3529	17	100	14	69.2308	13	13.1222	30.7692	ACCEPT
NW_020822407.1	1818464	114.15	22.2222	18	23.5294	17	0	8	22.2222	23.5294	ACCEPT
NW_020822407.1	2159884	111.51	14.2857	21	19.4444	36	7.69231	13	6.59341	11.7521	ACCEPT
NW_020822407.1	2283769	664.15	80	10	90	10	72.2222	18	7.77778	17.7778	ACCEPT
NW_020822407.1	2371920	102.18	17.6471	17	25.8065	31	0	8	17.6471	25.8065	ACCEPT
NW_020822407.1	2532107	797.13	66.6667	12	100	11	40	10	26.6667	60	ACCEPT
NW_020822407.1	2651803	1393.13	84.6154	39	100	10	66.6667	12	17.9487	33.3333	ACCEPT
NW_020822407.1	2811986	1306.81	73.3333	15	91.3043	23	62.963	27	10.3704	28.3414	ACCEPT
NW_020822407.1	2997101	745.43	77.7778	18	93.75	16	75	16	2.77778	18.75	ACCEPT
NW_020822407.1	3058778	371.26	47.3684	19	56.25	16	8.33333	12	39.0351	47.9167	ACCEPT
NW_020822407.1	3322555	63.23	13.3333	15	33.3333	9	0	6	13.3333	33.3333	ACCEPT
NW_020822407.1	3336767	1993.12	69.697	33	96.1538	26	57.6923	26	12.0047	38.4615	ACCEPT
NW_020822407.1	3338695	1331.12	81.25	16	94.1176	34	39.1304	23	42.1196	54.9872	ACCEPT
NW_020822407.1	3592063	41.88	11.1111	9	33.3333	15	0	8	11.1111	33.3333	ACCEPT
NW_020822407.1	3621679	1270.14	74.2857	35	94.1176	17	50	24	24.2857	44.1176	ACCEPT
NW_020822407.1	3938733	676.22	71.4286	14	100	6	37.5	8	33.9286	62.5	ACCEPT
NW_020822407.1	4043155	199.05	20	15	35.2941	17	6.66667	15	13.3333	28.6275	ACCEPT
NW_020822407.1	4055166	38.18	16.6667	6	25	8	0	8	16.6667	25	ACCEPT
NW_020822407.1	4080416	776.13	47.0588	34	85.7143	21	43.75	16	3.30882	41.9643	ACCEPT
NW_020822407.1	4163297	214.15	25	20	38.4615	26	0	8	25	38.4615	ACCEPT
NW_020822407.1	4169644	1255.12	66.6667	15	96	25	60	20	6.66667	36	ACCEPT
NW_020822407.1	4263046	559.87	75	12	89.4737	19	60	10	15	29.4737	ACCEPT
NW_020822407.1	4355046	538.22	58.8235	17	92.8571	14	33.3333	9	25.4902	59.5238	ACCEPT
NW_020822407.1	4357332	211.91	38.4615	13	41.1765	17	11.1111	9	27.3504	30.0654	ACCEPT
NW_020822407.1	4496324	116.37	33.3333	12	44.4444	9	7.14286	14	26.1905	37.3016	ACCEPT
NW_020822407.1	4556680	60.56	6.25	16	25	12	0	22	6.25	25	ACCEPT
NW_020822407.1	4577017	89.29	14.2857	14	55.5556	9	0	12	14.2857	55.5556	ACCEPT
NW_020822407.1	4835769	134.17	25	12	30	10	0	7	25	30	ACCEPT
NW_020822407.1	4897759	454.12	33.3333	12	86.6667	15	27.2727	22	6.06061	59.3939	ACCEPT
NW_020822407.1	4983024	1425.12	84.8485	33	100	19	76.4706	17	8.3779	23.5294	ACCEPT
NW_020822407.1	5253103	41.32	13.0435	23	26.6667	15	5.88235	17	7.16113	20.7843	ACCEPT
NW_020822407.1	5281211	274.28	40	15	44	25	12.5	16	27.5	31.5	ACCEPT
NW_020822407.1	5403741	130.88	18.5185	27	27.7778	18	8.33333	12	10.1852	19.4444	ACCEPT
NW_020822407.1	5445497	1662.12	73.0769	26	96.4286	28	50	12	23.0769	46.4286	ACCEPT
NW_020822407.1	5623338	199.22	30	10	33.3333	24	0	6	30	33.3333	ACCEPT
NW_020822407.1	5673206	82.06	11.7647	17	25	12	6.25	16	5.51471	18.75	ACCEPT
NW_020822407.1	5756053	37.1	5.55556	18	25	24	0	15	5.55556	25	ACCEPT
NW_020822407.1	5845558	53.15	8.33333	12	28.5714	7	0	8	8.33333	28.5714	ACCEPT
NW_020822407.1	6318786	48.91	14.2857	7	36.3636	11	0	10	14.2857	36.3636	ACCEPT
NW_020822407.1	6838747	450.12	26.6667	30	69.2308	13	0	13	26.6667	69.2308	ACCEPT
NW_020822407.1	6995032	1449.22	67.4419	43	93.75	16	64	25	3.44186	29.75	ACCEPT
NW_020822407.1	7080137	944.73	62.5	16	91.6667	24	26.3158	19	36.1842	65.3509	ACCEPT
NW_020822407.1	7296616	108.13	17.2414	29	21.7391	23	0	11	17.2414	21.7391	ACCEPT
NW_020822407.1	7319001	1221.05	76.4706	17	92.3077	13	72.4138	29	4.0568	19.8939	ACCEPT
NW_020822407.1	7339295	1294.17	75	20	94.7368	19	50	16	25	44.7368	ACCEPT
NW_020822407.1	7462807	91.23	22.2222	9	44.4444	9	0	6	22.2222	44.4444	ACCEPT
NW_020822407.1	7572352	539.16	50	8	92.3077	13	27.2727	11	22.7273	65.035	ACCEPT
NW_020822407.1	7711795	145.13	16.6667	12	26.6667	15	0	9	16.6667	26.6667	ACCEPT
NW_020822407.1	7981618	117.81	27.2727	11	45.4545	11	9.09091	11	18.1818	36.3636	ACCEPT
NW_020822407.1	9036872	56.12	11.7647	34	14.2857	21	0	12	11.7647	14.2857	ACCEPT
NW_020822407.1	9104208	335.58	58.3333	12	62.5	8	0	9	58.3333	62.5	ACCEPT
NW_020822407.1	9149397	237.16	33.3333	9	66.6667	9	0	7	33.3333	66.6667	ACCEPT
NW_020822407.1	9327251	795.15	52.381	21	94.4444	18	50	6	2.38095	44.4444	ACCEPT
NW_020822407.1	9932292	1212.17	60	30	76.9231	26	0	7	60	76.9231	ACCEPT
NW_020822407.1	10265775	578.13	18.75	16	71.4286	21	0	9	18.75	71.4286	ACCEPT
NW_020822407.1	10300760	534.12	25.4237	59	28	50	6.97674	43	18.447	21.0233	ACCEPT
NW_020822407.1	10313892	337.76	9.43396	53	25.3731	67	5.26316	38	4.1708	20.11	ACCEPT
NW_020822407.1	10343610	187.13	22.2222	27	41.6667	12	0	9	22.2222	41.6667	ACCEPT
NW_020822407.1	10477052	240.15	16.6667	18	40.9091	22	0	8	16.6667	40.9091	ACCEPT
NW_020822407.1	10512664	64.08	12	25	28.5714	21	10	20	2	18.5714	ACCEPT
NW_020822407.1	10574098	338.16	17.2414	29	34.375	32	8	25	9.24138	26.375	ACCEPT
NW_020822407.1	10729679	136.2	14.2857	28	20	15	0	7	14.2857	20	ACCEPT
NW_020822407.1	10753333	510.22	60	10	69.2308	13	0	6	60	69.2308	ACCEPT
NW_020822407.1	10825738	1166.19	70	20	92.3077	26	66.6667	12	3.33333	25.641	ACCEPT
NW_020822407.1	10866942	178.26	29.4118	17	34.6154	26	9.09091	11	20.3209	25.5245	ACCEPT
NW_020822407.1	10943388	1197.51	57.8947	19	61.5385	26	8	24	49.8947	53.5385	ACCEPT
NW_020822407.1	11071305	613.98	73.3333	15	82.3529	17	25	12	48.3333	57.3529	ACCEPT
NW_020822407.1	11276959	1051.86	72.7273	11	81.25	16	60	10	12.7273	21.25	ACCEPT
NW_020822407.1	11337100	125.16	16.6667	6	37.5	16	0	6	16.6667	37.5	ACCEPT
NW_020822407.1	11533296	32.4	16.6667	6	27.2727	11	0	9	16.6667	27.2727	ACCEPT
NW_020822407.1	11641856	1193.18	92	25	100	19	78.5714	14	13.4286	21.4286	ACCEPT
NW_020822407.1	12117556	877.01	75	16	90.9091	11	57.1429	21	17.8571	33.7662	ACCEPT
NW_020822407.1	12144954	1089.16	59.0909	22	92.8571	14	58.3333	12	0.757576	34.5238	ACCEPT
NW_020822407.1	12233176	56.3	9.52381	21	30.7692	13	9.09091	11	0.4329	21.6783	ACCEPT
NW_020822407.1	12621151	597.25	37.5	8	93.3333	15	11	14	26.5	82.3333	ACCEPT
NW_020822407.1	12958947	1773.12	81.4815	27	95.8333	24	47.8261	23	33.6554	48.0072	ACCEPT
NW_020822407.1	13005699	1256.44	58.6207	29	92.3077	26	44.4444	9	14.1762	47.8632	ACCEPT
NW_020822407.1	13193203	907.01	50	18	80.7692	26	12	10	38	68.7692	ACCEPT
NW_020822407.1	13217455	127.89	21.4286	14	35.7143	14	10	10	11.4286	25.7143	ACCEPT
NW_020822407.1	13654444	572.01	52.9412	17	90.9091	11	44.4444	9	8.49673	46.4646	ACCEPT
NW_020822407.1	13878631	1496.12	83.3333	18	95.8333	24	75	12	8.33333	20.8333	ACCEPT
NW_020822407.1	13959054	56.58	13.6364	22	24	25	7.14286	14	6.49351	16.8571	ACCEPT
NW_020822407.1	14049661	70.17	18.75	16	21.4286	14	0	7	18.75	21.4286	ACCEPT
NW_020822407.1	14159947	359.38	31.5789	19	81.25	16	12.5	8	19.0789	68.75	ACCEPT
NW_020822407.1	14378774	169.61	30.7692	13	41.6667	24	8.33333	12	22.4359	33.3333	ACCEPT
NW_020822407.1	14440371	33.62	25	12	30	10	14.2857	7	10.7143	15.7143	ACCEPT
NW_020822407.1	14794250	48.5	10.7143	28	40	10	7.14286	14	3.57143	32.8571	ACCEPT
NW_020822407.1	15220109	472.17	38.4615	26	43.75	32	7.69231	26	30.7692	36.0577	ACCEPT
NW_020822407.1	15281776	51.15	16.6667	18	21.7391	23	0	9	16.6667	21.7391	ACCEPT
NW_020822407.1	15487012	936.22	75	8	93.75	16	65	20	10	28.75	ACCEPT
NW_020822407.1	15855851	269.53	18.75	32	34.7826	46	13.3333	30	5.41667	21.4493	ACCEPT
NW_020822407.1	15969354	390.56	52.9412	17	68.4211	19	10	10	42.9412	58.4211	ACCEPT
NW_020822407.1	15990061	791.56	76.4706	17	90	20	36.3636	11	40.107	53.6364	ACCEPT
NW_020822407.1	16147809	428.56	46.1538	13	90.9091	11	21.4286	14	24.7253	69.4805	ACCEPT
NW_020822407.1	16192210	852.87	66.6667	12	90.9091	22	58.8235	17	7.84314	32.0856	ACCEPT
NW_020822407.1	16589541	568.98	84.6154	13	87.5	8	77.7778	9	6.83761	9.72222	ACCEPT
NW_020822407.1	16703429	1123.51	70	20	93.3333	15	38.4615	13	31.5385	54.8718	ACCEPT
NW_020822407.1	16741703	736.13	38.0952	21	75	28	0	9	38.0952	75	ACCEPT
NW_020822407.1	17701877	36.23	23.0769	13	25	8	0	6	23.0769	25	ACCEPT
NW_020822407.1	17795766	125.92	13.3333	15	31.25	16	0	16	13.3333	31.25	ACCEPT
NW_020822407.1	17809423	1534.26	65.2174	23	90.9091	22	45.8333	24	19.3841	45.0758	ACCEPT
NW_020822407.1	17857814	88.15	5.26316	19	30.4348	23	0	6	5.26316	30.4348	ACCEPT
NW_020822407.1	17929504	1218.72	88.2353	17	100	16	86.3636	22	1.87166	13.6364	ACCEPT
NW_020822407.1	17934662	50.29	14.2857	14	18.5185	27	6.25	16	8.03571	12.2685	ACCEPT
NW_020822407.1	18011739	559.9	73.6842	19	83.3333	12	50	8	23.6842	33.3333	ACCEPT
NW_020822407.1	18075267	2057.12	83.3333	24	100	28	21	23	62.3333	79	ACCEPT
NW_020822407.1	18488225	72.57	6.25	16	37.5	8	0	8	6.25	37.5	ACCEPT
NW_020822407.1	18715658	418.9	81.8182	11	83.3333	6	66.6667	9	15.1515	16.6667	ACCEPT
NW_020822407.1	19252088	495.17	27.2727	11	72.2222	18	0	7	27.2727	72.2222	ACCEPT
NW_020822407.1	19507475	766.51	68.4211	19	91.6667	12	38.8889	18	29.5322	52.7778	ACCEPT
NW_020822407.1	19509771	1148.81	77.7778	18	81.8182	22	24	12	53.7778	57.8182	ACCEPT
NW_020822407.1	20130343	810.15	50	14	94.1176	17	48	25	2	46.1176	ACCEPT
NW_020822407.1	20302456	240.21	22.2222	9	73.3333	15	6.25	16	15.9722	67.0833	ACCEPT
NW_020822407.1	20341168	989.81	80.9524	21	91.6667	12	76.9231	13	4.0293	14.7436	ACCEPT
NW_020822407.1	20432317	69.12	16.6667	24	18.1818	22	0	16	16.6667	18.1818	ACCEPT
NW_020822407.1	20529415	99.28	28.5714	7	36.3636	11	12.5	8	16.0714	23.8636	ACCEPT
NW_020822407.1	20555284	596.15	30.4348	23	100	6	26	12	4.43478	74	ACCEPT
NW_020822407.1	20876513	875.51	47.619	21	90.4762	21	38.0952	21	9.52381	52.381	ACCEPT
NW_020822407.1	21218033	1436.32	68.75	32	72.7273	11	27	17	41.75	45.7273	ACCEPT
NW_020822407.1	21302909	1078.66	93.3333	15	100	15	87.5	8	5.83333	12.5	ACCEPT
NW_020822407.1	21530829	300.56	29.6296	27	55.5556	9	8.33333	24	21.2963	47.2222	ACCEPT
NW_020822407.1	21731957	1539.37	80	20	94.4444	18	52.6316	19	27.3684	41.8129	ACCEPT
NW_020822407.1	21854125	569.74	80	10	92.3077	13	66.6667	6	13.3333	25.641	ACCEPT
NW_020822407.1	22228890	142.22	14.2857	14	28.5714	14	0	6	14.2857	28.5714	ACCEPT
NW_020822407.1	22749460	941.87	72.7273	33	92.3077	13	25	20	47.7273	67.3077	ACCEPT
NW_020822407.1	22800052	39.18	18.1818	11	33.3333	6	0	7	18.1818	33.3333	ACCEPT
NW_020822407.1	22800450	1246.15	77.7778	18	92.5926	27	30	16	47.7778	62.5926	ACCEPT
NW_020822407.1	22819689	728.12	44.4444	9	94.1176	17	28.5714	7	15.873	65.5462	ACCEPT
NW_020822407.1	23100137	257.88	25	12	40	10	7.14286	14	17.8571	32.8571	ACCEPT
NW_020822407.1	23187278	30.16	16.6667	12	22.2222	18	0	14	16.6667	22.2222	ACCEPT
NW_020822409.1	5389	44.09	6.75287	696	7.46089	831	6.11855	523	0.634327	1.34234	ACCEPT
NW_020822409.1	32490	118.09	6.09756	82	11.6071	112	5.26316	57	0.834403	6.34398	ACCEPT
NW_020822409.1	42027	2720.13	96.4286	28	100	42	89.2857	28	7.14286	10.7143	ACCEPT
NW_020822409.1	68135	106.51	11.1111	54	15.2174	46	8	50	3.11111	7.21739	ACCEPT
NW_020822409.1	267250	76.67	14.2857	7	44.4444	9	12.5	8	1.78571	31.9444	ACCEPT
NW_020822409.1	308803	1380.02	86.6667	15	100	29	32	15	54.6667	68	ACCEPT
NW_020822409.1	482741	42.09	4.87805	41	14.2857	35	2.7027	37	2.17535	11.583	ACCEPT
NW_020822409.1	634657	1236.11	94.1176	17	95.2381	21	68.1818	22	25.9358	27.0563	ACCEPT
NW_020822409.1	991701	447.28	88.8889	9	90	10	57.1429	7	31.746	32.8571	ACCEPT
NW_020822409.1	1132371	2439.15	93.5484	31	95.4545	22	88	25	5.54839	7.45455	ACCEPT
NW_020822409.1	1626782	1479.98	90	20	92.8571	28	83.3333	18	6.66667	9.52381	ACCEPT
NW_020822409.1	1780117	1521.09	93.1034	29	95.4545	22	77.2727	22	15.8307	18.1818	ACCEPT
NW_020822409.1	1822263	32.1	4.7619	21	17.2414	29	3.57143	28	1.19048	13.67	ACCEPT
NW_020822409.1	2337497	1001.97	88.8889	9	92.8571	14	78.5714	14	10.3175	14.2857	ACCEPT
NW_020822409.1	2389096	154.09	3.33333	30	22.8571	35	0	16	3.33333	22.8571	ACCEPT
NW_020822409.1	2623700	1193.22	92	25	92.8571	14	85	20	7	7.85714	ACCEPT
NW_020822409.1	3217792	1878.14	83.3333	36	91.6667	36	80.9524	21	2.38095	10.7143	ACCEPT
NW_020822409.1	3441246	467.19	40	20	51.7241	29	6.25	16	33.75	45.4741	ACCEPT
NW_020822409.1	3646585	156.01	50	6	53.3333	15	16.6667	6	33.3333	36.6667	ACCEPT
NW_020822409.1	3853657	1898.22	95.4545	22	100	29	86.2069	29	9.24765	13.7931	ACCEPT
NW_020822409.1	4098144	57.1	5	20	27.2727	22	0	11	5	27.2727	ACCEPT
NW_020822409.1	4262208	1512.18	88.8889	18	100	28	87.5	16	1.38889	12.5	ACCEPT
NW_020822409.1	4377079	1706.19	87.0968	31	94.1176	17	68.9655	29	18.1313	25.1521	ACCEPT
NW_020822409.1	4911230	67.02	10.3448	29	21.0526	38	0	18	10.3448	21.0526	ACCEPT
NW_020822409.1	5203719	1827.09	96.6667	30	100	20	83.3333	18	13.3333	16.6667	ACCEPT
NW_020822409.1	5483022	463.26	71.4286	14	80	10	40	9	31.4286	40	ACCEPT
NW_020822409.1	5651224	118.15	14.2857	14	44.4444	9	0	7	14.2857	44.4444	ACCEPT
NW_020822409.1	6222462	76.13	13.6364	22	21.4286	14	0	11	13.6364	21.4286	ACCEPT
NW_020822409.1	6353644	1130.1	83.3333	24	84.6154	26	80	15	3.33333	4.61538	ACCEPT
NW_020822409.1	6357266	1675.09	94.1176	34	100	16	81.8182	22	12.2995	18.1818	ACCEPT
NW_020822409.1	6451887	1212.16	95.2381	21	100	24	80	10	15.2381	20	ACCEPT
NW_020822409.1	6516424	30.92	6.66667	15	24.2424	33	6.25	16	0.416667	17.9924	ACCEPT
NW_020822409.1	6550005	1425.14	85.7143	14	100	27	75	8	10.7143	25	ACCEPT
NW_020822409.1	6593646	349.01	57.1429	14	87.5	8	50	14	7.14286	37.5	ACCEPT
NW_020822409.1	6648863	48.31	17.6471	17	25	16	0	6	17.6471	25	ACCEPT
NW_020822409.1	6704494	1277.49	95.6522	23	100	14	86.9565	23	8.69565	13.0435	ACCEPT
NW_020822409.1	6717217	266.88	21.4286	14	47.619	21	7.14286	14	14.2857	40.4762	ACCEPT
NW_020822409.1	7286437	1244.16	86.3636	22	96	25	81.8182	11	4.54545	14.1818	ACCEPT
NW_020822409.1	7595816	984.77	91.6667	24	93.3333	15	87.5	8	4.16667	5.83333	ACCEPT
NW_020822409.1	7649944	62.1	5.55556	18	25.8065	31	5.26316	19	0.292398	20.5433	ACCEPT
NW_020822409.1	7665562	477.22	72.7273	11	90	10	71.4286	14	1.2987	18.5714	ACCEPT
NW_020822409.1	7873717	909.87	85.7143	7	95.6522	23	71.4286	14	14.2857	24.2236	ACCEPT
NW_020822409.1	8046998	47.09	2.77778	36	23.5294	34	0	14	2.77778	23.5294	ACCEPT
NW_020822409.1	8197952	598.13	60	10	94.4444	18	58.3333	12	1.66667	36.1111	ACCEPT
NW_020822409.1	8214864	1408.11	94.1176	17	100	29	68.75	16	25.3676	31.25	ACCEPT
NW_020822409.1	8485355	1092.11	92	25	93.75	16	66.6667	18	25.3333	27.0833	ACCEPT
NW_020822409.1	8507528	39.1	11.1111	9	31.25	16	10	10	1.11111	21.25	ACCEPT
NW_020822409.1	8592409	1254.73	85.7143	14	90	30	85	20	0.714286	5	ACCEPT
NW_020822409.1	8781400	1066.14	90.4762	21	100	14	83.3333	18	7.14286	16.6667	ACCEPT
NW_020822409.1	8975714	471.11	57.1429	7	63.6364	11	49	6	8.14286	14.6364	ACCEPT
NW_020822409.1	9164415	122	15.625	32	22.8571	35	0	14	15.625	22.8571	ACCEPT
NW_020822409.1	9169260	945.3	94.7368	19	100	12	83.3333	12	11.4035	16.6667	ACCEPT
NW_020822409.1	9242250	1308.09	82.7586	29	90	20	71.4286	21	11.33	18.5714	ACCEPT
NW_020822409.1	9604591	1521.09	93.1034	29	94.7368	38	58.3333	12	34.7701	36.4035	ACCEPT
NW_020822409.1	9688161	38.13	15	20	17.6471	17	0	10	15	17.6471	ACCEPT
NW_020822409.1	9750903	1123.89	88.8889	27	95.4545	22	78.5714	14	10.3175	16.8831	ACCEPT
NW_020822409.1	9937015	1626.78	93.1034	29	100	26	87.5	16	5.60345	12.5	ACCEPT
NW_020822409.1	10314344	68.51	21.4286	14	30	10	8.33333	12	13.0952	21.6667	ACCEPT
NW_020822409.1	10363149	64.38	15	20	24	25	7.14286	14	7.85714	16.8571	ACCEPT
NW_020822409.1	10448325	558.03	75	12	92.8571	14	52	6	23	40.8571	ACCEPT
NW_020822409.1	10467170	230.57	83.3333	6	88.8889	9	66.6667	6	16.6667	22.2222	ACCEPT
NW_020822409.1	10473858	33.1	11.1111	18	30.7692	13	0	6	11.1111	30.7692	ACCEPT
NW_020822409.1	10658888	52.12	9.52381	42	9.67742	31	0	26	9.52381	9.67742	ACCEPT
NW_020822409.1	10681553	1228.88	90.4762	21	100	20	84.6154	13	5.86081	15.3846	ACCEPT
NW_020822409.1	10779788	275.42	46.1538	13	100	6	12.5	8	33.6538	87.5	ACCEPT
NW_020822409.1	11390460	292.18	16.6667	18	50	26	0	7	16.6667	50	ACCEPT
NW_020822409.1	11724921	1772.62	90	20	93.1034	29	83.3333	18	6.66667	9.77011	ACCEPT
NW_020822409.1	11968144	74.13	17.3913	23	20	15	0	11	17.3913	20	ACCEPT
NW_020822409.1	12067545	2185.16	80.5556	36	87.5	48	55	25	25.5556	32.5	ACCEPT
NW_020822409.1	12069813	1705.91	87.5	24	93.3333	30	84	25	3.5	9.33333	ACCEPT
NW_020822409.1	12154798	45.1	2.85714	35	25	24	0	15	2.85714	25	ACCEPT
NW_020822409.1	12285142	422.16	62.5	8	66.6667	15	56	9	6.5	10.6667	ACCEPT
NW_020822409.1	12330299	42.12	13.7931	29	15.3846	26	3.7037	27	10.0894	11.6809	ACCEPT
NW_020822409.1	12641813	128.95	6.25	32	22.2222	27	4.34783	23	1.90217	17.8744	ACCEPT
NW_020822409.1	12767436	113.09	3.7037	27	25.7143	35	0	30	3.7037	25.7143	ACCEPT
NW_020822409.1	12870628	836.61	91.6667	12	100	13	88.8889	9	2.77778	11.1111	ACCEPT
NW_020822409.1	12894706	37.43	7.14286	28	16.6667	42	0	18	7.14286	16.6667	ACCEPT
NW_020822409.1	12986094	120.12	18.1818	33	27.2727	33	0	15	18.1818	27.2727	ACCEPT
NW_020822409.1	13031695	1306.01	68.75	16	77.2727	22	58	13	10.75	19.2727	ACCEPT
NW_020822409.1	13404709	239.12	15.3846	26	20.6897	29	0	16	15.3846	20.6897	ACCEPT
NW_020822409.1	13510360	83.12	19.0476	21	21.0526	19	0	14	19.0476	21.0526	ACCEPT
NW_020822409.1	13597068	167.01	27.7778	18	33.3333	18	10	10	17.7778	23.3333	ACCEPT
NW_020822409.1	13604571	1403.7	95.2381	21	100	22	85.7143	14	9.52381	14.2857	ACCEPT
NW_020822409.1	14251988	36.91	42.8571	7	50	6	18.1818	11	24.6753	31.8182	ACCEPT
NW_020822409.1	14324264	1348.14	85.1852	27	95	20	84.2105	19	0.974659	10.7895	ACCEPT
NW_020822409.1	14753131	1418.43	90.4762	21	96.4286	28	76.9231	13	13.5531	19.5055	ACCEPT
NW_020822409.1	14802485	30.17	8	25	18.1818	33	6.25	16	1.75	11.9318	ACCEPT
NW_020822409.1	14867072	878.58	87.5	16	100	13	66.6667	9	20.8333	33.3333	ACCEPT
NW_020822409.1	14933742	416.12	28.5714	21	35	40	4.16667	24	24.4048	30.8333	ACCEPT
NW_020822409.1	14981291	42.28	4.7619	21	20	35	0	9	4.7619	20	ACCEPT
NW_020822409.1	15383332	1856.2	93.75	16	100	21	85.7143	28	8.03571	14.2857	ACCEPT
NW_020822409.1	15768814	610.28	75	8	85.7143	14	62	8	13	23.7143	ACCEPT
NW_020822409.1	15837015	1756.23	87.5	32	92.3077	39	52.6316	19	34.8684	39.6761	ACCEPT
NW_020822409.1	16241879	903.83	81.4815	27	87.5	16	76.4706	17	5.01089	11.0294	ACCEPT
NW_020822409.1	16471800	867.52	87.5	24	92.3077	13	80	10	7.5	12.3077	ACCEPT
NW_020822409.1	16521329	221.24	36.3636	11	52.6316	19	10	10	26.3636	42.6316	ACCEPT
NW_020822409.1	16583526	2394.09	97.2973	37	100	43	80	20	17.2973	20	ACCEPT
NW_020822409.1	16697903	1966.87	92.5926	27	96.875	32	88	25	4.59259	8.875	ACCEPT
NW_020822409.1	16737267	1548.11	91.6667	36	100	16	75	16	16.6667	25	ACCEPT
NW_020822409.1	16861157	1885.38	96.4286	28	100	28	84.2105	19	12.218	15.7895	ACCEPT
NW_020822409.1	16871040	85.09	3.22581	31	29.1667	24	0	33	3.22581	29.1667	ACCEPT
NW_020822409.1	17030490	685.2	86.6667	15	95	20	65	16	21.6667	30	ACCEPT
NW_020822409.1	17048230	88.12	23.0769	13	26.087	23	0	18	23.0769	26.087	ACCEPT
NW_020822409.1	17232463	37.13	9.09091	44	17.5	40	0	27	9.09091	17.5	ACCEPT
NW_020822409.1	17452867	431.53	76.9231	13	88.8889	9	66.6667	6	10.2564	22.2222	ACCEPT
NW_020822409.1	17687932	1610.09	95.4545	22	100	29	78.5714	14	16.8831	21.4286	ACCEPT
NW_020822409.1	17717275	88.27	17.3913	23	27.5862	29	5	20	12.3913	22.5862	ACCEPT
NW_020822409.1	17740349	869.57	76.4706	17	95	20	71.4286	14	5.04202	23.5714	ACCEPT
NW_020822409.1	17742750	916.26	83.3333	12	92.8571	14	50	8	33.3333	42.8571	ACCEPT
NW_020822409.1	17821775	90.09	6.66667	30	21.7391	46	0	24	6.66667	21.7391	ACCEPT
NW_020822409.1	18083271	63.56	22.2222	18	40	20	16.6667	18	5.55556	23.3333	ACCEPT
NW_020822409.1	18255800	230.88	19.0476	21	33.3333	33	10	20	9.04762	23.3333	ACCEPT
NW_020822409.1	18420762	1534.05	91.6667	24	93.5484	31	88.2353	17	3.43137	5.31309	ACCEPT
NW_020822409.1	18467724	1581.09	92.8571	28	100	22	76.1905	21	16.6667	23.8095	ACCEPT
NW_020822409.1	18533737	1507.27	84.2105	19	88.8889	36	75	20	9.21053	13.8889	ACCEPT
NW_020822409.1	18602853	1306.86	94.4444	18	100	27	88.8889	9	5.55556	11.1111	ACCEPT
NW_020822409.1	19105145	1649.1	94.7368	19	96.6667	30	81.8182	22	12.9187	14.8485	ACCEPT
NW_020822409.1	19244936	961.38	95	20	100	13	71	7	24	29	ACCEPT
NW_020822409.1	19403774	48.38	23.0769	13	26.6667	15	7.69231	13	15.3846	18.9744	ACCEPT
NW_020822409.1	19473898	1642.12	75	20	92.5	40	67.8571	28	7.14286	24.6429	ACCEPT
NW_020822409.1	19556459	1594.1	91.8919	37	95.6522	23	70	10	21.8919	25.6522	ACCEPT
NW_020822409.1	19574162	766.09	92.8571	14	100	14	33.3333	6	59.5238	66.6667	ACCEPT
NW_020822410.1	97289	97.11	5.55556	18	25.8065	31	0	10	5.55556	25.8065	ACCEPT
NW_020822410.1	510139	52.09	6.89655	29	20	35	6.25	32	0.646552	13.75	ACCEPT
NW_020822410.1	653252	36.15	6.06061	33	14.2857	28	0	11	6.06061	14.2857	ACCEPT
NW_020822410.1	849664	151.32	25	12	34.7826	23	11.1111	18	13.8889	23.6715	ACCEPT
NW_020822410.1	850216	67.14	12.5	8	33.3333	12	0	7	12.5	33.3333	ACCEPT
NW_020822410.1	1138725	139.16	4.54545	22	27.027	37	0	20	4.54545	27.027	ACCEPT
NW_020822410.1	1216899	102.91	21.2121	33	27.2727	22	13.3333	15	7.87879	13.9394	ACCEPT
NW_020822410.1	1364576	398.81	54.5455	11	90.9091	11	33.3333	6	21.2121	57.5758	ACCEPT
NW_020822410.1	1627480	149.51	21.875	32	31.0345	29	7.14286	14	14.7321	23.8916	ACCEPT
NW_020822410.1	1637982	46.16	11.7647	17	14.8148	27	0	17	11.7647	14.8148	ACCEPT
NW_020822410.1	1842979	68.2	6.25	16	29.4118	17	0	14	6.25	29.4118	ACCEPT
NW_020822410.1	2105386	37.14	19.0476	21	25	8	0	9	19.0476	25	ACCEPT
NW_020822410.1	2399059	434.16	66.6667	15	90	10	33.3333	9	33.3333	56.6667	ACCEPT
NW_020822410.1	2626858	80.59	10.5263	19	35	20	0	7	10.5263	35	ACCEPT
NW_020822410.1	2677255	233.91	33.3333	6	71.4286	21	0	6	33.3333	71.4286	ACCEPT
NW_020822410.1	2736148	428.47	77.7778	9	87.5	16	72.7273	11	5.05051	14.7727	ACCEPT
NW_020822410.1	3095846	78.13	17.3913	23	22.7273	22	5.26316	19	12.1281	17.4641	ACCEPT
NW_020822410.1	3156318	89.15	15.3846	26	16.6667	54	0	9	15.3846	16.6667	ACCEPT
NW_020822410.1	3433401	64.91	12.5	16	17.3077	52	0	19	12.5	17.3077	ACCEPT
NW_020822410.1	3570336	262.12	21.4286	28	43.75	32	4.7619	21	16.6667	38.9881	ACCEPT
NW_020822410.1	3633681	80.1	5.55556	18	25.9259	27	4.54545	22	1.0101	21.3805	ACCEPT
NW_020822410.1	3659169	79.96	27.2727	11	33.3333	12	9.09091	11	18.1818	24.2424	ACCEPT
NW_020822410.1	3989006	207.05	23.8095	21	47.0588	17	8.33333	12	15.4762	38.7255	ACCEPT
NW_020822410.1	4019537	38.72	25	16	28.5714	14	5	20	20	23.5714	ACCEPT
NW_020822410.1	4087095	94.12	17.3913	23	24.1379	29	4	25	13.3913	20.1379	ACCEPT
NW_020822410.1	4164378	95.31	4	25	23.0769	26	0	29	4	23.0769	ACCEPT
NW_020822410.1	4290008	94.12	3.7037	27	13.8889	36	0	40	3.7037	13.8889	ACCEPT
NW_020822410.1	4302447	491.19	76.9231	13	86.3636	22	37.5	8	39.4231	48.8636	ACCEPT
NW_020822410.1	4344961	73.89	22.7273	22	33.3333	12	14.2857	14	8.44156	19.0476	ACCEPT
NW_020822410.1	4529838	32.14	16	25	17.2414	29	7.14286	14	8.85714	10.0985	ACCEPT
NW_020822410.1	4587509	113.16	18.75	32	25.7143	35	11.1111	9	7.63889	14.6032	ACCEPT
NW_020822410.1	4613199	449.07	80	10	100	16	44.4444	9	35.5556	55.5556	ACCEPT
NW_020822410.1	4704698	120.2	24.3243	37	25	28	11.1111	27	13.2132	13.8889	ACCEPT
NW_020822410.1	4767023	52.52	11.4286	35	15.3846	26	7.14286	28	4.28571	8.24176	ACCEPT
NW_020822410.1	4774717	225.41	32	25	32.2581	31	0	10	32	32.2581	ACCEPT
NW_020822410.1	4854939	103.58	13.7931	29	29.0323	31	7.69231	13	6.1008	21.34	ACCEPT
NW_020822410.1	4859856	48.12	4.87805	41	16.6667	48	0	19	4.87805	16.6667	ACCEPT
NW_020822410.1	4973470	69.12	25	16	33.3333	9	0	12	25	33.3333	ACCEPT
NW_020822410.1	5170745	37.23	14.8148	27	16	25	0	15	14.8148	16	ACCEPT
NW_020822410.1	5313017	118.08	11.1111	27	22.0339	59	10.6383	47	0.472813	11.3956	ACCEPT
NW_020822410.1	5655787	44.34	13.0435	23	21.7391	23	6.66667	30	6.37681	15.0725	ACCEPT
NW_020822410.1	5687971	409.43	39.3939	33	45.4545	33	13.6364	22	25.7576	31.8182	ACCEPT
NW_020822410.1	5739538	96.07	35	20	60	10	16.6667	12	18.3333	43.3333	ACCEPT
NW_020822410.1	5777853	63.71	7.14286	14	16.2791	43	0	17	7.14286	16.2791	ACCEPT
NW_020822410.1	5793841	161.15	46.1538	13	66.6667	6	0	8	46.1538	66.6667	ACCEPT
NW_020822410.1	5975788	67.13	19.0476	21	20	25	8	25	11.0476	12	ACCEPT
NW_020822410.1	6016283	85.1	6.89655	29	31.5789	19	3.7037	27	3.19285	27.8752	ACCEPT
NW_020822410.1	6388590	40.59	8.57143	35	20.6897	29	5.71429	35	2.85714	14.9754	ACCEPT
NW_020822410.1	6519696	60.96	18.75	16	20.6897	29	0	21	18.75	20.6897	ACCEPT
NW_020822410.1	6906397	87.13	26.3158	19	26.6667	15	0	10	26.3158	26.6667	ACCEPT
NW_020822410.1	6940478	2127.09	96.875	32	100	34	82.6087	23	14.2663	17.3913	ACCEPT
NW_020822410.1	7217552	60.43	7.69231	13	20	20	6.66667	15	1.02564	13.3333	ACCEPT
NW_020822410.1	7547618	397.13	18.5185	27	38.8889	36	0	11	18.5185	38.8889	ACCEPT
NW_020822410.1	7659001	76.19	22.2222	9	35.7143	14	0	7	22.2222	35.7143	ACCEPT
NW_020822410.1	7682989	121.52	13.0435	23	39.1304	23	10	10	3.04348	29.1304	ACCEPT
NW_020822410.1	7818782	78.14	25	20	37.5	16	10.5263	19	14.4737	26.9737	ACCEPT
NW_020822410.1	7929458	51.26	8.33333	12	21.0526	19	0	19	8.33333	21.0526	ACCEPT
NW_020822410.1	7982215	90.44	17.3913	23	22.2222	18	6.66667	15	10.7246	15.5556	ACCEPT
NW_020822410.1	8057519	113.94	26.087	23	28	25	4.7619	21	21.3251	23.2381	ACCEPT
NW_020822410.1	8162257	74.32	12.5	8	33.3333	18	0	6	12.5	33.3333	ACCEPT
NW_020822410.1	8273442	767.56	90	10	94.1176	17	63.6364	11	26.3636	30.4813	ACCEPT
NW_020822410.1	8756399	161.13	3.84615	26	26.087	23	0	14	3.84615	26.087	ACCEPT
NW_020822410.1	8806307	111.88	18.1818	33	21.4286	14	10	10	8.18182	11.4286	ACCEPT
NW_020822410.1	9056457	186.44	24.1379	29	33.3333	18	7.14286	14	16.9951	26.1905	ACCEPT
NW_020822410.1	9158375	62.15	16.6667	24	27.2727	11	8.33333	12	8.33333	18.9394	ACCEPT
NW_020822410.1	9163152	240.88	29.6296	27	35	20	0	11	29.6296	35	ACCEPT
NW_020822410.1	9177562	49.16	18.1818	11	25	20	0	17	18.1818	25	ACCEPT
NW_020822410.1	9284087	72.13	14.2857	28	16.6667	36	4.7619	21	9.52381	11.9048	ACCEPT
NW_020822410.1	9294891	36.65	10.5263	19	25	24	9.375	32	1.15132	15.625	ACCEPT
NW_020822410.1	9418113	36.56	17.6471	17	21.0526	19	10.5263	19	7.12074	10.5263	ACCEPT
NW_020822410.1	9485668	73.14	15.7895	19	31.25	16	0	11	15.7895	31.25	ACCEPT
NW_020822410.1	9523465	42.17	12.5	16	20	30	0	17	12.5	20	ACCEPT
NW_020822410.1	9676963	70.66	10	20	20	35	6.25	16	3.75	13.75	ACCEPT
NW_020822410.1	9681623	74.15	26.3158	19	30.7692	13	9.09091	22	17.2249	21.6783	ACCEPT
NW_020822410.1	9944611	53.16	8.33333	24	23.5294	34	0	30	8.33333	23.5294	ACCEPT
NW_020822410.1	10001745	126.32	21.0526	19	23.3333	30	0	16	21.0526	23.3333	ACCEPT
NW_020822410.1	10165270	65.09	4.7619	21	30	20	0	11	4.7619	30	ACCEPT
NW_020822410.1	10307795	1528.47	88	25	96.2963	27	85.7143	21	2.28571	10.582	ACCEPT
NW_020822410.1	10317096	470.13	31.25	32	36.8421	38	6.89655	29	24.3534	29.9456	ACCEPT
NW_020822410.1	10447570	388.12	16.6667	24	23.2558	43	0	18	16.6667	23.2558	ACCEPT
NW_020822410.1	10644210	61.89	18.75	16	20	20	9.09091	11	9.65909	10.9091	ACCEPT
NW_020822410.1	10728689	85.57	9.52381	21	22.2222	36	8	25	1.52381	14.2222	ACCEPT
NW_020822410.1	10763057	134.94	22.2222	9	46.6667	15	0	12	22.2222	46.6667	ACCEPT
NW_020822410.1	10767759	303.22	26.6667	15	46.1538	13	0	6	26.6667	46.1538	ACCEPT
NW_020822410.1	10858329	1211.12	94.1176	17	96.1538	26	75	8	19.1176	21.1538	ACCEPT
NW_020822410.1	10875742	58.09	5.71429	35	22.8571	35	4.54545	22	1.16883	18.3117	ACCEPT
NW_020822410.1	11029465	157.12	20	20	23.3333	30	0	23	20	23.3333	ACCEPT
NW_020822410.1	11091588	302.12	27.2727	22	35.1351	37	0	23	27.2727	35.1351	ACCEPT
NW_020822410.1	11103349	50.73	20	20	20.8333	24	10	20	10	10.8333	ACCEPT
NW_020822410.1	11270561	465.2	21.875	32	35.8974	39	6.45161	31	15.4234	29.4458	ACCEPT
NW_020822410.1	11393763	125.14	13.1579	38	22.2222	45	5.71429	35	7.44361	16.5079	ACCEPT
NW_020822410.1	11413816	210.88	22.8571	35	28.5714	14	0	21	22.8571	28.5714	ACCEPT
NW_020822410.1	11417633	83.53	23.5294	17	30	30	10	10	13.5294	20	ACCEPT
NW_020822410.1	11495461	581.12	29.6296	27	37.5	48	0	12	29.6296	37.5	ACCEPT
NW_020822410.1	11502896	75.91	8.82353	34	15.7895	38	0	26	8.82353	15.7895	ACCEPT
NW_020822410.1	11613331	57.15	10	20	15	20	0	15	10	15	ACCEPT
NW_020822410.1	11839766	513.14	85.7143	7	100	11	83.3333	6	2.38095	16.6667	ACCEPT
NW_020822410.1	11899124	162.93	15	20	24.4444	45	0	21	15	24.4444	ACCEPT
NW_020822410.1	11926947	393.88	26.9231	26	45	20	8.33333	12	18.5897	36.6667	ACCEPT
NW_020822410.1	11944058	161.61	7.69231	13	32.4324	37	5.26316	19	2.42915	27.1693	ACCEPT
NW_020822410.1	12074990	1199.14	92	25	95.2381	21	76.4706	17	15.5294	18.7675	ACCEPT
NW_020822410.1	12084931	60.26	7.69231	13	20.6897	29	0	26	7.69231	20.6897	ACCEPT
NW_020822410.1	12140297	87.13	6.25	32	17.1429	35	0	24	6.25	17.1429	ACCEPT
NW_020822410.1	12270248	133.13	14.8148	27	21.4286	28	0	22	14.8148	21.4286	ACCEPT
NW_020822410.1	12317640	49.26	8.33333	24	20.6897	29	0	20	8.33333	20.6897	ACCEPT
NW_020822410.1	12416380	30.34	12.8205	39	14.2857	42	7.14286	14	5.67766	7.14286	ACCEPT
NW_020822410.1	12497690	134.88	20	25	23.6842	38	0	19	20	23.6842	ACCEPT
NW_020822410.1	12526154	145.56	28.5714	14	30.4348	23	10	10	18.5714	20.4348	ACCEPT
NW_020822410.1	12592754	192.16	27.5862	29	37.037	27	15.3846	26	12.2016	21.6524	ACCEPT
NW_020822410.1	12725697	73.12	6.45161	31	14.2857	35	3.84615	26	2.60546	10.4396	ACCEPT
NW_020822410.1	12807242	78.1	5.26316	38	29.4118	17	3.22581	31	2.03735	26.186	ACCEPT
NW_020822410.1	12818754	219.01	26.6667	30	34.6154	26	13.6364	22	13.0303	20.979	ACCEPT
NW_020822410.1	12843440	111.24	14.2857	14	32	25	11.1111	18	3.1746	20.8889	ACCEPT
NW_020822410.1	12858275	123.65	28.5714	7	63.6364	11	0	6	28.5714	63.6364	ACCEPT
NW_020822410.1	12883914	67.09	6.89655	29	20.5128	39	3.33333	30	3.56322	17.1795	ACCEPT
NW_020822410.1	12905997	63.31	14.8148	27	25.641	39	11.1111	18	3.7037	14.5299	ACCEPT
NW_020822410.1	12958745	189.88	20.5882	34	23.6364	55	2.32558	43	18.2627	21.3108	ACCEPT
NW_020822410.1	12976171	93.2	6.06061	33	20.5882	34	3.84615	26	2.21445	16.7421	ACCEPT
NW_020822410.1	13075268	168.51	25	24	26.9231	26	9.52381	21	15.4762	17.3993	ACCEPT
NW_020822410.1	13101492	231.94	16.2791	43	25	48	6.66667	30	9.6124	18.3333	ACCEPT
NW_020822410.1	13168264	155.89	26.3158	19	29.1667	24	4.7619	21	21.5539	24.4048	ACCEPT
NW_020822410.1	13251674	194.12	20	20	23.6842	38	0	14	20	23.6842	ACCEPT
NW_020822410.1	13252729	91.77	15.3846	13	38.8889	18	7.69231	13	7.69231	31.1966	ACCEPT
NW_020822410.1	13376259	420.44	38.0952	21	41.0256	39	7.69231	13	30.4029	33.3333	ACCEPT
NW_020822410.1	13427465	99.09	7.31707	41	18.5185	54	0	38	7.31707	18.5185	ACCEPT
NW_020822410.1	13439020	114.14	14.2857	14	34.7826	23	0	15	14.2857	34.7826	ACCEPT
NW_020822410.1	13443889	266.96	13.0435	23	31.8182	44	9.375	32	3.66848	22.4432	ACCEPT
NW_020822410.1	13455641	169.15	6.25	16	32.1429	28	0	31	6.25	32.1429	ACCEPT
NW_020822410.1	13635895	106.12	25	12	45.4545	11	0	14	25	45.4545	ACCEPT
NW_020822410.1	13647642	119.17	16.6667	24	23.2558	43	11.1111	18	5.55556	12.1447	ACCEPT
NW_020822410.1	13666543	56.23	13.0435	23	21.4286	28	7.69231	13	5.35117	13.7363	ACCEPT
NW_020822410.1	13703002	121.02	16.6667	42	25.641	39	11.1111	18	5.55556	14.5299	ACCEPT
NW_020822410.1	13739168	72.12	18.1818	11	21.0526	19	0	17	18.1818	21.0526	ACCEPT
NW_020822410.1	13777688	56.15	13.1579	38	13.5135	37	0	20	13.1579	13.5135	ACCEPT
NW_020822410.1	13888699	1654.13	83.3333	12	90.3226	31	63.6364	11	19.697	26.6862	ACCEPT
NW_020822410.1	14346990	92.13	19.0476	21	26.3158	19	5.26316	19	13.7845	21.0526	ACCEPT
NW_020822410.1	14419407	204.89	40	10	50	30	13.3333	15	26.6667	36.6667	ACCEPT
NW_020822410.1	14559317	147.12	17.0732	41	20.7547	53	6.25	16	10.8232	14.5047	ACCEPT
NW_020822410.1	14730126	43.51	13.8889	36	14.6341	41	0	20	13.8889	14.6341	ACCEPT
NW_020822410.1	14758379	68.12	11.4286	35	25.9259	27	4.7619	21	6.66667	21.164	ACCEPT
NW_020822410.1	14798035	366.87	34.0909	44	34.375	32	10.7143	28	23.3766	23.6607	ACCEPT
NW_020822410.1	14817715	954.1	90.9091	22	100	12	72.7273	11	18.1818	27.2727	ACCEPT
NW_020822410.1	15031505	36.2	16.2791	43	19.2308	26	9.09091	33	7.18816	10.1399	ACCEPT
NW_020822410.1	15034342	73.89	15	20	17.3913	23	0	15	15	17.3913	ACCEPT
NW_020822410.1	15065631	1223.45	93.75	16	100	11	84.6154	13	9.13462	15.3846	ACCEPT
NW_020822410.1	15151505	524.2	73.6842	19	88.8889	9	53.8462	13	19.8381	35.0427	ACCEPT
NW_020822410.1	15236323	47.52	9.52381	21	15.1515	33	8	25	1.52381	7.15152	ACCEPT
NW_020822410.1	15238565	139.89	16	25	22.2222	45	6.66667	30	9.33333	15.5556	ACCEPT
NW_020822410.1	15279127	112.33	14.2857	14	42.1053	19	0	23	14.2857	42.1053	ACCEPT
NW_020822410.1	15348574	88.16	16	25	26.9231	26	7.69231	39	8.30769	19.2308	ACCEPT
NW_020822410.1	15401170	124.16	6.66667	45	22.449	49	0	14	6.66667	22.449	ACCEPT
NW_020822410.1	15459342	111.88	6.06061	33	20.6897	29	3.22581	31	2.8348	17.4638	ACCEPT
NW_020822410.1	15463856	55.88	11.1111	27	17.7778	45	6.97674	43	4.13437	10.801	ACCEPT
NW_020822410.1	15644495	215.06	10.5263	19	26.9231	52	9.52381	21	1.00251	17.3993	ACCEPT
NW_020822410.1	15766545	108.16	13.1579	38	23.6842	38	4.7619	21	8.39599	18.9223	ACCEPT
NW_020822410.1	15964346	514.13	75	8	100	9	33.3333	9	41.6667	66.6667	ACCEPT
NW_020822410.1	16085463	53.09	2.94118	34	16	50	0	30	2.94118	16	ACCEPT
NW_020822410.1	16130942	1323.51	76.6667	30	88.5714	35	55.5556	18	21.1111	33.0159	ACCEPT
NW_020822410.1	16165474	106.56	11.9048	42	18.4211	38	10	20	1.90476	8.42105	ACCEPT
NW_020822410.1	16695242	187.12	17.8571	28	23.6364	55	7.5	40	10.3571	16.1364	ACCEPT
NW_020822410.1	16829402	58.36	25	20	35.7143	14	0	6	25	35.7143	ACCEPT
NW_020822410.1	17070895	74.12	29.4118	17	40.9091	22	0	18	29.4118	40.9091	ACCEPT
NW_020822410.1	17168072	124.13	22.2222	18	28	25	5.26316	19	16.9591	22.7368	ACCEPT
NW_020822410.1	17205211	63.13	12.5	24	16.6667	30	4.34783	23	8.15217	12.3188	ACCEPT
NW_020822410.1	17232374	58.84	20	25	31.5789	19	11.1111	27	8.88889	20.4678	ACCEPT
NW_020822410.1	17349175	86.09	4.34783	46	16	50	3.33333	30	1.01449	12.6667	ACCEPT
NW_020822410.1	17353451	61.93	16	25	17.0213	47	0	20	16	17.0213	ACCEPT
NW_020822410.1	17383176	130.51	15.9091	44	32.1429	28	10.3448	29	5.56426	21.798	ACCEPT
NW_020822410.1	17484305	47.54	22.2222	9	36.3636	11	12.5	8	9.72222	23.8636	ACCEPT
NW_020822410.1	17494567	58.16	3.84615	26	19.0476	42	0	30	3.84615	19.0476	ACCEPT
NW_020822410.1	17538255	413.13	57.1429	14	100	11	55.5556	9	1.5873	44.4444	ACCEPT
NW_020822410.1	17654106	79.15	6.66667	15	24.2424	33	5.88235	17	0.784314	18.3601	ACCEPT
NW_020822410.1	17687209	127.12	16.6667	36	26.4706	34	4.7619	21	11.9048	21.7087	ACCEPT
NW_020822410.1	17957897	173.09	6.89655	29	34.6154	26	5.88235	17	1.0142	28.733	ACCEPT
NW_020822410.1	17981660	41.61	11.7647	17	18.5185	27	0	20	11.7647	18.5185	ACCEPT
NW_020822410.1	18085751	127.98	28.5714	21	47.0588	17	16.6667	12	11.9048	30.3922	ACCEPT
NW_020822410.1	18120074	310.28	20.8333	24	41.9355	31	6.66667	15	14.1667	35.2688	ACCEPT
NW_020822410.1	18133253	164.88	19.4444	36	21.0526	38	0	28	19.4444	21.0526	ACCEPT
NW_020822410.1	18347125	65.12	14.2857	21	15.6863	51	3.84615	26	10.4396	11.8401	ACCEPT
NW_020822410.1	18384843	73.89	18.5185	27	23.5294	17	13.3333	15	5.18519	10.1961	ACCEPT
NW_020822410.1	18605135	2250.1	96.2963	27	96.5517	29	86.4865	37	9.80981	10.0652	ACCEPT
NW_020822410.1	18686309	143.15	5.55556	18	30.4348	23	0	6	5.55556	30.4348	ACCEPT
NW_020822410.1	18819660	355.15	71.4286	7	100	6	57.1429	7	14.2857	42.8571	ACCEPT
NW_020822410.1	18868924	82.4	10	50	19.0476	42	9.09091	33	0.909091	9.95671	ACCEPT
NW_020822410.1	19010402	48.14	12.5	8	37.5	8	8.33333	12	4.16667	29.1667	ACCEPT
NW_020822410.1	19158435	157.09	4.7619	42	16.9231	65	2.7027	37	2.0592	14.2204	ACCEPT
NW_020822410.1	19207485	424.13	12.5	40	27.6596	47	4.34783	23	8.15217	23.3117	ACCEPT
NW_020822410.1	19452618	287.13	9.45946	74	16.8317	101	6.15385	65	3.30561	10.6778	ACCEPT
NW_020822412.1	18744	2818.11	89.4737	38	89.8305	59	82.8571	35	6.61654	6.97337	ACCEPT
NW_020822412.1	119437	1935.26	86.6667	30	93.5484	31	80.5556	36	6.11111	12.9928	ACCEPT
NW_020822412.1	209214	1004.9	90.9091	11	100	6	81.8182	11	9.09091	18.1818	ACCEPT
NW_020822412.1	507778	2587.2	87.0968	31	96.9697	33	84.375	32	2.72177	12.5947	ACCEPT
NW_020822412.1	628866	53.76	10.4167	48	19.6078	51	8.69565	23	1.72101	10.9122	ACCEPT
NW_020822412.1	688730	124.46	13.0952	84	23.1884	69	6.25	48	6.84524	16.9384	ACCEPT
NW_020822412.1	735890	297.05	15.6627	83	26.7606	71	12.5	40	3.16265	14.2606	ACCEPT
NW_020822412.1	751371	112.28	75	8	77.7778	18	60	10	15	17.7778	ACCEPT
NW_020822412.1	813463	69.09	3.92157	51	16.6667	54	0	40	3.92157	16.6667	ACCEPT
NW_020822412.1	973952	2196.45	86.2745	51	87.5	32	80.6452	31	5.62935	6.85484	ACCEPT
NW_020822412.1	1208814	6990.12	91.5789	95	95	100	91.0256	78	0.553306	3.97436	ACCEPT
NW_020822412.1	1264172	496.12	13	100	17.9775	89	1.69492	59	11.3051	16.2826	ACCEPT
NW_020822412.1	1272000	104.91	22.2222	27	27.027	37	8.69565	23	13.5266	18.3314	ACCEPT
NW_020822412.1	1304229	4555.16	84.375	96	87.1795	78	76.2712	59	8.10381	10.9083	ACCEPT
NW_020822412.1	1315622	166.22	13.4615	52	22.4138	58	3.38983	59	10.0717	19.024	ACCEPT
NW_020822412.1	1320376	224.88	16.6667	54	22.5806	62	12.3077	65	4.35897	10.273	ACCEPT
NW_020822412.1	1334489	97.54	18.1818	11	28	25	9.09091	11	9.09091	18.9091	ACCEPT
NW_020822412.1	1359233	77.89	22.5806	31	25	20	0	18	22.5806	25	ACCEPT
NW_020822412.1	1374980	338.61	66.6667	18	85.7143	14	63.6364	11	3.0303	22.0779	ACCEPT
NW_020822412.1	1399386	38.09	6.66667	45	14.8148	54	4.34783	46	2.31884	10.467	ACCEPT
NW_020822412.1	1454271	908.32	85.7143	21	91.3043	23	50	8	35.7143	41.3043	ACCEPT
NW_020822412.1	1537470	659.37	61.1111	18	88.8889	9	57.1429	7	3.96825	31.746	ACCEPT
NW_020822412.1	1539051	80.9	11.1111	9	16.6667	18	0	9	11.1111	16.6667	ACCEPT
NW_020822412.1	2017274	69.04	30	10	38.4615	13	10	10	20	28.4615	ACCEPT
NW_020822412.1	2113765	46.39	13.6364	22	33.3333	12	0	7	13.6364	33.3333	ACCEPT
NW_020822412.1	2120058	209.73	36.3636	11	87.5	8	10	10	26.3636	77.5	ACCEPT
NW_020822412.1	2381199	269.88	33.3333	6	45	20	0	6	33.3333	45	ACCEPT
NW_020822412.1	2478834	109.88	18.5185	27	19.2308	26	7.69231	26	10.8262	11.5385	ACCEPT
NW_020822412.1	2504882	69.37	20.8333	24	24	25	10	20	10.8333	14	ACCEPT
NW_020822412.1	2797577	116.13	25	8	31.5789	19	0	10	25	31.5789	ACCEPT
NW_020822412.1	2835320	51.12	16.6667	18	25	8	0	18	16.6667	25	ACCEPT
NW_020822412.1	2856582	182.57	11.1111	27	32.2581	31	6.25	32	4.86111	26.0081	ACCEPT
NW_020822412.1	2983191	127.12	18.1818	22	22.8571	35	0	12	18.1818	22.8571	ACCEPT
NW_020822412.1	3049165	223.05	13.9535	43	23.2143	56	9.09091	33	4.86258	14.1234	ACCEPT
NW_020822412.1	3052954	803.01	78.2609	23	87.5	24	62.5	16	15.7609	25	ACCEPT
NW_020822412.1	3156912	55.1	5.26316	19	18	50	3.7037	27	1.55945	14.2963	ACCEPT
NW_020822412.1	3215159	1691.04	85.4167	48	85.7143	42	63.1579	19	22.2588	22.5564	ACCEPT
NW_020822412.1	3246054	816.76	90.9091	11	91.3043	23	64.2857	14	26.6234	27.0186	ACCEPT
NW_020822412.1	3251383	38.31	15	20	24.1379	29	8	25	7	16.1379	ACCEPT
NW_020822412.1	3274126	73.12	13.7931	29	20.8333	24	0	21	13.7931	20.8333	ACCEPT
NW_020822412.1	3286109	105.17	25	20	40	10	6.25	16	18.75	33.75	ACCEPT
NW_020822412.1	3498064	40.09	2.5641	39	25	20	0	33	2.5641	25	ACCEPT
NW_020822412.1	3513082	66.1	7.69231	39	20.4545	44	3.84615	26	3.84615	16.6084	ACCEPT
NW_020822412.1	3720419	86.15	20	20	35	20	10.5263	19	9.47368	24.4737	ACCEPT
NW_020822412.1	3775426	52.23	21.4286	14	28.5714	14	0	6	21.4286	28.5714	ACCEPT
NW_020822412.1	3949159	36.4	20	10	23.0769	26	8.69565	23	11.3043	14.3813	ACCEPT
NW_020822412.1	4196424	380.88	19.5122	41	31.1111	45	13.0435	23	6.46872	18.0676	ACCEPT
NW_020822412.1	4345557	63.13	17.6471	17	21.2121	33	4.7619	21	12.8852	16.4502	ACCEPT
NW_020822412.1	4350578	30.36	11.1111	27	25	28	0	16	11.1111	25	ACCEPT
NW_020822412.1	4387006	42.65	10	30	15.5556	45	8	36	2	7.55556	ACCEPT
NW_020822412.1	4530267	53.03	13.5135	37	17.5	40	11.1111	18	2.4024	6.38889	ACCEPT
NW_020822412.1	4557377	45.23	8.69565	23	24.1379	29	4.7619	21	3.93375	19.376	ACCEPT
NW_020822412.1	4658420	162.22	22.2222	9	55.5556	9	0	6	22.2222	55.5556	ACCEPT
NW_020822412.1	4855292	71.28	42.8571	7	55.5556	9	7.69231	13	35.1648	47.8632	ACCEPT
NW_020822412.1	5072855	41.92	12.5	16	30.7692	13	0	9	12.5	30.7692	ACCEPT
NW_020822412.1	5326926	64.12	16	25	23.8095	21	0	17	16	23.8095	ACCEPT
NW_020822412.1	5401013	117.12	4.7619	21	22.5806	31	0	20	4.7619	22.5806	ACCEPT
NW_020822412.1	5651147	105.88	21.4286	14	27.2727	11	9.09091	11	12.3377	18.1818	ACCEPT
NW_020822412.1	5654178	77.24	15.3846	13	38.4615	13	0	10	15.3846	38.4615	ACCEPT
NW_020822412.1	6000898	57.11	5.88235	17	41.6667	12	0	10	5.88235	41.6667	ACCEPT
NW_020822412.1	6227222	109.41	22.7273	22	25	12	0	11	22.7273	25	ACCEPT
NW_020822412.1	6285217	61.77	20	10	29.4118	17	8.33333	12	11.6667	21.0784	ACCEPT
NW_020822412.1	6330750	61.13	5	20	22.2222	18	0	8	5	22.2222	ACCEPT
NW_020822412.1	6424421	38.19	10	30	20	30	7.69231	13	2.30769	12.3077	ACCEPT
NW_020822412.1	6469962	121.29	7.40741	27	35	20	0	13	7.40741	35	ACCEPT
NW_020822412.1	6544521	44.12	5.55556	18	18.5185	27	0	18	5.55556	18.5185	ACCEPT
NW_020822412.1	6565049	74.15	35.7143	14	42.8571	14	12.5	8	23.2143	30.3571	ACCEPT
NW_020822412.1	6936259	32.76	16.6667	6	26.6667	15	0	10	16.6667	26.6667	ACCEPT
NW_020822412.1	6975648	142.12	25	16	33.3333	12	0	16	25	33.3333	ACCEPT
NW_020822412.1	7269435	100.03	22.2222	9	85.7143	7	14.2857	7	7.93651	71.4286	ACCEPT
NW_020822412.1	7300115	655.73	60	15	92.3077	13	46.1538	13	13.8462	46.1538	ACCEPT
NW_020822412.1	7883869	42.67	13.3333	15	45.4545	11	0	6	13.3333	45.4545	ACCEPT
NW_020822412.1	7924784	65.24	9.09091	11	26.6667	15	0	11	9.09091	26.6667	ACCEPT
NW_020822412.1	8033358	86.33	25	8	71.4286	7	0	9	25	71.4286	ACCEPT
NW_020822412.1	8699183	40.23	15.3846	13	25	8	0	6	15.3846	25	ACCEPT
NW_020822412.1	8775915	57.73	6.66667	15	19.2308	26	0	7	6.66667	19.2308	ACCEPT
NW_020822412.1	9674304	61.12	23.5294	17	27.2727	11	0	12	23.5294	27.2727	ACCEPT
NW_020822412.1	9922874	47.05	23.5294	17	25	8	16.6667	6	6.86275	8.33333	ACCEPT
NW_020822412.1	10182236	66.17	25	12	33.3333	12	0	6	25	33.3333	ACCEPT
NW_020822412.1	10373267	86.91	10.2564	39	16.6667	54	0	23	10.2564	16.6667	ACCEPT
NW_020822412.1	10858556	55.23	16.6667	6	28.5714	7	0	6	16.6667	28.5714	ACCEPT
NW_020822412.1	11913925	67.91	11.1111	9	22.2222	18	0	12	11.1111	22.2222	ACCEPT
NW_020822412.1	11969040	470.16	50	16	90	10	46.6667	15	3.33333	43.3333	ACCEPT
NW_020822412.1	12224897	134.13	40	15	44.4444	9	0	9	40	44.4444	ACCEPT
NW_020822412.1	13176521	267.51	58.3333	12	71.4286	7	7.14286	14	51.1905	64.2857	ACCEPT
NW_020822412.1	13360228	544.13	33.3333	6	100	10	21	12	12.3333	79	ACCEPT
NW_020822412.1	13951729	45.71	14.2857	7	40	15	7.14286	14	7.14286	32.8571	ACCEPT
NW_020822412.1	14770144	56.17	8.57143	35	20	20	0	14	8.57143	20	ACCEPT
NW_020822412.1	15021233	41.18	6.66667	15	23.8095	21	0	11	6.66667	23.8095	ACCEPT
NW_020822412.1	15305084	122.91	28.5714	7	66.6667	9	9.09091	11	19.4805	57.5758	ACCEPT
NW_020822412.1	15457363	171.23	22.2222	18	77.7778	9	0	6	22.2222	77.7778	ACCEPT
NW_020822412.1	15550270	42.13	14.2857	28	21.0526	19	0	17	14.2857	21.0526	ACCEPT
[truncated: 33,439 more rows]

## Sheet: S13 Filter 2
Supplemental Table S13: Indel loci from table S12 where mutation frequency is higher in the 10 mM samples compared to the control.
#CHROM	POS	QUAL	10 mM Mutation Score	10 mM Allelic Depth	30 mM Mutation Score	30 Allelic Depth	Ctrl Mutation Score	Ctrl Allelic Depth	10 mM Relative Mutation Score	30 mM Relative Mutation Score	10<30?	10>0?
NW_020822366.1	11994	708.69	91.6667	12	100	12	87.5	8	4.16667	12.5	ACCEPT	ACCEPT
NW_020822366.1	35722	110.03	12.5	24	29.4118	17	8.33333	12	4.16667	21.0784	ACCEPT	ACCEPT
NW_020822366.1	69299	129.2	20	10	50	18	0	9	20	50	ACCEPT	ACCEPT
NW_020822366.1	81029	114.88	23.0769	13	33.3333	15	0	7	23.0769	33.3333	ACCEPT	ACCEPT
NW_020822366.1	152230	132.88	15.3846	13	40.9091	22	5.55556	18	9.82906	35.3535	ACCEPT	ACCEPT
NW_020822366.1	162048	927.23	85	20	100	15	73.3333	15	11.6667	26.6667	ACCEPT	ACCEPT
NW_020822366.1	186882	85.66	12.5	16	25.8065	31	0	6	12.5	25.8065	ACCEPT	ACCEPT
NW_020822366.1	593381	189.12	27.7778	18	38.8889	18	0	15	27.7778	38.8889	ACCEPT	ACCEPT
NW_020822366.1	652705	68.13	16.6667	18	31.25	16	0	13	16.6667	31.25	ACCEPT	ACCEPT
NW_020822366.1	1090741	141.56	11.1111	27	30.4348	23	0	20	11.1111	30.4348	ACCEPT	ACCEPT
NW_020822366.1	1092967	97.14	13.7931	29	21.0526	38	0	15	13.7931	21.0526	ACCEPT	ACCEPT
NW_020822366.1	1183794	38.24	20	15	42.8571	7	0	7	20	42.8571	ACCEPT	ACCEPT
NW_020822366.1	1252095	76.64	15.7895	19	28.5714	21	7.14286	14	8.64662	21.4286	ACCEPT	ACCEPT
NW_020822366.1	1367629	42.18	5.88235	17	20	20	0	12	5.88235	20	ACCEPT	ACCEPT
NW_020822366.1	1400721	83.9	21.4286	14	23.8095	21	0	13	21.4286	23.8095	ACCEPT	ACCEPT
NW_020822366.1	1463385	103.74	18.1818	11	46.6667	15	10	10	8.18182	36.6667	ACCEPT	ACCEPT
NW_020822366.1	1514195	405.25	40.7407	27	45.4545	22	6.25	16	34.4907	39.2045	ACCEPT	ACCEPT
NW_020822366.1	1544574	460.13	75	8	100	10	57.1429	7	17.8571	42.8571	ACCEPT	ACCEPT
NW_020822366.1	1555180	36.09	3.57143	28	19.3548	31	0	23	3.57143	19.3548	ACCEPT	ACCEPT
NW_020822366.1	1604334	32.21	13.6364	22	21.0526	19	0	19	13.6364	21.0526	ACCEPT	ACCEPT
NW_020822366.1	1635819	50.33	15.7895	19	25	24	0	9	15.7895	25	ACCEPT	ACCEPT
NW_020822366.1	1752195	80.12	17.3913	23	20	10	0	14	17.3913	20	ACCEPT	ACCEPT
NW_020822366.1	1833594	32.09	3.33333	30	14.2857	28	0	13	3.33333	14.2857	ACCEPT	ACCEPT
NW_020822366.1	1873278	70.75	8.33333	12	33.3333	21	0	9	8.33333	33.3333	ACCEPT	ACCEPT
NW_020822366.1	1912356	101.13	23.0769	13	30	10	0	11	23.0769	30	ACCEPT	ACCEPT
NW_020822366.1	2010653	42.09	3.0303	33	20	20	0	25	3.0303	20	ACCEPT	ACCEPT
NW_020822366.1	2034430	267.38	85.7143	7	91.6667	12	33.3333	9	52.381	58.3333	ACCEPT	ACCEPT
NW_020822366.1	2082192	47.24	22.2222	9	29.4118	17	11.1111	9	11.1111	18.3007	ACCEPT	ACCEPT
NW_020822366.1	2191532	126.89	16.6667	6	28.5714	7	0	7	16.6667	28.5714	ACCEPT	ACCEPT
NW_020822366.1	2207561	998.13	65	20	95	20	60	15	5	35	ACCEPT	ACCEPT
NW_020822366.1	2255362	99.26	5.88235	17	20.6897	29	4.16667	24	1.71569	16.523	ACCEPT	ACCEPT
NW_020822366.1	2314655	632.79	81.8182	11	92.3077	13	75	8	6.81818	17.3077	ACCEPT	ACCEPT
NW_020822366.1	2328193	49.18	5.55556	18	19.0476	21	0	28	5.55556	19.0476	ACCEPT	ACCEPT
NW_020822366.1	2517478	106.26	9.52381	21	33.3333	24	6.25	16	3.27381	27.0833	ACCEPT	ACCEPT
NW_020822366.1	2721969	45.15	5.55556	18	20	20	0	19	5.55556	20	ACCEPT	ACCEPT
NW_020822366.1	2825208	72.41	17.8571	28	35.2941	17	0	7	17.8571	35.2941	ACCEPT	ACCEPT
NW_020822366.1	2997012	115.13	17.6471	17	27.7778	18	6.66667	15	10.9804	21.1111	ACCEPT	ACCEPT
NW_020822366.1	3007457	33.14	16.6667	18	18.1818	22	0	10	16.6667	18.1818	ACCEPT	ACCEPT
NW_020822366.1	3021394	125.55	30	10	41.6667	12	9.09091	11	20.9091	32.5758	ACCEPT	ACCEPT
NW_020822366.1	3186530	53.26	16.6667	12	28.5714	21	0	11	16.6667	28.5714	ACCEPT	ACCEPT
NW_020822366.1	3273049	132.51	50	12	53.3333	15	0	9	50	53.3333	ACCEPT	ACCEPT
NW_020822366.1	3346655	38.23	25	8	33.3333	6	0	6	25	33.3333	ACCEPT	ACCEPT
NW_020822366.1	3364858	158.88	11.5385	26	20	35	0	20	11.5385	20	ACCEPT	ACCEPT
NW_020822366.1	3369093	32.06	16.6667	12	18.1818	22	7.14286	14	9.52381	11.039	ACCEPT	ACCEPT
NW_020822366.1	3422423	84.51	14.2857	28	40	10	8.33333	12	5.95238	31.6667	ACCEPT	ACCEPT
NW_020822366.1	3442155	39.06	16.6667	18	23.5294	17	14.2857	7	2.38095	9.2437	ACCEPT	ACCEPT
NW_020822366.1	3476246	49.12	4.54545	22	33.3333	15	0	7	4.54545	33.3333	ACCEPT	ACCEPT
NW_020822366.1	4082434	42.12	26.6667	15	27.2727	11	0	18	26.6667	27.2727	ACCEPT	ACCEPT
NW_020822366.1	4632848	74.53	23.0769	13	33.3333	12	0	9	23.0769	33.3333	ACCEPT	ACCEPT
NW_020822366.1	4844606	284.88	25	12	52.9412	17	0	14	25	52.9412	ACCEPT	ACCEPT
NW_020822366.1	5119131	219.63	13.3333	15	42.8571	28	0	6	13.3333	42.8571	ACCEPT	ACCEPT
NW_020822366.1	5281736	44.29	8.33333	12	21.7391	23	0	13	8.33333	21.7391	ACCEPT	ACCEPT
NW_020822366.1	5357854	87.28	11.1111	27	20.8333	24	7.14286	14	3.96825	13.6905	ACCEPT	ACCEPT
NW_020822366.1	5410878	63.14	16.6667	18	20	35	5	20	11.6667	15	ACCEPT	ACCEPT
NW_020822366.1	5440386	54.15	5.88235	17	19.2308	26	0	13	5.88235	19.2308	ACCEPT	ACCEPT
NW_020822366.1	5490708	134.16	28.5714	14	38.8889	18	10	10	18.5714	28.8889	ACCEPT	ACCEPT
NW_020822366.1	5584819	88.46	9.09091	22	38.8889	18	0	8	9.09091	38.8889	ACCEPT	ACCEPT
NW_020822366.1	5634891	66.14	18.1818	11	26.6667	15	0	9	18.1818	26.6667	ACCEPT	ACCEPT
NW_020822366.1	5649033	41.76	11.7647	34	26.087	23	5	20	6.76471	21.087	ACCEPT	ACCEPT
NW_020822366.1	5650057	74.06	13.6364	22	26.3158	19	0	23	13.6364	26.3158	ACCEPT	ACCEPT
NW_020822366.1	5653043	57.46	15.3846	13	38.4615	13	0	9	15.3846	38.4615	ACCEPT	ACCEPT
NW_020822366.1	5662411	116.44	17.8571	28	29.1667	24	0	13	17.8571	29.1667	ACCEPT	ACCEPT
NW_020822366.1	5710658	75.56	15	20	30	20	10	10	5	20	ACCEPT	ACCEPT
NW_020822366.1	5714639	74.16	13.3333	15	25	12	10	10	3.33333	15	ACCEPT	ACCEPT
NW_020822366.1	5849929	112.95	5.26316	19	23.8095	21	0	18	5.26316	23.8095	ACCEPT	ACCEPT
NW_020822366.1	6633501	81.09	11.1111	9	27.7778	18	0	17	11.1111	27.7778	ACCEPT	ACCEPT
NW_020822370.1	50338	42.14	14.2857	14	16.6667	18	4.7619	21	9.52381	11.9048	ACCEPT	ACCEPT
NW_020822370.1	76853	156.09	4.16667	72	14.7727	88	2.94118	68	1.22549	11.8316	ACCEPT	ACCEPT
NW_020822370.1	118813	242.87	15.3846	39	36.8421	19	7.89474	38	7.48988	28.9474	ACCEPT	ACCEPT
NW_020822370.1	135208	307.12	20.8333	24	22.8571	35	3.84615	26	16.9872	19.011	ACCEPT	ACCEPT
NW_020822370.1	147584	351.13	12.5	24	32.3529	34	0	11	12.5	32.3529	ACCEPT	ACCEPT
NW_020822370.1	165071	113.95	16.6667	12	26.6667	15	5.55556	18	11.1111	21.1111	ACCEPT	ACCEPT
NW_020822370.1	175736	972.12	73.3333	15	95.2381	21	64.2857	14	9.04762	30.9524	ACCEPT	ACCEPT
NW_020822370.1	177400	139.12	20.8333	24	32	25	4.7619	21	16.0714	27.2381	ACCEPT	ACCEPT
NW_020822370.1	384988	339.67	66.6667	12	90	10	33.3333	9	33.3333	56.6667	ACCEPT	ACCEPT
NW_020822370.1	730218	65.34	10	10	35.7143	14	6.66667	15	3.33333	29.0476	ACCEPT	ACCEPT
NW_020822370.1	769427	231.15	40	10	46.6667	15	0	8	40	46.6667	ACCEPT	ACCEPT
NW_020822370.1	962577	50.19	6.25	16	37.5	8	0	8	6.25	37.5	ACCEPT	ACCEPT
NW_020822370.1	1129640	492.16	71.4286	14	84.6154	13	42.8571	7	28.5714	41.7582	ACCEPT	ACCEPT
NW_020822370.1	1358286	54.8	16.6667	6	31.25	16	0	7	16.6667	31.25	ACCEPT	ACCEPT
NW_020822370.1	1486032	64.26	10	20	26.3158	19	9.09091	11	0.909091	17.2249	ACCEPT	ACCEPT
NW_020822370.1	1489596	35.46	14.2857	14	18.75	32	0	10	14.2857	18.75	ACCEPT	ACCEPT
NW_020822370.1	1658954	134.15	14.2857	14	27.2727	22	5	20	9.28571	22.2727	ACCEPT	ACCEPT
NW_020822370.1	1785201	66.26	11.7647	17	19.2308	26	0	11	11.7647	19.2308	ACCEPT	ACCEPT
NW_020822370.1	2189378	163.25	17.6471	17	42.8571	21	6.66667	15	10.9804	36.1905	ACCEPT	ACCEPT
NW_020822370.1	2363017	192.17	14.2857	28	25	32	6.66667	30	7.61905	18.3333	ACCEPT	ACCEPT
NW_020822370.1	2423020	50.11	5.55556	18	31.25	16	0	8	5.55556	31.25	ACCEPT	ACCEPT
NW_020822370.1	2463044	489.5	85.7143	7	100	10	83.3333	6	2.38095	16.6667	ACCEPT	ACCEPT
NW_020822370.1	2492672	81.02	28.5714	7	37.5	16	18.1818	11	10.3896	19.3182	ACCEPT	ACCEPT
NW_020822370.1	2658357	46.25	11.7647	17	28.5714	21	0	9	11.7647	28.5714	ACCEPT	ACCEPT
NW_020822370.1	2926200	120.19	8.33333	12	40	10	6.25	16	2.08333	33.75	ACCEPT	ACCEPT
NW_020822370.1	3168295	96.13	17.6471	17	30.7692	13	13.3333	15	4.31373	17.4359	ACCEPT	ACCEPT
NW_020822370.1	3401634	170.53	21.4286	14	40	20	10	10	11.4286	30	ACCEPT	ACCEPT
NW_020822370.1	3841102	357.13	21.0526	19	52	25	0	9	21.0526	52	ACCEPT	ACCEPT
NW_020822370.1	4149072	314.12	41.1765	17	60	10	7.69231	13	33.4842	52.3077	ACCEPT	ACCEPT
NW_020822370.1	4459376	39.12	20	15	21.4286	28	0	16	20	21.4286	ACCEPT	ACCEPT
NW_020822370.1	4461697	85.81	22.2222	9	33.3333	15	12.5	8	9.72222	20.8333	ACCEPT	ACCEPT
NW_020822370.1	4480705	157.88	16.6667	24	25	24	0	8	16.6667	25	ACCEPT	ACCEPT
NW_020822370.1	4703612	33.21	12.5	16	26.6667	15	6.25	16	6.25	20.4167	ACCEPT	ACCEPT
NW_020822370.1	4757314	70.29	21.7391	23	26.9231	26	8.33333	12	13.4058	18.5897	ACCEPT	ACCEPT
NW_020822370.1	5048495	78.14	22.7273	22	23.0769	26	0	16	22.7273	23.0769	ACCEPT	ACCEPT
NW_020822370.1	5252250	64.09	11.5385	26	28	25	0	9	11.5385	28	ACCEPT	ACCEPT
NW_020822370.1	5271209	115.09	3.22581	31	22.2222	27	0	11	3.22581	22.2222	ACCEPT	ACCEPT
NW_020822370.1	5422342	156.16	13.0435	23	45.8333	24	0	9	13.0435	45.8333	ACCEPT	ACCEPT
NW_020822370.1	5554182	56.69	10	20	20.5882	34	9.09091	22	0.909091	11.4973	ACCEPT	ACCEPT
NW_020822370.1	5599050	127.73	26.6667	30	30	20	0	8	26.6667	30	ACCEPT	ACCEPT
NW_020822370.1	5860113	35.75	9.09091	22	27.2727	11	7.14286	14	1.94805	20.1299	ACCEPT	ACCEPT
NW_020822370.1	5993305	94.65	11.1111	18	21.0526	38	0	22	11.1111	21.0526	ACCEPT	ACCEPT
NW_020822370.1	6206924	970.21	70.5882	17	90.9091	22	66.6667	6	3.92157	24.2424	ACCEPT	ACCEPT
NW_020822370.1	6259234	47.27	9.52381	21	26.9231	26	7.69231	13	1.8315	19.2308	ACCEPT	ACCEPT
NW_020822370.1	6851423	164	6.25	16	14.2857	28	0	12	6.25	14.2857	ACCEPT	ACCEPT
NW_020822370.1	6861651	80.72	33.3333	15	50	10	0	8	33.3333	50	ACCEPT	ACCEPT
NW_020822370.1	6893292	62.65	12.5	24	31.5789	19	0	13	12.5	31.5789	ACCEPT	ACCEPT
NW_020822370.1	6898654	116	19.0476	21	33.3333	18	7.69231	13	11.3553	25.641	ACCEPT	ACCEPT
NW_020822370.1	6993832	61.1	15.3846	13	25	16	10	10	5.38462	15	ACCEPT	ACCEPT
NW_020822370.1	7319963	257.1	66.6667	6	85.7143	14	50	10	16.6667	35.7143	ACCEPT	ACCEPT
NW_020822370.1	7500779	127.15	5.88235	17	31.8182	22	0	16	5.88235	31.8182	ACCEPT	ACCEPT
NW_020822370.1	7632067	35.32	15.3846	13	25	20	0	8	15.3846	25	ACCEPT	ACCEPT
NW_020822370.1	7671333	94.81	21.0526	19	40	10	9.09091	11	11.9617	30.9091	ACCEPT	ACCEPT
NW_020822370.1	7921913	496.05	60	15	91.6667	12	36.3636	11	23.6364	55.303	ACCEPT	ACCEPT
NW_020822370.1	7985738	200.91	16.6667	12	43.75	16	0	8	16.6667	43.75	ACCEPT	ACCEPT
NW_020822370.1	8060068	108.73	25	20	31.8182	22	10	20	15	21.8182	ACCEPT	ACCEPT
NW_020822370.1	8110802	57.27	14.2857	14	20	15	7.14286	14	7.14286	12.8571	ACCEPT	ACCEPT
NW_020822370.1	8116071	52.52	14.2857	14	40	10	7.14286	14	7.14286	32.8571	ACCEPT	ACCEPT
NW_020822370.1	8216448	82.53	21.0526	19	33.3333	18	16.6667	12	4.38596	16.6667	ACCEPT	ACCEPT
NW_020822370.1	8299849	54.12	16.6667	18	22.2222	27	0	14	16.6667	22.2222	ACCEPT	ACCEPT
NW_020822370.1	8330692	40.42	8.33333	12	28.5714	14	0	6	8.33333	28.5714	ACCEPT	ACCEPT
NW_020822370.1	8425842	77.33	15.3846	13	27.2727	22	0	6	15.3846	27.2727	ACCEPT	ACCEPT
NW_020822370.1	8606562	255.81	29.4118	17	45	20	9.52381	21	19.888	35.4762	ACCEPT	ACCEPT
NW_020822370.1	8646914	66.17	21.4286	14	33.3333	6	0	7	21.4286	33.3333	ACCEPT	ACCEPT
NW_020822370.1	8699788	100.78	14.2857	7	31.8182	22	10	10	4.28571	21.8182	ACCEPT	ACCEPT
NW_020822370.1	8852108	43.1	4.7619	21	21.0526	19	0	20	4.7619	21.0526	ACCEPT	ACCEPT
NW_020822370.1	8899801	36.15	17.8571	28	20	20	5.55556	18	12.3016	14.4444	ACCEPT	ACCEPT
NW_020822370.1	8943758	105.1	40	10	46.1538	13	12.5	8	27.5	33.6538	ACCEPT	ACCEPT
NW_020822370.1	9006748	91.17	19.3548	31	23.5294	17	0	8	19.3548	23.5294	ACCEPT	ACCEPT
NW_020822370.1	9143655	73.55	14.2857	14	25.9259	27	5.55556	18	8.73016	20.3704	ACCEPT	ACCEPT
NW_020822370.1	9174811	76.32	5.26316	19	17.2414	29	0	6	5.26316	17.2414	ACCEPT	ACCEPT
NW_020822370.1	9180103	685.2	70	10	92.8571	14	61.1111	18	8.88889	31.746	ACCEPT	ACCEPT
NW_020822370.1	9267847	61.18	9.09091	11	29.4118	17	0	15	9.09091	29.4118	ACCEPT	ACCEPT
NW_020822370.1	9375438	218.41	11.1111	27	36.6667	30	9.52381	21	1.5873	27.1429	ACCEPT	ACCEPT
NW_020822370.1	9521338	118.13	20	10	33.3333	18	0	14	20	33.3333	ACCEPT	ACCEPT
NW_020822370.1	9588675	107.12	28.5714	14	29.4118	17	0	12	28.5714	29.4118	ACCEPT	ACCEPT
NW_020822370.1	9961111	420.12	30	30	33.3333	42	4.54545	44	25.4545	28.7879	ACCEPT	ACCEPT
NW_020822370.1	10117137	155.17	33.3333	12	35.2941	17	0	7	33.3333	35.2941	ACCEPT	ACCEPT
NW_020822370.1	10473842	1379.53	85.7143	14	89.2857	28	84	25	1.71429	5.28571	ACCEPT	ACCEPT
NW_020822370.1	10905605	1665.17	91.6667	36	100	24	84.2105	19	7.45614	15.7895	ACCEPT	ACCEPT
NW_020822370.1	11412057	1003.12	78.5714	14	100	20	37.5	8	41.0714	62.5	ACCEPT	ACCEPT
NW_020822370.1	11694453	97.22	16.6667	12	17.3913	23	0	6	16.6667	17.3913	ACCEPT	ACCEPT
NW_020822370.1	11832400	193.05	30	10	43.75	16	7.69231	13	22.3077	36.0577	ACCEPT	ACCEPT
NW_020822370.1	12112627	133.13	18.75	16	30.7692	13	0	10	18.75	30.7692	ACCEPT	ACCEPT
NW_020822370.1	12474461	32.16	18.1818	11	25	8	8.33333	12	9.84848	16.6667	ACCEPT	ACCEPT
NW_020822370.1	12539847	180.97	14.2857	7	50	20	8.69565	23	5.59006	41.3043	ACCEPT	ACCEPT
NW_020822370.1	12804572	1052.17	76.4706	17	100	7	61.1111	18	15.3595	38.8889	ACCEPT	ACCEPT
NW_020822370.1	12887176	849.12	53.3333	15	92.3077	26	29.4118	17	23.9216	62.8959	ACCEPT	ACCEPT
NW_020822370.1	13069980	33.15	14.2857	14	15.3846	26	0	17	14.2857	15.3846	ACCEPT	ACCEPT
NW_020822370.1	13369302	38.75	12.5	8	50	8	0	6	12.5	50	ACCEPT	ACCEPT
NW_020822370.1	13867066	708.51	71.4286	14	91.6667	12	46.6667	15	24.7619	45	ACCEPT	ACCEPT
NW_020822370.1	14016616	885.11	94.4444	18	100	12	42.8571	7	51.5873	57.1429	ACCEPT	ACCEPT
NW_020822370.1	14094520	81.31	14.2857	7	42.8571	7	0	6	14.2857	42.8571	ACCEPT	ACCEPT
NW_020822370.1	14345984	37.09	4	25	22.7273	22	0	15	4	22.7273	ACCEPT	ACCEPT
NW_020822370.1	14670450	60.25	5.88235	17	28.5714	14	0	6	5.88235	28.5714	ACCEPT	ACCEPT
NW_020822370.1	14726576	31.26	10	10	15.7895	19	0	7	10	15.7895	ACCEPT	ACCEPT
NW_020822370.1	14729723	576.88	33.3333	30	50	16	0	7	33.3333	50	ACCEPT	ACCEPT
NW_020822370.1	14762386	1921.22	71.4286	28	91.8919	37	70.8333	24	0.595238	21.0586	ACCEPT	ACCEPT
NW_020822370.1	14904142	171.17	27.2727	22	41.6667	12	0	7	27.2727	41.6667	ACCEPT	ACCEPT
NW_020822370.1	15060991	36.36	12.5	8	17.6471	17	0	8	12.5	17.6471	ACCEPT	ACCEPT
NW_020822370.1	15228507	621.22	52.9412	17	54.5455	11	0	6	52.9412	54.5455	ACCEPT	ACCEPT
NW_020822370.1	15428512	1228.87	87.5	24	90.9091	22	54.5455	11	32.9545	36.3636	ACCEPT	ACCEPT
NW_020822370.1	15707115	1055.22	66.6667	24	93.75	16	63.1579	19	3.50877	30.5921	ACCEPT	ACCEPT
NW_020822370.1	15967307	579.13	66.6667	21	90.9091	11	57.1429	7	9.52381	33.7662	ACCEPT	ACCEPT
NW_020822370.1	16105735	2314.09	89.7436	39	97.1429	35	72.2222	18	17.5214	24.9206	ACCEPT	ACCEPT
NW_020822370.1	16105971	1767.13	79.1667	24	93.5484	31	72	25	7.16667	21.5484	ACCEPT	ACCEPT
NW_020822370.1	16330419	690.12	61.1111	18	100	14	33.3333	9	27.7778	66.6667	ACCEPT	ACCEPT
NW_020822370.1	16486048	30.48	12.5	8	18.75	16	0	8	12.5	18.75	ACCEPT	ACCEPT
NW_020822370.1	16500417	374.13	23.5294	17	63.6364	22	5	20	18.5294	58.6364	ACCEPT	ACCEPT
NW_020822370.1	16591031	884.2	58.8235	17	93.75	16	55	20	3.82353	38.75	ACCEPT	ACCEPT
NW_020822370.1	16842786	1359.53	67.5	40	90.4762	21	50	12	17.5	40.4762	ACCEPT	ACCEPT
NW_020822370.1	17110814	61.14	14.2857	21	37.5	8	0	9	14.2857	37.5	ACCEPT	ACCEPT
NW_020822370.1	17251172	1585.25	66.6667	21	92.8571	28	59.0909	22	7.57576	33.7662	ACCEPT	ACCEPT
NW_020822370.1	17464768	473.28	35	20	47.3684	38	8.33333	24	26.6667	39.0351	ACCEPT	ACCEPT
NW_020822370.1	17573324	43.22	12.5	8	22.2222	9	0	7	12.5	22.2222	ACCEPT	ACCEPT
NW_020822370.1	17577513	113.22	25	20	41.6667	12	0	7	25	41.6667	ACCEPT	ACCEPT
NW_020822370.1	17672908	474.15	75	8	100	8	60	10	15	40	ACCEPT	ACCEPT
NW_020822370.1	17869000	1295.05	70	20	91.6667	24	54.5455	22	15.4545	37.1212	ACCEPT	ACCEPT
NW_020822370.1	17951483	58.13	28.5714	7	30.7692	13	0	10	28.5714	30.7692	ACCEPT	ACCEPT
NW_020822370.1	17964785	324.22	33.3333	18	47.619	21	6.25	16	27.0833	41.369	ACCEPT	ACCEPT
NW_020822370.1	17966612	92.51	20	10	23.5294	17	7.14286	14	12.8571	16.3866	ACCEPT	ACCEPT
NW_020822370.1	18214060	62.62	37.5	8	71.4286	7	14.2857	7	23.2143	57.1429	ACCEPT	ACCEPT
NW_020822370.1	18261668	91.14	6.25	16	29.6296	27	0	7	6.25	29.6296	ACCEPT	ACCEPT
NW_020822370.1	18411364	989.17	58.8235	17	92.5926	27	37.5	16	21.3235	55.0926	ACCEPT	ACCEPT
NW_020822370.1	18428493	126.13	13.3333	15	29.4118	17	0	16	13.3333	29.4118	ACCEPT	ACCEPT
NW_020822370.1	18767974	1493.84	95.4545	22	100	25	85.7143	14	9.74026	14.2857	ACCEPT	ACCEPT
NW_020822370.1	18772314	745.13	50	12	92.5926	27	27.7778	18	22.2222	64.8148	ACCEPT	ACCEPT
NW_020822370.1	19438940	81.66	12.5	8	55.5556	9	0	6	12.5	55.5556	ACCEPT	ACCEPT
NW_020822370.1	19464296	36.79	5.88235	17	31.25	16	0	11	5.88235	31.25	ACCEPT	ACCEPT
NW_020822370.1	19545463	106.13	10	20	23.3333	30	0	10	10	23.3333	ACCEPT	ACCEPT
NW_020822370.1	19683938	253.43	57.1429	7	60	15	0	6	57.1429	60	ACCEPT	ACCEPT
NW_020822370.1	19980670	325.15	33.3333	18	50	20	0	8	33.3333	50	ACCEPT	ACCEPT
NW_020822370.1	20431651	99.9	16.6667	6	57.1429	7	0	9	16.6667	57.1429	ACCEPT	ACCEPT
NW_020822370.1	20537063	1325.15	86.3636	22	93.3333	30	58.3333	12	28.0303	35	ACCEPT	ACCEPT
NW_020822370.1	20714602	1437.73	79.1667	24	93.75	16	63.6364	11	15.5303	30.1136	ACCEPT	ACCEPT
NW_020822370.1	21248666	64.56	8.69565	23	23.8095	21	0	9	8.69565	23.8095	ACCEPT	ACCEPT
NW_020822370.1	21262258	258.88	26.087	23	44.4444	18	18.1818	11	7.90514	26.2626	ACCEPT	ACCEPT
NW_020822370.1	21321245	257.13	25	12	71.4286	7	0	9	25	71.4286	ACCEPT	ACCEPT
NW_020822370.1	22199766	45.69	11.1111	9	23.8095	21	0	7	11.1111	23.8095	ACCEPT	ACCEPT
NW_020822370.1	22227976	658.13	63.6364	11	100	9	37.5	8	26.1364	62.5	ACCEPT	ACCEPT
NW_020822370.1	22359883	219.13	33.3333	6	72.7273	11	0	9	33.3333	72.7273	ACCEPT	ACCEPT
NW_020822370.1	22376560	591.63	83.3333	6	100	13	66.6667	9	16.6667	33.3333	ACCEPT	ACCEPT
NW_020822370.1	22523180	1132.17	73.913	23	94.4444	18	36.3636	11	37.5494	58.0808	ACCEPT	ACCEPT
NW_020822370.1	22544048	40.46	9.09091	11	28.5714	7	0	11	9.09091	28.5714	ACCEPT	ACCEPT
NW_020822370.1	22895974	984.97	87.5	8	90.9091	22	62.5	16	25	28.4091	ACCEPT	ACCEPT
NW_020822370.1	23117611	62.26	20	15	25	20	7.69231	13	12.3077	17.3077	ACCEPT	ACCEPT
NW_020822370.1	23161556	34.85	13.6364	22	19.2308	26	0	9	13.6364	19.2308	ACCEPT	ACCEPT
NW_020822370.1	23219202	888.12	71.4286	14	100	18	70	10	1.42857	30	ACCEPT	ACCEPT
NW_020822370.1	23405100	1057.14	70	20	94.4444	18	66.6667	15	3.33333	27.7778	ACCEPT	ACCEPT
NW_020822370.1	23412665	1181.53	52.9412	17	91.6667	24	47.0588	17	5.88235	44.6078	ACCEPT	ACCEPT
NW_020822370.1	23745067	495.16	56.25	16	61.1111	18	8.33333	12	47.9167	52.7778	ACCEPT	ACCEPT
NW_020822370.1	24051755	997.2	83.3333	12	94.1176	17	68.75	16	14.5833	25.3676	ACCEPT	ACCEPT
NW_020822370.1	24656231	1217.12	70.5882	17	96.6667	30	33.3333	9	37.2549	63.3333	ACCEPT	ACCEPT
NW_020822370.1	24899733	795.26	71.4286	21	91.6667	12	50	16	21.4286	41.6667	ACCEPT	ACCEPT
NW_020822370.1	25128711	849.32	75	16	93.3333	15	58.3333	12	16.6667	35	ACCEPT	ACCEPT
NW_020822370.1	25327783	129.39	15.3846	13	71.4286	7	0	6	15.3846	71.4286	ACCEPT	ACCEPT
NW_020822370.1	25440072	33.57	5.55556	18	18.75	32	0	24	5.55556	18.75	ACCEPT	ACCEPT
NW_020822370.1	25498044	231.91	30	10	91.6667	12	14.2857	7	15.7143	77.381	ACCEPT	ACCEPT
NW_020822370.1	25825801	1155.15	75	28	94.4444	18	54.5455	11	20.4545	39.899	ACCEPT	ACCEPT
NW_020822370.1	26361098	327.28	21.4286	28	52.6316	19	6.25	16	15.1786	46.3816	ACCEPT	ACCEPT
NW_020822370.1	26917592	49.51	8.33333	12	25	24	0	18	8.33333	25	ACCEPT	ACCEPT
NW_020822370.1	27327622	847.01	71.4286	21	90.9091	11	57.1429	14	14.2857	33.7662	ACCEPT	ACCEPT
NW_020822370.1	27598547	151.17	20	10	41.6667	12	0	7	20	41.6667	ACCEPT	ACCEPT
NW_020822370.1	27686641	399.22	20	15	57.1429	28	0	6	20	57.1429	ACCEPT	ACCEPT
NW_020822370.1	27992792	56.09	3.7037	27	25	28	0	18	3.7037	25	ACCEPT	ACCEPT
NW_020822370.1	28060110	46.18	11.1111	18	28.5714	7	0	7	11.1111	28.5714	ACCEPT	ACCEPT
NW_020822370.1	28411173	57.77	11.1111	18	30.7692	13	0	9	11.1111	30.7692	ACCEPT	ACCEPT
NW_020822370.1	28561619	54.54	12.5	8	21.0526	19	0	11	12.5	21.0526	ACCEPT	ACCEPT
NW_020822370.1	28653901	39.58	6.66667	15	44.4444	9	5	20	1.66667	39.4444	ACCEPT	ACCEPT
NW_020822370.1	28778010	55.43	14.2857	7	27.2727	11	0	9	14.2857	27.2727	ACCEPT	ACCEPT
NW_020822370.1	28927445	90.81	24	25	30.7692	13	10	10	14	20.7692	ACCEPT	ACCEPT
NW_020822370.1	29031340	933.5	89.4737	19	90.9091	11	54.1667	24	35.307	36.7424	ACCEPT	ACCEPT
NW_020822370.1	29116483	80.09	14.2857	7	62.5	8	0	10	14.2857	62.5	ACCEPT	ACCEPT
NW_020822370.1	29955093	580.37	58.8235	17	61.1111	18	0	7	58.8235	61.1111	ACCEPT	ACCEPT
NW_020822370.1	29985084	1199.14	70.5882	17	92.5926	27	61.9048	21	8.68347	30.6878	ACCEPT	ACCEPT
NW_020822370.1	30045561	195.18	6.66667	15	37.037	27	0	13	6.66667	37.037	ACCEPT	ACCEPT
NW_020822370.1	30110736	87.89	10.3448	29	27.5862	29	0	24	10.3448	27.5862	ACCEPT	ACCEPT
NW_020822370.1	30145050	136.14	18.75	16	41.1765	17	0	9	18.75	41.1765	ACCEPT	ACCEPT
NW_020822370.1	30147345	55.02	20	10	20.8333	24	10	10	10	10.8333	ACCEPT	ACCEPT
NW_020822370.1	30167837	45.55	14.2857	14	36.3636	11	0	6	14.2857	36.3636	ACCEPT	ACCEPT
NW_020822370.1	30345608	65.17	22.2222	9	37.5	8	0	7	22.2222	37.5	ACCEPT	ACCEPT
NW_020822370.1	30455988	62.22	15.3846	26	19.2308	26	0	7	15.3846	19.2308	ACCEPT	ACCEPT
NW_020822370.1	30476293	197.53	21.4286	14	53.3333	15	0	14	21.4286	53.3333	ACCEPT	ACCEPT
NW_020822370.1	30879400	126.1	6.89655	29	39.1304	23	5.55556	18	1.341	33.5749	ACCEPT	ACCEPT
NW_020822370.1	30880615	824.09	91.6667	12	94.1176	17	87.5	8	4.16667	6.61765	ACCEPT	ACCEPT
NW_020822370.1	30907802	56.89	17.8571	28	18.1818	22	13.0435	23	4.81366	5.13834	ACCEPT	ACCEPT
NW_020822370.1	31076405	42.2	9.09091	33	29.4118	17	8.69565	23	0.395257	20.7161	ACCEPT	ACCEPT
NW_020822370.1	31187505	74.16	14.2857	14	36.3636	11	0	18	14.2857	36.3636	ACCEPT	ACCEPT
NW_020822370.1	31448749	314.12	18.1818	33	19.5652	46	4.16667	24	14.0152	15.3986	ACCEPT	ACCEPT
NW_020822370.1	31488624	36.09	3.22581	31	12.8205	39	0	19	3.22581	12.8205	ACCEPT	ACCEPT
NW_020822370.1	31852931	138.89	14.2857	35	29.1667	24	6.66667	15	7.61905	22.5	ACCEPT	ACCEPT
NW_020822370.1	31965832	284.07	75	12	90	10	50	6	25	40	ACCEPT	ACCEPT
NW_020822370.1	32225666	239.59	62.5	8	85.7143	7	28.5714	7	33.9286	57.1429	ACCEPT	ACCEPT
NW_020822370.1	32235880	51.55	10	20	12.1951	41	6.66667	15	3.33333	5.52846	ACCEPT	ACCEPT
NW_020822370.1	32320808	146.95	15.3846	13	19.2308	26	0	10	15.3846	19.2308	ACCEPT	ACCEPT
NW_020822370.1	32512444	1375.14	71.4286	28	91.4286	35	63.1579	19	8.27068	28.2707	ACCEPT	ACCEPT
NW_020822370.1	32717949	433.12	24.1379	29	44.1176	34	0	28	24.1379	44.1176	ACCEPT	ACCEPT
NW_020822370.1	32840896	40.1	5.26316	19	17.9487	39	0	26	5.26316	17.9487	ACCEPT	ACCEPT
NW_020822370.1	32883210	87.87	21.7391	23	26.6667	15	8.33333	12	13.4058	18.3333	ACCEPT	ACCEPT
NW_020822370.1	33008928	61.42	12.5	8	50	10	0	6	12.5	50	ACCEPT	ACCEPT
NW_020822370.1	33068173	128.53	14.2857	35	20	30	8.69565	23	5.59006	11.3043	ACCEPT	ACCEPT
NW_020822370.1	33089173	74.44	9.09091	11	26.6667	15	0	14	9.09091	26.6667	ACCEPT	ACCEPT
NW_020822370.1	33179107	164.29	20	10	50	18	9.09091	11	10.9091	40.9091	ACCEPT	ACCEPT
NW_020822370.1	33201866	75.17	19.0476	21	20	15	0	8	19.0476	20	ACCEPT	ACCEPT
NW_020822370.1	33364974	220.87	30	10	46.6667	15	14.2857	7	15.7143	32.381	ACCEPT	ACCEPT
NW_020822370.1	33951959	91.89	20	15	26.6667	15	0	6	20	26.6667	ACCEPT	ACCEPT
NW_020822370.1	34021442	129.3	9.67742	31	29.6296	27	6.66667	15	3.01075	22.963	ACCEPT	ACCEPT
NW_020822370.1	34058145	77.97	18.75	16	41.6667	12	0	7	18.75	41.6667	ACCEPT	ACCEPT
NW_020822370.1	34093639	349.88	29.1667	24	31.5789	38	7.14286	14	22.0238	24.4361	ACCEPT	ACCEPT
NW_020822370.1	34294544	69.89	16	25	18.5185	27	0	16	16	18.5185	ACCEPT	ACCEPT
NW_020822370.1	34353505	1913.09	92.8571	28	93.4783	46	75	20	17.8571	18.4783	ACCEPT	ACCEPT
NW_020822370.1	34498325	1123.93	85.7143	14	94.4444	18	83.3333	6	2.38095	11.1111	ACCEPT	ACCEPT
NW_020822370.1	35243154	60.87	10.3448	29	25.9259	27	0	10	10.3448	25.9259	ACCEPT	ACCEPT
NW_020822370.1	35453497	1652.76	93.3333	15	96.7742	31	87.5	24	5.83333	9.27419	ACCEPT	ACCEPT
NW_020822370.1	35965821	2361.12	97.4359	39	100	33	85	20	12.4359	15	ACCEPT	ACCEPT
NW_020822370.1	35969356	1456.09	94.7368	19	95.4545	22	77.7778	27	16.9591	17.6768	ACCEPT	ACCEPT
NW_020822370.1	36018484	527.36	80	15	88.8889	18	50	12	30	38.8889	ACCEPT	ACCEPT
NW_020822370.1	36157632	1409.52	84.6154	26	85.7143	21	83.871	31	0.744417	1.84332	ACCEPT	ACCEPT
NW_020822370.1	36303911	256.14	33.3333	15	47.8261	23	5.88235	17	27.451	41.9437	ACCEPT	ACCEPT
NW_020822370.1	36394986	1643.19	80.6452	31	89.4737	38	78.2609	23	2.38429	11.2128	ACCEPT	ACCEPT
NW_020822370.1	36483705	586.05	71.4286	14	90.9091	11	69.2308	13	2.1978	21.6783	ACCEPT	ACCEPT
NW_020822370.1	36504458	650.15	80	10	100	17	66.6667	9	13.3333	33.3333	ACCEPT	ACCEPT
NW_020822370.1	36543671	50.15	16.6667	12	21.4286	14	0	8	16.6667	21.4286	ACCEPT	ACCEPT
NW_020822370.1	36808398	2271.09	94.1176	34	97.0588	34	82.1429	28	11.9748	14.916	ACCEPT	ACCEPT
NW_020822370.1	36888715	1283.12	77.7778	27	93.75	32	71.4286	14	6.34921	22.3214	ACCEPT	ACCEPT
NW_020822370.1	36976840	2160.22	90.9091	33	100	33	84.8485	33	6.06061	15.1515	ACCEPT	ACCEPT
NW_020822370.1	37149606	1459.99	86.6667	30	100	27	85	20	1.66667	15	ACCEPT	ACCEPT
NW_020822370.1	37167850	1486.78	93.75	16	100	14	80	10	13.75	20	ACCEPT	ACCEPT
NW_020822370.1	37324610	66.46	9.09091	33	20.6897	29	7.69231	26	1.3986	12.9973	ACCEPT	ACCEPT
NW_020822370.1	37602916	1519.14	82.1429	28	87.8788	33	78.2609	23	3.88199	9.61792	ACCEPT	ACCEPT
NW_020822370.1	37650507	1744.19	75.7576	33	94.2857	35	75	20	0.757576	19.2857	ACCEPT	ACCEPT
NW_020822370.1	37707591	87.09	4.16667	24	17.1429	35	0	23	4.16667	17.1429	ACCEPT	ACCEPT
NW_020822370.1	37863638	547.89	75	8	100	8	50	6	25	50	ACCEPT	ACCEPT
NW_020822370.1	37878454	1058.13	83.3333	18	92.8571	28	70.5882	17	12.7451	22.2689	ACCEPT	ACCEPT
NW_020822370.1	37930038	546.92	90	10	100	8	85.7143	14	4.28571	14.2857	ACCEPT	ACCEPT
NW_020822370.1	38078789	68.89	13.7931	29	16.129	31	6.66667	15	7.12644	9.46237	ACCEPT	ACCEPT
NW_020822370.1	38104269	45.17	15.7895	19	30.7692	13	7.69231	13	8.09717	23.0769	ACCEPT	ACCEPT
NW_020822370.1	38140605	113.32	15	20	27.2727	22	0	6	15	27.2727	ACCEPT	ACCEPT
NW_020822370.1	38292157	1759.13	83.7838	37	100	22	83.3333	30	0.45045	16.6667	ACCEPT	ACCEPT
NW_020822370.1	38296245	3455.12	84.8485	33	100	53	80.9524	21	3.8961	19.0476	ACCEPT	ACCEPT
NW_020822370.1	38326534	94.44	7.69231	26	20.8333	24	5.55556	18	2.13675	15.2778	ACCEPT	ACCEPT
NW_020822370.1	38868214	114.15	10.5263	19	36.3636	11	0	8	10.5263	36.3636	ACCEPT	ACCEPT
NW_020822370.1	39104099	2199.53	95.6522	23	100	31	89.4737	19	6.17849	10.5263	ACCEPT	ACCEPT
NW_020822370.1	39108387	222.9	21.4286	28	26.4706	34	8.33333	12	13.0952	18.1373	ACCEPT	ACCEPT
NW_020822370.1	39268625	927.87	92.8571	14	93.75	16	62.5	8	30.3571	31.25	ACCEPT	ACCEPT
NW_020822370.1	39321675	966.29	93.3333	15	100	19	83.3333	6	10	16.6667	ACCEPT	ACCEPT
NW_020822370.1	39375629	419.14	66.6667	6	91.6667	12	62.5	8	4.16667	29.1667	ACCEPT	ACCEPT
NW_020822370.1	39412853	37.19	16.6667	24	27.2727	11	7.14286	14	9.52381	20.1299	ACCEPT	ACCEPT
NW_020822370.1	39425722	289.12	17.8571	28	21.1538	52	3.7037	27	14.1534	17.4501	ACCEPT	ACCEPT
NW_020822370.1	39516517	41.2	10	30	16.6667	18	0	18	10	16.6667	ACCEPT	ACCEPT
NW_020822370.1	39600563	1688.1	90.9091	33	96.4286	28	64.7059	34	26.2032	31.7227	ACCEPT	ACCEPT
NW_020822370.1	39636476	113.09	5.40541	37	27.7778	36	0	20	5.40541	27.7778	ACCEPT	ACCEPT
NW_020822370.1	39989816	183.13	16.6667	48	25	72	8.82353	34	7.84314	16.1765	ACCEPT	ACCEPT
NW_020822370.1	40048761	88.12	15.625	32	17.3913	46	0	41	15.625	17.3913	ACCEPT	ACCEPT
NW_020822370.1	40094539	62.93	17.6471	17	17.8571	28	14.2857	28	3.36134	3.57143	ACCEPT	ACCEPT
NW_020822370.1	40107141	912.76	86.6667	15	100	17	70	10	16.6667	30	ACCEPT	ACCEPT
NW_020822370.1	40343887	50.1	5.88235	17	23.5294	34	0	23	5.88235	23.5294	ACCEPT	ACCEPT
NW_020822372.1	351122	111.26	14.2857	21	27.907	43	6.89655	29	7.38916	21.0104	ACCEPT	ACCEPT
NW_020822372.1	416322	1105.84	83.3333	24	86.6667	30	61.7647	34	21.5686	24.902	ACCEPT	ACCEPT
NW_020822372.1	431127	2245.53	86.4865	37	91.6667	48	80.6452	31	5.84133	11.0215	ACCEPT	ACCEPT
NW_020822372.1	487623	71.95	16.6667	24	17.8571	28	5.26316	19	11.4035	12.594	ACCEPT	ACCEPT
NW_020822372.1	513180	2941.49	88.7097	62	94.3396	53	84	25	4.70968	10.3396	ACCEPT	ACCEPT
NW_020822372.1	662202	430.61	11.1111	63	27.7778	54	7.31707	41	3.79404	20.4607	ACCEPT	ACCEPT
NW_020822372.1	706357	1855.36	86.4865	37	96.875	32	79.1667	24	7.31982	17.7083	ACCEPT	ACCEPT
NW_020822372.1	741951	1810.13	89.6552	29	97.5	40	81.25	16	8.40517	16.25	ACCEPT	ACCEPT
NW_020822372.1	879261	929.59	75	8	90	10	72.7273	11	2.27273	17.2727	ACCEPT	ACCEPT
NW_020822372.1	903957	214.13	14.5833	48	18.75	64	7.14286	42	7.44048	11.6071	ACCEPT	ACCEPT
NW_020822372.1	914626	2509.09	93.8776	49	100	37	83.3333	24	10.5442	16.6667	ACCEPT	ACCEPT
NW_020822372.1	1051233	1045.23	88.8889	18	100	19	68.75	16	20.1389	31.25	ACCEPT	ACCEPT
NW_020822372.1	1064141	1218.16	92.8571	14	100	16	72.7273	11	20.1299	27.2727	ACCEPT	ACCEPT
NW_020822372.1	1086961	498.07	80	10	85.7143	14	55.5556	9	24.4444	30.1587	ACCEPT	ACCEPT
NW_020822372.1	1281820	2817.11	96.5517	29	100	57	85.7143	28	10.8374	14.2857	ACCEPT	ACCEPT
NW_020822372.1	1313615	2246.09	89.1892	37	96	50	66.6667	21	22.5225	29.3333	ACCEPT	ACCEPT
NW_020822372.1	1914288	635.08	87.5	8	88.8889	9	77.7778	9	9.72222	11.1111	ACCEPT	ACCEPT
NW_020822372.1	1916189	32.24	12.1951	41	15.7895	38	5.88235	17	6.31277	9.90712	ACCEPT	ACCEPT
NW_020822372.1	1925731	232.19	12.2807	57	31.7073	41	8.57143	35	3.70927	23.1359	ACCEPT	ACCEPT
NW_020822372.1	1938922	1596.35	92.3077	26	96.5517	29	84.6154	13	7.69231	11.9363	ACCEPT	ACCEPT
NW_020822372.1	1963258	1070.78	89.4737	19	100	15	83.3333	18	6.14035	16.6667	ACCEPT	ACCEPT
NW_020822372.1	2384237	137.87	13.6364	22	22.449	49	7.69231	13	5.94406	14.7567	ACCEPT	ACCEPT
NW_020822372.1	2585857	1743.91	88.4615	26	93.5484	31	81.8182	22	6.64336	11.7302	ACCEPT	ACCEPT
NW_020822372.1	2699483	1672.73	93.3333	15	100	22	75	12	18.3333	25	ACCEPT	ACCEPT
NW_020822372.1	2720900	241.13	26.3158	38	26.9231	26	5.26316	19	21.0526	21.6599	ACCEPT	ACCEPT
NW_020822372.1	2746659	626.33	77.7778	9	100	8	50	8	27.7778	50	ACCEPT	ACCEPT
NW_020822372.1	2766317	1950.13	86.0465	43	94.1176	34	80.9524	21	5.09413	13.1653	ACCEPT	ACCEPT
NW_020822372.1	2988595	1245.41	88.2353	17	100	18	75	8	13.2353	25	ACCEPT	ACCEPT
NW_020822372.1	3050496	2834.13	91.1765	34	100	52	83.3333	30	7.84314	16.6667	ACCEPT	ACCEPT
NW_020822372.1	3086960	42.23	25	8	37.5	8	0	6	25	37.5	ACCEPT	ACCEPT
NW_020822372.1	3156703	715.88	57.8947	19	90.625	32	50	16	7.89474	40.625	ACCEPT	ACCEPT
NW_020822372.1	3298287	1996.12	84.6154	26	100	38	82.3529	17	2.26244	17.6471	ACCEPT	ACCEPT
NW_020822372.1	3473960	1226.73	93.75	16	100	22	83.3333	12	10.4167	16.6667	ACCEPT	ACCEPT
NW_020822372.1	4664144	131.28	45.4545	11	60	10	0	7	45.4545	60	ACCEPT	ACCEPT
NW_020822372.1	4678903	81.13	4.16667	24	32	25	0	15	4.16667	32	ACCEPT	ACCEPT
NW_020822372.1	4786918	823.91	83.3333	12	100	18	63.6364	11	19.697	36.3636	ACCEPT	ACCEPT
NW_020822372.1	5021255	497.17	88.8889	9	100	9	66.6667	6	22.2222	33.3333	ACCEPT	ACCEPT
NW_020822373.1	168	422.12	26.6667	15	53.8462	26	4	25	22.6667	49.8462	ACCEPT	ACCEPT
NW_020822373.1	95479	777.05	68.75	16	90	20	64.7059	17	4.04412	25.2941	ACCEPT	ACCEPT
NW_020822373.1	98059	129.1	5	20	41.1765	17	0	12	5	41.1765	ACCEPT	ACCEPT
NW_020822373.1	269292	89.83	16.6667	18	43.75	16	9.09091	11	7.57576	34.6591	ACCEPT	ACCEPT
NW_020822373.1	696101	51.09	3.7037	27	25	20	0	12	3.7037	25	ACCEPT	ACCEPT
NW_020822373.1	827278	244.25	20.6897	29	33.3333	24	6.66667	15	14.023	26.6667	ACCEPT	ACCEPT
NW_020822373.1	962107	126.88	21.7391	23	25	16	0	17	21.7391	25	ACCEPT	ACCEPT
NW_020822373.1	1146146	799.13	58.8235	17	94.4444	18	50	24	8.82353	44.4444	ACCEPT	ACCEPT
NW_020822373.1	1173900	50.15	15	20	20.8333	24	0	12	15	20.8333	ACCEPT	ACCEPT
NW_020822373.1	1249743	169.17	28.5714	14	54.5455	11	0	7	28.5714	54.5455	ACCEPT	ACCEPT
NW_020822373.1	1384451	649.12	75	16	100	13	60	10	15	40	ACCEPT	ACCEPT
NW_020822373.1	1808487	46.57	8.33333	12	23.0769	13	7.69231	13	0.641026	15.3846	ACCEPT	ACCEPT
NW_020822373.1	2222550	658.12	63.6364	11	100	15	50	10	13.6364	50	ACCEPT	ACCEPT
NW_020822373.1	2362092	596.97	78.5714	14	85.7143	21	38.4615	13	40.1099	47.2527	ACCEPT	ACCEPT
NW_020822373.1	2447607	43.58	7.69231	13	31.8182	22	0	24	7.69231	31.8182	ACCEPT	ACCEPT
NW_020822373.1	2568881	50.13	26.087	23	37.5	8	0	11	26.087	37.5	ACCEPT	ACCEPT
NW_020822373.1	2600369	97.89	21.0526	19	44.4444	9	0	9	21.0526	44.4444	ACCEPT	ACCEPT
NW_020822373.1	2616696	415.17	56.25	16	100	7	30.7692	13	25.4808	69.2308	ACCEPT	ACCEPT
NW_020822373.1	2750183	54.1	4.7619	21	36.8421	19	0	9	4.7619	36.8421	ACCEPT	ACCEPT
NW_020822373.1	2933986	838.15	80	20	89.4737	19	72.7273	11	7.27273	16.7464	ACCEPT	ACCEPT
NW_020822373.1	3074605	116.88	21.4286	14	29.4118	17	0	6	21.4286	29.4118	ACCEPT	ACCEPT
NW_020822373.1	3274550	91.13	5	20	38.4615	13	0	8	5	38.4615	ACCEPT	ACCEPT
NW_020822373.1	3429583	58.07	9.09091	11	25	24	0	20	9.09091	25	ACCEPT	ACCEPT
NW_020822373.1	3459261	67.23	21.4286	14	26.087	23	10	10	11.4286	16.087	ACCEPT	ACCEPT
NW_020822373.1	3636398	75.37	14.2857	21	22.2222	27	7.69231	13	6.59341	14.5299	ACCEPT	ACCEPT
NW_020822373.1	3646314	33.17	13.0435	23	21.0526	19	7.69231	13	5.35117	13.3603	ACCEPT	ACCEPT
NW_020822373.1	3646597	61.01	23.5294	17	35.7143	14	16.6667	18	6.86275	19.0476	ACCEPT	ACCEPT
NW_020822373.1	3860145	151.62	6.45161	31	40.7407	27	0	14	6.45161	40.7407	ACCEPT	ACCEPT
NW_020822373.1	3964084	77.91	19.0476	21	22.2222	9	0	13	19.0476	22.2222	ACCEPT	ACCEPT
NW_020822373.1	3983098	588.28	59.0909	22	92.3077	13	58.8235	17	0.26738	33.4842	ACCEPT	ACCEPT
NW_020822373.1	4180054	153.05	35.7143	14	57.1429	7	8.33333	12	27.381	48.8095	ACCEPT	ACCEPT
NW_020822373.1	4470340	59.13	5.55556	18	28.5714	14	0	20	5.55556	28.5714	ACCEPT	ACCEPT
NW_020822373.1	4476179	118.38	22.2222	18	36.3636	22	7.69231	13	14.5299	28.6713	ACCEPT	ACCEPT
NW_020822373.1	4518237	73.09	6.97674	43	19.6078	51	2.94118	34	4.03557	16.6667	ACCEPT	ACCEPT
NW_020822373.1	4520712	319.12	10.3448	116	12.4031	129	4.58716	109	5.75767	7.81594	ACCEPT	ACCEPT
NW_020822374.1	16925	1373.13	88.2353	17	100	15	70	10	18.2353	30	ACCEPT	ACCEPT
NW_020822374.1	127630	40.65	13.5135	37	20	35	0	19	13.5135	20	ACCEPT	ACCEPT
NW_020822374.1	166157	39.24	11.1111	9	35.2941	17	7.69231	13	3.4188	27.6018	ACCEPT	ACCEPT
NW_020822374.1	286081	61.17	14.2857	7	37.5	8	0	7	14.2857	37.5	ACCEPT	ACCEPT
NW_020822374.1	328710	104.05	26.6667	15	50	14	10	10	16.6667	40	ACCEPT	ACCEPT
NW_020822374.1	398450	74.22	25	24	26.9231	26	9.52381	21	15.4762	17.3993	ACCEPT	ACCEPT
NW_020822374.1	1077774	52.19	33.3333	6	57.1429	7	0	7	33.3333	57.1429	ACCEPT	ACCEPT
NW_020822374.1	1126269	78.9	15.3846	13	25	24	9.09091	11	6.29371	15.9091	ACCEPT	ACCEPT
NW_020822374.1	1302240	36.09	5.40541	37	19.3548	31	0	20	5.40541	19.3548	ACCEPT	ACCEPT
NW_020822374.1	1401348	642.87	80	20	91.6667	12	66.6667	9	13.3333	25	ACCEPT	ACCEPT
NW_020822374.1	1699979	145.13	20	10	33.3333	15	0	10	20	33.3333	ACCEPT	ACCEPT
NW_020822374.1	1917574	672.56	83.3333	6	100	13	81.8182	11	1.51515	18.1818	ACCEPT	ACCEPT
NW_020822374.1	1924433	857.24	86.6667	15	91.6667	24	8.33333	12	78.3333	83.3333	ACCEPT	ACCEPT
NW_020822374.1	2006743	893.12	78.2609	23	100	14	62.5	16	15.7609	37.5	ACCEPT	ACCEPT
NW_020822374.1	2104485	97.18	20	15	30	20	5.88235	17	14.1176	24.1176	ACCEPT	ACCEPT
NW_020822374.1	2121959	49.67	7.69231	13	33.3333	12	0	6	7.69231	33.3333	ACCEPT	ACCEPT
NW_020822374.1	2137874	87.43	12.5	8	30.7692	13	0	6	12.5	30.7692	ACCEPT	ACCEPT
NW_020822374.1	2186270	2269.13	55	20	94.5946	37	50	20	5	44.5946	ACCEPT	ACCEPT
NW_020822374.1	2608403	770.25	59.0909	22	93.3333	15	38.8889	18	20.202	54.4444	ACCEPT	ACCEPT
NW_020822374.1	2763693	92.15	25	8	30	10	0	8	25	30	ACCEPT	ACCEPT
NW_020822374.1	2847650	512.01	47.0588	17	61.1111	18	8.33333	12	38.7255	52.7778	ACCEPT	ACCEPT
NW_020822374.1	2947068	49.33	14.2857	7	50	8	0	8	14.2857	50	ACCEPT	ACCEPT
NW_020822374.1	3030218	1125.51	66.6667	24	91.3043	23	55.5556	18	11.1111	35.7488	ACCEPT	ACCEPT
NW_020822374.1	3937347	189.23	28.5714	14	54.5455	11	0	7	28.5714	54.5455	ACCEPT	ACCEPT
NW_020822374.1	4091049	97.52	22.2222	9	50	12	0	9	22.2222	50	ACCEPT	ACCEPT
NW_020822374.1	4194770	241.13	28.5714	7	55	20	0	15	28.5714	55	ACCEPT	ACCEPT
NW_020822374.1	4384226	52.18	12.5	8	33.3333	6	0	9	12.5	33.3333	ACCEPT	ACCEPT
NW_020822375.1	428680	443.19	40	20	46.1538	26	5.88235	17	34.1176	40.2715	ACCEPT	ACCEPT
NW_020822375.1	505835	1276.5	90.9091	11	94.7368	19	76.4706	17	14.4385	18.2663	ACCEPT	ACCEPT
NW_020822375.1	750370	1197.09	95.2381	21	100	20	60	10	35.2381	40	ACCEPT	ACCEPT
NW_020822375.1	1340414	78.11	5	20	28.5714	21	0	12	5	28.5714	ACCEPT	ACCEPT
NW_020822375.1	1469239	35.24	11.1111	18	20.8333	24	0	16	11.1111	20.8333	ACCEPT	ACCEPT
NW_020822375.1	1545950	242.26	25	28	38.0952	21	9.67742	31	15.3226	28.4178	ACCEPT	ACCEPT
NW_020822375.1	3219156	53.17	25	8	50	6	10	10	15	40	ACCEPT	ACCEPT
NW_020822375.1	3342948	55.26	23.5294	17	27.2727	11	9.09091	11	14.4385	18.1818	ACCEPT	ACCEPT
NW_020822375.1	3846263	569.19	71.4286	14	90	10	50	26	21.4286	40	ACCEPT	ACCEPT
NW_020822375.1	4043411	2648.1	96.6667	30	100	38	84.6154	13	12.0513	15.3846	ACCEPT	ACCEPT
NW_020822375.1	4121435	329.96	83.3333	6	88.8889	9	50	6	33.3333	38.8889	ACCEPT	ACCEPT
NW_020822375.1	4251893	46.89	7.14286	28	31.8182	22	0	15	7.14286	31.8182	ACCEPT	ACCEPT
NW_020822375.1	4404980	80.21	15.3846	26	30.4348	23	12.5	16	2.88462	17.9348	ACCEPT	ACCEPT
NW_020822375.1	4653281	1023.88	84.6154	13	100	16	63.6364	11	20.979	36.3636	ACCEPT	ACCEPT
NW_020822375.1	4710224	551.26	92.3077	13	100	7	75	8	17.3077	25	ACCEPT	ACCEPT
NW_020822375.1	4777626	911.16	83.3333	12	100	14	75	12	8.33333	25	ACCEPT	ACCEPT
NW_020822375.1	5293125	1116.15	85.1852	27	100	14	80	15	5.18519	20	ACCEPT	ACCEPT
NW_020822375.1	5454747	332.53	10.7143	28	32.6531	49	5.88235	34	4.83193	26.7707	ACCEPT	ACCEPT
NW_020822375.1	5522381	1479.84	96.5517	29	100	16	86.6667	15	9.88506	13.3333	ACCEPT	ACCEPT
NW_020822375.1	5543381	801.5	87.5	16	100	8	83.3333	12	4.16667	16.6667	ACCEPT	ACCEPT
NW_020822375.1	5641246	584.41	69.2308	26	84.2105	19	66.6667	9	2.5641	17.5439	ACCEPT	ACCEPT
NW_020822375.1	5878112	1101.55	90.625	32	100	14	87.5	8	3.125	12.5	ACCEPT	ACCEPT
NW_020822375.1	6310247	952.14	88.8889	9	94.4444	18	77.7778	9	11.1111	16.6667	ACCEPT	ACCEPT
NW_020822375.1	6318313	2060.2	85.3659	41	91.6667	36	76.6667	30	8.69919	15	ACCEPT	ACCEPT
NW_020822375.1	6370570	2621.62	93.3333	30	94.1176	34	87.5	24	5.83333	6.61765	ACCEPT	ACCEPT
NW_020822375.1	7010808	58.97	13.0435	23	17.5	40	9.09091	22	3.95257	8.40909	ACCEPT	ACCEPT
NW_020822375.1	7243577	2356.09	95.8333	24	100	42	82.6087	23	13.2246	17.3913	ACCEPT	ACCEPT
NW_020822375.1	7629219	101.56	16.6667	24	24	25	10	20	6.66667	14	ACCEPT	ACCEPT
NW_020822375.1	7825502	31.09	5.88235	17	17.1429	35	0	18	5.88235	17.1429	ACCEPT	ACCEPT
NW_020822375.1	7931750	384.17	30	30	32.1429	28	7.14286	28	22.8571	25	ACCEPT	ACCEPT
NW_020822375.1	7992343	2829.56	92.3077	39	100	23	86.9565	23	5.35117	13.0435	ACCEPT	ACCEPT
NW_020822375.1	8197880	1027.64	66.6667	27	88	25	50	22	16.6667	38	ACCEPT	ACCEPT
NW_020822375.1	8455348	1214.12	71.4286	21	100	27	66.6667	12	4.7619	33.3333	ACCEPT	ACCEPT
NW_020822375.1	8597616	1988.78	94.7368	19	96.9697	33	87.8788	33	6.85805	9.09091	ACCEPT	ACCEPT
NW_020822375.1	8717175	2412.1	94.2857	35	100	43	83.3333	18	10.9524	16.6667	ACCEPT	ACCEPT
NW_020822375.1	8732219	1561.23	87.5	16	100	23	80	20	7.5	20	ACCEPT	ACCEPT
NW_020822375.1	9120094	207.51	16.6667	18	41.1765	17	10	20	6.66667	31.1765	ACCEPT	ACCEPT
NW_020822375.1	9410249	75.13	16.6667	18	26.3158	19	7.14286	28	9.52381	19.1729	ACCEPT	ACCEPT
NW_020822375.1	9429772	89.32	16.6667	6	40	10	0	9	16.6667	40	ACCEPT	ACCEPT
NW_020822375.1	9574741	1438.87	79.1667	24	89.4737	38	75	16	4.16667	14.4737	ACCEPT	ACCEPT
NW_020822375.1	9689814	1248.5	90	20	96.4286	28	86.6667	15	3.33333	9.7619	ACCEPT	ACCEPT
NW_020822375.1	9958609	936.86	71.4286	14	90.9091	11	54.5455	11	16.8831	36.3636	ACCEPT	ACCEPT
NW_020822375.1	10254791	134.88	12.5	8	26.6667	15	7.69231	13	4.80769	18.9744	ACCEPT	ACCEPT
NW_020822375.1	10339647	730.64	90	10	100	8	86.6667	15	3.33333	13.3333	ACCEPT	ACCEPT
NW_020822375.1	10452415	743.72	83.3333	6	100	13	66.6667	9	16.6667	33.3333	ACCEPT	ACCEPT
NW_020822375.1	10455197	159.63	11.7647	17	30	30	0	6	11.7647	30	ACCEPT	ACCEPT
NW_020822375.1	10905839	743.17	81.25	16	100	7	80	10	1.25	20	ACCEPT	ACCEPT
NW_020822375.1	11721430	1129.53	89.4737	19	94.7368	19	87.5	8	1.97368	7.23684	ACCEPT	ACCEPT
NW_020822375.1	12367102	666.44	90	10	100	6	88.8889	9	1.11111	11.1111	ACCEPT	ACCEPT
NW_020822375.1	12456447	1827.02	90.3226	31	100	29	88.2353	17	2.08729	11.7647	ACCEPT	ACCEPT
NW_020822375.1	12463946	1033.19	71.4286	14	92.3077	26	58.8235	17	12.605	33.4842	ACCEPT	ACCEPT
NW_020822375.1	12547074	46.13	6.89655	29	15	40	3.0303	33	3.86625	11.9697	ACCEPT	ACCEPT
NW_020822375.1	12570486	1665.33	86.3636	22	100	26	81.8182	33	4.54545	18.1818	ACCEPT	ACCEPT
NW_020822375.1	12676845	102.09	2.08333	48	29.0323	31	0	15	2.08333	29.0323	ACCEPT	ACCEPT
NW_020822375.1	12739997	560.09	87.5	8	92.8571	14	57.1429	7	30.3571	35.7143	ACCEPT	ACCEPT
NW_020822375.1	12769234	58.09	8.51064	47	26.087	23	4.16667	24	4.34397	21.9203	ACCEPT	ACCEPT
NW_020822375.1	13048320	1399.12	78.125	32	90.3226	31	40.9091	22	37.2159	49.4135	ACCEPT	ACCEPT
NW_020822375.1	13053578	1235.09	89.4737	19	90.4762	21	83.3333	18	6.14035	7.14286	ACCEPT	ACCEPT
NW_020822375.1	13133275	749.31	91.6667	12	100	13	85.7143	7	5.95238	14.2857	ACCEPT	ACCEPT
NW_020822375.1	13230124	1574.82	89.1892	37	93.3333	15	85.7143	21	3.4749	7.61905	ACCEPT	ACCEPT
NW_020822375.1	13313294	1051.02	94.4444	18	100	16	84.6154	13	9.82906	15.3846	ACCEPT	ACCEPT
NW_020822375.1	13664055	161.53	12.5	8	38.8889	18	6.25	16	6.25	32.6389	ACCEPT	ACCEPT
NW_020822375.1	13702252	166.28	18.1818	33	28.5714	35	4.34783	23	13.834	24.2236	ACCEPT	ACCEPT
NW_020822375.1	13711476	2364.5	96.6667	30	100	29	90.9091	11	5.75758	9.09091	ACCEPT	ACCEPT
NW_020822375.1	13845641	1194.1	95.2381	21	100	18	77.7778	9	17.4603	22.2222	ACCEPT	ACCEPT
NW_020822375.1	14163768	1358.66	86.2069	29	96	25	81.25	16	4.9569	14.75	ACCEPT	ACCEPT
NW_020822375.1	14283749	1271.56	90	20	100	15	78.9474	19	11.0526	21.0526	ACCEPT	ACCEPT
NW_020822375.1	14335208	660.06	90	10	91.6667	12	85.7143	14	4.28571	5.95238	ACCEPT	ACCEPT
NW_020822375.1	14612993	970.39	73.6842	19	92.8571	28	46.1538	13	27.5304	46.7033	ACCEPT	ACCEPT
NW_020822375.1	14648227	1627.13	95.2381	21	100	23	88.2353	17	7.0028	11.7647	ACCEPT	ACCEPT
NW_020822375.1	14926870	2475.84	97.2973	37	100	41	86.6667	15	10.6306	13.3333	ACCEPT	ACCEPT
NW_020822375.1	14950320	53.26	9.52381	42	25.7143	35	0	28	9.52381	25.7143	ACCEPT	ACCEPT
NW_020822375.1	15143020	1148.13	90	10	96.2963	27	82.3529	17	7.64706	13.9434	ACCEPT	ACCEPT
NW_020822375.1	15412631	380.13	36	25	36.8421	38	0	11	36	36.8421	ACCEPT	ACCEPT
NW_020822375.1	15429468	160.88	15.7895	19	31.5789	19	6.66667	15	9.12281	24.9123	ACCEPT	ACCEPT
NW_020822375.1	15449617	527.56	88.8889	9	100	10	69.2308	13	19.6581	30.7692	ACCEPT	ACCEPT
NW_020822375.1	15786652	861.46	85.7143	7	95.8333	24	83.3333	6	2.38095	12.5	ACCEPT	ACCEPT
NW_020822375.1	16469538	541.41	90	10	90.9091	11	30	10	60	60.9091	ACCEPT	ACCEPT
NW_020822375.1	16893727	1971.1	94.7368	19	100	27	83.3333	36	11.4035	16.6667	ACCEPT	ACCEPT
NW_020822375.1	16971550	763.1	84.2105	19	100	12	50	10	34.2105	50	ACCEPT	ACCEPT
NW_020822375.1	17139377	1095.6	83.3333	12	96.4286	28	81.25	16	2.08333	15.1786	ACCEPT	ACCEPT
NW_020822375.1	17427245	2013.09	96.7742	31	100	15	84.6154	13	12.1588	15.3846	ACCEPT	ACCEPT
NW_020822375.1	17705773	239.88	13.6364	22	35	20	0	22	13.6364	35	ACCEPT	ACCEPT
NW_020822375.1	17984519	889.43	90	10	100	9	77.7778	9	12.2222	22.2222	ACCEPT	ACCEPT
NW_020822375.1	18032653	1325.57	87.5	16	96	25	62.5	8	25	33.5	ACCEPT	ACCEPT
NW_020822375.1	18096325	1373.74	92.3077	13	93.1034	29	83.3333	24	8.97436	9.77011	ACCEPT	ACCEPT
NW_020822375.1	18659925	1198.15	91.6667	12	100	14	64.2857	14	27.381	35.7143	ACCEPT	ACCEPT
NW_020822375.1	18881955	281.49	58.3333	12	77.7778	9	0	7	58.3333	77.7778	ACCEPT	ACCEPT
NW_020822375.1	19043601	1532.2	91.6667	24	100	29	70	10	21.6667	30	ACCEPT	ACCEPT
NW_020822375.1	19072912	51.61	27.2727	11	28.5714	14	12.5	8	14.7727	16.0714	ACCEPT	ACCEPT
NW_020822375.1	19237184	1263.02	90	20	91.6667	24	82.3529	17	7.64706	9.31373	ACCEPT	ACCEPT
NW_020822375.1	19362546	251.73	28	25	30.4348	23	8.33333	24	19.6667	22.1014	ACCEPT	ACCEPT
NW_020822375.1	19581620	1013.99	90	20	92.3077	13	60	10	30	32.3077	ACCEPT	ACCEPT
NW_020822375.1	19714710	1582.15	92	25	92.5926	27	76.1905	21	15.8095	16.4021	ACCEPT	ACCEPT
NW_020822375.1	19887103	1209.04	89.4737	19	91.3043	23	86.9565	23	2.51716	4.34783	ACCEPT	ACCEPT
NW_020822375.1	19949504	1336.1	85.7143	21	100	28	78.5714	14	7.14286	21.4286	ACCEPT	ACCEPT
NW_020822375.1	19996396	890.22	85.7143	14	90.4762	21	76.4706	17	9.2437	14.0056	ACCEPT	ACCEPT
NW_020822375.1	20170035	989.16	80	15	95.4545	22	77.7778	9	2.22222	17.6768	ACCEPT	ACCEPT
NW_020822375.1	20256449	263.96	57.1429	7	100	6	50	10	7.14286	50	ACCEPT	ACCEPT
NW_020822375.1	20312567	817.42	93.3333	15	100	7	92.3077	13	1.02564	7.69231	ACCEPT	ACCEPT
NW_020822375.1	20717997	1809.73	90	20	97.4359	39	88	25	2	9.4359	ACCEPT	ACCEPT
NW_020822375.1	20804245	34.16	3.7037	27	22.2222	27	0	16	3.7037	22.2222	ACCEPT	ACCEPT
NW_020822375.1	21025346	747.12	87.5	16	100	10	75	20	12.5	25	ACCEPT	ACCEPT
NW_020822375.1	21104575	2022.49	94.4444	18	100	39	85.1852	27	9.25926	14.8148	ACCEPT	ACCEPT
NW_020822375.1	21155739	196.13	25	24	37.931	29	4	25	21	33.931	ACCEPT	ACCEPT
NW_020822375.1	21199052	2003.13	94.4444	36	100	30	82.3529	17	12.0915	17.6471	ACCEPT	ACCEPT
NW_020822375.1	21205009	885.53	87.5	16	100	18	83.3333	6	4.16667	16.6667	ACCEPT	ACCEPT
NW_020822375.1	21299709	643.88	87.5	8	100	13	77.7778	9	9.72222	22.2222	ACCEPT	ACCEPT
NW_020822375.1	21736546	508.15	60	10	94.1176	17	22.2222	9	37.7778	71.8954	ACCEPT	ACCEPT
NW_020822375.1	21780599	137.9	14.2857	28	21.6216	37	0	10	14.2857	21.6216	ACCEPT	ACCEPT
NW_020822375.1	21916084	109.12	14.2857	21	17.6471	34	0	26	14.2857	17.6471	ACCEPT	ACCEPT
NW_020822375.1	21925340	943.68	87.5	8	100	17	83.3333	6	4.16667	16.6667	ACCEPT	ACCEPT
NW_020822375.1	22047833	2052.19	86.3636	22	96.9697	33	82.5	40	3.86364	14.4697	ACCEPT	ACCEPT
NW_020822375.1	22091869	2074.11	88.8889	36	93.3333	45	82.3529	17	6.53595	10.9804	ACCEPT	ACCEPT
NW_020822375.1	22111898	79.26	6.66667	30	25.8065	31	0	23	6.66667	25.8065	ACCEPT	ACCEPT
NW_020822375.1	22162451	926.73	66.6667	18	90.4762	21	63.1579	19	3.50877	27.3183	ACCEPT	ACCEPT
NW_020822375.1	22166467	1524.11	94.1176	17	97.1429	35	78.5714	14	15.5462	18.5714	ACCEPT	ACCEPT
NW_020822375.1	22185076	935.15	80.9524	21	95.4545	22	75	12	5.95238	20.4545	ACCEPT	ACCEPT
NW_020822375.1	22217232	1019.49	88.4615	26	88.8889	18	69.2308	13	19.2308	19.6581	ACCEPT	ACCEPT
NW_020822375.1	22576892	1577.09	96.5517	29	100	12	84	25	12.5517	16	ACCEPT	ACCEPT
NW_020822375.1	22623530	1616.09	95.6522	23	100	22	81.8182	22	13.834	18.1818	ACCEPT	ACCEPT
NW_020822375.1	22777530	565.74	88.2353	17	88.8889	18	83.3333	6	4.90196	5.55556	ACCEPT	ACCEPT
NW_020822375.1	22815346	53.07	8.69565	23	22.7273	22	0	23	8.69565	22.7273	ACCEPT	ACCEPT
NW_020822375.1	22824817	97.13	13.6364	22	20.6897	29	3.84615	26	9.79021	16.8435	ACCEPT	ACCEPT
NW_020822375.1	22899045	80.53	18.75	16	26.087	23	11.1111	18	7.63889	14.9758	ACCEPT	ACCEPT
NW_020822375.1	22916429	140.17	15.3846	26	32.3529	34	5.88235	17	9.50226	26.4706	ACCEPT	ACCEPT
NW_020822375.1	23343095	1064.7	88.8889	18	92.5926	27	83.3333	12	5.55556	9.25926	ACCEPT	ACCEPT
NW_020822375.1	23660715	1702.08	85.7143	42	86.9565	23	77.7778	27	7.93651	9.17874	ACCEPT	ACCEPT
NW_020822375.1	24134217	2040.53	94.2857	35	94.7368	38	84.2105	19	10.0752	10.5263	ACCEPT	ACCEPT
NW_020822375.1	24282080	1005.16	80	10	96.1538	26	71.4286	14	8.57143	24.7253	ACCEPT	ACCEPT
NW_020822375.1	24391224	241.17	41.6667	12	70	10	0	7	41.6667	70	ACCEPT	ACCEPT
NW_020822375.1	24401766	187.81	44.4444	9	100	7	40	10	4.44444	60	ACCEPT	ACCEPT
NW_020822375.1	24466055	975.11	88.8889	9	91.3043	23	81.25	16	7.63889	10.0543	ACCEPT	ACCEPT
NW_020822375.1	24676978	1690.09	96.1538	26	100	26	81.25	16	14.9038	18.75	ACCEPT	ACCEPT
NW_020822375.1	24694666	487.15	31.4286	35	45.1613	31	0	8	31.4286	45.1613	ACCEPT	ACCEPT
NW_020822375.1	24815236	72.95	14.2857	28	26.3158	38	4.7619	21	9.52381	21.5539	ACCEPT	ACCEPT
NW_020822375.1	24965234	541.57	73.3333	15	82.3529	17	50	6	23.3333	32.3529	ACCEPT	ACCEPT
NW_020822375.1	25062132	97.89	14.2857	14	26.3158	19	9.09091	11	5.19481	17.2249	ACCEPT	ACCEPT
NW_020822375.1	25159448	1135.25	92.8571	14	94.4444	18	84.2105	19	8.64662	10.2339	ACCEPT	ACCEPT
NW_020822375.1	25210793	1639.17	91.1765	34	100	9	85.7143	14	5.46218	14.2857	ACCEPT	ACCEPT
NW_020822375.1	25446905	310.17	26.6667	30	34.6154	26	5.88235	17	20.7843	28.733	ACCEPT	ACCEPT
NW_020822375.1	25604110	828.08	90.9091	11	94.4444	18	70	10	20.9091	24.4444	ACCEPT	ACCEPT
NW_020822375.1	26084128	1386.58	95	20	96.5517	29	83.3333	12	11.6667	13.2184	ACCEPT	ACCEPT
NW_020822375.1	26119810	1779.23	86.6667	30	100	32	81.25	16	5.41667	18.75	ACCEPT	ACCEPT
NW_020822375.1	26634009	1415.12	70.8333	24	96	25	65.2174	23	5.61594	30.7826	ACCEPT	ACCEPT
NW_020822375.1	26772754	38.09	6.89655	29	22.2222	27	0	18	6.89655	22.2222	ACCEPT	ACCEPT
NW_020822375.1	26900822	162.73	31.5789	19	35.2941	17	8.33333	12	23.2456	26.9608	ACCEPT	ACCEPT
NW_020822375.1	27841208	83.76	13.3333	15	24.2424	33	5.55556	18	7.77778	18.6869	ACCEPT	ACCEPT
NW_020822375.1	28130628	387.44	64.2857	14	90.9091	11	50	6	14.2857	40.9091	ACCEPT	ACCEPT
NW_020822375.1	28722316	1575.65	92.8571	28	94.1176	17	50	12	42.8571	44.1176	ACCEPT	ACCEPT
NW_020822375.1	28829521	45.12	10.7143	28	11.4286	35	0	15	10.7143	11.4286	ACCEPT	ACCEPT
NW_020822375.1	29066982	230.53	20.8333	24	29.7297	37	10.5263	19	10.307	19.2034	ACCEPT	ACCEPT
NW_020822375.1	29301912	145.73	11.1111	9	70	10	0	6	11.1111	70	ACCEPT	ACCEPT
NW_020822375.1	29697830	1741.38	96.7742	31	100	23	86.6667	15	10.1075	13.3333	ACCEPT	ACCEPT
NW_020822375.1	30006196	613.18	81.8182	11	100	9	75	12	6.81818	25	ACCEPT	ACCEPT
NW_020822375.1	30058927	1878.09	93.9394	33	96.2963	27	76.9231	26	17.0163	19.3732	ACCEPT	ACCEPT
NW_020822375.1	30415381	67.14	8.33333	36	12.1212	33	4	25	4.33333	8.12121	ACCEPT	ACCEPT
NW_020822375.1	30490697	709.56	76.1905	21	80	10	65	20	11.1905	15	ACCEPT	ACCEPT
NW_020822375.1	30552713	32.13	14.7059	34	16.129	31	4	25	10.7059	12.129	ACCEPT	ACCEPT
NW_020822375.1	31183346	80.12	17.3913	23	19.0476	42	3.84615	26	13.5452	15.2015	ACCEPT	ACCEPT
NW_020822375.1	31252358	59.12	15.3846	26	16.6667	36	0	15	15.3846	16.6667	ACCEPT	ACCEPT
NW_020822375.1	31394584	61.09	4	25	25	24	0	17	4	25	ACCEPT	ACCEPT
NW_020822375.1	32591363	1184.15	85	20	92.8571	28	76.9231	13	8.07692	15.9341	ACCEPT	ACCEPT
NW_020822375.1	32705729	40.15	18.1818	11	33.3333	9	0	12	18.1818	33.3333	ACCEPT	ACCEPT
NW_020822375.1	32837787	1767.09	96	25	100	25	82.3529	17	13.6471	17.6471	ACCEPT	ACCEPT
NW_020822375.1	32843355	1974.29	90	20	95.9184	49	80	15	10	15.9184	ACCEPT	ACCEPT
NW_020822375.1	33354177	109.1	5.26316	19	25.7143	35	0	22	5.26316	25.7143	ACCEPT	ACCEPT
NW_020822375.1	33595269	646.95	87.5	8	100	14	85.7143	7	1.78571	14.2857	ACCEPT	ACCEPT
NW_020822375.1	33622475	39.15	6.66667	15	37.5	8	0	19	6.66667	37.5	ACCEPT	ACCEPT
NW_020822375.1	33626800	1930.1	91.6667	24	100	25	88.2353	34	3.43137	11.7647	ACCEPT	ACCEPT
NW_020822375.1	33629169	798.63	85	20	90	20	60	10	25	30	ACCEPT	ACCEPT
NW_020822375.1	34064637	53.23	15.3846	13	33.3333	12	0	13	15.3846	33.3333	ACCEPT	ACCEPT
NW_020822375.1	35400558	1721.89	90.9091	33	96.1538	26	87.5	16	3.40909	8.65385	ACCEPT	ACCEPT
NW_020822375.1	35543088	258.16	64.2857	14	100	8	57.1429	7	7.14286	42.8571	ACCEPT	ACCEPT
NW_020822375.1	35681842	54.65	11.5385	26	19.5122	41	2.85714	35	8.68132	16.6551	ACCEPT	ACCEPT
NW_020822375.1	35720099	824.13	68.75	16	85.7143	21	66.6667	9	2.08333	19.0476	ACCEPT	ACCEPT
NW_020822375.1	35986182	35.53	33.3333	9	35.2941	17	14.2857	7	19.0476	21.0084	ACCEPT	ACCEPT
NW_020822375.1	36004986	415.16	63.6364	11	88.8889	9	54.5455	11	9.09091	34.3434	ACCEPT	ACCEPT
NW_020822375.1	36079845	636.19	81.8182	11	100	13	70	10	11.8182	30	ACCEPT	ACCEPT
NW_020822375.1	36300445	991.36	88	25	92.3077	13	75	12	13	17.3077	ACCEPT	ACCEPT
NW_020822375.1	36352734	157.9	14.2857	7	44	25	0	8	14.2857	44	ACCEPT	ACCEPT
NW_020822375.1	36402561	573.69	86.6667	15	91.6667	12	56.25	16	30.4167	35.4167	ACCEPT	ACCEPT
NW_020822376.1	143104	1015.57	90.9091	22	95.2381	21	83.3333	12	7.57576	11.9048	ACCEPT	ACCEPT
NW_020822376.1	214718	1193.78	94.1176	17	100	17	86.6667	15	7.45098	13.3333	ACCEPT	ACCEPT
NW_020822376.1	234432	66.16	25	8	26.087	23	0	9	25	26.087	ACCEPT	ACCEPT
NW_020822376.1	244103	901.55	88.8889	18	90.9091	22	71.4286	14	17.4603	19.4805	ACCEPT	ACCEPT
NW_020822376.1	349473	145.12	9.52381	21	21.9512	41	0	27	9.52381	21.9512	ACCEPT	ACCEPT
NW_020822376.1	533216	174	46.6667	15	50	8	12.5	8	34.1667	37.5	ACCEPT	ACCEPT
NW_020822376.1	580502	50.37	8.33333	36	17.7778	45	7.69231	13	0.641026	10.0855	ACCEPT	ACCEPT
NW_020822376.1	674511	1056.44	91.6667	24	93.3333	15	88.8889	9	2.77778	4.44444	ACCEPT	ACCEPT
NW_020822376.1	934057	1166.91	87.5	16	94.1176	17	82.6087	23	4.8913	11.509	ACCEPT	ACCEPT
NW_020822376.1	1324056	540.44	91.6667	12	100	8	77.7778	9	13.8889	22.2222	ACCEPT	ACCEPT
NW_020822376.1	1410729	1659.14	86.2069	29	100	27	82.3529	17	3.85396	17.6471	ACCEPT	ACCEPT
NW_020822376.1	1739182	71.54	9.52381	21	25	16	0	11	9.52381	25	ACCEPT	ACCEPT
NW_020822376.1	1742886	103.16	26.6667	15	35.2941	17	11.1111	18	15.5556	24.183	ACCEPT	ACCEPT
NW_020822376.1	1743153	73.13	5.88235	17	27.7778	18	0	11	5.88235	27.7778	ACCEPT	ACCEPT
NW_020822376.1	1815925	1517.16	85.7143	14	95	20	85	20	0.714286	10	ACCEPT	ACCEPT
NW_020822376.1	2130566	908.3	90.9091	11	100	12	83.3333	6	7.57576	16.6667	ACCEPT	ACCEPT
NW_020822376.1	2515089	434.13	27.2727	22	47.3684	19	0	9	27.2727	47.3684	ACCEPT	ACCEPT
NW_020822376.1	2626717	271.12	35.2941	17	45	20	0	13	35.2941	45	ACCEPT	ACCEPT
NW_020822376.1	2782469	784.07	92.3077	13	100	10	83.3333	6	8.97436	16.6667	ACCEPT	ACCEPT
NW_020822376.1	2842976	186.81	12.5	16	66.6667	9	10	10	2.5	56.6667	ACCEPT	ACCEPT
NW_020822376.1	2957094	31.28	13.0435	23	21.0526	19	8.33333	12	4.71014	12.7193	ACCEPT	ACCEPT
NW_020822376.1	2994257	91.89	16.6667	24	23.8095	21	5	20	11.6667	18.8095	ACCEPT	ACCEPT
NW_020822376.1	3040335	1253.02	94.4444	18	100	24	83.3333	6	11.1111	16.6667	ACCEPT	ACCEPT
NW_020822376.1	3318955	58.8	10.3448	29	21.9512	41	6.66667	15	3.67816	15.2846	ACCEPT	ACCEPT
NW_020822376.1	3340750	46.89	10	20	32	25	3.57143	28	6.42857	28.4286	ACCEPT	ACCEPT
NW_020822376.1	3343741	959.13	85.7143	14	100	15	70	10	15.7143	30	ACCEPT	ACCEPT
NW_020822376.1	3536308	1220.12	72	25	93.9394	33	63.6364	11	8.36364	30.303	ACCEPT	ACCEPT
NW_020822376.1	3589163	1476.78	94.4444	18	100	24	87.5	16	6.94444	12.5	ACCEPT	ACCEPT
NW_020822376.1	3615304	195.87	33.3333	21	46.6667	15	9.09091	11	24.2424	37.5758	ACCEPT	ACCEPT
NW_020822376.1	3933686	74.14	23.0769	13	33.3333	15	5	20	18.0769	28.3333	ACCEPT	ACCEPT
NW_020822376.1	4141052	43.33	20	15	40	15	7.69231	13	12.3077	32.3077	ACCEPT	ACCEPT
NW_020822376.1	4241452	209.13	23.0769	26	32.2581	31	5.26316	19	17.8138	26.9949	ACCEPT	ACCEPT
NW_020822376.1	4301623	340.13	19.2308	26	31.0345	29	4.34783	23	14.8829	26.6867	ACCEPT	ACCEPT
NW_020822376.1	4319403	218.89	19.6429	56	21.4286	56	11.1111	27	8.53175	10.3175	ACCEPT	ACCEPT
NW_020822377.1	232131	845.36	90	10	93.75	16	66.6667	15	23.3333	27.0833	ACCEPT	ACCEPT
NW_020822377.1	1156981	178.23	13.3333	15	30	20	0	6	13.3333	30	ACCEPT	ACCEPT
NW_020822377.1	1220815	68.29	15.3846	13	27.2727	22	3.84615	26	11.5385	23.4266	ACCEPT	ACCEPT
NW_020822377.1	1239736	151.66	57.1429	7	81.8182	11	42.8571	7	14.2857	38.961	ACCEPT	ACCEPT
NW_020822377.1	1429747	673.71	88.2353	17	90	10	70	10	18.2353	20	ACCEPT	ACCEPT
NW_020822377.1	1846363	34.23	8	25	23.0769	13	0	15	8	23.0769	ACCEPT	ACCEPT
NW_020822377.1	2373356	2021.12	73.1707	41	92.6829	41	69.2308	13	3.93996	23.4522	ACCEPT	ACCEPT
NW_020822377.1	2454928	770.56	57.1429	28	90.9091	11	33.3333	18	23.8095	57.5758	ACCEPT	ACCEPT
NW_020822377.1	2482980	36.14	11.1111	9	30.7692	13	0	8	11.1111	30.7692	ACCEPT	ACCEPT
NW_020822377.1	2647401	930.39	75	12	100	9	60	15	15	40	ACCEPT	ACCEPT
NW_020822377.1	2755493	162.09	6.06061	33	37.5	24	0	8	6.06061	37.5	ACCEPT	ACCEPT
NW_020822377.1	2780485	40.56	16.6667	24	18.75	16	0	19	16.6667	18.75	ACCEPT	ACCEPT
NW_020822377.1	2792460	565.13	23.8095	21	42.4242	33	0	10	23.8095	42.4242	ACCEPT	ACCEPT
NW_020822377.1	2847368	958.86	56.5217	23	93.3333	15	12.5	8	44.0217	80.8333	ACCEPT	ACCEPT
NW_020822377.1	2908527	34.23	11.1111	18	36.3636	11	0	10	11.1111	36.3636	ACCEPT	ACCEPT
NW_020822377.1	3046594	53.09	13.0435	23	27.2727	22	9.09091	22	3.95257	18.1818	ACCEPT	ACCEPT
NW_020822377.1	3053292	288.05	61.5385	13	83.3333	6	50	12	11.5385	33.3333	ACCEPT	ACCEPT
NW_020822377.1	3069624	970.72	94.1176	17	100	11	85.7143	14	8.40336	14.2857	ACCEPT	ACCEPT
NW_020822377.1	3429702	111.51	18.1818	11	36.8421	19	9.09091	11	9.09091	27.7512	ACCEPT	ACCEPT
NW_020822377.1	3704947	1746.12	65.2174	23	100	19	60.8696	23	4.34783	39.1304	ACCEPT	ACCEPT
NW_020822377.1	3893147	302.22	50	6	100	6	33.3333	6	16.6667	66.6667	ACCEPT	ACCEPT
NW_020822377.1	3982116	1444.26	57.8947	19	92.3077	26	57.1429	21	0.75188	35.1648	ACCEPT	ACCEPT
NW_020822377.1	4242684	255.17	53.8462	13	54.5455	11	0	7	53.8462	54.5455	ACCEPT	ACCEPT
NW_020822377.1	4294834	65.87	10	30	14.2857	21	5.55556	18	4.44444	8.73016	ACCEPT	ACCEPT
NW_020822377.1	4301978	119.12	12.5	48	13.3333	30	0	12	12.5	13.3333	ACCEPT	ACCEPT
NW_020822377.1	4307740	483.32	16.129	31	34.2857	35	5	20	11.129	29.2857	ACCEPT	ACCEPT
NW_020822379.1	49377	281.22	33.3333	15	36.6667	30	0	6	33.3333	36.6667	ACCEPT	ACCEPT
NW_020822379.1	164078	100.13	9.52381	21	18.1818	22	0	18	9.52381	18.1818	ACCEPT	ACCEPT
NW_020822379.1	372074	32.22	18.1818	11	33.3333	9	9.09091	11	9.09091	24.2424	ACCEPT	ACCEPT
NW_020822379.1	492722	55.53	20	10	22.2222	9	7.69231	13	12.3077	14.5299	ACCEPT	ACCEPT
NW_020822379.1	571113	56.15	13.3333	15	18.75	16	0	8	13.3333	18.75	ACCEPT	ACCEPT
NW_020822379.1	660000	160.13	23.0769	13	30	10	0	10	23.0769	30	ACCEPT	ACCEPT
NW_020822379.1	669201	1573.14	85.1852	27	92.8571	28	69.5652	23	15.62	23.2919	ACCEPT	ACCEPT
NW_020822379.1	696209	495.13	46.6667	15	53.3333	15	0	9	46.6667	53.3333	ACCEPT	ACCEPT
NW_020822379.1	1013703	584.17	60	10	100	7	23.0769	13	36.9231	76.9231	ACCEPT	ACCEPT
NW_020822379.1	1101756	64.61	13.3333	15	33.3333	18	0	17	13.3333	33.3333	ACCEPT	ACCEPT
NW_020822379.1	1308146	40.5	9.09091	11	12	7	0	7	9.09091	12	ACCEPT	ACCEPT
NW_020822379.1	1432220	53.23	33.3333	6	42.8571	7	0	6	33.3333	42.8571	ACCEPT	ACCEPT
NW_020822379.1	1553320	965.3	83.3333	12	100	12	71.4286	7	11.9048	28.5714	ACCEPT	ACCEPT
NW_020822379.1	1690585	2617.87	93.3333	15	96.875	32	83.3333	18	10	13.5417	ACCEPT	ACCEPT
NW_020822379.1	1794471	59.09	4.7619	21	25	24	0	20	4.7619	25	ACCEPT	ACCEPT
NW_020822379.1	1932299	155.17	18.1818	11	42.8571	7	0	7	18.1818	42.8571	ACCEPT	ACCEPT
NW_020822379.1	2026513	1122.13	80	20	100	9	57.1429	14	22.8571	42.8571	ACCEPT	ACCEPT
NW_020822379.1	2128123	203.22	44.4444	9	50	10	0	6	44.4444	50	ACCEPT	ACCEPT
NW_020822379.1	2473475	886.16	76.9231	13	94.4444	18	71.4286	7	5.49451	23.0159	ACCEPT	ACCEPT
NW_020822379.1	3165602	143.13	15.3846	13	27.2727	11	0	9	15.3846	27.2727	ACCEPT	ACCEPT
NW_020822379.1	3420017	124.88	25	20	28.5714	21	7.69231	13	17.3077	20.8791	ACCEPT	ACCEPT
NW_020822379.1	3958389	55.15	14.2857	7	23	6	0	10	14.2857	23	ACCEPT	ACCEPT
NW_020822379.1	4153817	153.12	25	16	33.3333	12	4.7619	21	20.2381	28.5714	ACCEPT	ACCEPT
NW_020822379.1	4162134	430.05	54.5455	11	70	10	0	9	54.5455	70	ACCEPT	ACCEPT
NW_020822379.1	4170843	356.15	46.1538	13	46.6667	15	0	8	46.1538	46.6667	ACCEPT	ACCEPT
NW_020822379.1	4283914	160.17	20	10	33.3333	12	0	7	20	33.3333	ACCEPT	ACCEPT
NW_020822381.1	204824	337.88	46.6667	15	52.9412	17	7.69231	13	38.9744	45.2489	ACCEPT	ACCEPT
NW_020822381.1	447309	102.69	10.5263	19	46.1538	13	0	7	10.5263	46.1538	ACCEPT	ACCEPT
NW_020822381.1	455391	77.15	18.1818	11	33.3333	15	0	13	18.1818	33.3333	ACCEPT	ACCEPT
NW_020822381.1	491013	209.88	20.9302	43	27	43	6.66667	30	14.2636	20.3333	ACCEPT	ACCEPT
NW_020822381.1	498723	77.12	11.1111	18	26.9231	26	0	13	11.1111	26.9231	ACCEPT	ACCEPT
NW_020822381.1	563930	121.15	18.1818	11	36.3636	22	0	16	18.1818	36.3636	ACCEPT	ACCEPT
NW_020822381.1	596770	439.13	25.7143	35	40.5405	37	0	10	25.7143	40.5405	ACCEPT	ACCEPT
NW_020822381.1	923400	31.26	10	30	29	29	0	9	10	29	ACCEPT	ACCEPT
NW_020822381.1	924767	95.56	17.3913	23	18.9189	37	7.14286	28	10.2484	11.7761	ACCEPT	ACCEPT
NW_020822381.1	1009537	1148.73	65.2174	46	86.6667	15	51.8519	27	13.3655	34.8148	ACCEPT	ACCEPT
NW_020822381.1	1135248	33.46	13.3333	15	23.5294	17	0	10	13.3333	23.5294	ACCEPT	ACCEPT
NW_020822381.1	1332413	154.09	6.25	32	33.3333	27	4.7619	21	1.4881	28.5714	ACCEPT	ACCEPT
NW_020822381.1	1349851	138.22	15.6863	51	19.697	66	9.52381	42	6.16246	10.1732	ACCEPT	ACCEPT
NW_020822381.1	1396829	47.89	13.4615	52	17.3333	75	5.12821	39	8.33333	12.2051	ACCEPT	ACCEPT
NW_020822381.1	1663501	121.12	17.8571	28	34	32	4.16667	24	13.6905	29.8333	ACCEPT	ACCEPT
NW_020822381.1	1756239	48.11	5	20	14.7059	34	0	31	5	14.7059	ACCEPT	ACCEPT
NW_020822381.1	1799349	48.26	27.2727	22	35	30	8.69565	23	18.5771	26.3043	ACCEPT	ACCEPT
NW_020822381.1	1867542	317.84	62.5	16	85.7143	14	41.6667	12	20.8333	44.0476	ACCEPT	ACCEPT
NW_020822381.1	2031423	345.62	9.09091	33	36	50	6.66667	15	2.42424	29.3333	ACCEPT	ACCEPT
NW_020822381.1	2060106	127.14	25	8	36	17	0	9	25	36	ACCEPT	ACCEPT
NW_020822381.1	2303111	559.12	21.1538	52	37	35	0	17	21.1538	37	ACCEPT	ACCEPT
NW_020822381.1	2401931	81.76	6.66667	15	22.7273	22	5.88235	17	0.784314	16.8449	ACCEPT	ACCEPT
NW_020822381.1	2409319	117.35	13.3333	15	31.5789	19	0	6	13.3333	31.5789	ACCEPT	ACCEPT
NW_020822381.1	2828626	113.13	30	10	35.7143	14	0	9	30	35.7143	ACCEPT	ACCEPT
NW_020822381.1	2870999	110.88	30.7692	13	39	19	9.09091	11	21.6783	29.9091	ACCEPT	ACCEPT
NW_020822381.1	2953709	145.28	31.8182	22	40	16	30	10	1.81818	10	ACCEPT	ACCEPT
NW_020822381.1	3220242	118.09	3.77358	53	17.2414	58	2.04082	49	1.73277	15.2006	ACCEPT	ACCEPT
NW_020822381.1	3223727	121.41	10.4167	48	24	50	9.09091	44	1.32576	14.9091	ACCEPT	ACCEPT
NW_020822381.1	3418624	35.73	33.3333	15	43	17	25	12	8.33333	18	ACCEPT	ACCEPT
NW_020822382.1	37625	41.09	2.5	80	11.4286	70	0	43	2.5	11.4286	ACCEPT	ACCEPT
NW_020822382.1	41134	67.09	7.57576	66	16.1765	68	6.34921	63	1.22655	9.82726	ACCEPT	ACCEPT
NW_020822382.1	92014	310.94	57.1429	7	75	12	0	8	57.1429	75	ACCEPT	ACCEPT
NW_020822382.1	274848	2214.12	73.6842	38	94.7368	38	69.4444	36	4.23977	25.2924	ACCEPT	ACCEPT
NW_020822382.1	357871	159.51	30	10	41.1765	17	12.5	24	17.5	28.6765	ACCEPT	ACCEPT
NW_020822382.1	477559	79.12	4.54545	22	17.6471	34	0	23	4.54545	17.6471	ACCEPT	ACCEPT
NW_020822382.1	695885	361.32	27.5862	29	46	28	6.66667	15	20.9195	39.3333	ACCEPT	ACCEPT
NW_020822382.1	907424	52.12	27.2727	11	47	17	21.4286	14	5.84416	25.5714	ACCEPT	ACCEPT
NW_020822382.1	1144099	118.16	27.2727	22	48	22	11.1111	27	16.1616	36.8889	ACCEPT	ACCEPT
NW_020822382.1	1208120	45.48	12.5	16	36.3636	11	0	7	12.5	36.3636	ACCEPT	ACCEPT
NW_020822382.1	1208719	31.69	12.5	16	18.5185	27	9.09091	11	3.40909	9.42761	ACCEPT	ACCEPT
NW_020822382.1	1289988	79.18	8	25	23.5294	34	0	19	8	23.5294	ACCEPT	ACCEPT
NW_020822382.1	1294678	222.82	50	14	88.8889	9	40	10	10	48.8889	ACCEPT	ACCEPT
NW_020822382.1	1297728	952.12	62.5	16	92.8571	28	61.9048	21	0.595238	30.9524	ACCEPT	ACCEPT
NW_020822382.1	1317944	56.57	21.9512	41	49	26	14.2857	14	7.66551	34.7143	ACCEPT	ACCEPT
NW_020822382.1	1423902	69.17	24	25	50	28	12.5	16	11.5	37.5	ACCEPT	ACCEPT
NW_020822382.1	1438506	127.16	21.0526	19	27.2727	22	5.55556	18	15.4971	21.7172	ACCEPT	ACCEPT
NW_020822382.1	1473024	163.12	19.2308	26	25	40	3.57143	28	15.6593	21.4286	ACCEPT	ACCEPT
NW_020822382.1	1515828	63.17	5.88235	17	23.3333	30	0	20	5.88235	23.3333	ACCEPT	ACCEPT
NW_020822382.1	1675070	61.16	28.5714	7	40	10	10	10	18.5714	30	ACCEPT	ACCEPT
NW_020822382.1	1721642	197.9	22.2222	36	23.4043	47	7.69231	26	14.5299	15.7119	ACCEPT	ACCEPT
NW_020822382.1	1991376	37.05	23.0769	13	53	21	18.75	16	4.32692	34.25	ACCEPT	ACCEPT
NW_020822382.1	2009819	87.15	7.69231	13	40	10	0	9	7.69231	40	ACCEPT	ACCEPT
NW_020822382.1	2135951	250.93	26.087	23	46.1538	13	6.25	16	19.837	39.9038	ACCEPT	ACCEPT
NW_020822382.1	2277254	40.5	8.69565	23	22.8571	35	7.14286	14	1.5528	15.7143	ACCEPT	ACCEPT
NW_020822382.1	2757460	109.87	40	10	57	12	33.3333	12	6.66667	23.6667	ACCEPT	ACCEPT
NW_020822382.1	2984352	116.93	27.2727	11	60	10	14.2857	7	12.987	45.7143	ACCEPT	ACCEPT
NW_020822382.1	3087333	71.25	14.2857	7	21.4286	14	0	6	14.2857	21.4286	ACCEPT	ACCEPT
NW_020822385.1	122972	235.13	20	20	37.931	29	0	27	20	37.931	ACCEPT	ACCEPT
NW_020822385.1	176228	142.12	15.3846	26	22.8571	35	4.34783	23	11.0368	18.5093	ACCEPT	ACCEPT
NW_020822385.1	257439	59.24	8.33333	24	16.129	31	4.34783	23	3.98551	11.7812	ACCEPT	ACCEPT
NW_020822385.1	496684	57.15	16.6667	12	28.5714	7	0	8	16.6667	28.5714	ACCEPT	ACCEPT
NW_020822385.1	544966	133.17	23.5294	17	33.3333	24	0	7	23.5294	33.3333	ACCEPT	ACCEPT
NW_020822385.1	586917	610.51	31.25	32	45.8333	48	9.52381	21	21.7262	36.3095	ACCEPT	ACCEPT
NW_020822385.1	973642	106.23	20	15	63	8	0	6	20	63	ACCEPT	ACCEPT
NW_020822385.1	1146294	80.17	11.1111	18	31.5789	19	0	14	11.1111	31.5789	ACCEPT	ACCEPT
NW_020822385.1	1243743	92.13	23.8095	21	64	11	15.3846	13	8.42491	48.6154	ACCEPT	ACCEPT
NW_020822385.1	1360750	65.53	4.7619	21	40	15	0	15	4.7619	40	ACCEPT	ACCEPT
NW_020822385.1	1548269	60.41	16.6667	12	33.3333	15	7.14286	14	9.52381	26.1905	ACCEPT	ACCEPT
NW_020822385.1	1622226	505.12	76.9231	13	92.8571	14	66.6667	12	10.2564	26.1905	ACCEPT	ACCEPT
NW_020822385.1	1684843	61.81	19.0476	21	66	30	16.6667	30	2.38095	49.3333	ACCEPT	ACCEPT
NW_020822385.1	1935567	51.09	4.34783	23	29.4118	17	0	24	4.34783	29.4118	ACCEPT	ACCEPT
NW_020822385.1	1962728	171.91	42.8571	21	67	23	3.7037	27	39.1534	63.2963	ACCEPT	ACCEPT
NW_020822385.1	2021104	107.17	18.1818	11	50	10	12.5	8	5.68182	37.5	ACCEPT	ACCEPT
NW_020822385.1	2148592	711.27	81.25	16	93.3333	15	68.75	16	12.5	24.5833	ACCEPT	ACCEPT
NW_020822385.1	2332320	30.26	16.6667	6	33.3333	6	0	7	16.6667	33.3333	ACCEPT	ACCEPT
NW_020822385.1	2487139	506.89	87.5	8	100	9	71.4286	7	16.0714	28.5714	ACCEPT	ACCEPT
NW_020822388.1	243328	91.45	10	20	25	20	0	23	10	25	ACCEPT	ACCEPT
NW_020822388.1	267172	262.19	20	10	90	10	0	6	20	90	ACCEPT	ACCEPT
NW_020822388.1	373996	55.14	5.88235	17	23.8095	21	0	11	5.88235	23.8095	ACCEPT	ACCEPT
NW_020822388.1	410042	134.87	17.5	40	17.8571	28	3.7037	27	13.7963	14.1534	ACCEPT	ACCEPT
NW_020822388.1	815778	80.89	18.75	16	28.5714	7	0	9	18.75	28.5714	ACCEPT	ACCEPT
NW_020822388.1	824799	30.1	9.67742	31	16.6667	42	4.16667	24	5.51075	12.5	ACCEPT	ACCEPT
NW_020822388.1	841274	49.16	18.1818	11	28.5714	14	0	10	18.1818	28.5714	ACCEPT	ACCEPT
NW_020822388.1	884610	37.44	7.40741	27	23.8095	21	4.7619	21	2.6455	19.0476	ACCEPT	ACCEPT
NW_020822388.1	917538	52.33	15.3846	13	74	22	0	6	15.3846	74	ACCEPT	ACCEPT
NW_020822388.1	983238	90.53	19.0476	21	29.4118	17	10.5263	19	8.5213	18.8854	ACCEPT	ACCEPT
NW_020822388.1	1019798	107.43	9.52381	21	29.4118	34	0	22	9.52381	29.4118	ACCEPT	ACCEPT
NW_020822388.1	1169431	290.9	23.0769	13	31.0345	29	0	8	23.0769	31.0345	ACCEPT	ACCEPT
NW_020822388.1	1177963	327.64	62.5	8	100	6	54.5455	11	7.95455	45.4545	ACCEPT	ACCEPT
NW_020822388.1	1255650	41.14	28.5714	14	76	9	25	8	3.57143	51	ACCEPT	ACCEPT
NW_020822388.1	1298850	342.12	22.5806	31	31.5789	38	0	26	22.5806	31.5789	ACCEPT	ACCEPT
NW_020822388.1	1338413	147.18	35.2941	17	37.5	24	7.69231	13	27.6018	29.8077	ACCEPT	ACCEPT
NW_020822388.1	1352188	103.87	11.7647	17	25.7143	35	6.66667	15	5.09804	19.0476	ACCEPT	ACCEPT
NW_020822388.1	1459469	66.19	10.3448	29	22.2222	18	0	18	10.3448	22.2222	ACCEPT	ACCEPT
NW_020822388.1	1513609	162.12	12.5	16	25	20	0	28	12.5	25	ACCEPT	ACCEPT
NW_020822388.1	1517422	143.87	60	10	78	8	50	8	10	28	ACCEPT	ACCEPT
NW_020822388.1	1527762	33.11	15	20	19.2308	26	9.52381	21	5.47619	9.70696	ACCEPT	ACCEPT
NW_020822388.1	1544799	270.88	40.9091	22	46.6667	30	10	10	30.9091	36.6667	ACCEPT	ACCEPT
NW_020822388.1	1641130	60.28	9.7561	41	16.6667	42	2.94118	34	6.81492	13.7255	ACCEPT	ACCEPT
NW_020822388.1	1683892	43.06	8.69565	23	21.4286	28	0	12	8.69565	21.4286	ACCEPT	ACCEPT
NW_020822388.1	1717258	90.12	14.2857	35	18.1818	22	0	23	14.2857	18.1818	ACCEPT	ACCEPT
[truncated: 15,887 more rows]

## Sheet: S14 Filter 3
Supplemental Table S14: The intersection of dose-dependent indels (Table S13) and genome-wide microsatellites (S10).
[truncated: 188 more rows]

[truncated: 1 more sheets: S15 Candidate MS]
